# Supplementary material for: A Novel Approach for Early detection of Alzheimer's disease Based on Multi Level Fuzzy Neural Networks
Source: Preprints.org preprint supplement (doi:10.20944/preprints202103.0711.v1), 2021-03-29
Supplement: Supplementary file 1 [file AllInput.xlsx]

## Sheet: Sheet1
0.00997693	0.00832281	0.00839695	0.00866369	0.00975456	0.00814032	0.0109157	0.00914189	0.00797703	0.00685174	0.0119205	0.0119809	0.0141372	0.0115125	0.0132416	0.0110047	0.0150195	0.0143365	0.0121987	0.0118865	0.0185243	0.0179712	0.00960824	0.00970528	0.0136645	0.0159915	0.015025	0.0157054	0.0162298	0.0155453	0.0175523	0.0221645	0.0210679	0.0213842	0.0184912	0.0119363	0.0190839	0.0130362	0.0212455	0.0234947	0.0162201	0.0164459	0.0161167	0.0168038	0.0135022	0.0125268	0.0186764	0.0163683	0.00886845	0.0117844
0.0187057	0.018789	0.0211942	0.0185589	0.0271663	0.0261812	0.022881	0.0236837	0.0276179	0.0287217	0.0208702	0.023802	0.0203871	0.0220261	0.0230254	0.0251546	0.0250589	0.0245091	0.0202919	0.0193571	0.029097	0.0265051	0.0209249	0.0239349	0.0272973	0.0268439	0.0271487	0.0279051	0.0269924	0.0287506	0.0237848	0.0247039	0.0249327	0.0275458	0.0212963	0.0192427	0.0288331	0.0275942	0.0283777	0.0292152	0.0354138	0.0331205	0.0252603	0.0254336	0.0246485	0.0242229	0.025334	0.0230098	0.0211039	0.0214766
0.0112373	0.0100915	0.00969294	0.00899725	0.0101903	0.00905742	0.0119478	0.0105972	0.00922085	0.00730095	0.0134244	0.0135282	0.0151499	0.0126649	0.0132337	0.0108999	0.0158839	0.0160661	0.0124576	0.0141246	0.0189116	0.0181676	0.0102713	0.0107963	0.0149668	0.0165395	0.015472	0.0172424	0.0193708	0.0177014	0.0188336	0.0218377	0.0196049	0.0219562	0.0191794	0.0117234	0.0220402	0.0194818	0.0207864	0.0261215	0.0146576	0.018148	0.0167324	0.0165145	0.0150295	0.0144498	0.0215535	0.019335	0.0112366	0.0138623
0.0151378	0.0124684	0.0171813	0.0184293	0.025261	0.0252542	0.0197227	0.0205493	0.0231791	0.0244305	0.0188364	0.0183938	0.0179554	0.0176327	0.0194134	0.0206231	0.019262	0.022287	0.0172937	0.0155719	0.0262284	0.0241771	0.0179565	0.0198817	0.0246436	0.025164	0.0239982	0.0237481	0.0237512	0.0242963	0.0223913	0.0205324	0.0228003	0.0234767	0.0228424	0.0189576	0.0243537	0.0211202	0.0245887	0.0247375	0.0320184	0.0268085	0.0191646	0.0203539	0.0173294	0.0162874	0.0228384	0.018764	0.0166654	0.0155344
0.0152296	0.0144694	0.0190322	0.01786	0.0200997	0.021314	0.0196945	0.0202545	0.0222303	0.0230948	0.0169801	0.0158422	0.0176852	0.017043	0.018649	0.0188208	0.0187271	0.0202333	0.0191035	0.0165541	0.0240053	0.0241768	0.0176652	0.0196304	0.024738	0.0233597	0.0223576	0.0236791	0.020554	0.0229693	0.0208425	0.0202955	0.0198776	0.0205269	0.0178337	0.0179552	0.0244639	0.0264701	0.0241399	0.0270916	0.0299825	0.0305495	0.022498	0.0230461	0.0188323	0.020061	0.0241623	0.0222503	0.0172434	0.0171774
0.0145244	0.0127262	0.018907	0.0180445	0.023628	0.0226647	0.0207769	0.0207885	0.0236009	0.024366	0.0171141	0.017216	0.0189608	0.0183871	0.0211268	0.021796	0.0196058	0.0213944	0.0201845	0.0183971	0.0256146	0.0219907	0.0208553	0.0233607	0.0240294	0.02355	0.0247707	0.0245504	0.0239796	0.0231513	0.0216904	0.0209673	0.021393	0.022157	0.0152676	0.0142707	0.0280055	0.023164	0.0260976	0.0249779	0.032181	0.0268067	0.0209276	0.0207061	0.0190207	0.020642	0.0216256	0.019127	0.0159705	0.0167836
0.010769	0.00829929	0.00830752	0.00768941	0.00851027	0.00760744	0.0104303	0.00839511	0.0082363	0.00661939	0.0127192	0.0124936	0.0143307	0.0116511	0.0127093	0.0111394	0.0156721	0.0149973	0.0115646	0.0124648	0.0160032	0.0163828	0.00925309	0.00935668	0.013021	0.0147217	0.0137516	0.0148514	0.0168962	0.0164608	0.0155921	0.0189052	0.0186181	0.018541	0.0141277	0.00984629	0.0202731	0.015909	0.0183766	0.0217661	0.0140459	0.0155859	0.0168372	0.016195	0.0153206	0.0147804	0.0199007	0.0171295	0.0108367	0.0124168
0.0135249	0.0127188	0.00891261	0.00830316	0.0089908	0.00797191	0.0118122	0.00977453	0.00816119	0.00681497	0.0124989	0.0130291	0.0141918	0.0121427	0.011747	0.00990405	0.0150074	0.0163159	0.0104014	0.0112505	0.0167134	0.016124	0.00851995	0.00931528	0.0120525	0.0137843	0.013592	0.0147435	0.0166414	0.015556	0.0154527	0.019254	0.0189053	0.0199651	0.0165649	0.0112231	0.0203092	0.0176142	0.019058	0.022702	0.0155533	0.0168043	0.015596	0.0165084	0.0164654	0.018006	0.0193645	0.0173016	0.0150014	0.0172662
0.0169999	0.0142865	0.0172889	0.0165263	0.02289	0.0240061	0.0192933	0.0203284	0.0228206	0.0271816	0.018156	0.0184901	0.0177983	0.0181412	0.0214032	0.0230037	0.0200107	0.0213082	0.0203307	0.0187973	0.029325	0.028581	0.019029	0.0221714	0.02496	0.0263076	0.0231213	0.0258537	0.0252509	0.0261629	0.0237347	0.0237888	0.0238516	0.0238727	0.0208059	0.0192292	0.02929	0.0260673	0.0282726	0.0298694	0.0371425	0.0333438	0.0208714	0.0222182	0.0186975	0.0183728	0.0255979	0.0214131	0.0151418	0.0161182
0.0103396	0.0082013	0.00806936	0.00746459	0.00778558	0.00711874	0.0101899	0.00875571	0.00704616	0.00603015	0.012778	0.0126794	0.0146691	0.0119047	0.0115582	0.0105709	0.0151762	0.0140628	0.0108637	0.011806	0.0161692	0.0154894	0.00892028	0.00995175	0.0136897	0.0159827	0.0144097	0.0168051	0.0163041	0.0160405	0.0151977	0.0198954	0.015734	0.0180437	0.0146136	0.0103933	0.0230059	0.0185586	0.0222708	0.0255768	0.0163754	0.0161577	0.0136966	0.0142985	0.0127761	0.0135712	0.0179877	0.0163985	0.00975245	0.0113119
0.00998407	0.0084354	0.00794339	0.00744177	0.00828485	0.00737525	0.00974313	0.00724908	0.00770558	0.00675118	0.0119417	0.0129425	0.0142421	0.0116889	0.011475	0.0102081	0.0142126	0.0133827	0.0103011	0.0118501	0.0157608	0.0153698	0.00867231	0.00891383	0.0125344	0.0137404	0.0134296	0.0147745	0.0169345	0.0157509	0.0140461	0.0189908	0.0163879	0.0182749	0.0135897	0.010046	0.0206826	0.0164103	0.0174861	0.0196617	0.0142026	0.0154307	0.0140444	0.0145396	0.0131641	0.0134221	0.0181729	0.0160257	0.0100299	0.0108331
0.0104933	0.00826998	0.00834829	0.00839425	0.00897949	0.00833798	0.011446	0.00922825	0.00839112	0.00688936	0.0127901	0.0127063	0.0143346	0.0123942	0.0127069	0.0106652	0.0160799	0.0139713	0.0119191	0.011512	0.0165742	0.016481	0.00893507	0.00995103	0.0133808	0.0151491	0.014806	0.0156946	0.0186269	0.0178558	0.0181472	0.0207447	0.0178197	0.0188164	0.0144461	0.00994893	0.0227677	0.0182996	0.0186898	0.022617	0.0155645	0.0151549	0.0126531	0.0128537	0.0107205	0.0107122	0.0152501	0.0149931	0.0092729	0.0105161
0.0101264	0.00880488	0.00812733	0.00849312	0.00908075	0.00834884	0.0114487	0.0100909	0.00842203	0.00723767	0.0132718	0.0127476	0.01442	0.0122081	0.0139066	0.0119996	0.0147301	0.0153277	0.013019	0.0128037	0.0155906	0.0146782	0.00933604	0.00970486	0.0139289	0.0148338	0.0140243	0.0151187	0.0171819	0.0168769	0.0168086	0.0189061	0.0173445	0.0179379	0.0149127	0.0100374	0.0218111	0.0180044	0.0199504	0.0227758	0.0157401	0.0153474	0.0140595	0.0140766	0.013065	0.0136341	0.017333	0.0152117	0.010266	0.0106357
0.0170896	0.0162459	0.0193112	0.0182591	0.0253592	0.0249547	0.0213523	0.0228648	0.0261879	0.0259171	0.0214242	0.0221104	0.0217449	0.0217108	0.0206949	0.0208031	0.0235601	0.0256938	0.0201461	0.0192667	0.0271857	0.023894	0.019355	0.0225629	0.0286849	0.0268518	0.0285746	0.029647	0.0279243	0.0286612	0.0218018	0.0220189	0.0239717	0.0247917	0.0202896	0.0177529	0.0316075	0.030463	0.0290558	0.0292616	0.0382965	0.0324699	0.020699	0.0222646	0.0210863	0.0214461	0.0242103	0.0213908	0.0168611	0.0162798
0.0119681	0.0118185	0.00975925	0.0105377	0.0108805	0.00970588	0.0123664	0.0115389	0.00990267	0.00811199	0.013876	0.014457	0.0147529	0.0135968	0.0134631	0.0120952	0.0173259	0.0181873	0.013163	0.0156661	0.0194703	0.0193076	0.0116295	0.0119204	0.0157771	0.0179766	0.015965	0.0190617	0.0211291	0.0193702	0.0207616	0.025173	0.0208457	0.0238733	0.0166881	0.0109889	0.0232342	0.0196939	0.0222844	0.0248246	0.0171733	0.0176224	0.0124864	0.0136433	0.0120506	0.0130959	0.0179189	0.0173688	0.00931898	0.0119597
0.0143531	0.013016	0.0150832	0.0139524	0.0200266	0.018299	0.0163237	0.0164675	0.0178973	0.0183146	0.0146477	0.0159079	0.0134024	0.0146379	0.0168448	0.0171441	0.0162292	0.0186762	0.0175179	0.015204	0.024842	0.0204601	0.0155416	0.017679	0.022157	0.0209498	0.0208127	0.0218388	0.0213475	0.0217373	0.0204819	0.0195933	0.0208185	0.0219732	0.01465	0.014222	0.024807	0.0234001	0.0244172	0.024048	0.0332892	0.0280162	0.0165225	0.0169315	0.0152337	0.0160393	0.0182269	0.0168229	0.0118342	0.0132186
0.0182789	0.0166057	0.0203576	0.0191114	0.0274981	0.0257967	0.021791	0.022505	0.0266691	0.0266087	0.019408	0.0214456	0.0196411	0.0204268	0.0253439	0.0246012	0.0190223	0.0219445	0.0216234	0.0210627	0.0303036	0.0275497	0.020035	0.0228382	0.0274238	0.0265941	0.027233	0.0282789	0.0247164	0.0271751	0.0218614	0.021571	0.0237514	0.0253113	0.0206416	0.0187991	0.0295436	0.0293802	0.0292725	0.0285669	0.036751	0.0323892	0.026941	0.0284073	0.024897	0.0247981	0.0250214	0.0241637	0.0205019	0.0227795
0.0106445	0.00960125	0.00857442	0.00819048	0.00878665	0.0077888	0.0106217	0.00907462	0.00770713	0.00653476	0.0113475	0.0117639	0.0133583	0.0120685	0.0124507	0.0110107	0.0145668	0.0143276	0.00999414	0.01186	0.0167004	0.0160593	0.00925763	0.0105257	0.0131544	0.0155444	0.0153221	0.0149005	0.0165436	0.0159776	0.0142116	0.0198199	0.0154081	0.0195864	0.017152	0.0123593	0.0252335	0.0202619	0.0224019	0.0256968	0.0160726	0.017611	0.0155159	0.0162131	0.0153031	0.0152283	0.0209644	0.0187929	0.0122616	0.0157776
0.0122739	0.0103239	0.0097922	0.00983079	0.0107019	0.0101506	0.0133477	0.00986755	0.00957677	0.00824755	0.0145825	0.0150393	0.0171999	0.0140904	0.0154221	0.0126146	0.018105	0.0166022	0.0125121	0.0142174	0.0194725	0.018332	0.0106139	0.010431	0.015388	0.0179122	0.0163663	0.0174111	0.0189332	0.018168	0.0195153	0.0240649	0.0219646	0.0230009	0.0215693	0.0126601	0.0229446	0.0173703	0.0225516	0.0265045	0.0175413	0.0190015	0.01602	0.0156742	0.0155506	0.0152981	0.0211707	0.0194023	0.0119581	0.0150042
0.00946778	0.00796679	0.00744531	0.00667387	0.0073349	0.00643374	0.00908822	0.00718469	0.00687488	0.00552344	0.0113238	0.0112152	0.0128665	0.0097332	0.0101469	0.00897286	0.0130742	0.0135284	0.00927702	0.0101885	0.0156889	0.0150548	0.00795753	0.00734699	0.011636	0.012667	0.0120411	0.0132409	0.0131463	0.0125576	0.0145401	0.0182268	0.0159362	0.0185612	0.0159579	0.0107735	0.0187738	0.014005	0.0178978	0.0225585	0.0139064	0.015137	0.0139156	0.014236	0.0120652	0.0122493	0.0166803	0.0158652	0.0105963	0.0120313
0.0172685	0.015458	0.0193575	0.0188787	0.025681	0.0264832	0.0223564	0.0224035	0.0264851	0.02828	0.0194542	0.0214968	0.0227928	0.0205307	0.023184	0.0243165	0.0251853	0.0267156	0.0223966	0.0195338	0.0263078	0.0251247	0.0221929	0.026942	0.0280034	0.0285839	0.0252637	0.0265068	0.0265326	0.0276546	0.0258167	0.0261342	0.023189	0.0241728	0.0236462	0.0249673	0.0307594	0.031269	0.0291466	0.0301412	0.0390128	0.0351071	0.0259484	0.0247184	0.0204456	0.0215255	0.0280404	0.0231701	0.0175981	0.0170345
0.00876828	0.00760347	0.00760576	0.00707911	0.00700781	0.00639864	0.00869546	0.00667966	0.00662443	0.00522478	0.0111301	0.0114977	0.0128918	0.0113119	0.0108036	0.00894651	0.0137294	0.0132807	0.00884207	0.0107034	0.0148995	0.0152475	0.00690196	0.00734966	0.0117848	0.0130964	0.0120162	0.0123658	0.015008	0.0148488	0.0142094	0.018458	0.0182121	0.0207279	0.0143082	0.0102518	0.0179507	0.0141369	0.0175901	0.0213918	0.0135055	0.015112	0.0137401	0.0140784	0.0116572	0.0120331	0.0182013	0.0169175	0.0101989	0.0116197
0.0171316	0.0156549	0.02017	0.0195598	0.0274631	0.0261793	0.0215201	0.0228928	0.0244955	0.0252607	0.0197089	0.0216087	0.0189624	0.0190329	0.0214938	0.0220053	0.0206049	0.0259408	0.0173724	0.0150102	0.0305823	0.0319274	0.0198524	0.0216184	0.0280718	0.02909	0.0266457	0.0257197	0.0223785	0.0247708	0.0296598	0.0295255	0.0259376	0.0262246	0.0262373	0.0229527	0.0208931	0.0245702	0.0263789	0.0295795	0.0350458	0.0350658	0.0219446	0.0245193	0.0199254	0.0220179	0.0243286	0.0226404	0.0184901	0.0207537
0.0164814	0.0163624	0.0192918	0.0201395	0.0249142	0.0264	0.0221822	0.023398	0.0243444	0.0260676	0.0168652	0.0182249	0.0179145	0.0178131	0.0205834	0.0213995	0.017055	0.020177	0.0195976	0.0164172	0.0276265	0.0289057	0.0196313	0.0226891	0.0245845	0.0248221	0.02515	0.0256721	0.0235887	0.0260912	0.0253136	0.0245198	0.0252061	0.0253826	0.0236307	0.0217169	0.0268613	0.0265842	0.02912	0.029533	0.0392807	0.0335576	0.023259	0.0227284	0.0214897	0.0209627	0.0233336	0.0222821	0.0194707	0.0195064
0.0118341	0.00979118	0.00944531	0.00948807	0.00934294	0.00837719	0.0120085	0.00961162	0.00849349	0.00683235	0.0141536	0.0131975	0.0145282	0.0121351	0.0112596	0.00994755	0.0169031	0.0162176	0.0128488	0.0144558	0.0168578	0.016333	0.00967933	0.010468	0.0130719	0.0148039	0.0134227	0.0158004	0.0173273	0.0163489	0.0156753	0.0208622	0.018703	0.0217693	0.0170747	0.0115182	0.0243075	0.019785	0.0224424	0.0269575	0.0169278	0.0179249	0.0161738	0.0158626	0.0139162	0.0135359	0.0193666	0.0159912	0.0102805	0.0121269
0.0203761	0.0191061	0.0214385	0.0191651	0.0260696	0.0261662	0.0257261	0.0249066	0.0230846	0.0249935	0.0208283	0.0224212	0.0193767	0.0194278	0.0224778	0.0224685	0.024659	0.023246	0.0183242	0.0173438	0.0371103	0.0335616	0.0208355	0.0219405	0.0290662	0.0300476	0.027573	0.0296158	0.0265543	0.0241932	0.0330829	0.0308516	0.0295603	0.0301495	0.0311073	0.0304203	0.0285709	0.0213644	0.028369	0.0280492	0.0369243	0.0290562	0.0254135	0.0282469	0.022213	0.0223202	0.02806	0.0245689	0.0221092	0.0194656
0.0135043	0.0107703	0.0101574	0.0100823	0.010928	0.00979689	0.0130878	0.0101646	0.0100499	0.0084647	0.0145502	0.0151806	0.0167797	0.0128565	0.016457	0.0136009	0.0190893	0.0181445	0.0151172	0.0154313	0.0200475	0.0192409	0.0107723	0.011879	0.0162847	0.0177717	0.0173306	0.0189224	0.022123	0.0209493	0.020868	0.0233906	0.0229357	0.0239056	0.0211792	0.013402	0.0243559	0.0200251	0.0246081	0.0269202	0.0172511	0.0192448	0.0207274	0.0189609	0.0193309	0.0181211	0.0231044	0.0201576	0.0145321	0.0159836
0.0109029	0.00928102	0.00852576	0.00831047	0.00979695	0.00905299	0.0113826	0.0088941	0.00884944	0.00765433	0.0127348	0.0127828	0.0154005	0.0120859	0.0148676	0.0123297	0.0160649	0.0147141	0.0134458	0.013278	0.0186314	0.0186204	0.00950721	0.00953569	0.0138698	0.0153677	0.0149648	0.0173258	0.0177117	0.0160934	0.0169283	0.0214892	0.022211	0.022647	0.0194042	0.013258	0.0227383	0.0187594	0.0230736	0.0240539	0.0141989	0.0168851	0.0208904	0.020455	0.0169215	0.0156437	0.0242059	0.0206578	0.0127744	0.0149906
0.00939139	0.00793296	0.00759478	0.00749865	0.00792419	0.00701682	0.00890415	0.00713879	0.00728636	0.00592998	0.0117873	0.0119946	0.0141361	0.0112452	0.011571	0.00994155	0.0130401	0.014177	0.0115228	0.0121551	0.0153458	0.015855	0.00898314	0.0089459	0.0128257	0.0143155	0.0125897	0.0137069	0.0144567	0.013189	0.0163767	0.0192355	0.0201958	0.0197175	0.0166087	0.0109918	0.0165175	0.0128291	0.0165973	0.0202269	0.0121218	0.0132063	0.0158709	0.0154241	0.0132871	0.011776	0.0185778	0.0156523	0.00972087	0.0103691
0.0141633	0.0142768	0.0176108	0.0176495	0.0245812	0.0242833	0.0201478	0.0205159	0.0256948	0.0275746	0.0205323	0.0202781	0.0199218	0.0190119	0.0232605	0.0237497	0.0209524	0.0226049	0.0202196	0.02009	0.0279774	0.0261173	0.0193593	0.0228472	0.0256887	0.0247669	0.0280987	0.0294763	0.0264837	0.0270449	0.0214355	0.0211361	0.019856	0.0224031	0.0135854	0.0135589	0.0308447	0.0293826	0.0287994	0.029414	0.038099	0.0336703	0.0215776	0.0225771	0.0228836	0.0218399	0.0237732	0.0225087	0.0170107	0.0174407
0.00925164	0.00812905	0.00750045	0.00760204	0.00896331	0.00737494	0.00989456	0.0078381	0.00812505	0.00665356	0.0119571	0.0114371	0.0128867	0.0104324	0.0118925	0.0100007	0.0140873	0.014732	0.0112593	0.0133176	0.0153964	0.0158829	0.00849759	0.00920758	0.0125685	0.0143711	0.0141875	0.0153484	0.0159891	0.0162286	0.0146809	0.0183873	0.0167611	0.0186837	0.0128493	0.0101719	0.0217064	0.0179387	0.018983	0.0222641	0.0162442	0.0156908	0.014566	0.0155519	0.013987	0.014382	0.0184003	0.0176341	0.0109625	0.0117363
0.0158006	0.0159138	0.0185294	0.0192289	0.0272453	0.0254632	0.0198523	0.0211533	0.0265252	0.0259541	0.0182203	0.0200096	0.0189204	0.0196328	0.0200676	0.0207966	0.0216448	0.0250591	0.0215226	0.0175209	0.0289905	0.0254716	0.0211156	0.0229606	0.0271339	0.0274401	0.0273663	0.0264141	0.0259471	0.0281473	0.02413	0.021236	0.0195387	0.0207292	0.0173856	0.0171462	0.0292756	0.0292674	0.0291478	0.0299446	0.0389094	0.0371064	0.0198649	0.0216771	0.0187214	0.0180037	0.0237937	0.0216824	0.0155558	0.0162729
0.0171135	0.0149959	0.0197223	0.0185702	0.0235012	0.0224905	0.0212235	0.0230344	0.0242245	0.0263326	0.0176871	0.0194878	0.0195102	0.0191784	0.0210951	0.0229245	0.020546	0.0219745	0.020175	0.0180255	0.0292061	0.028877	0.0191808	0.0217918	0.0244965	0.0245285	0.0236924	0.0255595	0.0238354	0.0262668	0.0226951	0.0214933	0.021344	0.0225682	0.0177931	0.0156229	0.0271618	0.0271496	0.0241668	0.0257912	0.0351375	0.0311204	0.0212474	0.0223668	0.0196416	0.0199846	0.0216315	0.0197154	0.0167466	0.0177477
0.0136452	0.0129176	0.0154974	0.0155058	0.0214071	0.021059	0.0176562	0.0185725	0.0208603	0.0213292	0.0148445	0.0168296	0.0156563	0.0167127	0.0176651	0.0178924	0.0162175	0.0180084	0.0164429	0.0152065	0.0224988	0.0168562	0.0171336	0.0196708	0.022673	0.0210471	0.0202467	0.0222952	0.0206749	0.0204454	0.0185582	0.01833	0.0200587	0.0204074	0.0147273	0.0124741	0.0258245	0.0223028	0.0254951	0.0244002	0.0329272	0.0286743	0.019724	0.0181023	0.0175732	0.0174454	0.0209097	0.0181603	0.0135121	0.0158081
0.0169745	0.0157585	0.0178879	0.0178764	0.024379	0.0247893	0.0214252	0.0216153	0.0237563	0.0247316	0.018838	0.0186496	0.0189106	0.0198483	0.0192277	0.0204744	0.0193105	0.0231436	0.0208703	0.0186744	0.0252875	0.0226815	0.0199417	0.0219037	0.0254491	0.0250853	0.0252499	0.0262163	0.0250898	0.0261038	0.0221215	0.0226224	0.0226748	0.0256887	0.0205057	0.0188242	0.0296685	0.0288012	0.0284195	0.0299417	0.0382845	0.0352096	0.0205042	0.0224005	0.0198602	0.0184591	0.0243224	0.0211903	0.0162392	0.0162335
0.0108779	0.00931456	0.00891261	0.00826875	0.00903652	0.00813946	0.0116144	0.00874955	0.00868703	0.00714897	0.0130363	0.012731	0.0141211	0.0117319	0.0115611	0.00996776	0.0142317	0.0154619	0.0117723	0.0133602	0.0155054	0.0157611	0.00969378	0.00998545	0.0125098	0.0145666	0.0135378	0.0146097	0.0143827	0.0145051	0.0146394	0.0195816	0.0176377	0.0205072	0.0156745	0.0113114	0.0217469	0.0189724	0.0193785	0.0227431	0.0141501	0.0163788	0.0157546	0.0158769	0.014826	0.0143612	0.0188983	0.0175177	0.0109651	0.0128284
0.0191606	0.0179469	0.0233145	0.0219615	0.025777	0.0266493	0.0246175	0.0261127	0.0279411	0.0288399	0.0218768	0.0227642	0.0226352	0.0224414	0.0245647	0.0235503	0.0251723	0.0286117	0.0221927	0.0207681	0.030476	0.03071	0.0239151	0.0259117	0.0280798	0.0287667	0.0259689	0.0277634	0.0318194	0.0304006	0.0266612	0.0275744	0.0241775	0.02701	0.0223516	0.0208166	0.03229	0.0317585	0.0302301	0.0304002	0.0397497	0.0365272	0.0247929	0.0248973	0.023704	0.0244304	0.0258195	0.0238191	0.0203425	0.0206799
0.0190011	0.0178492	0.018857	0.020426	0.0250514	0.0248687	0.0222921	0.0234135	0.0249857	0.0271739	0.021694	0.0207985	0.0204978	0.0194992	0.021909	0.021704	0.0242802	0.0254961	0.0231341	0.0212666	0.0256897	0.0254999	0.021342	0.024098	0.0265526	0.0238306	0.0252965	0.0266408	0.0269499	0.0262583	0.0218285	0.0223929	0.0244126	0.0269757	0.0196111	0.0187232	0.0293257	0.0275666	0.029576	0.0292686	0.040538	0.0356348	0.0263897	0.026935	0.0235767	0.0242747	0.0262888	0.0247564	0.0177224	0.0211888
0.0155237	0.0152294	0.0184956	0.0177122	0.02734	0.0277225	0.0222139	0.0210775	0.0274452	0.0279875	0.0160756	0.0177213	0.0176598	0.0168966	0.0221912	0.0229085	0.0176916	0.0219037	0.0186932	0.018095	0.0328333	0.0287327	0.0201653	0.0221374	0.0272756	0.0277092	0.0282185	0.0304657	0.0253531	0.0275242	0.0232325	0.0248316	0.0234742	0.0254799	0.0218099	0.0211503	0.031688	0.0316562	0.0336519	0.0343386	0.0418304	0.0377526	0.0263136	0.0251706	0.0240607	0.023326	0.026805	0.0229232	0.0204322	0.018375
0.0224292	0.0193124	0.0196755	0.0186655	0.0268455	0.0261514	0.0225581	0.0235076	0.0240301	0.0233914	0.018044	0.0189533	0.0177537	0.0191623	0.0202991	0.0212127	0.0210725	0.0227869	0.0195888	0.0170972	0.0251629	0.0233307	0.0180629	0.0197385	0.0254793	0.0247898	0.0256807	0.0260997	0.0239098	0.0249625	0.0228405	0.0225896	0.0258529	0.0264232	0.0287997	0.0275242	0.0261147	0.0228072	0.0303628	0.0303899	0.0353386	0.0293541	0.026721	0.0281469	0.0223607	0.0224228	0.0282744	0.0251001	0.0201325	0.0200044
0.0111157	0.00925406	0.00932418	0.00899536	0.00937017	0.00832508	0.0117903	0.00968409	0.00788082	0.00676738	0.0129299	0.0142086	0.014199	0.0132819	0.0125722	0.0110097	0.0145754	0.0153529	0.0117439	0.0138842	0.0157825	0.0166918	0.0101616	0.00975348	0.0125565	0.0135437	0.0140647	0.0145126	0.0159063	0.0162087	0.0158309	0.019528	0.0173241	0.0206556	0.0144438	0.00965536	0.0192141	0.0142216	0.0172835	0.0198716	0.0120202	0.0134559	0.0170146	0.018118	0.0150207	0.0139816	0.0201703	0.0177328	0.0105296	0.0116097
0.0160216	0.0162219	0.0162143	0.01601	0.0228844	0.0234266	0.0191941	0.019864	0.0227591	0.0225605	0.0182313	0.0163576	0.0178789	0.0160244	0.0194781	0.01964	0.0188657	0.0208996	0.01717	0.0138516	0.0246172	0.0219516	0.0159816	0.0170177	0.0222917	0.0211462	0.0262943	0.0270306	0.021026	0.0216279	0.0215228	0.0205657	0.0225811	0.0210676	0.0183879	0.0165318	0.0235624	0.0216789	0.0244964	0.0285126	0.0344319	0.032516	0.0215773	0.0230196	0.0203851	0.0193622	0.0230601	0.0192552	0.01722	0.0197036
0.0105653	0.00955789	0.00862415	0.00861711	0.00904381	0.00775915	0.0109231	0.00829087	0.00833619	0.00675275	0.0129133	0.0128367	0.0147274	0.0108944	0.0123936	0.00969836	0.0144741	0.0146678	0.011457	0.0134439	0.0160121	0.0163542	0.00855649	0.00930608	0.012139	0.0141646	0.0127465	0.0146126	0.0157355	0.0142952	0.014442	0.0182688	0.0189568	0.0216006	0.0175881	0.0113211	0.0209799	0.0179577	0.0193195	0.0238907	0.0149798	0.0151375	0.0152064	0.0168754	0.0126523	0.0133324	0.0188119	0.0177444	0.0109056	0.0129157
0.0161444	0.0150705	0.0187499	0.0186798	0.0241645	0.0222374	0.0201713	0.0223664	0.0241398	0.0259091	0.0201121	0.020397	0.0186423	0.0205006	0.0206054	0.0222832	0.0178151	0.0214336	0.0208664	0.0189696	0.0256754	0.0237607	0.0192438	0.0226073	0.0236404	0.0237389	0.0237298	0.0245672	0.0238362	0.026035	0.0199307	0.0207684	0.0200136	0.0218996	0.016596	0.0151983	0.0258068	0.0260912	0.02192	0.0245489	0.0327202	0.0292632	0.0210371	0.0207688	0.0211276	0.0183974	0.0219082	0.0204668	0.0172023	0.0181091
0.0169204	0.0163453	0.0170785	0.0175506	0.0228573	0.0231972	0.0195649	0.0206513	0.021875	0.0219771	0.0191425	0.0174914	0.0175975	0.0176281	0.0201893	0.0206946	0.0175991	0.0195888	0.0189537	0.0182008	0.0292514	0.0258384	0.0169583	0.019763	0.0242777	0.0241754	0.0241898	0.0245779	0.0226912	0.0245278	0.0217647	0.0190697	0.022674	0.0221256	0.0193819	0.0168157	0.0237257	0.0244911	0.0276579	0.0271437	0.037764	0.0334431	0.02024	0.0209484	0.0193192	0.0189426	0.0226571	0.0198386	0.0146135	0.0158721
0.0103926	0.00936073	0.00875187	0.00819983	0.00927877	0.00777005	0.0113843	0.00898539	0.00818291	0.00643254	0.0127226	0.0123294	0.0144171	0.0112514	0.0132952	0.0104252	0.0132719	0.0131554	0.0115238	0.0130889	0.0173645	0.0164185	0.0100122	0.00969228	0.0138956	0.0151446	0.0148028	0.0158672	0.0172912	0.0156191	0.017109	0.0198449	0.0166039	0.0190898	0.014955	0.00994227	0.0184174	0.0151998	0.0192643	0.02097	0.0131917	0.0147758	0.0162123	0.0166654	0.0140625	0.0138336	0.0197451	0.0174961	0.0105678	0.0123788
0.0150534	0.0161593	0.0155146	0.0148633	0.020111	0.0201122	0.0177386	0.0193264	0.0207981	0.02064	0.0150777	0.0178258	0.0158746	0.0179625	0.0176318	0.0179403	0.0160393	0.0183355	0.0174835	0.0159065	0.0226539	0.0174762	0.0162945	0.0171601	0.021832	0.0210326	0.0228387	0.0235951	0.0201405	0.0197246	0.0169975	0.016424	0.0189978	0.0187219	0.0144746	0.0137139	0.0200808	0.019151	0.0206066	0.0227251	0.0293741	0.0263847	0.0182442	0.018742	0.0165782	0.015555	0.0202773	0.0183345	0.0146611	0.0153457
0.0157979	0.0141826	0.0162651	0.0158355	0.022086	0.021453	0.0173525	0.0186232	0.0209635	0.0225672	0.0144918	0.0160705	0.0153908	0.015038	0.0192603	0.0173101	0.0169259	0.0195934	0.0180516	0.0176254	0.0217866	0.0215792	0.0168477	0.0177505	0.0221792	0.0227927	0.0220981	0.0248326	0.0196786	0.0211511	0.0192193	0.0201143	0.0207227	0.0204739	0.018227	0.0168667	0.0224648	0.0196672	0.0251729	0.024845	0.0362156	0.0305007	0.018551	0.0192976	0.0180819	0.0192764	0.0215362	0.0186689	0.0140419	0.0164281
0.0207988	0.0186939	0.0213116	0.0208139	0.0238208	0.0255329	0.024104	0.0258327	0.0241172	0.027446	0.0199744	0.0198838	0.0210108	0.0206752	0.0222798	0.0221031	0.021969	0.0236197	0.0225423	0.0220279	0.0284835	0.0281306	0.0202988	0.0230266	0.0247224	0.0269296	0.0245352	0.0262038	0.0257536	0.0271011	0.0245049	0.0256057	0.0258158	0.0282626	0.0282136	0.0275902	0.0236078	0.0185841	0.0246799	0.0280088	0.0369563	0.0324629	0.023913	0.023181	0.0225763	0.0232335	0.0270474	0.0237734	0.0190984	0.0180549
0.0186918	0.0214743	0.02289	0.0219123	0.0275305	0.0255325	0.0227118	0.0244745	0.02659	0.0264599	0.0220571	0.0225204	0.0217118	0.0212186	0.0215649	0.0226873	0.0238448	0.0264956	0.0232509	0.021267	0.0271521	0.026711	0.0233414	0.0258442	0.0272723	0.0276875	0.0319419	0.0288276	0.0288732	0.0278143	0.0229212	0.023056	0.024171	0.025427	0.0217487	0.0210628	0.0251281	0.0251521	0.0290578	0.028534	0.0369863	0.0331574	0.0208041	0.0210727	0.0187269	0.0202464	0.0255944	0.0230963	0.0169314	0.0190542
0.0128769	0.0105969	0.0105964	0.0104561	0.0105186	0.00941146	0.0130334	0.0114965	0.00986797	0.00806338	0.0153191	0.014431	0.017222	0.0142157	0.0148097	0.0130264	0.0187307	0.0168695	0.0140648	0.0157212	0.0187475	0.0185748	0.0109945	0.0115483	0.0152833	0.0172988	0.0171263	0.0183594	0.020178	0.0204376	0.0207176	0.0229046	0.021969	0.0235978	0.019228	0.0132352	0.0264365	0.0208071	0.0257455	0.0294216	0.0186843	0.0204207	0.0174654	0.0169098	0.0153542	0.0167316	0.0210965	0.0202562	0.0120864	0.0140249
0.0154589	0.013475	0.0167101	0.0172131	0.0233717	0.0239895	0.0180395	0.0202277	0.0208633	0.0232574	0.0172546	0.01892	0.0174518	0.0168331	0.0207847	0.0221718	0.0185701	0.0194423	0.0198721	0.0190488	0.0276062	0.0224754	0.0189747	0.0221862	0.0232766	0.0239705	0.0251035	0.0265733	0.0242481	0.025822	0.0202	0.0208625	0.0206169	0.0224328	0.0174012	0.0154031	0.0291181	0.0282952	0.0278098	0.0297653	0.0388996	0.0372158	0.0202383	0.0212576	0.0184886	0.0189791	0.0209766	0.0198929	0.0160004	0.0168409
0.0136583	0.0138679	0.0165809	0.0163587	0.0211522	0.0217447	0.018244	0.0189499	0.0223057	0.0230486	0.0188663	0.0184324	0.0182675	0.0188585	0.0210842	0.0204436	0.0195719	0.0230383	0.01935	0.0163055	0.0264022	0.0251426	0.0186827	0.0210648	0.0234321	0.0234358	0.023931	0.0251719	0.0247959	0.0261233	0.020034	0.0206529	0.0187378	0.0207131	0.0175912	0.0177355	0.0316786	0.0308162	0.0271516	0.0285132	0.0390721	0.0343175	0.023534	0.0256433	0.0201839	0.0193064	0.022923	0.0230294	0.0161608	0.0180349
0.00735533	0.00668155	0.00544328	0.005317	0.00574088	0.00512338	0.00616908	0.00476159	0.00500907	0.00435299	0.00875559	0.0091835	0.00991821	0.00850641	0.00824558	0.00744718	0.0103895	0.0109597	0.00829167	0.00881195	0.0120396	0.0133775	0.00550074	0.00603371	0.00919903	0.00979208	0.00983728	0.0105379	0.010625	0.0103492	0.00903749	0.0140627	0.0140457	0.0158085	0.0115265	0.00870474	0.0177997	0.012947	0.0141599	0.0172825	0.00975023	0.0113296	0.0109599	0.0124287	0.00901561	0.00996626	0.0151423	0.0146452	0.00828768	0.0088609
0.0183499	0.0166664	0.0184582	0.0168502	0.0252988	0.0266518	0.0211649	0.0217939	0.0252523	0.0256775	0.0178358	0.0171243	0.0187218	0.0179155	0.0215844	0.0209354	0.017695	0.0183366	0.0186615	0.0164941	0.020812	0.0222936	0.0187361	0.0212939	0.0254307	0.0236949	0.0251631	0.0249461	0.0205756	0.0213199	0.0222878	0.0214985	0.0237131	0.0239841	0.0185259	0.016993	0.0224173	0.0155044	0.0236523	0.0249701	0.0324518	0.0273258	0.0220363	0.0224383	0.0210819	0.0171055	0.0240401	0.019664	0.0178611	0.0147213
0.0181773	0.0167967	0.020674	0.0199118	0.023308	0.0241131	0.0220666	0.0233352	0.0250795	0.0245354	0.0193229	0.0212159	0.0197823	0.0187916	0.0216167	0.0219445	0.0228967	0.0233955	0.0214409	0.0197692	0.026798	0.0275105	0.0203585	0.0232284	0.0241752	0.0246375	0.0220011	0.0231693	0.027228	0.0273704	0.0223036	0.0216813	0.0203734	0.0217714	0.0180753	0.01682	0.0311179	0.0301597	0.0274028	0.0280532	0.0369442	0.0335942	0.0237826	0.0234034	0.0210576	0.0222292	0.0233449	0.0213107	0.0179114	0.0197644
0.017892	0.0174155	0.0174811	0.017532	0.0232092	0.0224616	0.0204553	0.0217483	0.0242142	0.0238675	0.0164361	0.0185222	0.0178449	0.0182661	0.0193311	0.0198838	0.016205	0.018123	0.0161304	0.0157465	0.0274326	0.0213202	0.0188014	0.0205926	0.0238869	0.0226412	0.0231223	0.0223109	0.022457	0.0246606	0.0223726	0.0211983	0.0230684	0.0245742	0.0210237	0.0188984	0.0258066	0.0237455	0.027566	0.0294645	0.0380419	0.0349841	0.0190352	0.0196007	0.0177634	0.0202928	0.0240538	0.0215163	0.0181618	0.0185346
0.0186495	0.0171823	0.0176874	0.0170958	0.0232621	0.0224265	0.0201013	0.0215164	0.0227782	0.0242555	0.019006	0.0208915	0.0180295	0.0191275	0.0204742	0.0205231	0.0210843	0.0231245	0.0190346	0.0186682	0.0280523	0.0262269	0.018459	0.0205985	0.0237772	0.024545	0.0233219	0.0237621	0.025316	0.0259802	0.0223438	0.021194	0.0253244	0.026157	0.0213979	0.0168069	0.0280554	0.0275815	0.0280634	0.0278619	0.0381475	0.0329577	0.0203278	0.021149	0.0192863	0.0187563	0.0253114	0.0232369	0.0178695	0.0182151
0.00820807	0.00588427	0.00641733	0.00667174	0.00686321	0.00635993	0.00895686	0.00720915	0.00632132	0.00514774	0.0107946	0.0084143	0.0119534	0.00901956	0.0103578	0.00858023	0.010658	0.0117363	0.00841167	0.00941164	0.0136795	0.0136588	0.00628371	0.00702045	0.00983631	0.0116051	0.0111782	0.0123232	0.0112707	0.0119814	0.0109542	0.0160604	0.0153535	0.0170163	0.0136268	0.00833466	0.0163218	0.0137216	0.0145854	0.0210238	0.0121664	0.0137866	0.0151041	0.0156836	0.011824	0.0124033	0.0159599	0.0146166	0.0087803	0.0103892
0.0134597	0.0123255	0.010416	0.00976202	0.0101101	0.00889641	0.0128769	0.0108116	0.00940379	0.00726623	0.0141987	0.014756	0.015716	0.0130343	0.0130295	0.0107447	0.0177407	0.0172856	0.0145925	0.0143166	0.0197279	0.0203422	0.0108611	0.0116764	0.0153217	0.0170852	0.0158952	0.0171307	0.0187028	0.0167391	0.0185592	0.024245	0.0225777	0.0239815	0.0218675	0.0149497	0.0245542	0.021264	0.0223178	0.0268444	0.0171732	0.0178678	0.0205239	0.0202364	0.018645	0.0172737	0.0228771	0.0208915	0.0147953	0.0145366
0.0108955	0.00819122	0.00806319	0.00783006	0.00822117	0.00735072	0.0105397	0.00810983	0.00792141	0.00645702	0.0116903	0.0124206	0.0146437	0.0119241	0.0112205	0.00990345	0.0127534	0.0136433	0.00996062	0.0122296	0.014541	0.0152484	0.00859449	0.00878939	0.0111518	0.0135196	0.0117705	0.0133642	0.0142431	0.0151145	0.0142368	0.017936	0.0163752	0.0187456	0.0147011	0.0106824	0.0164265	0.0157443	0.016839	0.0221264	0.0130009	0.014763	0.0153864	0.0156804	0.0128235	0.0122019	0.0175271	0.0154204	0.00908628	0.011758
0.0174496	0.0170443	0.0209854	0.020073	0.0271099	0.0252446	0.0223461	0.0237167	0.0263719	0.0261379	0.019632	0.0200855	0.0186262	0.01943	0.0211837	0.0212142	0.0211863	0.0253077	0.0211927	0.019131	0.0276112	0.0279104	0.021154	0.0229658	0.0273207	0.0260567	0.0253178	0.0269944	0.0278141	0.029558	0.0229381	0.0240477	0.0254536	0.0275924	0.0212338	0.0185158	0.0299365	0.026941	0.0302071	0.028479	0.0404684	0.032845	0.0229175	0.023568	0.0219752	0.0217569	0.0234939	0.0202248	0.0170998	0.0186741
0.0121844	0.0102987	0.00932806	0.00961523	0.0105948	0.00902291	0.013035	0.0110037	0.00978312	0.00816303	0.0137024	0.0136217	0.0154758	0.0136124	0.0143625	0.0123111	0.015814	0.0147654	0.0149588	0.0124181	0.0187092	0.0166843	0.0119003	0.0112784	0.0153229	0.0167356	0.017224	0.016528	0.0204728	0.0187306	0.0207411	0.022039	0.0225961	0.0228538	0.0200277	0.0111287	0.0246486	0.0192761	0.0220278	0.0239903	0.0188723	0.0178736	0.0180968	0.016519	0.0168942	0.0150388	0.019539	0.0157797	0.0123931	0.0132211
0.0152726	0.014798	0.0175606	0.0180313	0.0225029	0.0243723	0.0206186	0.0215427	0.0233073	0.0244536	0.0190989	0.0195065	0.0183625	0.0194581	0.0215751	0.0216532	0.0197527	0.0235173	0.019817	0.017811	0.0264584	0.024066	0.0198942	0.0230208	0.0237816	0.0236215	0.0231705	0.0254266	0.0263498	0.0284291	0.020236	0.0207274	0.0210107	0.023116	0.0186606	0.016857	0.026895	0.0272158	0.0262168	0.0280295	0.0397761	0.0348019	0.0197612	0.0188761	0.0205724	0.0206937	0.0220261	0.0200159	0.0152367	0.0174765
0.0168245	0.0163106	0.0163074	0.0156402	0.021949	0.0211479	0.0198337	0.0215502	0.0209412	0.0222025	0.0162699	0.0184582	0.0172764	0.0173332	0.0169854	0.0189976	0.0186217	0.0201207	0.0166055	0.0169368	0.0195625	0.0217449	0.0155227	0.0186239	0.0194323	0.0213613	0.0226705	0.0238015	0.0204912	0.0232579	0.0191267	0.0199711	0.0211286	0.0236626	0.0180849	0.0179974	0.018249	0.0232579	0.0241866	0.0266483	0.0284076	0.0295848	0.0180252	0.0172977	0.0152741	0.0180932	0.0214427	0.0180734	0.0138313	0.0156802
0.0106482	0.00824097	0.00764323	0.00731185	0.00829523	0.00727558	0.0108025	0.00904017	0.00784472	0.00616541	0.0122551	0.012694	0.0134969	0.0114198	0.0119143	0.0096403	0.0158109	0.014842	0.00980362	0.0101039	0.016829	0.0166853	0.00819534	0.00854725	0.0125254	0.0132309	0.0134187	0.0139859	0.0160441	0.0147701	0.0160141	0.0198792	0.0176867	0.0201796	0.0152706	0.0110378	0.0205646	0.0135224	0.0188281	0.0211301	0.0145637	0.0145939	0.0160967	0.0171133	0.0139375	0.0138147	0.0190793	0.0168161	0.0107333	0.0123666
0.0117275	0.0107997	0.00859608	0.00872159	0.00833521	0.00766412	0.0103136	0.00949272	0.00790374	0.00669651	0.0121878	0.0125008	0.0137959	0.0113763	0.0111213	0.00933259	0.0159079	0.0169492	0.0116689	0.0134198	0.0156182	0.0158464	0.0089159	0.00976545	0.0123925	0.0136933	0.012874	0.0139497	0.0159022	0.0162442	0.0139279	0.018156	0.0182197	0.0209739	0.0163988	0.0116097	0.0188486	0.0175166	0.0164743	0.0214214	0.0131822	0.0138314	0.0156734	0.0172636	0.0138599	0.0148451	0.0182301	0.0184763	0.010504	0.0114216
0.0176778	0.0171946	0.0206423	0.0199154	0.0237802	0.022969	0.0242204	0.0244473	0.0239989	0.0240292	0.0197515	0.0213392	0.019682	0.0202805	0.0213156	0.0217582	0.02099	0.0246452	0.022071	0.0190852	0.0318347	0.0303699	0.0204723	0.0221912	0.0256316	0.0244283	0.0241834	0.0261625	0.0285353	0.0289645	0.0220629	0.0237373	0.027716	0.0283369	0.0206886	0.0184129	0.0297964	0.0302903	0.0307513	0.033006	0.0437152	0.0375028	0.0236818	0.0245248	0.0257942	0.0246116	0.0273132	0.02363	0.0222139	0.020578
0.021582	0.0218547	0.0208081	0.0184986	0.0266937	0.027756	0.0263307	0.0246367	0.0245959	0.0275124	0.0186066	0.0179604	0.020899	0.0187855	0.0213194	0.020158	0.0159952	0.0234555	0.0225036	0.0177522	0.028044	0.0283562	0.0174361	0.0204423	0.0231868	0.0264081	0.0252479	0.0264961	0.0252319	0.0262921	0.0265396	0.0266907	0.0279034	0.0312578	0.0314648	0.0295681	0.0266034	0.0250651	0.0306721	0.0324647	0.0407339	0.0359392	0.0245527	0.0229223	0.0267067	0.0230043	0.0278386	0.0237113	0.0273652	0.0217474
0.0156889	0.0129235	0.0123484	0.0116431	0.0112458	0.0106522	0.0150271	0.012513	0.0104113	0.00881281	0.0224587	0.0205805	0.0248117	0.0180598	0.019214	0.0153358	0.0236707	0.0231964	0.0144606	0.017359	0.021759	0.0200367	0.012768	0.0133236	0.0177065	0.0194351	0.0193692	0.0192735	0.0242107	0.0227433	0.0182565	0.0232504	0.0209776	0.0240156	0.0199038	0.0140172	0.0262175	0.023383	0.0262354	0.0300832	0.0223788	0.0227887	0.0171419	0.0192662	0.016692	0.0180235	0.021872	0.0213998	0.0141128	0.0154314
0.0136817	0.0143492	0.017386	0.0153141	0.0227749	0.0236687	0.019135	0.017911	0.0212179	0.0233467	0.0175279	0.0135046	0.0180429	0.0163173	0.0198209	0.0208027	0.0190864	0.0205277	0.0182857	0.0150218	0.0238786	0.0230879	0.0184144	0.0178789	0.024938	0.0240407	0.0242984	0.0249432	0.0208399	0.0223971	0.0220104	0.0205836	0.0220004	0.0223928	0.0189979	0.0177377	0.0254613	0.023478	0.0257692	0.0253132	0.0359718	0.0303197	0.0224742	0.0224193	0.0193107	0.0192793	0.0240587	0.0224658	0.0142257	0.0170681
0.0127913	0.00986941	0.00897438	0.00909897	0.00916737	0.00854768	0.0123089	0.0100908	0.00894006	0.00691537	0.0135849	0.0133206	0.0153943	0.0133016	0.0127668	0.01124	0.0177804	0.0159258	0.0136221	0.0138826	0.0171155	0.0172031	0.0108289	0.0106106	0.0138724	0.0158407	0.0147521	0.0152103	0.0186827	0.0179393	0.0186214	0.0221019	0.0212685	0.0229503	0.0182575	0.0128557	0.0250455	0.0199499	0.0228179	0.0248885	0.0182004	0.0182406	0.0175509	0.0173057	0.0157603	0.0150948	0.0210807	0.0191383	0.0121352	0.0128275
0.0146982	0.0140172	0.0158399	0.0167052	0.0225773	0.0229318	0.0169748	0.019175	0.021379	0.0223109	0.0172859	0.0179027	0.016161	0.0181453	0.0190851	0.0188196	0.0182715	0.0198952	0.0177228	0.0156027	0.0177302	0.0175516	0.0173086	0.0183735	0.0214943	0.020717	0.0215532	0.0216719	0.0206548	0.0197361	0.0181776	0.0181292	0.0210948	0.0213707	0.0196479	0.0178598	0.0228018	0.0188587	0.0236656	0.022932	0.0299148	0.0247564	0.0179339	0.0195001	0.0168737	0.0168534	0.0223773	0.0202026	0.0162414	0.0154673
0.0226653	0.0193256	0.021142	0.0203896	0.0278635	0.0270143	0.0239541	0.0261719	0.0282768	0.02916	0.0232208	0.0244352	0.0230199	0.025417	0.0265346	0.0268912	0.024188	0.0280102	0.0228122	0.0178796	0.0324838	0.0333198	0.0218142	0.0237677	0.0301798	0.0297513	0.0304756	0.0300799	0.02801	0.028489	0.0299067	0.0294079	0.0270221	0.0278868	0.0239696	0.0232947	0.0333108	0.0335278	0.0340463	0.0334559	0.0405266	0.0374345	0.0261871	0.026087	0.0249146	0.0245452	0.0288896	0.0271553	0.0199124	0.0201649
0.00882384	0.00756281	0.00798191	0.00791183	0.00798252	0.00744538	0.0096506	0.0076503	0.00728799	0.00618789	0.0111929	0.0118973	0.0138418	0.0112413	0.011959	0.00963669	0.0131391	0.0127739	0.0110729	0.0120236	0.0143807	0.0140574	0.00853752	0.00881012	0.0116428	0.0134912	0.0125771	0.0137501	0.0155776	0.0137806	0.0148796	0.0189099	0.0176516	0.0206853	0.0156607	0.00973284	0.0177732	0.0137726	0.0158486	0.0194483	0.012551	0.0125	0.0148791	0.0141558	0.0125132	0.0132369	0.0186177	0.0165714	0.0100193	0.0121283
0.0175851	0.0155559	0.0202373	0.0210982	0.0253208	0.02454	0.0209997	0.0223666	0.0214922	0.0250879	0.0183856	0.0195946	0.0171337	0.0170563	0.0213972	0.0215946	0.0210343	0.0209267	0.0223377	0.0190468	0.0288051	0.0272936	0.0210253	0.0237189	0.0261803	0.0269824	0.0264198	0.0260555	0.0241805	0.0243351	0.0254576	0.0253731	0.0236601	0.0243318	0.0195689	0.0191991	0.0280249	0.0274251	0.0286281	0.0293561	0.0362646	0.0339513	0.020724	0.0207434	0.0187599	0.018703	0.0250389	0.0204638	0.0160759	0.0153069
0.00936708	0.00848155	0.00785362	0.00794864	0.00814617	0.00745414	0.0100062	0.00863937	0.00723767	0.00642737	0.0123342	0.0114638	0.0125992	0.011231	0.0106348	0.00967223	0.0142101	0.0134024	0.0104836	0.0126072	0.0153609	0.0152292	0.00832054	0.0092374	0.0119141	0.013465	0.01333	0.0142839	0.0169477	0.0160908	0.0155113	0.0194638	0.0175658	0.0212206	0.0149506	0.0103709	0.021095	0.0180626	0.0185439	0.022747	0.0142034	0.0153143	0.0141704	0.0144399	0.0134627	0.0131329	0.0175278	0.0156463	0.0102989	0.0119354
0.00855668	0.00727689	0.00697175	0.00680449	0.00752282	0.00621594	0.00825203	0.00652612	0.00617111	0.00502987	0.0109292	0.0102404	0.0118332	0.0104058	0.00996506	0.00850954	0.0139365	0.0133431	0.00850329	0.0098112	0.0151634	0.0144261	0.00712261	0.00681528	0.0110731	0.012583	0.0119055	0.0123886	0.0148017	0.0141685	0.0121848	0.0156041	0.015282	0.0171814	0.0129056	0.00931704	0.0186766	0.0135851	0.0154613	0.0192697	0.0109898	0.0115588	0.0140303	0.0143978	0.0125357	0.0127597	0.0173171	0.0159899	0.0100464	0.0106387
0.014496	0.012792	0.0109447	0.0115123	0.0112783	0.0100972	0.0144422	0.012035	0.010546	0.00846427	0.0153114	0.0154723	0.0177203	0.0149055	0.0160916	0.0130467	0.0193322	0.0190551	0.0166969	0.0176536	0.019894	0.0192811	0.0124923	0.0114977	0.0163996	0.0178014	0.0165762	0.0180055	0.0227672	0.0228531	0.0219565	0.0233056	0.0243463	0.0241261	0.0204543	0.0139428	0.0278988	0.0220084	0.025897	0.027248	0.0202688	0.0193476	0.0203396	0.0184837	0.0179721	0.0168241	0.02337	0.020947	0.0131497	0.017347
0.0147005	0.0134145	0.0172541	0.0155478	0.0232933	0.0211084	0.0186748	0.0192713	0.0224413	0.0231328	0.018125	0.0180133	0.0176551	0.0174591	0.0184469	0.0195484	0.0207985	0.0229308	0.0171128	0.0148118	0.0269327	0.0263619	0.0172469	0.0191137	0.0235378	0.023155	0.0222162	0.0241786	0.0253821	0.0252994	0.020341	0.0213114	0.0228673	0.0221776	0.019143	0.0160839	0.0276179	0.0266943	0.0255204	0.0273414	0.0362409	0.033714	0.0235148	0.0234943	0.0221624	0.0192764	0.0237142	0.0198012	0.0187746	0.0169799
0.0177093	0.0163091	0.017945	0.0171925	0.0216774	0.0224881	0.0197366	0.0213649	0.0223831	0.0231984	0.0180227	0.0191144	0.0174021	0.0176302	0.0185561	0.0204503	0.0196307	0.0216698	0.0190673	0.0162401	0.0289554	0.0252586	0.0174944	0.019027	0.0248835	0.0247139	0.0253896	0.0269182	0.0223676	0.0233183	0.0224572	0.0219027	0.0217511	0.0233777	0.019783	0.0193492	0.0255324	0.0244385	0.0279118	0.0282988	0.0362189	0.0349634	0.0236135	0.0233637	0.0230385	0.0235257	0.0268129	0.021856	0.0180183	0.0174438
0.0109115	0.00916476	0.00948626	0.0084574	0.0095743	0.00893014	0.0119226	0.00922885	0.00858397	0.00719586	0.0131995	0.0119393	0.0152661	0.0118366	0.0131151	0.0111992	0.0146293	0.014497	0.0128092	0.0129434	0.016325	0.0153106	0.00978625	0.00963856	0.0127557	0.0149642	0.0141938	0.0162281	0.0177491	0.0172382	0.0174442	0.019984	0.0192521	0.0196522	0.0150014	0.010529	0.0200308	0.0152484	0.0195022	0.0226224	0.0142164	0.0149603	0.0160206	0.0150232	0.0138688	0.0136743	0.0199784	0.0167008	0.0119144	0.012467
0.0116188	0.00978463	0.00928465	0.00877188	0.00917756	0.00859045	0.0112023	0.00932019	0.00879854	0.00703965	0.0126796	0.01372	0.0147259	0.0119952	0.0124845	0.0107796	0.0172437	0.0160235	0.0118911	0.0137503	0.0178582	0.0177567	0.010485	0.0105758	0.0152058	0.0167245	0.0132952	0.0144618	0.0191793	0.0182157	0.0166216	0.0220387	0.0178994	0.0212973	0.0186973	0.0126028	0.0249834	0.0202338	0.0213458	0.0262	0.0167435	0.018801	0.0175796	0.0165694	0.0172142	0.0163638	0.0225842	0.0198635	0.0131105	0.0146846
0.0169405	0.0143316	0.0161062	0.0168666	0.0211926	0.0232937	0.0193542	0.0204336	0.0219321	0.024279	0.0192932	0.0178117	0.0184972	0.0168914	0.0212335	0.020794	0.021036	0.0206951	0.0196151	0.0184228	0.0274625	0.0254067	0.017945	0.0214019	0.0229155	0.022583	0.0229151	0.024801	0.0231707	0.0227869	0.0206986	0.0204659	0.0230665	0.0236322	0.0225301	0.0188165	0.0266759	0.023756	0.0269209	0.0273106	0.036774	0.0320284	0.0201715	0.0207523	0.020432	0.0201643	0.0234545	0.0203382	0.0177204	0.0192098
0.0172297	0.0166767	0.0203272	0.0218822	0.0261534	0.0269156	0.0234869	0.0264061	0.0271435	0.0288615	0.0192672	0.0230272	0.0203754	0.0222782	0.022649	0.0241705	0.0253984	0.0272108	0.0215112	0.0225527	0.030708	0.0305421	0.0232118	0.0270584	0.0283629	0.028274	0.0276302	0.0276609	0.0297204	0.0315835	0.0252939	0.0259072	0.0229118	0.0270063	0.0194151	0.0195534	0.0326566	0.031974	0.0297615	0.0302679	0.037839	0.0324878	0.0307035	0.031296	0.0247292	0.0268065	0.0272505	0.0259725	0.0211527	0.022591
0.0155092	0.0134718	0.0174615	0.0174961	0.0258364	0.024443	0.0203783	0.0197641	0.0229121	0.0232192	0.0203716	0.0175925	0.0167305	0.0164736	0.0196364	0.0200036	0.0182392	0.0230681	0.0169807	0.0155757	0.0267093	0.0263629	0.0187365	0.0203048	0.0242894	0.0257482	0.024483	0.0254091	0.0249948	0.0292496	0.0228429	0.0237	0.0207021	0.0220206	0.0207452	0.0196477	0.0277887	0.0256826	0.025866	0.0275879	0.0364238	0.0324228	0.0199243	0.0201479	0.0170615	0.0184915	0.0231207	0.0183229	0.0171211	0.0179572
0.0200541	0.0185784	0.0232884	0.0217713	0.0283315	0.0282996	0.0248639	0.024768	0.0292047	0.0270772	0.0224216	0.0218154	0.0216482	0.0203312	0.0255457	0.0245	0.023355	0.0264264	0.0221637	0.0196999	0.0276291	0.0277718	0.0243246	0.0263118	0.0299085	0.0281635	0.0292273	0.0293321	0.0280892	0.028447	0.0282391	0.0274598	0.0270241	0.0293578	0.0251697	0.0252022	0.0268816	0.0244241	0.0288418	0.0304618	0.0372499	0.0350343	0.0270008	0.0269739	0.0237683	0.0231718	0.0273528	0.0221361	0.0219476	0.0193401
0.0193325	0.0200197	0.0194569	0.021	0.027044	0.0272171	0.022024	0.0243417	0.0247696	0.0257055	0.0182739	0.0203501	0.0190191	0.0201078	0.0217924	0.0227881	0.0189653	0.0227817	0.0215689	0.0203924	0.0276177	0.0241922	0.0215189	0.0235987	0.0280159	0.0288334	0.0245979	0.0255493	0.0230284	0.0260049	0.0276267	0.0280316	0.0288968	0.0300721	0.0250281	0.0234491	0.01989	0.0202141	0.0296425	0.0288462	0.0367775	0.0309705	0.0255185	0.0265495	0.0246195	0.0216629	0.0275582	0.0229445	0.0209863	0.0200061
0.0177661	0.0178022	0.019635	0.0197023	0.022987	0.0232558	0.0216237	0.0232934	0.0219244	0.0231047	0.0202874	0.0197429	0.0196162	0.0200029	0.021332	0.0224414	0.0195741	0.0207276	0.018277	0.0189846	0.0313073	0.023132	0.0203813	0.0227064	0.0249634	0.0248341	0.0253438	0.0261998	0.0228187	0.0253454	0.0267696	0.0243516	0.0224754	0.0244509	0.0228114	0.0189609	0.0302171	0.0280997	0.0299299	0.0285935	0.037743	0.0327551	0.026147	0.0262024	0.0246978	0.0242889	0.027642	0.0240622	0.021554	0.0203418
0.0091394	0.0081139	0.00806523	0.00806991	0.00776454	0.00752388	0.00948499	0.00800066	0.00705454	0.00635046	0.0113418	0.0108272	0.0129981	0.0104999	0.0118721	0.0102224	0.0136441	0.0133746	0.0127457	0.0123305	0.0153054	0.0147393	0.00946095	0.00938873	0.0130199	0.0151132	0.0135531	0.0141835	0.015021	0.014047	0.0145491	0.0184843	0.015501	0.0176071	0.0129033	0.0103633	0.0218109	0.0165744	0.0209057	0.0224061	0.0136523	0.0150105	0.0154996	0.014697	0.0136172	0.0136629	0.0188693	0.0170432	0.00991749	0.0106242
0.0167594	0.0155452	0.0187652	0.0186724	0.024309	0.0229828	0.0210872	0.024225	0.0256899	0.0273762	0.0171031	0.0198163	0.0189128	0.0188767	0.0213061	0.0232351	0.0174237	0.0216012	0.0192277	0.0177189	0.0256541	0.0242104	0.0199676	0.0221502	0.0241031	0.0221097	0.0230809	0.0239603	0.0228078	0.0245177	0.022515	0.0205361	0.0230831	0.0226185	0.0213018	0.0206048	0.0200756	0.0219649	0.0240521	0.0270811	0.0297948	0.0297592	0.0233905	0.0232023	0.0223508	0.0211385	0.0242267	0.0216194	0.0168567	0.0190858
0.0143058	0.0159354	0.0184233	0.0175274	0.0222241	0.0223907	0.0200349	0.0204354	0.0227578	0.0243842	0.0181236	0.0195541	0.0166576	0.0180718	0.0184032	0.0200667	0.0207343	0.0208079	0.0192479	0.0163208	0.0262368	0.0231685	0.0198933	0.0210537	0.0246514	0.023011	0.0218058	0.0244463	0.0243837	0.0251949	0.0205863	0.0196702	0.0194152	0.0207213	0.0163266	0.0155813	0.0272452	0.0272342	0.0240111	0.0239623	0.0353278	0.0326918	0.0227443	0.0236111	0.0210142	0.0205064	0.0204937	0.0199534	0.0160181	0.016461
0.0120059	0.0100745	0.00831962	0.00806301	0.00877158	0.00802423	0.0116066	0.00931135	0.00831532	0.00691368	0.014601	0.014438	0.0162099	0.0131164	0.0126839	0.0111357	0.0154451	0.0143479	0.0118616	0.0118045	0.0163155	0.0162518	0.00927841	0.00956356	0.012409	0.0136003	0.0136559	0.0152193	0.0169163	0.0164017	0.0162931	0.018364	0.0195087	0.0195021	0.0176624	0.0113918	0.0193472	0.0159567	0.0174661	0.023144	0.0146822	0.0162167	0.0156872	0.0153503	0.0145836	0.0139041	0.0192143	0.0179671	0.0108438	0.0117394
0.0183422	0.0190621	0.0198979	0.0200244	0.0266598	0.0267504	0.0221184	0.0254918	0.0266794	0.0284455	0.0195283	0.0211034	0.0195273	0.0203674	0.0231843	0.0250997	0.0223166	0.0257021	0.0226904	0.020751	0.0318685	0.030424	0.0215884	0.0254345	0.0291402	0.0307057	0.0300243	0.0301491	0.0280855	0.0267485	0.0303438	0.0269985	0.0261369	0.0286153	0.0262125	0.0233297	0.0269771	0.025254	0.0287199	0.0287733	0.0398003	0.0325909	0.0248897	0.0259313	0.0249823	0.0222948	0.0273186	0.0229162	0.0205571	0.0191548
0.0110052	0.009163	0.00900996	0.00955693	0.00915736	0.00827858	0.0115795	0.00911876	0.00833362	0.00681177	0.0124158	0.0121098	0.0146461	0.0115891	0.0125737	0.0100975	0.0149304	0.0144019	0.0105706	0.0132973	0.018259	0.0181405	0.00860519	0.0100178	0.0133146	0.0147582	0.0143394	0.0152988	0.0184384	0.0165666	0.0174726	0.0209615	0.020865	0.0227319	0.0177307	0.0126922	0.0268056	0.0214591	0.021252	0.0269072	0.0187915	0.0194029	0.016657	0.0179707	0.0152379	0.0149882	0.0187692	0.0183265	0.0122485	0.0134534
0.0158425	0.0160409	0.0165587	0.0164981	0.0204137	0.0203612	0.0181051	0.0196771	0.0189877	0.0185705	0.0151231	0.0154281	0.015929	0.0163144	0.0174815	0.0170221	0.0165152	0.0176491	0.0172743	0.0163852	0.0248858	0.0220443	0.0155279	0.0174606	0.0203666	0.0199226	0.0199776	0.0207645	0.0205876	0.0213574	0.0205591	0.0207033	0.0219319	0.0229085	0.0178441	0.0183102	0.0256832	0.0220938	0.0232271	0.0254242	0.0315885	0.0292511	0.0187958	0.0200619	0.0165708	0.0165936	0.0248368	0.0217682	0.0150598	0.0146181
0.0160161	0.0136448	0.0194436	0.017652	0.0213227	0.0217148	0.0191614	0.020715	0.0214807	0.022152	0.0178976	0.018669	0.017293	0.0174768	0.0215051	0.0223285	0.0202121	0.0209964	0.0217532	0.0189724	0.0252197	0.0258635	0.0199637	0.0217935	0.0220481	0.0229111	0.0204565	0.0206445	0.0276044	0.0274864	0.0221012	0.0223114	0.0205566	0.021566	0.0172061	0.017455	0.0299169	0.0283493	0.0277164	0.027326	0.0370698	0.0353027	0.024046	0.0222607	0.0238677	0.0229014	0.02387	0.0223757	0.0177765	0.0187944
0.0178335	0.0181945	0.0196946	0.0198471	0.0248385	0.0244229	0.021283	0.022775	0.0238027	0.024488	0.0185537	0.0202756	0.0185974	0.0177392	0.0203428	0.0199066	0.0204305	0.0239481	0.0206446	0.0191551	0.0262091	0.0233286	0.0205748	0.0227529	0.0268165	0.0258515	0.0255616	0.0274127	0.0251279	0.0271307	0.0253429	0.0234908	0.0247763	0.0265242	0.0252487	0.0240324	0.0260874	0.0265302	0.0251693	0.0278701	0.035366	0.0354817	0.0231821	0.0229263	0.0206258	0.0203448	0.0246747	0.0226002	0.0188974	0.0180841
0.011168	0.00970083	0.00860207	0.00842442	0.00947086	0.00820493	0.0111662	0.00940608	0.00830899	0.00713979	0.0124628	0.0128907	0.013879	0.0114566	0.0120324	0.009996	0.0166233	0.0152059	0.0123631	0.0141527	0.0166748	0.0164596	0.00977134	0.00979274	0.0133387	0.015211	0.0147127	0.0160227	0.0170825	0.0169049	0.0174594	0.0205079	0.0183313	0.0210134	0.01689	0.0120233	0.0219459	0.0173855	0.0213709	0.0249563	0.0147646	0.0159555	0.0152126	0.015175	0.0138779	0.012784	0.0192572	0.0181175	0.0117806	0.0111192
0.013556	0.0129326	0.015777	0.0166727	0.0198738	0.0207472	0.0186753	0.0200633	0.019384	0.0198447	0.0161197	0.0169767	0.0157805	0.0161806	0.0179176	0.0180224	0.0147545	0.0186271	0.0158055	0.0130137	0.0207637	0.0202445	0.017209	0.0178181	0.0220788	0.0220705	0.0219477	0.0237673	0.0201926	0.0220209	0.0208543	0.020325	0.02079	0.02182	0.0168921	0.0153957	0.0240526	0.0202836	0.0251501	0.0241562	0.0317941	0.0274172	0.015742	0.0170255	0.0145958	0.0136179	0.0217534	0.0170218	0.0140013	0.0146611
0.0116309	0.0103555	0.00941025	0.00961385	0.00987427	0.00874009	0.0116158	0.00917295	0.00857577	0.0070192	0.0129646	0.0122656	0.0142452	0.0112545	0.0122948	0.0103138	0.0162757	0.0160986	0.0139703	0.0152552	0.0190628	0.0186794	0.0106367	0.0104331	0.0147577	0.0166884	0.0164968	0.0171379	0.0195494	0.01876	0.0187356	0.0219621	0.0192355	0.0207809	0.0160397	0.0116395	0.0254799	0.0190325	0.0233396	0.0257426	0.0183991	0.0185892	0.0208586	0.0208052	0.01809	0.0166461	0.0220044	0.0191647	0.0133967	0.0139605
0.0134394	0.0103517	0.0100497	0.00968541	0.00949924	0.00874741	0.0136599	0.0101121	0.00890092	0.00691763	0.0152702	0.0144462	0.018311	0.0130927	0.0135225	0.0103942	0.0159845	0.0159312	0.013476	0.0160707	0.0189854	0.0186205	0.0101937	0.0114205	0.0150024	0.0172105	0.0157537	0.0163291	0.0181443	0.01676	0.0178628	0.0221669	0.0218404	0.0250263	0.0171003	0.0119632	0.0229665	0.0174629	0.0204318	0.0254132	0.0157226	0.016301	0.0175964	0.0184646	0.0162456	0.0168167	0.0217303	0.0198477	0.0126174	0.0136432
0.0162088	0.014953	0.0139433	0.0134766	0.0185362	0.017244	0.0160565	0.0167803	0.0183711	0.0183805	0.0168254	0.0169464	0.0154269	0.0144958	0.0153548	0.0150435	0.0179007	0.0177858	0.0176508	0.0157872	0.0222414	0.021847	0.014395	0.0157658	0.0192023	0.017429	0.0183457	0.0193028	0.0222036	0.0208498	0.0165922	0.0156347	0.0189031	0.0193372	0.0164735	0.0127649	0.0230695	0.0214039	0.0226433	0.0226815	0.0309834	0.0260472	0.018994	0.0173403	0.0158219	0.0160631	0.0204575	0.0177388	0.0134977	0.0149684
0.00932921	0.00787476	0.00778304	0.00745613	0.00813459	0.00706054	0.0096488	0.00719411	0.00737252	0.00607267	0.011655	0.0105516	0.0133119	0.00973164	0.0113224	0.00889458	0.013374	0.0127584	0.00983265	0.010567	0.0157188	0.0155772	0.00834442	0.00818882	0.0114334	0.0125882	0.0118793	0.0134448	0.0143504	0.0136725	0.0141886	0.0183102	0.0185265	0.0201721	0.0149394	0.0110453	0.01798	0.0139701	0.0173898	0.0208967	0.0140944	0.0143691	0.0134487	0.0134547	0.0118317	0.0107754	0.0179697	0.0152868	0.0105193	0.0104744
0.00998892	0.00824958	0.0081017	0.0086855	0.00829781	0.00767819	0.0108862	0.00854743	0.00764775	0.00611959	0.0120165	0.0119077	0.0144149	0.0118861	0.0118837	0.0102163	0.014224	0.0133331	0.0107577	0.0125545	0.0150764	0.0148718	0.00870859	0.00945068	0.0119886	0.0135662	0.0137189	0.0135283	0.0180941	0.0170036	0.0154623	0.0189586	0.0162336	0.0175113	0.0124491	0.00906866	0.0211414	0.018544	0.0176669	0.0222957	0.014571	0.0158645	0.0156922	0.015066	0.012863	0.0118288	0.0181335	0.016059	0.00980687	0.0095098
0.00968012	0.00819472	0.00742031	0.00741602	0.00753164	0.00713448	0.00963205	0.00741241	0.00749654	0.00611985	0.0116554	0.011045	0.0136761	0.0109687	0.0111871	0.00931928	0.0137324	0.0133556	0.00953618	0.011027	0.0147202	0.0144037	0.0069951	0.00767472	0.0112964	0.0117495	0.0121779	0.0133887	0.0154468	0.0125713	0.0128072	0.0162865	0.0152815	0.0186823	0.0156373	0.0100273	0.0214549	0.0162694	0.016415	0.0208883	0.0133622	0.0147884	0.0151661	0.0152773	0.0127766	0.0123393	0.0175315	0.0159464	0.00981444	0.0105517
0.0167425	0.0167594	0.0181961	0.0191829	0.0206631	0.0217177	0.0195931	0.0228695	0.024599	0.0232638	0.017491	0.0191616	0.0174863	0.017104	0.0182451	0.0178079	0.0178766	0.0203811	0.0214257	0.0185771	0.0247174	0.0238718	0.0206332	0.0236665	0.0241818	0.0237275	0.022307	0.0232188	0.0244188	0.0243485	0.0219487	0.0214455	0.0215377	0.0218407	0.0166756	0.0173624	0.0243252	0.0239503	0.025752	0.0270496	0.0363178	0.0340337	0.0193103	0.0199568	0.0163954	0.0180573	0.0207457	0.0187867	0.0113637	0.0141049
0.0175288	0.0175148	0.0183105	0.0174085	0.0212681	0.0228682	0.0193063	0.0219161	0.0214279	0.0222515	0.0179688	0.0191912	0.0188923	0.0196917	0.019212	0.0190282	0.0198703	0.0227937	0.0183422	0.0168968	0.020412	0.0222663	0.0171869	0.0191902	0.0224304	0.0236028	0.0238641	0.0236956	0.0185736	0.0222085	0.0253582	0.0259551	0.0283779	0.0274524	0.0258888	0.0223748	0.0180954	0.0178124	0.0188927	0.0211767	0.0254583	0.0234104	0.0214077	0.0222752	0.0189689	0.0208151	0.0234964	0.0205319	0.0174017	0.0162112
0.0140942	0.0116542	0.0140723	0.0141959	0.0196779	0.0185184	0.0165415	0.0164962	0.0181593	0.0199206	0.0157904	0.0160546	0.0150522	0.0150625	0.0157804	0.0156806	0.0160824	0.0165952	0.0155813	0.0143338	0.0183559	0.0178482	0.0159072	0.0171495	0.0181345	0.0187263	0.0190258	0.019577	0.0198141	0.0196227	0.0172027	0.016243	0.0188059	0.0184126	0.0148801	0.0134543	0.020129	0.0196106	0.0207834	0.0234393	0.030698	0.0268772	0.0157437	0.016618	0.0144373	0.0165974	0.0183033	0.0158299	0.01287	0.0133564
0.0155487	0.0139886	0.0180694	0.016812	0.0210756	0.0225419	0.020873	0.0201625	0.0226574	0.022669	0.0189579	0.0169414	0.0184053	0.0181027	0.0190099	0.0199645	0.0188294	0.0214389	0.0185793	0.0152646	0.0237441	0.0222104	0.0197755	0.0213943	0.023871	0.0236869	0.021983	0.0221535	0.0246931	0.0246708	0.0214276	0.0214459	0.0219106	0.0225119	0.0187526	0.0166322	0.028409	0.0266675	0.0264294	0.026319	0.0338999	0.0307796	0.0214394	0.0208832	0.0192974	0.0196096	0.022567	0.0188932	0.0146664	0.0177687
0.0196605	0.0176732	0.0218079	0.0215442	0.0285608	0.0267461	0.024466	0.0245873	0.0282732	0.0297569	0.022492	0.0244284	0.0224312	0.0215169	0.0243774	0.0264547	0.0276427	0.0281802	0.0246566	0.0238139	0.0346116	0.0318565	0.0234683	0.0264229	0.033338	0.0314391	0.0325047	0.0329506	0.0322324	0.0316433	0.0257491	0.0263301	0.0264734	0.026945	0.0212038	0.0214833	0.0354325	0.0338919	0.0292331	0.0307346	0.0405021	0.0379533	0.0293749	0.0285163	0.0266666	0.0258193	0.0260863	0.0238485	0.020951	0.0212833
0.0108731	0.00917962	0.00845532	0.00738577	0.00820001	0.00735932	0.0102309	0.00888795	0.00712661	0.00572902	0.0116459	0.0132249	0.0147249	0.0120133	0.0116292	0.0101328	0.0146634	0.0132629	0.0100812	0.0106001	0.0157607	0.0154158	0.0080524	0.0082693	0.0127575	0.0148996	0.0129439	0.0142952	0.017086	0.016325	0.0149614	0.0196484	0.0170906	0.0183096	0.0164783	0.0112949	0.0202098	0.0159413	0.0167691	0.0233169	0.0140474	0.0147777	0.016054	0.0154904	0.0135703	0.0138151	0.0187675	0.0170455	0.0104536	0.0105988
0.0207636	0.0176976	0.0207625	0.0196268	0.0258158	0.0257335	0.0244964	0.024377	0.028633	0.0285041	0.0226332	0.0238499	0.0216733	0.0201504	0.0235914	0.0234612	0.0253675	0.0261857	0.0237623	0.0213405	0.0286799	0.0280397	0.0222792	0.0243498	0.0279565	0.0276002	0.0274852	0.0286155	0.0296138	0.0284656	0.0248065	0.0260655	0.0279797	0.0285147	0.0185182	0.017182	0.0302971	0.0285459	0.0295831	0.0303795	0.0390923	0.0348968	0.0261748	0.0273268	0.0249928	0.0247478	0.0261227	0.0247075	0.0216309	0.0213811
0.0164035	0.0151223	0.0182298	0.0169763	0.0235945	0.022994	0.0200381	0.0204209	0.0227836	0.0229489	0.0173653	0.017863	0.0178078	0.017355	0.0181063	0.0186294	0.0206403	0.0232829	0.0203484	0.017456	0.0228731	0.0239943	0.0185825	0.020815	0.0240391	0.0227349	0.0222955	0.0242369	0.024783	0.025321	0.0170985	0.0181973	0.0199382	0.0211835	0.0147408	0.0138136	0.0283973	0.0267728	0.0248221	0.0253027	0.0365555	0.0322658	0.0192858	0.0190073	0.016805	0.0174188	0.0211192	0.018377	0.0143628	0.0159352
0.015143	0.0147525	0.0170336	0.0176392	0.0259449	0.0255284	0.01934	0.0209281	0.0247538	0.0273259	0.0192663	0.0202874	0.0185257	0.0186492	0.0213429	0.0225171	0.0233176	0.0251151	0.0201547	0.016778	0.0292831	0.0262501	0.0206295	0.023844	0.0266524	0.0280286	0.0264408	0.0282246	0.02687	0.0272391	0.0236648	0.0225392	0.0211434	0.021922	0.0178785	0.0180499	0.0280527	0.0288829	0.0273642	0.0294445	0.0362253	0.0352306	0.0201064	0.0227078	0.0172047	0.0200304	0.0230723	0.0225493	0.0129896	0.0149279
0.0219264	0.0205336	0.0231599	0.0228315	0.0285937	0.0269031	0.0263258	0.0265347	0.0282865	0.0294414	0.0244432	0.0238671	0.023682	0.024151	0.0260038	0.0257479	0.0280458	0.0295123	0.0244003	0.0238093	0.0324059	0.0316819	0.0235755	0.027998	0.0324585	0.031217	0.0323312	0.0331219	0.0314816	0.0321204	0.0265912	0.0289485	0.0275668	0.0305706	0.0227745	0.0221963	0.0311801	0.0309772	0.0286949	0.031196	0.0387564	0.0355239	0.0322008	0.0307025	0.0267741	0.0269028	0.0279591	0.0252598	0.0206693	0.0210604
0.0206309	0.0198797	0.0212236	0.0191717	0.0244799	0.0228207	0.0258249	0.0254395	0.0256697	0.0236592	0.0194252	0.0213584	0.0202297	0.0199801	0.02405	0.0230642	0.0201473	0.0232465	0.0204305	0.0205518	0.0341673	0.0331388	0.0175619	0.0213484	0.0239468	0.0254414	0.0258979	0.0278787	0.0273286	0.0282723	0.0255948	0.026381	0.0273986	0.0317002	0.0262119	0.0233855	0.0262779	0.0248802	0.026895	0.0307458	0.0374223	0.0338123	0.0215409	0.0206192	0.0221791	0.0202171	0.024811	0.0208939	0.0199646	0.0169637
0.010308	0.00903135	0.0082366	0.00816949	0.00825972	0.00728125	0.0108504	0.00886797	0.00771456	0.00620891	0.011868	0.0120501	0.0136233	0.0111315	0.0106648	0.00934373	0.014418	0.0144552	0.0102429	0.0118412	0.015766	0.0151347	0.00886072	0.00914456	0.0122282	0.0136714	0.0127509	0.0140842	0.0169231	0.0145606	0.0159629	0.0191698	0.018639	0.0199846	0.0153164	0.0106752	0.0194608	0.0140767	0.0175654	0.0218162	0.0131202	0.015259	0.0139218	0.0155427	0.0112347	0.0121176	0.0166771	0.016189	0.00938794	0.0104717
0.0141667	0.0134157	0.0169431	0.0174706	0.0227668	0.0205341	0.0182385	0.0201574	0.0211267	0.0208746	0.0169763	0.0151918	0.0160653	0.0165592	0.018902	0.0184534	0.0140077	0.0171422	0.0175336	0.015442	0.0263566	0.0218838	0.017944	0.020203	0.0210895	0.0211638	0.0220365	0.0213871	0.0192257	0.0198856	0.0189242	0.0176876	0.0179804	0.0187024	0.0155328	0.0141255	0.0197475	0.0174082	0.0238551	0.0222101	0.0308375	0.0243812	0.0202115	0.0211107	0.018515	0.0178955	0.0201547	0.0187869	0.0159591	0.0167182
0.0109462	0.00911512	0.00849937	0.00719954	0.00802534	0.00754748	0.0102049	0.00793326	0.0078	0.00619435	0.013033	0.0118684	0.0140312	0.0113117	0.0119375	0.0101874	0.0152861	0.0163501	0.0108057	0.0130014	0.0170164	0.0169813	0.00908543	0.0092944	0.0133981	0.0149919	0.0151208	0.0153807	0.0162384	0.016078	0.0147002	0.0189615	0.0181958	0.0213963	0.0173827	0.0128971	0.0222161	0.0152818	0.0220785	0.0246423	0.0142315	0.0145927	0.0161639	0.0165049	0.0136751	0.0149811	0.0205537	0.0189341	0.0108872	0.0123651
0.015653	0.0150017	0.0183216	0.0174091	0.022245	0.0221497	0.0205319	0.0227789	0.0220916	0.0219339	0.0182141	0.0203929	0.0163855	0.0172607	0.0170843	0.0173688	0.0193056	0.0205434	0.0207468	0.0177018	0.0241954	0.0239028	0.0195421	0.0213718	0.0226692	0.0207106	0.0223149	0.0212086	0.0245905	0.02319	0.0205672	0.0203838	0.0225175	0.0248629	0.0180319	0.015387	0.0256331	0.0212987	0.025184	0.0249962	0.0331592	0.0267447	0.0188873	0.0187093	0.0178902	0.0182945	0.0218724	0.0198097	0.0135692	0.0157981
0.0140454	0.0124107	0.0140276	0.0146313	0.0187671	0.0175751	0.0161821	0.0169386	0.0181513	0.0180651	0.0148913	0.014522	0.0148883	0.0140185	0.015142	0.0149674	0.0134644	0.0154493	0.0147884	0.0130807	0.0213736	0.018895	0.0147934	0.0156685	0.0183226	0.0177766	0.0170429	0.0194028	0.0185562	0.0187385	0.0161682	0.0143584	0.017836	0.0180945	0.0158028	0.0145388	0.0186136	0.0170876	0.0192422	0.0215385	0.0283348	0.027512	0.017449	0.0175141	0.0147714	0.0153074	0.0193794	0.0161256	0.0133741	0.0126327
0.015836	0.0121935	0.0136202	0.0121102	0.0191683	0.0178573	0.0183611	0.0169841	0.0206067	0.0217334	0.0172457	0.0157841	0.0179566	0.0153895	0.0165405	0.0175096	0.0160577	0.017713	0.0144676	0.0120302	0.0245666	0.0215063	0.0151804	0.0148293	0.0204009	0.0189028	0.0202288	0.0211492	0.0209001	0.0207314	0.0209143	0.0187036	0.0198865	0.0193511	0.017588	0.016079	0.0215053	0.0211527	0.0207389	0.0225854	0.0290327	0.0275011	0.0187323	0.0200391	0.0154012	0.0172279	0.0200066	0.0190745	0.0120782	0.0148063
0.00962837	0.00830776	0.00662638	0.00649347	0.00743138	0.00679263	0.00919727	0.00705892	0.00670229	0.00542305	0.0113743	0.0111546	0.0142465	0.0111094	0.0108754	0.00900503	0.0124714	0.0131009	0.00837689	0.0098565	0.013994	0.0153768	0.0068656	0.00793592	0.0103898	0.0123988	0.0114136	0.012595	0.0123858	0.0121531	0.0123098	0.0176008	0.0174729	0.0192201	0.0152172	0.0101513	0.0123794	0.0108292	0.01423	0.0187168	0.0085549	0.0101562	0.0148831	0.0147849	0.0127978	0.0117017	0.0187772	0.0155917	0.0108479	0.0108937
0.0146073	0.0147068	0.0184225	0.0172777	0.0253702	0.0247635	0.0205291	0.0210438	0.0255629	0.0249567	0.0204554	0.0230979	0.0193348	0.020582	0.0211332	0.0223624	0.024373	0.0260086	0.0183249	0.0158322	0.0278314	0.0265829	0.0206464	0.022088	0.028347	0.0261425	0.025776	0.0253998	0.0284873	0.0288452	0.0224199	0.0219792	0.0224894	0.0225357	0.0209938	0.0206745	0.0300894	0.0270792	0.0286701	0.0274217	0.0367527	0.0327715	0.0248173	0.0232863	0.01838	0.0175624	0.0218342	0.0197031	0.0169917	0.01796
0.0189501	0.0172095	0.0203876	0.0197158	0.0265922	0.0266271	0.0231111	0.023243	0.0245264	0.0270351	0.0194492	0.019649	0.0193837	0.0187873	0.0220187	0.0227631	0.0214749	0.0237454	0.0207468	0.0186851	0.0348049	0.030376	0.0211821	0.0220382	0.0276408	0.0283319	0.0311908	0.0314787	0.0264547	0.0263227	0.0249706	0.0235136	0.0247812	0.0247869	0.0205481	0.0184492	0.0281947	0.0236863	0.0269599	0.027419	0.0371002	0.0324282	0.0220073	0.0210847	0.0212962	0.0200451	0.0234784	0.0204635	0.0188755	0.0181784
0.0119914	0.0108269	0.0102726	0.0100327	0.0103502	0.00942639	0.0132027	0.0105213	0.0100073	0.00811636	0.0137581	0.0135251	0.0163997	0.013681	0.014942	0.0120845	0.0154348	0.0170804	0.0141473	0.0138569	0.0190548	0.0184285	0.0114486	0.0114915	0.015304	0.0166787	0.0155892	0.0169435	0.0193325	0.0179395	0.0187335	0.0227848	0.0196533	0.0215399	0.0156436	0.0120197	0.0261634	0.0198305	0.0239511	0.0263305	0.0183143	0.0188809	0.0170614	0.0170601	0.0146718	0.0145763	0.0198106	0.0184527	0.011826	0.013247
0.0122177	0.0103251	0.0110811	0.0104191	0.0106687	0.0098891	0.0139548	0.0105199	0.00979785	0.00819232	0.0160037	0.0142919	0.0182473	0.0147602	0.0149093	0.0126683	0.0170787	0.0169455	0.0140059	0.0165679	0.0199729	0.0199263	0.0112691	0.0110784	0.015544	0.0173663	0.0166313	0.017695	0.0195628	0.0191757	0.0193696	0.0249111	0.0207237	0.0230938	0.0181889	0.0137515	0.0253663	0.0212528	0.0221837	0.0272646	0.0168682	0.0185666	0.019851	0.0182296	0.0171696	0.0162078	0.0220801	0.0212702	0.0137336	0.0148376
0.00971888	0.00825019	0.00764924	0.00800579	0.00766827	0.0066187	0.00888338	0.00719674	0.00732649	0.0059092	0.0103866	0.0104565	0.0118768	0.0100061	0.0108161	0.00867206	0.014352	0.0143189	0.0100839	0.012408	0.0155148	0.01671	0.00808907	0.00928344	0.0122287	0.01369	0.0118821	0.0135596	0.015743	0.0155571	0.0133852	0.0182766	0.0171948	0.0200135	0.0173294	0.012057	0.0192632	0.0164168	0.018031	0.0233097	0.0140468	0.016173	0.0157692	0.0165263	0.0128954	0.013418	0.0193117	0.0173097	0.0102774	0.00980909
0.0102663	0.00883549	0.0080439	0.00760607	0.0077982	0.00692715	0.00906581	0.00666362	0.00673039	0.00568145	0.0118806	0.0106065	0.0127517	0.0102739	0.0116509	0.00964416	0.0146173	0.0148526	0.0112048	0.0115499	0.0167429	0.0166415	0.00886541	0.00940348	0.0121538	0.0135122	0.0126929	0.0134892	0.0166495	0.0152934	0.0127755	0.0185979	0.0160645	0.0184906	0.0145803	0.0104934	0.0228798	0.0187966	0.0210516	0.0244371	0.0151994	0.0156697	0.0164809	0.0169058	0.0150078	0.0136322	0.0198838	0.0185633	0.0114637	0.0125724
0.0228567	0.020842	0.0192053	0.0182596	0.0217697	0.0223102	0.0224243	0.0234452	0.021331	0.022895	0.0148361	0.0204422	0.017239	0.0181693	0.0181339	0.0191954	0.0210279	0.0200532	0.0194365	0.0171429	0.026732	0.0248306	0.0180913	0.0197837	0.022792	0.0231229	0.0233051	0.0235001	0.022396	0.0239396	0.0267338	0.0267878	0.0254055	0.0262096	0.0194041	0.0177991	0.0269547	0.0248548	0.0272327	0.0272035	0.0362225	0.0326597	0.0195609	0.0212236	0.0174044	0.0175304	0.0222945	0.0189906	0.0174481	0.018372
0.0104262	0.00874125	0.0086003	0.00924503	0.00961361	0.00910346	0.0110966	0.00876584	0.00884524	0.00729465	0.0122015	0.0127199	0.0134122	0.0118236	0.0130409	0.0103449	0.0151959	0.0143253	0.0101873	0.0121116	0.0174017	0.0168675	0.00892034	0.010032	0.014163	0.0152079	0.0158882	0.0162619	0.01659	0.0153008	0.0173965	0.0200021	0.0183508	0.0207626	0.0155414	0.0113864	0.0185018	0.0137176	0.0185494	0.0200138	0.0120506	0.0139665	0.0160211	0.0169542	0.01341	0.0131836	0.0198992	0.0184564	0.010289	0.0124603
0.0113441	0.00891894	0.00931038	0.00921091	0.010097	0.0089554	0.0116971	0.00925182	0.00881921	0.00748815	0.0143935	0.0139257	0.0160505	0.012461	0.0148128	0.0117601	0.0167467	0.0170725	0.0135256	0.0152652	0.0190531	0.0186271	0.0104824	0.0101825	0.0141013	0.0160823	0.0160766	0.0173225	0.0179383	0.0178294	0.0168961	0.0218668	0.0210053	0.0223212	0.0187971	0.0132867	0.0225507	0.0173364	0.0228276	0.0240987	0.0136861	0.0147837	0.0158937	0.0148197	0.0136927	0.0134805	0.0205321	0.0185678	0.0121079	0.0122709
0.0156503	0.0149648	0.0169855	0.0170257	0.0227533	0.0221836	0.0184443	0.0191414	0.0219136	0.0221551	0.0161419	0.0175004	0.0157839	0.0163376	0.0190345	0.0181812	0.019686	0.0198529	0.0167891	0.0156246	0.0232905	0.0221534	0.0185337	0.0209228	0.0229252	0.0230215	0.0213956	0.0234566	0.0224095	0.0241843	0.0194431	0.0192894	0.0203481	0.0218086	0.0161982	0.0155592	0.0264518	0.0246966	0.0268054	0.027367	0.0351296	0.0317791	0.0186818	0.0179987	0.0163611	0.017087	0.0213523	0.0184796	0.0148934	0.0146923
0.0231646	0.0179743	0.0180516	0.0173945	0.0216472	0.0206075	0.0244345	0.0220058	0.021073	0.020993	0.0208361	0.0187679	0.0192979	0.0173724	0.0175621	0.0167306	0.0163793	0.0183764	0.0191196	0.0171015	0.0233202	0.0237427	0.0181746	0.0201541	0.0210179	0.0216568	0.0198367	0.0213212	0.0221063	0.0222493	0.0202002	0.0201438	0.0220077	0.0232834	0.0189157	0.0188625	0.0219332	0.0211852	0.0225169	0.0257342	0.0355081	0.0331972	0.0191023	0.0204881	0.0184338	0.018426	0.0212511	0.0187432	0.0153317	0.017667
0.0146201	0.0156048	0.0164312	0.0167846	0.0233449	0.0240221	0.0175755	0.0183621	0.0231128	0.0237956	0.0168782	0.0179543	0.0176205	0.017467	0.0195195	0.0199777	0.0187	0.0215878	0.0184003	0.0146873	0.0250873	0.0265842	0.0165189	0.0188318	0.0245157	0.0246904	0.0228396	0.0241999	0.0230073	0.0243011	0.0204405	0.0213292	0.021973	0.0230152	0.0185258	0.0152513	0.0278115	0.025355	0.0267672	0.0265562	0.0356522	0.032925	0.0202918	0.0195284	0.0168719	0.0180372	0.0219913	0.0185341	0.0147925	0.0148988
0.014661	0.01442	0.0151749	0.0157653	0.0207607	0.0207843	0.0180478	0.0190779	0.0209144	0.0225738	0.0158859	0.0162994	0.0157268	0.0166959	0.0176866	0.0186242	0.0158892	0.0171934	0.0170392	0.0155756	0.023044	0.0234016	0.0176172	0.0190051	0.0222977	0.0214594	0.0203802	0.0201151	0.0226357	0.0223018	0.0189326	0.0181705	0.0192471	0.0197604	0.0164546	0.014636	0.0234655	0.0226663	0.0235816	0.0254368	0.0338585	0.0296866	0.0171083	0.0178833	0.0162656	0.0168296	0.0194128	0.0166418	0.0136264	0.0139054
0.0150299	0.0150026	0.0176444	0.0174893	0.0245899	0.0233631	0.0186306	0.0196822	0.0237175	0.0238723	0.0172056	0.0177617	0.017108	0.0166005	0.0204427	0.0202821	0.0180931	0.0214764	0.0195831	0.0169162	0.0238551	0.0229751	0.0188033	0.0202874	0.0230212	0.0236224	0.0248561	0.0252294	0.024268	0.0253936	0.020194	0.0207655	0.0208137	0.0221621	0.0179324	0.017346	0.0285902	0.0286515	0.0283481	0.0293475	0.0388535	0.0351002	0.0201872	0.0222441	0.0183585	0.0192142	0.0227168	0.0215167	0.0139627	0.0162662
0.0162497	0.0155104	0.017398	0.0184036	0.0219572	0.021215	0.0193705	0.0192404	0.0240501	0.0222173	0.0144043	0.0132773	0.0169849	0.0161559	0.0210594	0.0190979	0.0179186	0.0178603	0.0199548	0.0202815	0.0259966	0.0244531	0.017526	0.0187915	0.022035	0.0217244	0.0227506	0.0241887	0.0220226	0.0218674	0.02156	0.0214452	0.0227289	0.0227884	0.0193083	0.0179424	0.0211348	0.0187798	0.0232372	0.0294534	0.034378	0.0321624	0.0202266	0.0210075	0.0181136	0.0171143	0.0231749	0.0202963	0.0154259	0.0151937
0.0200648	0.018185	0.01931	0.0183187	0.0258323	0.0241296	0.0225221	0.0228897	0.0250343	0.0258256	0.0199554	0.0212479	0.0212606	0.0204162	0.0239096	0.0243001	0.0244215	0.0250292	0.0206812	0.0173255	0.0301296	0.0285838	0.0202799	0.0218248	0.0267762	0.0274596	0.0253778	0.0248865	0.0282486	0.0269217	0.0250545	0.0235521	0.0252506	0.0235347	0.0227714	0.0183161	0.0257958	0.0225698	0.0264938	0.0275219	0.0364204	0.0315613	0.019903	0.0186459	0.0186113	0.0162878	0.0233588	0.0183933	0.0171884	0.013643
0.0193306	0.0180437	0.0217291	0.0201237	0.0285392	0.0267119	0.0232904	0.0236081	0.0290976	0.0281674	0.0226145	0.0215426	0.0226808	0.0213838	0.0236961	0.0227449	0.0260005	0.025248	0.0239944	0.0222936	0.0313666	0.0306912	0.023492	0.0265936	0.0319398	0.0306033	0.0310296	0.0308712	0.0311715	0.0295097	0.0256683	0.0270649	0.0255626	0.027865	0.0209098	0.0183844	0.0320174	0.0300204	0.0300272	0.0292287	0.0402451	0.0352023	0.0268005	0.0248295	0.0244012	0.0240678	0.0254796	0.0243686	0.0201468	0.0204412
0.0155106	0.0152092	0.0189811	0.0178542	0.0232452	0.0226649	0.021465	0.021896	0.0234645	0.0240485	0.0182974	0.0195783	0.0185427	0.0183963	0.0187738	0.0195734	0.018865	0.0205696	0.0198321	0.0177317	0.0246036	0.0221849	0.0202259	0.022142	0.0243502	0.0238142	0.0235776	0.0238607	0.0231784	0.0243215	0.0226567	0.0217611	0.0209203	0.0219707	0.0166794	0.0145728	0.0295424	0.0265932	0.0272375	0.0268305	0.0351186	0.0300858	0.0192245	0.0175131	0.0168964	0.0161232	0.0218658	0.0178364	0.0149763	0.015178
0.0167615	0.013542	0.0181843	0.0181023	0.021999	0.0241515	0.0204878	0.0214762	0.0248435	0.0257993	0.0188649	0.0187995	0.0187113	0.0180711	0.0218394	0.0224993	0.0261587	0.023698	0.0199958	0.0215867	0.0258815	0.0253734	0.0203732	0.0237806	0.0257397	0.0277815	0.0244797	0.0264882	0.0298507	0.0280685	0.0212498	0.0220503	0.0228189	0.0254758	0.0185388	0.0161211	0.0306954	0.0291336	0.0284721	0.0299419	0.0369943	0.0346304	0.0234355	0.022931	0.0213186	0.0205695	0.0248404	0.0221911	0.0191942	0.0189512
0.00915972	0.00774813	0.00695058	0.00699892	0.00773135	0.00659774	0.00881531	0.00784379	0.00709549	0.00553553	0.0105904	0.0100848	0.0110972	0.00971473	0.0103144	0.00845373	0.013516	0.0127789	0.00998707	0.0104547	0.0160878	0.0160408	0.00819608	0.00855753	0.0119682	0.0133066	0.0126951	0.0137849	0.0132604	0.0136769	0.0154867	0.018451	0.0175825	0.0187082	0.015062	0.00957713	0.0206046	0.0165031	0.0187969	0.023275	0.0142009	0.0160123	0.0148845	0.0150245	0.0123348	0.0125069	0.0183129	0.0155142	0.00895041	0.010451
0.0165186	0.0158292	0.0197213	0.0191093	0.0253505	0.0239572	0.021661	0.0219853	0.0254727	0.025549	0.020545	0.020594	0.0184361	0.0206397	0.0213752	0.0226946	0.0246188	0.0254771	0.0229668	0.0209686	0.0319284	0.0287753	0.0217241	0.0233765	0.0288385	0.0287196	0.0279449	0.0270992	0.0295015	0.0294729	0.0220068	0.0222209	0.0243402	0.0244634	0.0192006	0.01601	0.0297516	0.0290848	0.0282857	0.028287	0.0385787	0.0344079	0.0242887	0.0245788	0.0209473	0.0209662	0.024363	0.0218631	0.0176572	0.0188742
0.0208224	0.0203879	0.0200205	0.0203142	0.0253397	0.024202	0.0219343	0.0245418	0.0233601	0.0245348	0.0165037	0.0199794	0.018219	0.019587	0.0198366	0.0207585	0.0221588	0.0251227	0.0219373	0.0222382	0.0303532	0.0264704	0.0194793	0.0224009	0.0265851	0.0264023	0.0238077	0.0256754	0.022855	0.0268396	0.0230425	0.023569	0.0261984	0.0286786	0.0229793	0.0219828	0.0203957	0.0226003	0.0310515	0.0312252	0.0370015	0.0338355	0.0252305	0.0252529	0.0252771	0.0238059	0.0299965	0.0256533	0.0217371	0.0222428
0.0122322	0.0104897	0.0096815	0.0103731	0.00995733	0.00894164	0.0125445	0.0104339	0.00894992	0.00754207	0.0145733	0.0150476	0.0161223	0.0137479	0.0141375	0.0119365	0.0183454	0.0177445	0.0139011	0.0138853	0.0192833	0.0201265	0.00993993	0.0110314	0.0155874	0.0179431	0.0163843	0.0170466	0.0200987	0.0193282	0.0196184	0.0237765	0.0221541	0.0239118	0.0180482	0.0137702	0.0238609	0.0189926	0.0226095	0.0249854	0.0149181	0.0173666	0.0192856	0.0201266	0.0169761	0.0159047	0.0224837	0.0211257	0.0144739	0.0143552
0.0105849	0.00897608	0.00876926	0.00706698	0.00867683	0.00767212	0.0107389	0.00850237	0.00804063	0.00652965	0.0125424	0.0127564	0.0150088	0.0125275	0.013083	0.0109456	0.0171151	0.0165989	0.00978835	0.011166	0.0175136	0.0174624	0.0073501	0.00860073	0.0126809	0.0143736	0.0137171	0.0149738	0.0183047	0.0172643	0.0157344	0.0191365	0.017349	0.0203949	0.0183624	0.0131	0.0238315	0.0199279	0.0221789	0.0253681	0.0158043	0.017272	0.0179032	0.0164838	0.0149597	0.0161093	0.0191159	0.0186018	0.0128551	0.0128439
0.0163961	0.0161757	0.0199648	0.0195512	0.0245254	0.0239745	0.0217147	0.0226747	0.0250827	0.0254148	0.0194012	0.0197427	0.0183791	0.0192765	0.0222894	0.0221176	0.0201946	0.024188	0.0208911	0.0189823	0.0269923	0.0251722	0.0204362	0.0222094	0.0266306	0.0254871	0.0259917	0.0276747	0.0254186	0.0262783	0.0246166	0.0239305	0.0244772	0.0266601	0.0214461	0.0177543	0.0249431	0.022667	0.0270524	0.0263215	0.0380139	0.0315499	0.0205195	0.018974	0.0215163	0.0192013	0.0233764	0.0192225	0.019278	0.0181345
0.01662	0.0130671	0.0200896	0.0202071	0.0267499	0.0277236	0.0210064	0.0222309	0.0260435	0.0261869	0.0208723	0.0187758	0.020117	0.02036	0.0234397	0.0242628	0.0224412	0.0221595	0.0203728	0.0155623	0.0288579	0.0304707	0.0221618	0.0240468	0.027098	0.027132	0.0269583	0.0276423	0.0263718	0.0265388	0.0279743	0.0283465	0.0248762	0.0249195	0.0234099	0.0228373	0.0279955	0.027562	0.0253296	0.0278807	0.0397472	0.0365941	0.023247	0.0233861	0.0218723	0.0218719	0.0247905	0.0204682	0.0186939	0.0175483
0.014864	0.0148417	0.0189308	0.0186428	0.0270272	0.0269009	0.0196917	0.020771	0.0270714	0.0284438	0.0186908	0.017944	0.0185608	0.0171858	0.0219082	0.0229857	0.0175396	0.0231785	0.0202094	0.0152638	0.0284762	0.0278827	0.0198451	0.0223284	0.0275606	0.0281658	0.0271866	0.0283775	0.0252553	0.0256551	0.0248694	0.025945	0.0221526	0.0256126	0.024439	0.0229666	0.0288021	0.0257239	0.0299145	0.0296813	0.0393159	0.0351501	0.0232308	0.0236787	0.0191339	0.0176408	0.0247336	0.0206634	0.0149143	0.016946
0.0120506	0.00968812	0.00978992	0.00926266	0.00881488	0.00866968	0.0115775	0.00941884	0.00865672	0.00714242	0.0136716	0.0132955	0.0154446	0.0124652	0.0118141	0.0104267	0.0154189	0.0162101	0.0116994	0.0139416	0.0177593	0.0184827	0.00911992	0.0105147	0.0137765	0.0159617	0.0144364	0.016511	0.0186403	0.0160926	0.0180182	0.0230751	0.0195843	0.0224848	0.0188156	0.0127215	0.0248295	0.0192353	0.0213835	0.0255387	0.0157898	0.018279	0.0196966	0.0198883	0.0167429	0.0174336	0.0218033	0.0200766	0.0136306	0.01362
0.0153522	0.0157875	0.0186876	0.0179242	0.0245491	0.0246869	0.020369	0.0213341	0.0239161	0.0258461	0.0173981	0.0191958	0.0198666	0.0181142	0.0226313	0.021923	0.0205481	0.0238632	0.0222748	0.0205907	0.0294962	0.0266742	0.0201982	0.0225525	0.0259051	0.0240378	0.0254341	0.0265264	0.0267419	0.0265067	0.0206529	0.0206974	0.0206824	0.022548	0.0196957	0.0185464	0.0299782	0.0282874	0.0270306	0.0282657	0.0364756	0.0327921	0.0216024	0.0206043	0.0190173	0.0195057	0.022377	0.0199781	0.0153736	0.017565
0.00799147	0.00750182	0.00664362	0.0062954	0.00642484	0.00579694	0.00712224	0.00689331	0.00613341	0.00496351	0.0106463	0.0105385	0.0111792	0.00941835	0.00941509	0.00756604	0.013712	0.0138879	0.0102261	0.0111337	0.014145	0.0154576	0.00732232	0.00849159	0.0119098	0.0130002	0.012021	0.0136856	0.0138207	0.0126984	0.0122518	0.0173727	0.013749	0.0166675	0.0139746	0.0114018	0.0196699	0.0150352	0.0187085	0.0230907	0.0137848	0.0145394	0.0150978	0.015793	0.0124776	0.0120285	0.0174711	0.0170614	0.00987343	0.00998077
0.0157031	0.0139535	0.0117473	0.0122655	0.0115391	0.011168	0.0160727	0.0132473	0.0107928	0.00930808	0.0177347	0.0177789	0.0201016	0.0159234	0.0168162	0.0139518	0.0196121	0.0195579	0.0167527	0.0172943	0.0209332	0.0206331	0.0130397	0.0126297	0.0169558	0.019383	0.0196797	0.0197392	0.0217006	0.0222713	0.0227908	0.02702	0.0234047	0.024941	0.0210891	0.0134314	0.0268619	0.0215322	0.0242529	0.0286335	0.0192368	0.0199946	0.0237086	0.0249556	0.0219069	0.0210248	0.0279335	0.0252526	0.0157645	0.0164153
0.0155503	0.01407	0.0177613	0.0172411	0.0218085	0.0232512	0.02012	0.0202436	0.0225952	0.023896	0.0186827	0.0185139	0.0178768	0.0178593	0.0213201	0.0209941	0.0213404	0.0225707	0.0197807	0.0181731	0.0237731	0.0223171	0.0190081	0.0220375	0.0240455	0.0237513	0.0240546	0.025407	0.0270887	0.0269538	0.0206081	0.0207966	0.0214606	0.0226979	0.0168805	0.0150424	0.0300086	0.028693	0.0263114	0.0276089	0.0361113	0.0335417	0.0234314	0.023383	0.0202707	0.0195111	0.0225801	0.0199092	0.0165477	0.0158608
0.015373	0.0149141	0.0179469	0.0184171	0.0251539	0.0259428	0.0198655	0.0205957	0.0246328	0.0252163	0.0186698	0.0187665	0.0178984	0.0179108	0.0215841	0.0218645	0.0194829	0.0208805	0.0190567	0.0163983	0.0274875	0.0230278	0.0204352	0.0219564	0.0282741	0.0254031	0.0244147	0.026482	0.0248889	0.0261432	0.0226426	0.0221107	0.0220219	0.0218786	0.021627	0.0188413	0.0279895	0.0246082	0.0271261	0.0278655	0.037862	0.0318611	0.0239865	0.0222044	0.0220232	0.0224289	0.0240518	0.0202519	0.0202234	0.0183253
0.0175061	0.0175947	0.021332	0.0204174	0.0269641	0.0249193	0.0229387	0.0238617	0.0267686	0.0268078	0.0191407	0.0235801	0.0195595	0.0208523	0.0234686	0.0254214	0.0250271	0.0271345	0.0233257	0.0191531	0.0310739	0.0297942	0.0208651	0.0234877	0.0287495	0.0278437	0.0289759	0.0281101	0.0299452	0.0302195	0.0256273	0.0237462	0.0238727	0.0262277	0.0235412	0.0233712	0.0344737	0.0334798	0.0309392	0.0305277	0.0418954	0.0372713	0.025843	0.0249202	0.0246134	0.0259675	0.0250995	0.0247105	0.0227597	0.0251625
0.0157232	0.0144101	0.0157838	0.0164564	0.0196435	0.0199087	0.0167368	0.0182797	0.0196518	0.0211305	0.0152563	0.0164029	0.0146611	0.0154718	0.0160536	0.0166396	0.0159381	0.0194892	0.0190048	0.0154865	0.0236532	0.0229123	0.016658	0.0190402	0.0210489	0.0204086	0.0201859	0.0229942	0.01995	0.0219838	0.0184631	0.0187131	0.0182236	0.0198941	0.0232187	0.0202854	0.0259094	0.023634	0.0233787	0.0256098	0.0344351	0.031808	0.0176034	0.0207519	0.015474	0.0177357	0.0205898	0.0184179	0.0131296	0.0150822
0.0144591	0.0134679	0.0162279	0.0158571	0.0230844	0.02127	0.0203446	0.0199665	0.0215723	0.0216436	0.0181543	0.0172806	0.0170982	0.0173512	0.0168715	0.0176931	0.018639	0.0219781	0.0173289	0.015478	0.0233773	0.0192429	0.0178146	0.018825	0.0234606	0.0229546	0.0240383	0.0250167	0.0228027	0.0229176	0.0209982	0.019704	0.0234948	0.0226582	0.0218027	0.0216329	0.0205965	0.0133328	0.0271886	0.0268922	0.0333971	0.0260072	0.0201814	0.0195449	0.0182798	0.0173572	0.0231945	0.0197189	0.014879	0.016149
0.0135	0.0126871	0.0150386	0.0162249	0.0220048	0.0191516	0.0174503	0.0179342	0.0190499	0.0189667	0.0158794	0.0173634	0.0159518	0.0162495	0.017711	0.0185781	0.0175617	0.0183004	0.0172783	0.0155844	0.0247844	0.0245198	0.0165889	0.0184287	0.0217543	0.0209196	0.0217511	0.020296	0.0208407	0.0217881	0.0184793	0.0180071	0.0187721	0.0195813	0.0176545	0.015992	0.0240767	0.0244881	0.0237583	0.0265424	0.0345735	0.030876	0.0183847	0.0205898	0.016608	0.0168992	0.0209303	0.0188553	0.0146125	0.0151737
0.0109619	0.00982304	0.00938123	0.00898247	0.00917416	0.00781652	0.0111661	0.00946578	0.00790992	0.00657488	0.0129659	0.0128248	0.0145582	0.0115857	0.0126426	0.0100062	0.0153251	0.015006	0.01285	0.0139612	0.0164947	0.0167462	0.010326	0.0111432	0.0139676	0.0164673	0.0143244	0.0159686	0.0175497	0.0148412	0.0165192	0.0206943	0.0199493	0.0218313	0.0184026	0.0130669	0.022487	0.0179264	0.0219965	0.0259974	0.0155599	0.0168929	0.0169311	0.0184238	0.0164829	0.0155718	0.0211147	0.0204186	0.0122691	0.0139501
0.0181276	0.0167527	0.0199552	0.0204487	0.0239767	0.0255664	0.0219174	0.0245279	0.0255242	0.0277132	0.020363	0.0208905	0.0187392	0.0198927	0.0211263	0.0236796	0.0206245	0.0247326	0.0221666	0.0214872	0.0288723	0.0260925	0.020657	0.0240211	0.0241091	0.0249307	0.0253812	0.0263897	0.0269872	0.0282794	0.0229284	0.023376	0.0238185	0.02501	0.0196457	0.0209319	0.0272533	0.0279041	0.0274775	0.0300144	0.0345885	0.0339418	0.0235202	0.025919	0.0252175	0.0249624	0.0275838	0.0255476	0.0214581	0.0230369
0.0189147	0.0165821	0.0204168	0.0183415	0.0242325	0.023586	0.0215239	0.0215475	0.0234881	0.0251238	0.0201956	0.0173919	0.0186528	0.0194184	0.0217943	0.0227469	0.02181	0.0220285	0.0219703	0.0199183	0.0290848	0.0252597	0.0184101	0.021965	0.0239966	0.0254431	0.0255185	0.0268275	0.0274399	0.0279718	0.0194109	0.0191114	0.023557	0.0246366	0.0197259	0.0207694	0.0316001	0.0309101	0.0298441	0.0296769	0.0392853	0.0362983	0.023779	0.0244441	0.0217184	0.0225821	0.0244999	0.0224172	0.018887	0.0184935
0.0109499	0.00948028	0.00857155	0.00851266	0.00897736	0.00829622	0.0109358	0.00970943	0.00827631	0.00696542	0.0125681	0.0124747	0.0137465	0.0110045	0.0119226	0.0104824	0.0158055	0.0149664	0.0136114	0.0134992	0.0171011	0.0167502	0.00954239	0.010684	0.0137935	0.0156806	0.014617	0.0156608	0.0166029	0.0153872	0.0169322	0.0211311	0.0200141	0.0211716	0.017125	0.0108251	0.0201679	0.014163	0.0196615	0.0225717	0.0130706	0.0149599	0.0159762	0.0165686	0.0142735	0.0136696	0.0202727	0.018882	0.0103502	0.0128229
0.0123011	0.0110423	0.00942113	0.00990447	0.0101801	0.00944222	0.012519	0.010754	0.00909751	0.00780037	0.0146923	0.0131268	0.0158032	0.0129506	0.0143375	0.0120366	0.0155249	0.0155262	0.0158889	0.0162457	0.0180133	0.0169334	0.0112457	0.0110688	0.0148453	0.0166223	0.0172975	0.0164395	0.0195334	0.0186108	0.0190516	0.0209484	0.0211519	0.0204168	0.0166813	0.0114855	0.0238619	0.0196129	0.0243062	0.0252875	0.0183454	0.0172195	0.0154861	0.0149274	0.0150875	0.0143199	0.0191379	0.0168281	0.0114397	0.0131862
0.0149437	0.0135642	0.0192711	0.018681	0.025146	0.023537	0.0199624	0.0218738	0.0247207	0.0257897	0.0186199	0.0202369	0.017904	0.0187341	0.0214162	0.0232143	0.0163201	0.0217995	0.0197892	0.0164033	0.0256066	0.0249488	0.0210216	0.022794	0.0254878	0.0273834	0.0242937	0.0244999	0.0221009	0.0259881	0.0235549	0.021882	0.0214288	0.0206139	0.0157877	0.0140074	0.0283271	0.0261895	0.0264215	0.0261586	0.0364637	0.0312552	0.022398	0.0216988	0.0204526	0.0188518	0.0236891	0.0211456	0.0168881	0.0175552
0.00964825	0.00803656	0.00778075	0.0087792	0.00873539	0.00792536	0.0102305	0.00787878	0.00813539	0.00627112	0.0120215	0.0117816	0.0134246	0.0108047	0.0118368	0.00991113	0.0134629	0.0133791	0.0113942	0.0119889	0.0152044	0.015015	0.00963868	0.00965958	0.0125868	0.0141151	0.0140459	0.0146566	0.0152814	0.0142759	0.0144228	0.0168126	0.0169678	0.0171748	0.0161847	0.0103307	0.0182365	0.0134278	0.0170118	0.0202415	0.0118241	0.0126294	0.01367	0.0122681	0.0133295	0.01339	0.0168563	0.0141526	0.00990621	0.0125885
0.0109027	0.00950739	0.00850176	0.00797518	0.00856114	0.00753562	0.0104266	0.0081437	0.00797191	0.00642276	0.0124226	0.0120464	0.0136205	0.0117258	0.0123773	0.00995055	0.0146473	0.0152949	0.0102974	0.0122466	0.017061	0.0169852	0.0084628	0.00980639	0.0135803	0.0155206	0.0149357	0.0157628	0.0169845	0.016723	0.0166875	0.0201684	0.0192035	0.0219724	0.0158791	0.0114451	0.0195466	0.0164323	0.0217818	0.026723	0.0153121	0.0163977	0.0141372	0.0150121	0.0128072	0.013965	0.0204055	0.0201834	0.0109209	0.0114864
0.016177	0.0157159	0.0185024	0.0179652	0.0209554	0.0215789	0.0197493	0.0211768	0.0219293	0.0233544	0.0208887	0.0200081	0.0180835	0.0188681	0.0200827	0.0210945	0.0217847	0.0224416	0.0173394	0.0163984	0.0266945	0.0230183	0.0175256	0.0196754	0.0209045	0.0209042	0.0216094	0.0236432	0.0223497	0.0224022	0.0216894	0.0225063	0.0235623	0.0259334	0.022212	0.0210507	0.0172067	0.0176667	0.0228344	0.0257161	0.0284272	0.0265645	0.023437	0.023502	0.0226725	0.022313	0.024368	0.0233288	0.0199312	0.0188906
0.0205657	0.0192912	0.0212253	0.021241	0.0239989	0.0252912	0.0244346	0.0255982	0.0231704	0.0241474	0.0201617	0.0231903	0.0197352	0.021414	0.0212914	0.0226923	0.0216029	0.0261683	0.0240396	0.0220148	0.0279256	0.0246626	0.0218205	0.0242874	0.0233813	0.0255759	0.025934	0.0274329	0.0238379	0.0267927	0.0272843	0.0247892	0.0283394	0.0290743	0.0237536	0.0226296	0.0301387	0.027878	0.0297717	0.0308154	0.0400979	0.0377074	0.0224149	0.0230064	0.0221278	0.0223294	0.0249762	0.02074	0.0194396	0.020634
0.00885145	0.00716833	0.00839443	0.00756877	0.00854621	0.00719461	0.00997897	0.00798117	0.00802682	0.00660718	0.0126929	0.0119848	0.0151377	0.0121706	0.0123854	0.0101148	0.0158396	0.0165237	0.00974253	0.011174	0.0170065	0.0177537	0.00884073	0.00907954	0.0140387	0.0151996	0.0150475	0.0138774	0.0184014	0.0159862	0.0167156	0.0204039	0.0186135	0.0209161	0.0173212	0.0120539	0.0246456	0.0198414	0.0212227	0.0243929	0.0156579	0.0171934	0.01709	0.0168803	0.0151886	0.0146672	0.0197346	0.018119	0.0118537	0.0126167
0.0100547	0.00937518	0.00807293	0.00764639	0.0077036	0.00749051	0.0102839	0.00882982	0.00813361	0.00703246	0.0122571	0.011282	0.0137664	0.0116552	0.012239	0.0101725	0.0140815	0.0129388	0.0101495	0.011971	0.0150864	0.01411	0.00864652	0.00920964	0.0123746	0.0137287	0.0125328	0.0140584	0.0157978	0.0152219	0.0142792	0.0176347	0.017057	0.0184625	0.014982	0.0096403	0.020313	0.0166229	0.017729	0.0223634	0.0136427	0.0154236	0.0116506	0.0118688	0.010934	0.0119201	0.0158441	0.0147583	0.0101392	0.0120743
0.0135653	0.0110384	0.00957774	0.00966331	0.00945292	0.008672	0.0116425	0.00934996	0.0085538	0.00739218	0.0146079	0.0143647	0.0169293	0.0138412	0.0142035	0.0122713	0.01741	0.0174598	0.0124504	0.0154576	0.0177092	0.0185543	0.0102614	0.0117286	0.0143645	0.0168194	0.0154435	0.0162579	0.0183054	0.0169396	0.0168872	0.0220804	0.0201575	0.0226154	0.0173877	0.0136471	0.0208683	0.0157459	0.0182836	0.0220269	0.0144617	0.0157114	0.0195914	0.0206144	0.0178853	0.0169544	0.0237448	0.0221533	0.0124554	0.0139774
0.0169081	0.0154463	0.0175264	0.0166798	0.0220529	0.022099	0.019198	0.0204396	0.0233323	0.0229458	0.0176986	0.019344	0.0162601	0.0175747	0.0188501	0.0196019	0.0203351	0.0222993	0.0187836	0.0167314	0.0270273	0.0238813	0.0186119	0.0194111	0.024946	0.0244301	0.0230321	0.0234465	0.0238977	0.0243538	0.0194731	0.0192501	0.0178375	0.0196794	0.015684	0.0165236	0.0266385	0.0223631	0.0267395	0.0259487	0.0360128	0.0300539	0.0269471	0.0270569	0.0250559	0.0209899	0.0244807	0.0238647	0.0184728	0.0201997
0.011897	0.0102853	0.00967168	0.00916895	0.0101642	0.00869027	0.0130015	0.0107133	0.00848216	0.00761271	0.0140929	0.0141253	0.0169821	0.0137189	0.0133626	0.0119088	0.0177031	0.0170578	0.0135972	0.0136741	0.0213453	0.021233	0.0105753	0.0113453	0.0155522	0.0182584	0.0160632	0.0164296	0.0196454	0.016308	0.0188331	0.0244222	0.0226188	0.0246671	0.0196559	0.0148271	0.0257833	0.0203504	0.022406	0.0273182	0.0187906	0.0198312	0.0166041	0.017636	0.0146307	0.0157073	0.0203282	0.0198524	0.0121138	0.0143468
0.0196885	0.0181097	0.0183964	0.0181659	0.0241666	0.023825	0.0203881	0.0205855	0.022964	0.0233916	0.0183323	0.0188314	0.0177556	0.0164987	0.0215868	0.0214256	0.0203917	0.0229117	0.019349	0.0165521	0.027879	0.0257916	0.0193938	0.0199446	0.0246147	0.0245244	0.0244324	0.0245509	0.0251604	0.0254733	0.0225346	0.0226697	0.0228585	0.0224598	0.0200377	0.0192503	0.0252174	0.0243148	0.0288794	0.0286038	0.0378628	0.0321264	0.0233462	0.0259784	0.0237507	0.0225374	0.0250197	0.0213144	0.0199684	0.0213055
0.0121286	0.0111063	0.00998185	0.00961355	0.0101896	0.00923122	0.0124848	0.00979545	0.00957653	0.00778936	0.0148485	0.013734	0.0166438	0.0136902	0.0138057	0.0120396	0.0156063	0.0159641	0.0130814	0.0152802	0.0195382	0.0191589	0.0106602	0.0111381	0.0150498	0.0165229	0.0157578	0.017201	0.0192349	0.0184145	0.0180405	0.0228624	0.0201778	0.023578	0.0180232	0.0129848	0.0200049	0.0157833	0.0209157	0.0245433	0.0156777	0.0167459	0.0187515	0.017804	0.0154224	0.0155874	0.0233249	0.0212314	0.0122181	0.0127435
0.0120346	0.0095676	0.00844251	0.0077763	0.00819405	0.00797932	0.0108506	0.00866528	0.00807151	0.00664073	0.0121218	0.0120207	0.0145588	0.0118877	0.0118963	0.0102718	0.0152447	0.0158823	0.0125241	0.0134276	0.016554	0.017066	0.0088715	0.0100331	0.0137969	0.0156278	0.0140542	0.014734	0.0164665	0.0155435	0.0146186	0.0189968	0.0187692	0.021062	0.0161156	0.0124976	0.0198769	0.0174134	0.0185638	0.0230455	0.013199	0.0149955	0.0163699	0.0184868	0.0143719	0.0152294	0.021949	0.0213687	0.0105947	0.011841
0.0162521	0.0155577	0.0188376	0.0186992	0.0216957	0.0217099	0.020767	0.0221403	0.0245017	0.0261668	0.0201066	0.019797	0.018015	0.0175051	0.020416	0.0208793	0.022172	0.0234795	0.0215176	0.0184035	0.0252295	0.0253806	0.0209268	0.0232934	0.0246132	0.0247246	0.0238215	0.0262857	0.0246669	0.0242541	0.0204998	0.0211575	0.0219023	0.0229835	0.0186192	0.0188984	0.0245748	0.0223351	0.024179	0.0264227	0.0323221	0.0296389	0.0234594	0.0248754	0.0222944	0.0222953	0.0246751	0.0207932	0.0168145	0.0187004
0.0200565	0.0182711	0.0225325	0.0218945	0.0233423	0.0259029	0.025878	0.0261013	0.0284968	0.0300687	0.0206928	0.0237598	0.0233044	0.0229819	0.0252815	0.0259457	0.025413	0.0299997	0.022963	0.0207516	0.0343904	0.0333722	0.023501	0.0263644	0.0299647	0.0301169	0.0315558	0.0322294	0.029708	0.0311657	0.0249395	0.0256322	0.0264372	0.0290282	0.0230459	0.0237426	0.0305603	0.0311442	0.0277346	0.0327707	0.0333117	0.0349611	0.0312573	0.0327319	0.0242525	0.0273619	0.0309829	0.0298834	0.0198224	0.0225879
0.0145928	0.0141103	0.0149853	0.0155994	0.0211433	0.0221278	0.0166364	0.018005	0.0197137	0.0209562	0.0164403	0.0168411	0.0173503	0.0162527	0.0180058	0.0185258	0.0154016	0.0199945	0.0158703	0.0137208	0.0215363	0.0206087	0.0169052	0.01744	0.0226305	0.0217805	0.0216173	0.0228265	0.0210615	0.0228849	0.0202888	0.0204186	0.0205863	0.0208113	0.0168035	0.0144792	0.0255289	0.0225661	0.0242144	0.0237947	0.0330677	0.0283599	0.0170279	0.0172454	0.0154929	0.0169717	0.0199042	0.0176005	0.0144749	0.014791
0.0146386	0.0138276	0.0196488	0.0176616	0.0231554	0.0246637	0.0198034	0.0212101	0.0237741	0.024732	0.0199217	0.0192632	0.019229	0.0193909	0.0214501	0.0217048	0.021948	0.0226187	0.0198434	0.0183042	0.0273493	0.0277785	0.0200414	0.0230254	0.0256361	0.0263373	0.0255423	0.0269867	0.0247147	0.0254953	0.0238234	0.0239707	0.0213838	0.0220712	0.019976	0.0166647	0.0286802	0.0256883	0.0286063	0.0289415	0.0384098	0.0344702	0.0197268	0.0209039	0.0160981	0.0176695	0.023369	0.0197615	0.0140629	0.015622
0.0105658	0.00880525	0.00725338	0.00747727	0.00758224	0.00711968	0.00953774	0.00759602	0.00774993	0.00623037	0.0128394	0.0122568	0.0134767	0.0118832	0.0106457	0.00901567	0.0132397	0.0160165	0.00929609	0.0114274	0.0155604	0.0170495	0.00777085	0.00839161	0.0118599	0.0135975	0.0122434	0.0143676	0.0132062	0.0130541	0.0129247	0.0182453	0.0181049	0.021792	0.0163718	0.0123039	0.0143978	0.0127843	0.0174317	0.0234916	0.0132238	0.0147485	0.0161438	0.0180619	0.0127924	0.0136086	0.0195906	0.0195704	0.00987343	0.0106149
0.0142581	0.0138851	0.0149231	0.0141355	0.0191306	0.0199937	0.0174462	0.018354	0.0192131	0.0217087	0.0162928	0.0161304	0.0157028	0.0163111	0.0170224	0.0192494	0.0175968	0.0183882	0.016125	0.0157218	0.0250725	0.0225495	0.0155566	0.017573	0.0212215	0.0216287	0.0215053	0.0221268	0.0210052	0.0227421	0.0188677	0.0197836	0.0188095	0.021161	0.0173185	0.0150506	0.0241567	0.0230962	0.0242473	0.0241326	0.031787	0.0282159	0.0166461	0.0168684	0.0161212	0.0166655	0.0194579	0.0175502	0.0145135	0.0145564
0.0181551	0.016733	0.0194285	0.0185601	0.024542	0.0240932	0.0215888	0.0231397	0.0248956	0.0269475	0.0196938	0.0235869	0.0202747	0.0213258	0.0223255	0.0233832	0.0249245	0.0270226	0.0219954	0.0205768	0.0282063	0.0294987	0.0200161	0.0233544	0.0264716	0.0273411	0.0274121	0.0281059	0.0283331	0.0291096	0.0238135	0.0247607	0.0257727	0.0264878	0.0191705	0.0187824	0.0336874	0.0293136	0.0302972	0.0294397	0.0403044	0.0351476	0.0278373	0.0262758	0.0248285	0.0240599	0.0274791	0.023917	0.0205847	0.0199192
0.0133297	0.0113353	0.0114437	0.0108462	0.011038	0.0102042	0.0140729	0.0103866	0.01059	0.00854676	0.0151866	0.0144626	0.0180409	0.0144418	0.014971	0.0125924	0.0190691	0.0171268	0.0149798	0.0148579	0.0203932	0.019885	0.012042	0.0126326	0.0155357	0.0188605	0.0167689	0.0185274	0.0217263	0.0200455	0.0220205	0.0251379	0.0244765	0.0255364	0.0199944	0.0126301	0.0264205	0.0209409	0.0245674	0.0282448	0.0193503	0.0186709	0.0193371	0.0184043	0.0169678	0.0155225	0.0215861	0.0197194	0.0124263	0.0130616
0.0139533	0.0146843	0.0154396	0.0145798	0.0196089	0.0203117	0.0170175	0.0178662	0.0199411	0.0218154	0.014344	0.0176108	0.0160428	0.016319	0.0157132	0.016636	0.0209271	0.0210084	0.0174099	0.0136812	0.0216364	0.0210833	0.0156415	0.0176582	0.020969	0.0232645	0.0206031	0.0219156	0.0227144	0.0227624	0.0175282	0.0170842	0.0190155	0.0192645	0.00916949	0.00884749	0.0237527	0.0218914	0.0235501	0.0248148	0.0275861	0.0262434	0.0231195	0.0235141	0.0192907	0.0190806	0.022043	0.0188644	0.0160862	0.0151673
0.0120155	0.012112	0.00941038	0.0106724	0.010087	0.00893221	0.0117889	0.0112508	0.00910188	0.00770825	0.0144948	0.0151163	0.015755	0.0146208	0.0130872	0.0110952	0.0153008	0.0163952	0.0121671	0.0141716	0.0169213	0.0168752	0.00965843	0.0114223	0.0137857	0.0156375	0.013914	0.0164013	0.0166252	0.016604	0.0162027	0.0220128	0.0189785	0.0222261	0.0167979	0.011983	0.021544	0.0185587	0.0206417	0.0246151	0.0152141	0.0161438	0.0125626	0.0135931	0.0125819	0.0124326	0.0170596	0.0157263	0.011291	0.0126064
0.00796778	0.00729914	0.00602368	0.00607558	0.00612796	0.00583667	0.00704716	0.0058021	0.00563014	0.00434987	0.00916913	0.00915979	0.00956869	0.00817688	0.0087172	0.00752077	0.0114385	0.0121414	0.00986244	0.0106285	0.0129255	0.0128169	0.0072853	0.00732132	0.0102619	0.0121169	0.011257	0.0110708	0.0119597	0.0123211	0.0119289	0.0159324	0.0142581	0.016459	0.011876	0.00880945	0.0180043	0.0154081	0.0158203	0.0187358	0.01265	0.0129933	0.0121753	0.0128522	0.0115771	0.0116497	0.0164362	0.0144819	0.00820333	0.0103195
0.0170301	0.0159806	0.0196162	0.0194972	0.0275321	0.0279618	0.0219602	0.0233437	0.0245949	0.0237051	0.0194513	0.0200185	0.0170783	0.0182695	0.0205256	0.0211733	0.0171362	0.0227036	0.0199821	0.018698	0.0280786	0.0244183	0.0198786	0.0230681	0.0259318	0.0262361	0.0253561	0.026548	0.0242952	0.025659	0.0231307	0.0238291	0.0241574	0.0267742	0.0253621	0.0246958	0.0285116	0.0286254	0.0285198	0.0290377	0.0391042	0.034261	0.0232277	0.0232568	0.0208239	0.0192723	0.0274032	0.0235296	0.0174804	0.0165884
0.0116281	0.00969782	0.00983643	0.00949725	0.00937978	0.00864524	0.012548	0.00987097	0.00930796	0.00751095	0.0137438	0.0138461	0.0150813	0.012142	0.0139691	0.0112674	0.01627	0.0155258	0.0131661	0.0138899	0.0180299	0.0182546	0.00908518	0.00980945	0.0132324	0.0150074	0.0143417	0.015765	0.0186961	0.0172273	0.0170132	0.0213762	0.021566	0.0207192	0.0186243	0.0125584	0.0272676	0.0239387	0.0224919	0.0263951	0.0173684	0.0184208	0.0177628	0.0175574	0.0165066	0.0159366	0.020998	0.0185531	0.0118167	0.0133844
0.0111614	0.00948058	0.00836627	0.00854933	0.00850378	0.00740731	0.00979407	0.00860647	0.00764782	0.00617206	0.0121126	0.0128189	0.0134591	0.0113772	0.0119268	0.00986983	0.0144556	0.0159227	0.012269	0.014086	0.0159611	0.0160807	0.00938365	0.00993771	0.0125338	0.0145514	0.0126788	0.0147572	0.0165093	0.0150879	0.0154636	0.0213554	0.0177972	0.0215271	0.016712	0.0109108	0.0149197	0.014206	0.0167373	0.0215394	0.0131293	0.0142875	0.0131727	0.0148282	0.0126568	0.0129828	0.0168587	0.0170084	0.0103893	0.0109423
0.0157256	0.0150905	0.0152824	0.0142671	0.0224059	0.0192807	0.0170238	0.0186679	0.0200794	0.0207447	0.0175088	0.0190368	0.0164306	0.0181471	0.0174063	0.0171057	0.0170625	0.0192401	0.0165439	0.0146084	0.0229239	0.0207252	0.016134	0.0174455	0.0206127	0.0212594	0.0194359	0.0197956	0.0214299	0.0222781	0.0207151	0.0198562	0.02004	0.0212331	0.0169524	0.0140172	0.0185505	0.0188144	0.023163	0.0254973	0.0307805	0.0289746	0.0132747	0.0147584	0.0124709	0.0128541	0.0183859	0.015727	0.0115078	0.0120677
0.0108188	0.00813884	0.00807718	0.0086398	0.00894621	0.0080381	0.00986809	0.00839051	0.00804285	0.00723118	0.0129975	0.0120944	0.0139498	0.0117759	0.0131354	0.0116686	0.0147034	0.0136512	0.0104013	0.0125849	0.0178731	0.017686	0.00864976	0.00882025	0.0132889	0.0147572	0.0145799	0.0157127	0.0156375	0.0148947	0.0154225	0.019245	0.0193459	0.021776	0.0192659	0.0133811	0.0230639	0.0189504	0.0219666	0.0262387	0.0139977	0.0157834	0.0167206	0.0167001	0.0145009	0.0136098	0.0210483	0.0185197	0.0110383	0.013097
0.0163885	0.0158447	0.0217618	0.018769	0.0254835	0.024142	0.0239321	0.0238951	0.0269771	0.0268219	0.0199462	0.0231948	0.0211873	0.0215493	0.0242019	0.0239598	0.0245546	0.0249866	0.0206369	0.0193584	0.0298377	0.0285213	0.0232726	0.024904	0.0268475	0.0258856	0.0243734	0.0245376	0.027694	0.0283649	0.0259312	0.0244877	0.0235994	0.0261195	0.0205816	0.0185704	0.0299195	0.0268371	0.0282873	0.0280305	0.0390917	0.0366726	0.0254447	0.0248455	0.0231486	0.0223943	0.0219857	0.0201786	0.0180582	0.0180368
0.019573	0.0181587	0.0181547	0.0175191	0.0235184	0.0229533	0.0204622	0.0213142	0.024611	0.0246863	0.0199654	0.019225	0.0175623	0.0193672	0.0189001	0.0211973	0.0195068	0.0210581	0.0192282	0.0169207	0.0265067	0.024492	0.0195255	0.021582	0.0271055	0.0269536	0.0241769	0.025362	0.0244436	0.0262	0.0239945	0.0226091	0.0214945	0.0224397	0.0172903	0.0157536	0.0251424	0.0241251	0.0253881	0.0260205	0.0344454	0.0294348	0.0188414	0.0194132	0.0210378	0.0200937	0.0233072	0.0182527	0.0164929	0.0148767
0.0182656	0.0170992	0.0194865	0.0197409	0.0238208	0.0242071	0.0207906	0.0213265	0.02539	0.0253288	0.0193875	0.0196129	0.0173827	0.0184477	0.0210143	0.021583	0.0238626	0.0253681	0.0211174	0.0200616	0.0259917	0.0264435	0.0207654	0.0238202	0.0255311	0.0262854	0.0271025	0.0279299	0.0268838	0.0275668	0.021997	0.0233933	0.0237819	0.0271393	0.0222704	0.02049	0.0308967	0.0294465	0.0288185	0.0295527	0.0379796	0.0339419	0.0216557	0.022512	0.0199916	0.0207715	0.0253859	0.021913	0.0172291	0.0198253
0.0149144	0.0135748	0.0177046	0.0182063	0.0231298	0.0237123	0.0186593	0.0199248	0.0219503	0.0218188	0.0190136	0.0195381	0.0168031	0.017371	0.0193655	0.0190709	0.0228539	0.0231502	0.0231577	0.0186074	0.027869	0.0259506	0.018937	0.0210202	0.0239357	0.0229628	0.0223715	0.0234741	0.0240748	0.0244225	0.0206408	0.0204783	0.0231039	0.0235984	0.0197401	0.0184138	0.0264905	0.0242465	0.0282348	0.0290636	0.0374375	0.0337082	0.0219867	0.0205054	0.0196355	0.0188176	0.0228689	0.0194078	0.0155351	0.0168899
0.0178891	0.0168352	0.0199158	0.0203034	0.0240737	0.0253366	0.021683	0.0233083	0.0240929	0.0257258	0.0214386	0.0210415	0.0208048	0.0188915	0.021652	0.0220061	0.0232088	0.0241637	0.0212229	0.020397	0.0299304	0.0271125	0.021105	0.024395	0.0271937	0.025353	0.0244813	0.0271808	0.0281861	0.0292303	0.0222685	0.0230967	0.0216289	0.0238302	0.0208265	0.0203692	0.0285416	0.0281224	0.0270957	0.0288229	0.0353652	0.0351479	0.0234776	0.022467	0.0217745	0.0209555	0.0237991	0.0224207	0.0197967	0.019708
0.0224031	0.0213726	0.0244277	0.0237062	0.0263489	0.0273815	0.0252866	0.0263738	0.0277447	0.0303504	0.0212541	0.0229059	0.0197442	0.0205916	0.0223982	0.0249636	0.0240601	0.0272628	0.0242138	0.0253277	0.0339415	0.0267939	0.0242709	0.027574	0.0296325	0.0282863	0.0281288	0.029423	0.0257627	0.0282727	0.0271993	0.0267991	0.0302408	0.032275	0.0278589	0.0264267	0.0250345	0.025991	0.0278285	0.0305959	0.0344176	0.0356295	0.0265805	0.0260327	0.0246215	0.0237952	0.0307255	0.0242665	0.0209705	0.0202933
0.0178118	0.016206	0.0180555	0.0180618	0.0222878	0.0236058	0.0198773	0.0210152	0.0219697	0.0236273	0.0174677	0.0213794	0.0180637	0.0184761	0.0192731	0.020365	0.0221293	0.024056	0.0227709	0.0182659	0.0246261	0.0247886	0.0198241	0.0209606	0.0250929	0.0254405	0.0234372	0.0237214	0.024573	0.0262388	0.0246621	0.0259245	0.0220536	0.0249846	0.0212678	0.0202543	0.0229404	0.0231709	0.0259341	0.0266737	0.0331004	0.0307772	0.0275399	0.0301583	0.022322	0.0237011	0.0260211	0.0251502	0.018644	0.0206418
0.015696	0.015877	0.0177291	0.0187298	0.0243481	0.0239514	0.0212507	0.0226761	0.0225808	0.0234653	0.0194608	0.0198646	0.017179	0.0186179	0.0191898	0.0193993	0.0222679	0.0230398	0.0189289	0.0146531	0.0289973	0.0253658	0.0169924	0.0184472	0.0250469	0.023902	0.0244182	0.0252713	0.0233345	0.0253583	0.0247672	0.0245022	0.0257049	0.0260564	0.0251779	0.0228457	0.0256846	0.023485	0.0271324	0.0289823	0.0355608	0.0326573	0.0252046	0.0252299	0.0217696	0.0205803	0.0265647	0.0219944	0.0177922	0.0186512
0.0110425	0.0097619	0.00872892	0.00859063	0.00860519	0.00785566	0.0111393	0.00904673	0.0078441	0.00648729	0.0126207	0.0129667	0.0143408	0.011659	0.0111481	0.00938541	0.0142092	0.0151488	0.0113436	0.0115211	0.0173473	0.0165496	0.00894566	0.00972677	0.0124539	0.0147981	0.0139667	0.0153179	0.0162928	0.0156148	0.0161003	0.0202498	0.0182117	0.0214494	0.0166579	0.0117226	0.0230508	0.0180912	0.0212319	0.0256166	0.016277	0.0157984	0.0144863	0.0149134	0.0127121	0.0122607	0.0189319	0.0178844	0.0107969	0.0118837
0.0107378	0.00941545	0.00930275	0.00863735	0.00860568	0.0079545	0.0107671	0.00893465	0.00813976	0.00668312	0.0126736	0.0122328	0.0142378	0.0116749	0.0112929	0.00993129	0.0150547	0.0148091	0.0127397	0.0135621	0.0164157	0.0166915	0.00978186	0.0104738	0.0140221	0.0154426	0.0142269	0.0153499	0.0174264	0.0147886	0.0162118	0.0220763	0.0181728	0.0216728	0.0177831	0.0117961	0.0240448	0.0194788	0.020971	0.0248852	0.0145584	0.0155854	0.0152057	0.0154101	0.0125776	0.0135174	0.0189657	0.0187194	0.0100293	0.0118108
0.0134424	0.0138136	0.0168703	0.018037	0.0258481	0.0245939	0.0180926	0.0194468	0.0242135	0.0244394	0.0179633	0.0171279	0.0160122	0.0187686	0.0211743	0.0218645	0.0167832	0.0201186	0.0182317	0.016324	0.0232448	0.0233931	0.0197647	0.021635	0.0257195	0.0261697	0.0260931	0.0264397	0.0219433	0.0255933	0.0225647	0.0222696	0.0221432	0.0235523	0.0223492	0.0215354	0.0228655	0.0222478	0.0246744	0.0292377	0.0387714	0.0362096	0.0197129	0.0234795	0.0165781	0.019101	0.02263	0.0202587	0.0123714	0.0160359
0.0081461	0.0064107	0.00637635	0.00605516	0.00628649	0.00568993	0.00804753	0.00609284	0.00629932	0.00460828	0.00983307	0.00961264	0.0125173	0.0101742	0.00948662	0.00797456	0.012034	0.0118567	0.00866571	0.00947865	0.0116636	0.0124146	0.00692026	0.00778459	0.00975414	0.0111571	0.0103212	0.010956	0.0119748	0.0120615	0.0111838	0.016035	0.0132739	0.0178774	0.0117097	0.00937367	0.0143034	0.0118214	0.0123301	0.0175087	0.00815946	0.010483	0.0113141	0.0123882	0.010864	0.0107969	0.01449	0.0142168	0.00756884	0.0095063
0.0119587	0.00958377	0.0103097	0.00950232	0.0105009	0.00965163	0.0129099	0.0102209	0.010242	0.00820592	0.0141603	0.0134172	0.0152444	0.0130237	0.0139229	0.0114279	0.0162063	0.0152476	0.013393	0.0140228	0.0188944	0.0182242	0.0113543	0.0121472	0.0152087	0.0174862	0.0165775	0.0175755	0.0179485	0.0179469	0.0190635	0.022291	0.0205437	0.0220237	0.0202552	0.0122933	0.0262315	0.02113	0.0236184	0.027048	0.0176424	0.0186073	0.0196003	0.0202454	0.0193026	0.0172997	0.0227265	0.0204144	0.0139243	0.0163364
0.0156252	0.0150742	0.015944	0.0157435	0.0197173	0.0195012	0.0173701	0.0201874	0.0183804	0.0185121	0.0161359	0.0183649	0.0150992	0.0159127	0.0165894	0.0175751	0.0165745	0.0185662	0.0179955	0.015967	0.0211532	0.0193728	0.015449	0.0176735	0.0200069	0.0197425	0.0207239	0.0222653	0.0177532	0.0195911	0.02156	0.0203975	0.0224718	0.0222262	0.019275	0.0179314	0.0202651	0.0147307	0.0231534	0.0243535	0.0318652	0.0282348	0.0165439	0.0154518	0.0177244	0.0158876	0.0198218	0.0168647	0.0160218	0.0147185
0.0172122	0.0163931	0.0183621	0.0189039	0.0257422	0.0269598	0.0241812	0.0244136	0.0248678	0.0259669	0.0174695	0.0204575	0.0202363	0.0210647	0.0217547	0.0231	0.017316	0.0224525	0.0180714	0.0168884	0.0281678	0.0277752	0.0194372	0.0223014	0.0248614	0.0257504	0.0251388	0.027325	0.0228654	0.0251436	0.0281389	0.0274392	0.0275792	0.0286766	0.0306213	0.027223	0.0264735	0.025614	0.0297568	0.0322065	0.0334638	0.0323065	0.0251884	0.0259287	0.0235185	0.0213983	0.0289171	0.0240265	0.0213239	0.0191482
0.0118939	0.0104246	0.00937748	0.00897481	0.00977128	0.00832649	0.0123391	0.00980092	0.00908737	0.00717907	0.0143508	0.0137742	0.0152165	0.0121147	0.0125346	0.0102443	0.0160512	0.0159756	0.0123786	0.0152703	0.0190334	0.019641	0.0103741	0.0102498	0.014001	0.0157257	0.0146772	0.0160179	0.0179705	0.0163848	0.0185874	0.0227116	0.0230463	0.0244793	0.0202187	0.0127409	0.0205151	0.0143507	0.0218512	0.0237308	0.0169595	0.0154579	0.0168145	0.0174593	0.0150716	0.0151323	0.020364	0.018827	0.012608	0.013837
0.00987733	0.00781893	0.00894323	0.0077459	0.00892862	0.00779418	0.0108269	0.00754996	0.00809844	0.00671065	0.0118687	0.0112917	0.01379	0.0114516	0.0115645	0.0102174	0.0144815	0.0143092	0.010682	0.0117624	0.0178675	0.0178592	0.00971876	0.00947678	0.0131934	0.014065	0.0144743	0.0150204	0.0163776	0.0148192	0.0163505	0.0196351	0.0202786	0.0213967	0.0197266	0.0149974	0.0218314	0.0157708	0.0207433	0.0233154	0.0138467	0.0149495	0.018719	0.0196199	0.0162108	0.0139945	0.0221682	0.0214992	0.0108491	0.0123127
0.0116018	0.0102481	0.00991839	0.00993807	0.0109383	0.00973441	0.013039	0.0106178	0.00991209	0.00829431	0.014574	0.013876	0.0160635	0.0144521	0.0155277	0.013317	0.0166492	0.0161173	0.0138924	0.0140923	0.0177427	0.0167031	0.0112719	0.0114357	0.0151745	0.0169046	0.0168147	0.0177752	0.0199594	0.0200511	0.0207941	0.0229976	0.0207955	0.0209119	0.0169596	0.0106692	0.025695	0.0208846	0.0223478	0.0251996	0.0178389	0.0175661	0.0196318	0.0185125	0.0176765	0.0161393	0.0221433	0.0198446	0.0133114	0.014805
0.0137379	0.0121323	0.0108961	0.0109224	0.0115192	0.0107439	0.0140972	0.0117182	0.010791	0.0097409	0.0152322	0.0159761	0.01744	0.0150306	0.0157504	0.0136043	0.0175473	0.0173967	0.0165697	0.0150491	0.0194943	0.0185543	0.0129746	0.0129006	0.0162509	0.0182374	0.0173506	0.0185377	0.0196583	0.0188565	0.0211269	0.024421	0.0249855	0.023976	0.0200651	0.0132979	0.0248048	0.0205743	0.0243504	0.0271707	0.0185206	0.0178442	0.0227537	0.0203101	0.0207718	0.0185816	0.024167	0.0223229	0.0150017	0.0172573
0.00830045	0.00654975	0.00717252	0.00661272	0.00741602	0.00659063	0.00900856	0.00739511	0.00649019	0.00546696	0.0107406	0.0107918	0.012592	0.0101151	0.0104414	0.00864829	0.0127602	0.0127475	0.00956374	0.00995625	0.0142445	0.014224	0.00698934	0.00735888	0.0107687	0.0118691	0.0112879	0.0128824	0.0134548	0.0133794	0.0124792	0.0168877	0.0154025	0.0173372	0.0130351	0.00896446	0.0169072	0.0132783	0.0152571	0.0197109	0.0115237	0.0132518	0.0112057	0.0125087	0.0106339	0.0105386	0.0159485	0.0145171	0.00813478	0.00963054
0.00937531	0.00938934	0.00858182	0.00790813	0.00853538	0.00741987	0.00963886	0.00817897	0.00833804	0.00650659	0.0125898	0.0114075	0.0141132	0.0113053	0.0124076	0.0101972	0.0136702	0.0136637	0.0111131	0.012991	0.0159098	0.0146381	0.00933151	0.00978721	0.0126081	0.0139153	0.0124298	0.0145843	0.015996	0.0154482	0.0152715	0.0185493	0.016805	0.019195	0.0144984	0.00994899	0.0201441	0.0170691	0.0192401	0.0238537	0.0135996	0.0153712	0.0152043	0.0157362	0.014792	0.0145863	0.0181025	0.0171529	0.0102796	0.0110642
0.0124	0.00944506	0.00933907	0.00865349	0.0101623	0.00875297	0.0114344	0.00921673	0.00929228	0.00709737	0.0138798	0.0135889	0.0141733	0.0127545	0.0135317	0.011043	0.0173914	0.01706	0.0119069	0.0131333	0.0214957	0.0215641	0.0101887	0.0103215	0.0156071	0.0168888	0.0177651	0.0168432	0.0195404	0.0186189	0.0173366	0.0210726	0.0237296	0.0262558	0.0229534	0.0155262	0.0258116	0.0194403	0.0275379	0.0307029	0.0190995	0.0186163	0.0195366	0.0196927	0.0162585	0.0164828	0.022937	0.020975	0.0129763	0.0149004
0.0183832	0.0173833	0.0206151	0.0200736	0.0271872	0.0260328	0.0233475	0.0241973	0.0285484	0.0273314	0.0201715	0.0231385	0.0204537	0.0218649	0.0224223	0.0232595	0.0232361	0.0252365	0.0218503	0.0205272	0.0310923	0.0313489	0.0214734	0.0235937	0.029873	0.0278956	0.0278131	0.0273792	0.0274257	0.0292537	0.0247029	0.024331	0.0242331	0.0251323	0.0190223	0.0181689	0.0356666	0.0331656	0.0312898	0.0319116	0.0425632	0.0367739	0.0217428	0.0204156	0.0192825	0.0199004	0.0233399	0.0208662	0.0166947	0.0183038
0.016879	0.0165263	0.0191237	0.0187283	0.0253443	0.0258251	0.020534	0.0220275	0.0253171	0.0263941	0.0182494	0.0202102	0.018945	0.0195305	0.0224115	0.0222147	0.0225932	0.0248592	0.0222106	0.0194819	0.0309854	0.0284422	0.0217823	0.0252699	0.0272716	0.0276089	0.0272779	0.0278518	0.0264552	0.0278864	0.0255015	0.0254315	0.0227343	0.0239019	0.0207488	0.0195926	0.0302246	0.0299479	0.0289076	0.0296533	0.0393184	0.0362001	0.0245175	0.0261221	0.0215645	0.0236419	0.0254956	0.0229203	0.0174278	0.0193819
0.0174021	0.0180323	0.0192776	0.0197248	0.0243888	0.0241326	0.0206455	0.0225257	0.0237607	0.0245069	0.0191221	0.0184323	0.0176274	0.0171363	0.0194342	0.0206235	0.0201968	0.0238254	0.0206603	0.0166033	0.0257781	0.0217608	0.0196524	0.0217103	0.0247412	0.0245973	0.0241912	0.0261433	0.0219143	0.0227584	0.0223254	0.0211678	0.0239197	0.0248224	0.0202567	0.0190046	0.0190839	0.0176533	0.0219393	0.024166	0.0297489	0.0248557	0.0206662	0.0209703	0.0188392	0.0194035	0.0256678	0.0214697	0.0170887	0.0162419
0.0109168	0.00820463	0.00794296	0.00728512	0.00758199	0.00690635	0.0101149	0.00771896	0.00697306	0.0057199	0.0120204	0.0116621	0.0122777	0.0102104	0.0103215	0.00925364	0.0142626	0.0140893	0.00963952	0.0111374	0.0156994	0.0161389	0.00815121	0.00878677	0.0116866	0.013867	0.0131661	0.0142984	0.0143226	0.0140455	0.0139143	0.0184002	0.0177597	0.0206229	0.016969	0.0120541	0.0213263	0.0165803	0.0199682	0.0235358	0.0135932	0.0143035	0.0140285	0.0142699	0.013789	0.0128437	0.0183635	0.0167608	0.010046	0.0111439
0.0125251	0.0114472	0.0145405	0.0138696	0.0173194	0.0192514	0.0158532	0.017399	0.0169089	0.0191867	0.0149828	0.0151425	0.0150906	0.0153692	0.0154124	0.0167056	0.0115593	0.0162353	0.0143282	0.0137438	0.0238739	0.0205632	0.0139686	0.0165047	0.0182757	0.01865	0.0182995	0.0217739	0.0193336	0.0218143	0.0182655	0.0186097	0.0177426	0.0179685	0.0186747	0.0158571	0.0220809	0.0182717	0.0247843	0.0265147	0.0375246	0.0323763	0.0164481	0.0166321	0.0148102	0.0139852	0.0186906	0.016476	0.0129097	0.0133591
0.0207684	0.0185428	0.023697	0.0212341	0.0278336	0.0265003	0.02745	0.0281732	0.0294841	0.0293574	0.0219701	0.026039	0.0241858	0.025367	0.0239353	0.0251619	0.0271997	0.0294052	0.0243175	0.0219131	0.0352939	0.0299494	0.0249059	0.0270796	0.0318097	0.0292865	0.0290918	0.0307102	0.0330894	0.0330968	0.0274098	0.0269827	0.0269718	0.02934	0.0222528	0.0205473	0.0348703	0.0327671	0.0293112	0.0320509	0.0409061	0.0370645	0.0265501	0.0251362	0.028557	0.0273044	0.0268283	0.0249071	0.0216288	0.0231939
0.0122377	0.010409	0.0100641	0.00890171	0.0101322	0.00941376	0.0124272	0.00882299	0.00951029	0.00832213	0.0143721	0.0137069	0.0163856	0.0131056	0.0128762	0.0113517	0.0180281	0.0175988	0.0131621	0.0145513	0.0190916	0.0194368	0.0101276	0.0101725	0.0154236	0.0169451	0.0165797	0.0177355	0.0180939	0.0177965	0.0164601	0.0221731	0.0208105	0.0239508	0.0186741	0.0139021	0.0232485	0.0169884	0.0234499	0.0254513	0.0172436	0.0167191	0.0178463	0.0183334	0.0147101	0.0151409	0.0223276	0.0204218	0.0119603	0.0133097
0.010556	0.00888752	0.00903859	0.00852705	0.00883524	0.00802176	0.0113062	0.00902971	0.00780223	0.006599	0.0128622	0.0134995	0.0155855	0.0121941	0.0134427	0.0110727	0.0153043	0.014961	0.012326	0.0130595	0.0174174	0.0169206	0.00957689	0.00957177	0.0134387	0.0149707	0.0154162	0.0157434	0.017625	0.0156664	0.014891	0.0194794	0.0174897	0.020273	0.015707	0.011749	0.0246647	0.0201187	0.0212004	0.0255126	0.0167112	0.0181699	0.0157081	0.0166307	0.0145767	0.015258	0.0199922	0.0188061	0.01131	0.0132247
0.0116314	0.00967349	0.00871103	0.00862928	0.0084086	0.00786914	0.0112317	0.0092394	0.00827176	0.00673868	0.0117636	0.0127816	0.0135683	0.0111787	0.011056	0.00986953	0.0136234	0.0150994	0.0120509	0.0134107	0.0157582	0.0159327	0.00956471	0.00981901	0.0124267	0.0140232	0.0135692	0.013965	0.0150865	0.0145559	0.0139343	0.0201205	0.0185097	0.0202355	0.0138227	0.00980831	0.02116	0.0166773	0.0188268	0.0233435	0.0124577	0.0151175	0.0146988	0.0143543	0.014167	0.0131827	0.0187692	0.0168276	0.0112668	0.0122
0.0125732	0.00894274	0.00860036	0.00855178	0.00891772	0.00817313	0.0115668	0.00774324	0.00795691	0.00697538	0.0119096	0.0116312	0.0135113	0.0106918	0.0114837	0.0100604	0.0155374	0.0147868	0.0114392	0.0124767	0.0180147	0.0176358	0.00968674	0.00845011	0.0127018	0.0146799	0.0130396	0.0144652	0.0168465	0.0161179	0.0151722	0.0199913	0.0193476	0.022388	0.0171831	0.0121911	0.0214658	0.0164734	0.0194216	0.0243804	0.0144776	0.0166408	0.0160675	0.0171532	0.0131739	0.0130068	0.0219686	0.0197023	0.0114149	0.0115584
0.00921473	0.00776342	0.00810632	0.00684352	0.00756753	0.00665909	0.0090178	0.00754847	0.00701369	0.00599866	0.0117462	0.0116085	0.0133357	0.0114315	0.0111416	0.00935692	0.0132178	0.0138804	0.00813989	0.0107191	0.0161696	0.0166769	0.0082862	0.00821982	0.012547	0.0143691	0.0136858	0.014133	0.0160614	0.0158358	0.0148922	0.0195386	0.0153391	0.0193399	0.0156915	0.0128906	0.0189394	0.0159852	0.0200105	0.0244047	0.0135031	0.0161935	0.0143597	0.0145872	0.0114736	0.0126801	0.0186263	0.017552	0.00882421	0.0104803
0.0149348	0.0161413	0.0178983	0.0170136	0.0222701	0.0229172	0.0194517	0.0214011	0.0220667	0.0230111	0.0162923	0.0192292	0.0174821	0.0189525	0.0199351	0.0206433	0.0190718	0.0218252	0.0197202	0.0172452	0.0229731	0.0201093	0.018729	0.0209673	0.0219847	0.0234722	0.0230376	0.0240313	0.0229633	0.0250596	0.0213819	0.0208344	0.0223675	0.0222782	0.0203389	0.0188472	0.0260694	0.024875	0.025024	0.025791	0.0351472	0.0295777	0.0208686	0.021013	0.0204232	0.0193072	0.0228408	0.0196203	0.0174688	0.0175473
0.0199585	0.017289	0.0219393	0.0213911	0.0252574	0.0244935	0.0235781	0.0253511	0.0250371	0.0268708	0.0202139	0.022967	0.0185701	0.0214246	0.0219843	0.0225784	0.023054	0.0250071	0.021389	0.0203784	0.0261455	0.0237533	0.0214713	0.0232771	0.0263617	0.0269165	0.0261068	0.0275396	0.0272204	0.0287573	0.0262291	0.0263788	0.0287966	0.03086	0.0254562	0.0230315	0.0218713	0.0246715	0.0256488	0.0276197	0.0324342	0.0329732	0.0244294	0.0268616	0.0233898	0.0232928	0.0247688	0.0233806	0.0207838	0.020843
0.0183052	0.01602	0.0186803	0.0183577	0.0261678	0.0254173	0.0209706	0.0214776	0.0241569	0.0274406	0.0194381	0.0200361	0.0198335	0.0193858	0.0208249	0.022272	0.0264205	0.0275874	0.0213821	0.0189002	0.0310817	0.0285745	0.0202535	0.0235166	0.0267648	0.0274325	0.0282389	0.0296133	0.0296787	0.0304557	0.0229285	0.023932	0.022517	0.0244057	0.0197176	0.017705	0.0324568	0.0318176	0.0301032	0.0306759	0.0381711	0.0357954	0.0254299	0.0240983	0.0238785	0.024198	0.0264451	0.0238619	0.0207147	0.0215888
0.0128362	0.0101629	0.00972027	0.00934379	0.0100112	0.00936835	0.013025	0.010805	0.00906228	0.00770242	0.0138447	0.0142998	0.0165449	0.0134439	0.0137504	0.0117574	0.0169797	0.0164881	0.0133692	0.0150793	0.0193097	0.0188469	0.0103698	0.0113557	0.0151552	0.017999	0.0156759	0.0173064	0.0199373	0.0182598	0.0200452	0.0243241	0.0210537	0.0225907	0.016051	0.0119059	0.0254984	0.0205115	0.0231869	0.0274671	0.0167858	0.0187143	0.0170951	0.0170083	0.0142972	0.0138167	0.0218722	0.0189743	0.0116439	0.011337
0.00946947	0.00812455	0.00788477	0.00744127	0.00817159	0.00724253	0.00876249	0.00746944	0.00726255	0.00593488	0.0119724	0.0121281	0.0128244	0.0110118	0.0113116	0.00944488	0.0148732	0.0147431	0.0112116	0.012352	0.0161196	0.0164335	0.00876956	0.00939605	0.0130285	0.015553	0.0133401	0.015002	0.0152358	0.0149596	0.0114484	0.0183261	0.0152862	0.0189361	0.013929	0.0108477	0.020428	0.0165791	0.0194835	0.0251385	0.0137474	0.0150313	0.0122396	0.0142462	0.0110329	0.012253	0.0173946	0.0154467	0.010128	0.0114116
0.0147826	0.0151411	0.0189796	0.0169539	0.0252157	0.0248906	0.0220966	0.0226059	0.0255594	0.0268673	0.0199526	0.0205281	0.0190594	0.0198147	0.0197477	0.0218483	0.0189239	0.0222086	0.0190162	0.0147498	0.0272782	0.0252444	0.0208853	0.0225724	0.0271655	0.0281409	0.0248703	0.0274112	0.0234918	0.0247092	0.0241118	0.0245445	0.0221578	0.022445	0.0241891	0.0206752	0.0260314	0.023947	0.0259875	0.0265686	0.0351466	0.030721	0.0228314	0.0220479	0.0205503	0.020049	0.0238894	0.0208282	0.0173586	0.0162776
0.0170384	0.0151848	0.0182252	0.0178008	0.0234437	0.0225112	0.0214656	0.0220338	0.0224247	0.0235578	0.0182043	0.0188282	0.0183877	0.018913	0.0186913	0.0204485	0.0203627	0.0226198	0.0202727	0.0179828	0.0263466	0.0243743	0.0183072	0.0196181	0.0225889	0.0232187	0.0252588	0.0250841	0.0242617	0.0255892	0.0186973	0.0187703	0.0218457	0.0231857	0.0154744	0.0149225	0.0264597	0.023085	0.024368	0.0259984	0.0334576	0.0293341	0.0197199	0.0205987	0.0181816	0.0202072	0.0214737	0.0216696	0.016177	0.0163693
0.0158877	0.014977	0.0185329	0.0173731	0.0243998	0.0251615	0.0201942	0.0223933	0.0225801	0.0250488	0.0193984	0.0196712	0.0186837	0.0187864	0.0194794	0.0200926	0.0202821	0.0224559	0.019419	0.0157334	0.0262047	0.0256709	0.0183687	0.0202195	0.0244447	0.0252767	0.0248378	0.0266415	0.0246016	0.0252475	0.0217228	0.0214578	0.0206262	0.023082	0.0180658	0.0161907	0.0264571	0.0251766	0.0249542	0.025714	0.0328427	0.0303333	0.0213374	0.021228	0.0199743	0.0201994	0.0213148	0.0188791	0.0172704	0.019254
0.0105188	0.00889057	0.00859125	0.00782078	0.00905293	0.00808371	0.0111859	0.00888119	0.00820235	0.00677718	0.0136967	0.0128085	0.0148967	0.0123166	0.0127263	0.0110595	0.0155258	0.0141372	0.0100036	0.0118113	0.0161	0.0158647	0.00986719	0.00976003	0.0132145	0.0142924	0.014515	0.0153724	0.0160758	0.014759	0.0161695	0.0196538	0.0162442	0.018594	0.0145733	0.0103027	0.0203137	0.0155612	0.0191408	0.0215333	0.013502	0.0143535	0.0124513	0.0129585	0.0117588	0.0113291	0.0183234	0.0170552	0.00847971	0.0101906
0.0103607	0.00903719	0.00965109	0.00903245	0.00939568	0.00911961	0.0115004	0.00915803	0.00937023	0.00713036	0.0131774	0.0118773	0.014352	0.0116528	0.0125267	0.0113337	0.0156119	0.0149988	0.0116126	0.0132889	0.0191167	0.0185409	0.00956821	0.010622	0.0152548	0.0169522	0.0151184	0.0169243	0.0184215	0.0172707	0.0172192	0.0213144	0.0178675	0.02025	0.0176807	0.0123571	0.0249897	0.0198232	0.0209499	0.024041	0.0155308	0.0160292	0.0176685	0.0188503	0.0145193	0.015935	0.0203586	0.020968	0.0121071	0.0135802
0.0107963	0.00829695	0.0085434	0.00755952	0.00857601	0.00787618	0.00989817	0.00832477	0.00837308	0.0065323	0.0131257	0.0129302	0.0157047	0.0113128	0.0128007	0.00973092	0.0173189	0.0178641	0.0109938	0.0127765	0.0182222	0.018868	0.00855741	0.00961065	0.0136445	0.0150383	0.013731	0.015322	0.0187831	0.0172466	0.0164279	0.0209843	0.0184382	0.0227142	0.0192703	0.0145225	0.0234751	0.0164956	0.0220861	0.0265621	0.0176493	0.016721	0.0176188	0.0181365	0.0150663	0.0160243	0.0214046	0.019929	0.0128962	0.0137807
0.0116333	0.00955259	0.00957822	0.00944736	0.00978451	0.00849631	0.0119811	0.00983025	0.00890731	0.00751505	0.0146339	0.0136161	0.0164377	0.0138781	0.0133602	0.0114182	0.014631	0.0165677	0.0117996	0.0142577	0.0183932	0.0186121	0.0094062	0.0105414	0.0129264	0.0149423	0.0145395	0.0156752	0.0175649	0.0161483	0.0155535	0.0232239	0.0196274	0.0219662	0.0189117	0.0131016	0.023306	0.0199698	0.0224277	0.0263973	0.0171829	0.0175316	0.0138167	0.0146753	0.0123671	0.0128896	0.0183067	0.0167245	0.0111203	0.0122792
0.0166473	0.0157198	0.0177669	0.0176123	0.0216528	0.0221654	0.0215612	0.0228289	0.0229396	0.0210342	0.0177476	0.0176098	0.0184944	0.0178954	0.0189174	0.0184806	0.0181666	0.0204269	0.0182246	0.0163861	0.026481	0.0246952	0.0191137	0.0215155	0.0211539	0.0209401	0.0234088	0.0241181	0.0243113	0.0240293	0.0208916	0.0204832	0.0228716	0.0238003	0.019841	0.0206052	0.0250454	0.0241077	0.024033	0.026441	0.0328549	0.0325436	0.0213852	0.0227002	0.019903	0.0183813	0.0243405	0.0206121	0.0182234	0.0189688
0.00719324	0.00593844	0.00484991	0.00517808	0.00532655	0.00469258	0.00662688	0.00467226	0.00489451	0.00411555	0.00857773	0.00814494	0.00945588	0.00767503	0.00746757	0.00638425	0.0098404	0.0107145	0.00555163	0.00746503	0.0111878	0.0118074	0.00494366	0.00563997	0.00844888	0.0100037	0.00883433	0.0101639	0.0110118	0.0103405	0.00966163	0.0134104	0.0131589	0.0151509	0.011343	0.00825701	0.0146303	0.0119886	0.0133048	0.0178215	0.00959715	0.0114807	0.00881092	0.0092003	0.00698246	0.00788354	0.0129879	0.0126529	0.00661814	0.00726112
0.00998419	0.00866192	0.00781268	0.007392	0.00830752	0.00743567	0.00989511	0.00888636	0.00765798	0.00600209	0.0124697	0.0134169	0.014173	0.0117197	0.01157	0.0098601	0.0153722	0.0153148	0.0103192	0.0115495	0.016634	0.0164048	0.00900315	0.00994059	0.0133661	0.0150306	0.0135016	0.0149634	0.0158371	0.0144168	0.0153875	0.0203556	0.0175737	0.0209825	0.0162726	0.0103864	0.02003	0.0146466	0.0164286	0.0177909	0.0119083	0.0123653	0.0146663	0.0143109	0.0133148	0.0132283	0.0186146	0.0166534	0.0104693	0.0121614
0.0160928	0.0160151	0.0193636	0.0194438	0.0237067	0.0247039	0.0191006	0.0212169	0.0235001	0.0261896	0.017219	0.0194992	0.0178271	0.017	0.022619	0.0212124	0.0211986	0.0227393	0.0213813	0.0169203	0.0279334	0.0264493	0.0202422	0.0217709	0.0256809	0.0265309	0.0237456	0.0248273	0.0245365	0.0259124	0.0236448	0.0227163	0.0230311	0.023882	0.0179061	0.0164841	0.0278933	0.0266207	0.0266485	0.028944	0.0324655	0.0310568	0.0212219	0.0225173	0.0186144	0.0193351	0.0246697	0.0217063	0.0169059	0.0171463
0.00998569	0.00864193	0.00801652	0.00714317	0.00810706	0.0067731	0.00982406	0.00760222	0.00754096	0.00621208	0.0124762	0.0121159	0.0135383	0.0108824	0.0116062	0.00943667	0.014456	0.0147785	0.00952893	0.0108945	0.0152664	0.0159457	0.00775265	0.00846028	0.0120381	0.0130143	0.0125846	0.0140453	0.0155592	0.0139029	0.0136143	0.0188006	0.0176688	0.0197174	0.015177	0.0112107	0.0165492	0.0146718	0.0179402	0.0228891	0.012191	0.0138715	0.0147416	0.0154074	0.0126608	0.0126039	0.0187568	0.0164543	0.00983313	0.0104922
0.0156933	0.0157312	0.0175165	0.0169152	0.0235116	0.0228213	0.0192298	0.0204438	0.0220383	0.0232077	0.017532	0.0172857	0.0186387	0.0182248	0.0201298	0.0205974	0.0188156	0.0203817	0.0182519	0.0148713	0.028054	0.0231294	0.0168379	0.0197577	0.0221752	0.0229617	0.0224973	0.0241603	0.024582	0.0260398	0.0209209	0.0198008	0.0178227	0.0197112	0.0176087	0.0174038	0.0267894	0.0237971	0.024701	0.0268772	0.0343319	0.0313346	0.0256153	0.0227024	0.0234263	0.0153062	0.0255458	0.0188325	0.0188868	0.0153175
0.0165809	0.0142173	0.0158034	0.0155654	0.0230521	0.0203831	0.02052	0.021693	0.0229347	0.0220145	0.0169592	0.0189022	0.0179021	0.0185377	0.0189032	0.0181684	0.019532	0.0210865	0.017979	0.0149417	0.0261155	0.0244118	0.0184795	0.0195176	0.0231115	0.0221496	0.0219107	0.0230873	0.0263695	0.0262326	0.0199742	0.0208386	0.021578	0.0230052	0.0174674	0.0169197	0.0306787	0.0243057	0.0277651	0.0267343	0.0373932	0.0300096	0.0199398	0.0196642	0.0185244	0.0178109	0.0237632	0.020674	0.0175477	0.0160425
0.0156513	0.0145487	0.0167977	0.0159496	0.0235883	0.022473	0.0185322	0.0197682	0.0225763	0.0234253	0.0185148	0.0176602	0.0169994	0.0169813	0.0194619	0.0205872	0.0201112	0.0213411	0.0191097	0.0157288	0.0246596	0.0243692	0.0192671	0.0205533	0.0242112	0.0230583	0.023659	0.0251681	0.0245485	0.0239706	0.0221003	0.021717	0.0225244	0.0220524	0.0205558	0.0180542	0.0256878	0.0243839	0.0275925	0.0278068	0.039037	0.0331329	0.0258579	0.0243638	0.0217923	0.0212213	0.0243203	0.0216065	0.0197082	0.018917
0.0103037	0.00883841	0.00804501	0.00762301	0.00858262	0.00779641	0.0102184	0.00854866	0.00809776	0.00670977	0.012148	0.0137813	0.0140066	0.0120156	0.0119894	0.0110475	0.0149849	0.0144588	0.0105475	0.0113799	0.0178139	0.0177004	0.00885389	0.00958612	0.0131626	0.0152075	0.0143997	0.0150297	0.0174812	0.0176615	0.0154202	0.0204765	0.0185503	0.020956	0.017226	0.0113884	0.0226187	0.0180764	0.0210323	0.0261249	0.0164631	0.0166614	0.0153932	0.0153619	0.0134949	0.0140374	0.0187097	0.0172202	0.012385	0.0130947
0.0175213	0.0159964	0.0206087	0.019116	0.0253345	0.0239549	0.0221991	0.0226295	0.025012	0.0253049	0.0192622	0.020975	0.0194025	0.0199688	0.0218148	0.0230757	0.0215095	0.0236052	0.0217391	0.0216215	0.0322335	0.0286801	0.0211139	0.0235603	0.0270495	0.025116	0.0267604	0.0287774	0.0278654	0.0281119	0.0239738	0.02388	0.0229884	0.0251446	0.0190944	0.018352	0.0340366	0.0314398	0.0300157	0.0304705	0.0384367	0.0325981	0.0228238	0.0211386	0.0234413	0.0221785	0.0236771	0.0202466	0.01671	0.0166271
0.015847	0.0114645	0.00999114	0.0090932	0.0103399	0.00907346	0.0139785	0.0104758	0.0103983	0.00781027	0.0183874	0.0172464	0.0238668	0.0165441	0.0219669	0.0128582	0.0184726	0.0161787	0.0149272	0.0137979	0.018963	0.01793	0.0110684	0.0109342	0.0159107	0.0173008	0.0173916	0.017524	0.0236425	0.0200849	0.0191535	0.0221798	0.0226465	0.0217745	0.0166266	0.0115704	0.0238942	0.0205096	0.0238001	0.0262854	0.0188118	0.0188739	0.0200426	0.0196945	0.0180509	0.0163323	0.0212934	0.0195753	0.0118212	0.0143239
0.013097	0.0135513	0.0156111	0.0157032	0.0212515	0.0205594	0.0174283	0.0187851	0.0203076	0.0220288	0.0151599	0.015211	0.0146578	0.0158704	0.0168109	0.0183432	0.0148299	0.0194896	0.0164251	0.0162808	0.0242505	0.0233772	0.0166978	0.0185346	0.0211869	0.0221152	0.0214664	0.0222872	0.0206016	0.0226672	0.0208383	0.0198508	0.0198209	0.0218039	0.0180574	0.0181355	0.0183682	0.0192508	0.0254239	0.0262651	0.034394	0.0312492	0.0204962	0.0221547	0.0196092	0.0201299	0.0222955	0.0191808	0.0141293	0.0173742
0.0188329	0.0166027	0.0198864	0.0191912	0.0225269	0.0242547	0.0216523	0.0227487	0.0234069	0.0255364	0.0194563	0.0205533	0.0196332	0.0196718	0.022342	0.0220346	0.0212687	0.0236202	0.0217154	0.0196157	0.0278765	0.0287809	0.0201901	0.0220007	0.0250517	0.025113	0.0235666	0.026853	0.0254472	0.0271942	0.02303	0.024291	0.0254966	0.0270001	0.0217846	0.0226598	0.0304465	0.029	0.029834	0.0308881	0.0365673	0.0354865	0.0255799	0.0229652	0.0227539	0.0228024	0.0274181	0.0235699	0.0197316	0.0191899
0.0127896	0.0105258	0.0100083	0.00878427	0.00865489	0.00767206	0.0102971	0.00834829	0.00853593	0.00664878	0.0126921	0.0120566	0.0135542	0.0114586	0.0114233	0.00931238	0.0155349	0.0158789	0.0117802	0.0146834	0.0186737	0.0190942	0.0090088	0.010162	0.0135593	0.0149287	0.0144622	0.0149963	0.0173049	0.0176363	0.0144018	0.0203016	0.0183587	0.0226327	0.0180529	0.0131141	0.0221716	0.0182012	0.0211237	0.0272086	0.0141809	0.0162366	0.0162538	0.0184312	0.0153581	0.0155718	0.0215555	0.019119	0.0116337	0.0124654
0.0131637	0.0108246	0.0108755	0.0104439	0.0107572	0.00924218	0.013253	0.010633	0.00898435	0.00790757	0.0155238	0.0154521	0.0170608	0.0144077	0.014336	0.0128232	0.0182799	0.0167509	0.0144253	0.0150904	0.0193118	0.0183818	0.0106066	0.0109609	0.0147541	0.0169434	0.0166885	0.01682	0.0213519	0.0197323	0.0183171	0.0224396	0.0209951	0.0225733	0.018671	0.0124293	0.0247284	0.020671	0.0225301	0.026383	0.0165447	0.0189889	0.0159467	0.0164697	0.0158052	0.0157284	0.0193561	0.0181	0.0126713	0.0137857
0.0203564	0.0194755	0.0209532	0.0205153	0.0259492	0.0281228	0.0232742	0.0240837	0.0258863	0.0267664	0.0194449	0.0205987	0.0200459	0.0195227	0.0210398	0.0218848	0.0195223	0.0224991	0.0218835	0.0197202	0.0308592	0.0292535	0.0214851	0.0228019	0.0263041	0.0278167	0.025663	0.0298664	0.0280839	0.0285447	0.0260748	0.0261816	0.0253424	0.0274087	0.0238276	0.0216947	0.0320768	0.0287492	0.0306081	0.0317435	0.0415931	0.0381559	0.0263925	0.0274235	0.0251853	0.0235635	0.0273114	0.0239386	0.0207374	0.0215605
0.0174706	0.0160503	0.019812	0.0189482	0.0261158	0.0235839	0.0221242	0.0231964	0.0272285	0.0281373	0.0197219	0.0206931	0.0195366	0.0202831	0.0227798	0.0248751	0.021846	0.0242762	0.0210078	0.0176574	0.0338365	0.03077	0.0197283	0.020462	0.0269616	0.0252413	0.0266908	0.02651	0.0274883	0.0294789	0.024814	0.0233714	0.0246478	0.0259262	0.0181331	0.0162676	0.0288879	0.0277042	0.0287461	0.0291127	0.0364727	0.0333694	0.0260473	0.0273103	0.0245055	0.0234379	0.0245142	0.0231778	0.018557	0.0217634
0.013198	0.0106492	0.0106212	0.0098816	0.0111536	0.00994953	0.0141745	0.011362	0.00991275	0.00857828	0.0152251	0.0151826	0.0177603	0.0145692	0.0144465	0.0128645	0.0175488	0.0156968	0.0128842	0.012321	0.0190162	0.0178367	0.00995589	0.0114013	0.014867	0.0171256	0.0153691	0.0179288	0.0199899	0.0193418	0.0202311	0.0237872	0.0203658	0.0220736	0.0188597	0.0121558	0.0236147	0.0201609	0.021546	0.0250345	0.0172137	0.0181106	0.0184896	0.0181716	0.0164238	0.0176701	0.0211177	0.0188918	0.0132227	0.0149411
0.0100639	0.00846592	0.00815854	0.00809678	0.00798468	0.0070843	0.00968144	0.00773036	0.00712043	0.00547387	0.0110693	0.010711	0.0123011	0.00990585	0.00989414	0.00851548	0.015014	0.0136182	0.0104637	0.0115642	0.01547	0.0155243	0.00770961	0.00890177	0.0125315	0.0139794	0.0136254	0.0139689	0.0158678	0.0132544	0.0131728	0.0196368	0.0163623	0.0194055	0.0136184	0.00975011	0.0198019	0.0151475	0.0173291	0.0200269	0.0136061	0.0144708	0.0143715	0.0146735	0.0124285	0.0127324	0.0182455	0.0168713	0.0105453	0.0121632
0.0145577	0.0144103	0.017882	0.0161268	0.0214007	0.0215488	0.0178162	0.0200798	0.0211564	0.0213809	0.0156041	0.0168901	0.0163255	0.0158926	0.0175895	0.0186565	0.0169505	0.019753	0.0185495	0.0157847	0.0283154	0.0253763	0.0177595	0.0196955	0.0218866	0.0223533	0.0232697	0.0235012	0.0247726	0.0253633	0.0204482	0.0193614	0.0190694	0.0210522	0.0166679	0.0143395	0.0284453	0.0266346	0.0265913	0.0264951	0.0369842	0.0319501	0.0192717	0.0195523	0.0184386	0.0174997	0.0227761	0.0177157	0.0150769	0.0131
0.015082	0.0155063	0.0174905	0.0149958	0.0226333	0.0227977	0.0189651	0.0187786	0.0215852	0.0224052	0.0178035	0.0175525	0.0169306	0.0162533	0.0193299	0.0193615	0.017101	0.019322	0.0179354	0.0153713	0.0240498	0.0230973	0.0169214	0.0179563	0.022702	0.0211574	0.0253035	0.0253439	0.0206363	0.0218541	0.0213847	0.0208746	0.0237931	0.0240504	0.0192239	0.0151757	0.0268229	0.0226628	0.02684	0.0259515	0.0320534	0.0269159	0.0219767	0.0213321	0.0210939	0.021173	0.0217815	0.0211233	0.017344	0.0168307
0.0163325	0.0151382	0.0183561	0.0172254	0.0230807	0.0221086	0.0202042	0.0220567	0.0236075	0.024432	0.0203196	0.0206388	0.0186949	0.0187728	0.0219465	0.0217369	0.0215227	0.0220208	0.0197641	0.0166807	0.0268928	0.0232911	0.0200913	0.0213732	0.0257833	0.0236971	0.025252	0.0267024	0.0262192	0.0266865	0.0232033	0.0226383	0.0235901	0.0230519	0.0192668	0.0173488	0.028232	0.0243313	0.0271243	0.0281013	0.0368669	0.0325531	0.0213757	0.0205694	0.0195059	0.0190416	0.02225	0.0189704	0.0150591	0.0148556
0.0130922	0.010011	0.00959136	0.00967861	0.00931432	0.00903148	0.0117358	0.00931329	0.00836971	0.008081	0.0136709	0.0137641	0.0149994	0.0129128	0.0126665	0.0111653	0.0162971	0.0158531	0.0134594	0.0130646	0.016768	0.0180343	0.010023	0.0101943	0.0129926	0.0147565	0.0152939	0.0163774	0.018034	0.0164639	0.0162814	0.0210228	0.0195119	0.0231357	0.0182259	0.0143084	0.0219851	0.0184663	0.0208333	0.0251756	0.0152292	0.017119	0.0187061	0.0206858	0.0170446	0.0169925	0.0224958	0.0206768	0.0130244	0.0145105
0.0113687	0.0103416	0.0108176	0.0106239	0.0106673	0.00950135	0.0139147	0.00973705	0.00968481	0.00770335	0.0134468	0.0134287	0.0160398	0.0127344	0.0130867	0.010784	0.0166454	0.0168998	0.0119768	0.0153326	0.0193976	0.0199622	0.0109372	0.0120724	0.013956	0.0162211	0.0152814	0.0160605	0.0181611	0.0182542	0.0179481	0.0228102	0.0229712	0.0244594	0.023326	0.0153217	0.020316	0.0184505	0.020835	0.0270801	0.0166005	0.018065	0.0193972	0.0181656	0.017072	0.0153681	0.0236417	0.0192675	0.0122061	0.0152859
0.00959347	0.00794055	0.00731129	0.00801053	0.00860666	0.00798796	0.0117376	0.00944953	0.00736174	0.00637762	0.0129514	0.0119908	0.0135379	0.0102837	0.0120656	0.0101239	0.0157282	0.0149135	0.0102744	0.0116354	0.0172378	0.0166578	0.00896671	0.00946433	0.0127106	0.0135892	0.0134837	0.0150069	0.0180605	0.016631	0.0158106	0.018617	0.0175997	0.0191394	0.016216	0.010691	0.0237658	0.0195813	0.0214456	0.0245809	0.0148802	0.0162646	0.0127132	0.0137232	0.0118031	0.0113374	0.0168	0.0157282	0.0088832	0.0122298
0.0184468	0.0163434	0.0196331	0.0181124	0.0265887	0.0250605	0.0216733	0.0226654	0.0239394	0.0228218	0.0198687	0.0193964	0.01975	0.0174014	0.0190978	0.0188314	0.022386	0.022255	0.0184623	0.0161758	0.0270576	0.0279983	0.0198041	0.0207852	0.0269756	0.0244331	0.0258958	0.0259414	0.0248666	0.0235973	0.0271465	0.0249319	0.0258776	0.0246236	0.0242056	0.0213538	0.0245538	0.0193047	0.0274467	0.0286955	0.035772	0.0305205	0.0224309	0.0239714	0.0199518	0.020008	0.0245805	0.0218477	0.0176127	0.017387
0.0175799	0.018434	0.0195083	0.0190836	0.0238405	0.0242797	0.0195525	0.0213306	0.0258169	0.0243998	0.0224426	0.0204695	0.0185924	0.0185434	0.0213771	0.0217684	0.0208313	0.0246174	0.0215039	0.0195582	0.0274204	0.0232061	0.0207521	0.0240869	0.0282182	0.0259102	0.0254762	0.0264869	0.0272878	0.0280232	0.022079	0.0217033	0.0225256	0.0239163	0.017243	0.01622	0.0282084	0.0260641	0.0286044	0.0293071	0.0378931	0.0338875	0.0251501	0.0232478	0.0205745	0.0210066	0.0264299	0.0226053	0.0179375	0.0174363
0.0115092	0.00945612	0.00933417	0.00856494	0.00933042	0.0084794	0.0119769	0.00955059	0.00830997	0.00680543	0.0120545	0.0119684	0.0146615	0.0120621	0.0134365	0.0105357	0.0160048	0.0155001	0.0112973	0.0127542	0.0175234	0.0177295	0.00967439	0.0107514	0.0143042	0.016554	0.0148125	0.0145021	0.0174419	0.0168788	0.0170148	0.0209343	0.0205011	0.02142	0.0202921	0.0146407	0.0262117	0.0212649	0.0239712	0.0297781	0.0146223	0.0161228	0.0168358	0.0180717	0.0165542	0.016858	0.0208677	0.0208435	0.0140801	0.0145398
0.0118716	0.0099939	0.00806825	0.00854658	0.00898168	0.00804975	0.0119203	0.00927538	0.00778168	0.00641537	0.0134432	0.0134995	0.0157117	0.0125853	0.0131643	0.0109366	0.0164596	0.0166463	0.013597	0.0137597	0.0168378	0.0166112	0.00873399	0.00792981	0.0133441	0.0144576	0.0148206	0.0156876	0.0204341	0.0183638	0.0180116	0.0203278	0.0211373	0.0213031	0.0155909	0.0104607	0.0223974	0.0200385	0.0214229	0.0243876	0.015971	0.0184887	0.0165508	0.0174459	0.0143316	0.0151129	0.0201026	0.0187554	0.0113136	0.0123974
0.0160853	0.0156825	0.0189594	0.0180167	0.0244364	0.0244261	0.0214077	0.0214677	0.0258483	0.0255322	0.0176489	0.020331	0.0196355	0.0202051	0.0228257	0.0225734	0.0212012	0.0229703	0.0201364	0.0169016	0.0299995	0.0282279	0.0204071	0.0211772	0.0278862	0.0271818	0.0276833	0.0282882	0.0265116	0.0277683	0.0252287	0.0247171	0.0242064	0.0235715	0.0226438	0.0203616	0.03109	0.0286191	0.030577	0.0298725	0.0415831	0.0360467	0.0250958	0.0251535	0.0225322	0.0221816	0.0251669	0.021511	0.0173735	0.0189385
0.0171903	0.015268	0.0202112	0.0184502	0.0236041	0.0224992	0.0213843	0.0223915	0.0237481	0.0249341	0.0185645	0.0218255	0.0192156	0.0191752	0.0219796	0.0218821	0.0190187	0.021238	0.0198388	0.0198245	0.0278432	0.0273759	0.0191954	0.0215706	0.0242055	0.0239193	0.02399	0.0252551	0.0261762	0.0258143	0.0247561	0.0253634	0.0236048	0.02778	0.0175868	0.0177878	0.0280709	0.0273988	0.0283575	0.0273701	0.0330021	0.030793	0.0226132	0.0224848	0.0214282	0.0200058	0.0241177	0.0220518	0.0173565	0.0172917
0.0115296	0.0111953	0.0145345	0.013578	0.0184415	0.0193777	0.016872	0.0177711	0.0191683	0.0205777	0.0155993	0.0142689	0.0147371	0.0144061	0.0165547	0.0164711	0.0168875	0.0183526	0.0152639	0.0130198	0.0240831	0.0230606	0.0165438	0.0178997	0.0219883	0.0224529	0.0202822	0.020491	0.0214468	0.0221422	0.0189913	0.0186828	0.017232	0.0188259	0.0154354	0.014757	0.0246954	0.0236263	0.019736	0.0233078	0.0302393	0.0268703	0.0158888	0.014654	0.0163097	0.0147604	0.0169515	0.0141011	0.0119936	0.0128837
0.0153775	0.0157016	0.0164525	0.0176942	0.0208573	0.0211299	0.0188205	0.0202121	0.0196902	0.022271	0.0178411	0.0173943	0.017605	0.017338	0.0184233	0.0185082	0.0185959	0.0191399	0.0177223	0.0174711	0.0258039	0.0211816	0.0166857	0.0190448	0.0231705	0.0223163	0.0216839	0.0226812	0.0220631	0.0230073	0.018955	0.018331	0.0213771	0.0217094	0.013387	0.0115742	0.021499	0.0185454	0.0220076	0.0231193	0.0293176	0.0249306	0.0168663	0.0187684	0.0163114	0.0158702	0.0206652	0.0179437	0.0143219	0.0137816
0.00957707	0.00766084	0.00722644	0.00683568	0.00772355	0.00661052	0.0101836	0.00845078	0.00692634	0.00583406	0.0119719	0.0118442	0.0133908	0.0110646	0.0104384	0.00938456	0.0141238	0.0130658	0.00985902	0.011639	0.0149037	0.0143546	0.00743642	0.00884298	0.0117927	0.0126274	0.0119825	0.0123647	0.0140021	0.0123843	0.0130832	0.0166691	0.0179467	0.0200694	0.0157629	0.0116528	0.0147798	0.0127543	0.014341	0.0199752	0.0111961	0.0132844	0.0163669	0.0160478	0.0130932	0.0133453	0.0195426	0.0168654	0.0095369	0.0104823
0.0179307	0.0196224	0.0183563	0.0179702	0.0252751	0.0244906	0.0226326	0.0232168	0.0257807	0.0244003	0.0185684	0.0201936	0.0183359	0.019609	0.0219361	0.022355	0.0206317	0.0242309	0.0182236	0.0161595	0.0300621	0.0291712	0.0177696	0.0197147	0.0238008	0.0249643	0.0251572	0.0269021	0.0242951	0.0262008	0.0275369	0.0267628	0.0286019	0.0309586	0.0293681	0.0250129	0.0211978	0.0226994	0.0302268	0.028347	0.0351547	0.0309553	0.0236596	0.0244243	0.0212844	0.0226059	0.0268467	0.0222678	0.0193253	0.0200922
0.0188624	0.0179637	0.0218233	0.020175	0.0279579	0.0259099	0.0241126	0.0250138	0.02906	0.0296944	0.0212879	0.0234885	0.0228966	0.0232636	0.0247912	0.0263039	0.0270299	0.0292085	0.0217994	0.0205328	0.0337802	0.0326096	0.0213805	0.0232168	0.0310928	0.028434	0.0298376	0.0311742	0.0288565	0.0312658	0.0273428	0.0269475	0.0275228	0.0293633	0.0217818	0.01843	0.0333297	0.0308892	0.0296786	0.0316033	0.0387087	0.033839	0.0263282	0.024968	0.0239605	0.0239224	0.0283543	0.025322	0.0201957	0.0202708
0.0113001	0.0100306	0.0100572	0.00869949	0.00808495	0.00770905	0.0104622	0.00946053	0.00800245	0.00637389	0.0128101	0.0134274	0.0140628	0.0119347	0.0117104	0.0104805	0.015337	0.0152418	0.0126425	0.0147909	0.0165195	0.0175195	0.00908628	0.0103995	0.0134826	0.015322	0.0143708	0.0153771	0.0156392	0.0157487	0.0145353	0.0201125	0.0180687	0.0216906	0.0160542	0.0110049	0.0205814	0.0165261	0.0194316	0.0234483	0.0127114	0.0148078	0.0154104	0.0163047	0.0147408	0.0150552	0.0187632	0.0173792	0.0119818	0.0135859
0.018722	0.0171997	0.0179252	0.017961	0.0215338	0.0213133	0.0209494	0.0234324	0.0228119	0.0229714	0.0191919	0.0215158	0.0177817	0.0202632	0.0177965	0.016871	0.0177932	0.0225954	0.0221739	0.0186679	0.0259444	0.0227306	0.0199055	0.0221962	0.0239002	0.0239733	0.0236123	0.0245002	0.0217752	0.02391	0.0238353	0.0222992	0.0232558	0.0252249	0.0218045	0.0203393	0.0223367	0.0239001	0.0239573	0.0288514	0.0344115	0.0334533	0.0222058	0.0246224	0.0195562	0.0211826	0.0216396	0.020472	0.0173221	0.0180371
0.00828086	0.00705767	0.00652291	0.00582598	0.00696893	0.00597713	0.00735477	0.00597923	0.0067077	0.00533585	0.0107752	0.0090912	0.0116049	0.00865544	0.0102429	0.00831863	0.0130362	0.0125327	0.00786085	0.00958678	0.0125965	0.0123097	0.00706592	0.00755561	0.0105867	0.0122876	0.0108093	0.0125744	0.0131717	0.0115738	0.0112887	0.0150489	0.0128072	0.0154277	0.0115806	0.00916585	0.0176665	0.0134158	0.0160903	0.0202827	0.0118948	0.0126796	0.0120752	0.0130871	0.0101419	0.0101909	0.0157004	0.0151104	0.00797055	0.00758206
0.0155197	0.0160214	0.0185496	0.0191357	0.0226578	0.0233817	0.021393	0.0230542	0.0230689	0.0231154	0.0168941	0.0198614	0.0172258	0.0191564	0.0193249	0.020017	0.0188251	0.0210367	0.0186365	0.0188321	0.0264814	0.0238843	0.0182725	0.0212618	0.0229172	0.0222132	0.0232234	0.0233768	0.0213579	0.0228202	0.0223937	0.0222999	0.02587	0.0271893	0.0200872	0.0182616	0.0236006	0.0210546	0.0233074	0.0264535	0.029537	0.0281589	0.0191765	0.0186053	0.0182225	0.017528	0.023972	0.0188304	0.0170288	0.016187
0.0171961	0.0165718	0.0219607	0.0221372	0.0296665	0.0274659	0.0234053	0.0256275	0.0290314	0.0282741	0.022526	0.0237135	0.0223853	0.0217914	0.0240284	0.0248111	0.0254448	0.0256029	0.0234097	0.0190452	0.0334317	0.0320844	0.0245395	0.0265886	0.0307755	0.0298178	0.030759	0.0315685	0.0299141	0.0312469	0.0258947	0.0246231	0.0237728	0.0260025	0.0220735	0.0200996	0.0338241	0.0291373	0.0341451	0.0309901	0.0448521	0.0377137	0.0252347	0.0237012	0.0244752	0.023452	0.0265783	0.0221416	0.0192897	0.0184494
0.0155884	0.0158981	0.0184206	0.0195444	0.0228847	0.024237	0.0194881	0.0214774	0.0214229	0.0230713	0.0181872	0.018992	0.018598	0.0196741	0.0192697	0.0188666	0.0195107	0.0208903	0.0202559	0.0179875	0.0252821	0.0216048	0.020943	0.022194	0.0244373	0.0237405	0.0247194	0.0272105	0.0236336	0.0244766	0.0238269	0.0253139	0.0197865	0.0211805	0.02038	0.0189548	0.0302764	0.0285336	0.0303564	0.0311757	0.041996	0.0367813	0.0214757	0.0222121	0.0201938	0.0189832	0.0224694	0.020601	0.016198	0.0180332
0.017525	0.01589	0.0198708	0.0198587	0.0243791	0.0255322	0.0200563	0.0216679	0.0233882	0.0262347	0.0191964	0.0216143	0.0181647	0.0184323	0.0218149	0.0226206	0.0205176	0.0252934	0.0227064	0.0199425	0.0265168	0.0239395	0.0202595	0.0215669	0.0253558	0.0272832	0.0241565	0.0274513	0.0239645	0.0274028	0.023819	0.0223132	0.0249109	0.0241528	0.0172254	0.0161243	0.0276656	0.0270992	0.0263921	0.0268557	0.0374774	0.033328	0.0224794	0.0244528	0.0223361	0.0223091	0.0251319	0.0222189	0.0199886	0.019446
0.0168388	0.0172998	0.0188214	0.0198764	0.0226472	0.0223204	0.0202532	0.0216228	0.0203916	0.0224027	0.0195169	0.020673	0.0178739	0.0191077	0.0200456	0.0200347	0.0224565	0.0235797	0.0229953	0.0193147	0.0281122	0.0266618	0.0209712	0.0239183	0.024506	0.0239976	0.0220965	0.0242973	0.026166	0.0258459	0.0216166	0.0199269	0.022624	0.0225416	0.0187756	0.0170608	0.0321963	0.0307984	0.0276405	0.0292368	0.0388275	0.0366114	0.0270689	0.0256459	0.0229981	0.0218808	0.0250602	0.02179	0.0191862	0.0184735
0.0106742	0.00885779	0.00795308	0.00772813	0.00912665	0.00816882	0.0107587	0.00887917	0.00831667	0.00730419	0.0129366	0.0129892	0.0141981	0.0116757	0.0124897	0.0102718	0.015382	0.0146962	0.0111636	0.0120486	0.0163242	0.0159832	0.00966446	0.0099686	0.0135482	0.0152055	0.0139667	0.0151214	0.0177609	0.0171375	0.0165318	0.0202685	0.0179041	0.0201711	0.0163561	0.0108821	0.0232445	0.0190587	0.0209136	0.0249452	0.0167169	0.0165949	0.0162821	0.0161929	0.0150936	0.0146787	0.0194218	0.0173809	0.0115473	0.0127819
0.0171948	0.0170444	0.0192263	0.0189182	0.0245624	0.024747	0.021572	0.0221604	0.0268223	0.0282379	0.0189363	0.0192273	0.0205831	0.0196488	0.0223146	0.0225304	0.025162	0.02465	0.0210256	0.0207536	0.0270356	0.0278372	0.0203406	0.0234707	0.0258355	0.0266494	0.0268557	0.0273162	0.0265426	0.0275796	0.0215924	0.0224818	0.0216311	0.0238623	0.0188797	0.0180433	0.0296919	0.0313786	0.0274061	0.0316008	0.03354	0.0350733	0.0240984	0.0247767	0.0230609	0.0228479	0.0260753	0.0255207	0.0195224	0.0206944
0.0158704	0.0162564	0.0161846	0.017059	0.0240243	0.0240039	0.0186824	0.0197533	0.0220237	0.0219228	0.0176904	0.017787	0.0163466	0.0167042	0.020368	0.0200288	0.0186743	0.0221062	0.017131	0.0158399	0.0262486	0.0251764	0.0179125	0.01772	0.0256095	0.0263331	0.0263656	0.0282167	0.0235097	0.0245902	0.0240626	0.0236402	0.0225111	0.0237446	0.0183367	0.0184163	0.0240487	0.0231106	0.0271741	0.0274036	0.0330814	0.0299854	0.0221558	0.0229986	0.0200357	0.019034	0.0248353	0.0224655	0.0165055	0.0186812
0.0202572	0.0171525	0.0212303	0.0211823	0.0247421	0.023707	0.0228315	0.023496	0.0248562	0.0237691	0.0222028	0.0212644	0.0215461	0.0211331	0.021913	0.0223084	0.022687	0.0222634	0.0224859	0.0195906	0.0285726	0.0235044	0.0228096	0.0245018	0.0259686	0.0236875	0.0238245	0.0245364	0.0265922	0.0272197	0.0227082	0.0229056	0.023742	0.0248406	0.0207332	0.0205413	0.0286799	0.0272703	0.0273044	0.0295277	0.0370797	0.0346606	0.0246645	0.0265129	0.0238552	0.0233406	0.0264235	0.0249899	0.0204955	0.0201438
0.0179182	0.0145967	0.0168976	0.0174183	0.0220777	0.0236856	0.0211269	0.0217393	0.0217333	0.0235998	0.0186603	0.0214804	0.0178998	0.0173427	0.0184726	0.019241	0.0203105	0.021739	0.0185814	0.0162389	0.023575	0.0237461	0.0188729	0.0216494	0.0244547	0.0232565	0.0244849	0.0258538	0.0238739	0.0235379	0.0222444	0.022799	0.0210823	0.0229132	0.0178218	0.0177671	0.0197103	0.0195717	0.0226242	0.026416	0.0319287	0.0308526	0.0202426	0.0207838	0.0193834	0.0199505	0.0244326	0.0211243	0.015877	0.0173657
0.017388	0.0169806	0.0184884	0.0191667	0.025657	0.0254736	0.0203337	0.0223422	0.0248249	0.0252151	0.0216623	0.0219936	0.0183292	0.0180792	0.0207402	0.0214671	0.0232058	0.0267948	0.0215883	0.0204902	0.0279763	0.0249334	0.019927	0.0214215	0.027882	0.0268039	0.0266219	0.0279958	0.0271477	0.0273856	0.0229236	0.0224157	0.0236322	0.025694	0.0199208	0.018636	0.0327983	0.0305622	0.0297354	0.0298272	0.0383432	0.0347588	0.023329	0.0241912	0.0219172	0.0224676	0.0253867	0.0233204	0.0179586	0.0184088
0.0127427	0.0110658	0.00898417	0.0096874	0.00919054	0.00837492	0.0115013	0.0103892	0.00785473	0.00664934	0.0140579	0.0140835	0.0156563	0.0133598	0.0129252	0.0110628	0.0166199	0.0168235	0.0126004	0.0135842	0.0181733	0.0175686	0.00945268	0.00996494	0.013702	0.0157209	0.0163746	0.0158788	0.0191069	0.0172997	0.0162012	0.0198453	0.0206239	0.0216752	0.0189897	0.0133576	0.0239009	0.0170537	0.0223179	0.0267398	0.0151712	0.0166497	0.0149376	0.0157138	0.0140949	0.0139409	0.0210072	0.0197901	0.0116274	0.0133878
0.0178859	0.0159547	0.0198684	0.0207401	0.0252327	0.026979	0.0215991	0.024528	0.0256689	0.0272697	0.020634	0.0210055	0.019386	0.0205879	0.0233672	0.0231585	0.0224312	0.0244123	0.0238145	0.0195888	0.0304156	0.0318141	0.0212943	0.0246383	0.0267266	0.02624	0.0258952	0.0268524	0.0255315	0.027055	0.0221773	0.0222747	0.0260416	0.0275255	0.0224002	0.0193832	0.030814	0.0268262	0.0331832	0.0315614	0.0397738	0.0347485	0.0237767	0.0249744	0.0213222	0.0204479	0.0240807	0.0223411	0.0169316	0.0182454
0.0118704	0.0108321	0.0079101	0.00866791	0.00810657	0.00731167	0.0111449	0.00966524	0.00736617	0.0063749	0.0120363	0.0126322	0.0130856	0.0116745	0.00990579	0.00872227	0.012953	0.013611	0.0111785	0.0116985	0.0139362	0.0141138	0.00852289	0.00844239	0.0121297	0.0132803	0.0122916	0.0138691	0.0146279	0.0156413	0.0153871	0.0179412	0.0202317	0.0189464	0.015923	0.00969065	0.0148625	0.0108862	0.0185658	0.0228682	0.0126861	0.0131906	0.0163529	0.0155337	0.0158605	0.0137438	0.0187747	0.0160822	0.0101197	0.0123799
0.0158185	0.0154682	0.0196735	0.0191422	0.0240719	0.0233621	0.0219695	0.0220316	0.0223413	0.0243045	0.018274	0.0181059	0.0168837	0.0185965	0.0203399	0.020568	0.0181272	0.0210888	0.0201094	0.0185073	0.0245687	0.0188422	0.0201383	0.0223989	0.023155	0.0216601	0.0236365	0.0242165	0.0224428	0.0231797	0.0202105	0.0192839	0.0232444	0.0227888	0.0191448	0.0177328	0.0239896	0.0177951	0.0248883	0.0231467	0.0324561	0.0272446	0.0200364	0.0203305	0.019703	0.0188752	0.0222765	0.0200766	0.0169411	0.0171963
0.010578	0.00912507	0.00764093	0.00721315	0.00800498	0.00732033	0.0114034	0.00881604	0.00812375	0.00643462	0.0135484	0.0131853	0.0147953	0.012538	0.0128928	0.0113124	0.0151355	0.015	0.0104657	0.0119051	0.0166521	0.0166161	0.00789064	0.00896081	0.0121169	0.0135631	0.0138114	0.0149333	0.0151248	0.0161531	0.0139922	0.0182384	0.0179998	0.0212351	0.0165525	0.012906	0.0181561	0.015033	0.0186597	0.0228947	0.0123621	0.0133577	0.0141065	0.0156091	0.0122444	0.0119729	0.0183721	0.0163384	0.0106091	0.012264
0.0176379	0.0185229	0.0151991	0.0160427	0.0208792	0.0216903	0.0183018	0.0228348	0.0189149	0.0208103	0.0161318	0.0173054	0.0146386	0.0159804	0.0171279	0.0168076	0.0142223	0.0158802	0.015749	0.0155281	0.0200885	0.0206021	0.0142523	0.0173895	0.0196073	0.0190697	0.0197993	0.0207572	0.0198095	0.0205693	0.0198995	0.0190992	0.0218093	0.0233239	0.0216098	0.0185794	0.0206587	0.0201008	0.021052	0.0271312	0.0322856	0.0317752	0.0145441	0.0159674	0.0150344	0.0163886	0.0171224	0.0162757	0.0156447	0.0165849
0.0114029	0.0107154	0.0106442	0.00973615	0.0106116	0.00913928	0.0140466	0.010866	0.00981522	0.00799308	0.0152251	0.0155902	0.0163427	0.0148907	0.0144097	0.012078	0.0168608	0.0174596	0.0125451	0.0143422	0.0194175	0.0187644	0.0113578	0.0107157	0.0152304	0.016087	0.0157364	0.0165721	0.0192499	0.019675	0.0188338	0.0236542	0.0192719	0.0224738	0.0188458	0.0127536	0.0250535	0.0211663	0.0243546	0.0275739	0.0178641	0.0177376	0.0171572	0.0169392	0.0157572	0.0160177	0.0208478	0.0203083	0.0131216	0.0150041
0.016198	0.013211	0.0183583	0.0164876	0.0246019	0.0214084	0.0194505	0.0188504	0.0229547	0.0224602	0.0200316	0.019249	0.0187864	0.017165	0.01886	0.0181148	0.0205091	0.019402	0.0197474	0.0167223	0.0232543	0.0168139	0.0199764	0.0225635	0.0257246	0.0228021	0.0254489	0.023317	0.0222879	0.0202982	0.0228343	0.0189404	0.0197313	0.0184226	0.0175243	0.015851	0.0209323	0.0165727	0.0209914	0.0225916	0.0296411	0.0255147	0.0218009	0.0233887	0.0205673	0.0196152	0.0228256	0.0203639	0.0164766	0.0165864
0.0108113	0.00909672	0.00813681	0.00768079	0.00825738	0.00721515	0.0107012	0.00842491	0.00714023	0.00610666	0.0110419	0.0114013	0.0126617	0.0102027	0.0104999	0.00885407	0.0132649	0.0132894	0.010507	0.0116913	0.0151915	0.0145526	0.00862066	0.0090091	0.0120241	0.0136311	0.0135117	0.0141551	0.0142417	0.0129328	0.0145051	0.0180939	0.017548	0.0189066	0.0157704	0.0103309	0.0181325	0.015583	0.0180228	0.0218527	0.0138279	0.0144558	0.0120585	0.012209	0.0125404	0.0120002	0.0165777	0.014708	0.00967981	0.0111576
0.0112076	0.00941509	0.00937204	0.00927308	0.00973645	0.00884688	0.0119251	0.00973633	0.00938498	0.00757287	0.0133244	0.0136995	0.0147194	0.0131123	0.0144178	0.012323	0.0158976	0.0156	0.0127334	0.0132556	0.0175028	0.0172707	0.010525	0.0112772	0.0141519	0.0156039	0.0150914	0.0169293	0.0182075	0.0174585	0.0179156	0.0204615	0.0212832	0.0210023	0.0184184	0.0113666	0.0236101	0.0194143	0.0211122	0.0233857	0.0164459	0.0165112	0.0166549	0.016741	0.0163348	0.0151555	0.0197878	0.0176228	0.0117491	0.0133304
0.0181093	0.0164675	0.0176905	0.018692	0.0227677	0.0235458	0.0194312	0.0207882	0.0223016	0.023883	0.0188621	0.0183172	0.0189005	0.0187149	0.0203792	0.0202686	0.0202295	0.0225429	0.0208625	0.0183427	0.02562	0.025968	0.0194252	0.0208882	0.0246581	0.0255906	0.0245132	0.0268765	0.0251085	0.024815	0.0216914	0.0214172	0.0219041	0.0222923	0.019324	0.0186921	0.0248676	0.0231409	0.0275615	0.0280882	0.0382019	0.033431	0.0217112	0.0229174	0.0199172	0.0208487	0.0248921	0.0215333	0.0190737	0.0181547
0.00998713	0.00889562	0.00824675	0.00781386	0.00855692	0.00723043	0.00973435	0.00766865	0.00762654	0.00672372	0.011695	0.0121073	0.0133492	0.0113505	0.0118664	0.0104003	0.0151571	0.0149743	0.0104752	0.0128883	0.0161181	0.0152911	0.00895278	0.00999648	0.0127411	0.0139093	0.0142086	0.014754	0.0170333	0.0171056	0.0144255	0.0181743	0.0167406	0.021394	0.0165377	0.0109736	0.0202095	0.0178183	0.0205458	0.023556	0.0152436	0.0165435	0.0163827	0.0178574	0.0145654	0.0144956	0.020873	0.0190731	0.0106673	0.0118702
0.016076	0.0147146	0.0143525	0.0151622	0.0217825	0.02078	0.0179881	0.0175136	0.0214885	0.0202767	0.0163375	0.0155932	0.0162663	0.0158276	0.0171897	0.0173175	0.0177389	0.0189553	0.016817	0.0149196	0.0230273	0.022857	0.0152808	0.0180972	0.0212542	0.021339	0.0203435	0.0209389	0.0204998	0.0206704	0.0187371	0.0179864	0.0195073	0.0205054	0.0189935	0.0165559	0.0218302	0.0205036	0.0247703	0.0263383	0.0338087	0.0292877	0.0202307	0.021737	0.0169887	0.0182171	0.0228972	0.0209782	0.0152257	0.0153395
0.0110725	0.00932703	0.0084631	0.00805395	0.00981931	0.00800437	0.0104815	0.00813151	0.00840842	0.00639404	0.0135699	0.0132577	0.0144489	0.0118655	0.0131562	0.0105362	0.0142995	0.014867	0.0114044	0.0135068	0.0180135	0.0171732	0.00879842	0.00930554	0.0132887	0.0149668	0.0145408	0.0150591	0.0161162	0.0150679	0.0168499	0.0193361	0.0199572	0.0213617	0.0177287	0.0128019	0.0214039	0.0170612	0.0218497	0.024823	0.0160762	0.0171957	0.0148702	0.0142673	0.0132729	0.0132422	0.0200444	0.0180112	0.0098294	0.0119152
0.0106373	0.00828583	0.00847579	0.00800646	0.00787105	0.00722363	0.010043	0.00840057	0.00732905	0.00603498	0.0118989	0.0106226	0.012863	0.0103871	0.0114714	0.00961626	0.0151242	0.0145814	0.0117626	0.0127756	0.0165158	0.0162417	0.00863374	0.00950968	0.0128488	0.014616	0.0139264	0.0152953	0.0170429	0.0155073	0.0168528	0.0183278	0.0193523	0.01913	0.0172478	0.0110085	0.0243376	0.019259	0.0224672	0.0259459	0.0161583	0.0165851	0.0146679	0.0146157	0.0142829	0.0142552	0.0181085	0.0162128	0.0115624	0.0128861
0.0124594	0.0119029	0.00920254	0.00876462	0.00970739	0.00859228	0.0115785	0.00992727	0.00900527	0.00758603	0.0134151	0.013533	0.0157317	0.0127813	0.0128361	0.0102396	0.0161374	0.0167837	0.0117514	0.0131129	0.0185872	0.0189119	0.00932557	0.0097196	0.0144004	0.0146821	0.0149573	0.0168475	0.0179698	0.016796	0.0169331	0.0208669	0.021672	0.0223023	0.0168148	0.0123495	0.0242066	0.0203004	0.0232428	0.0281998	0.0179592	0.0184736	0.017373	0.0178428	0.0140591	0.015948	0.02141	0.0192939	0.0122684	0.0133516
0.0192039	0.017813	0.021328	0.0211899	0.0277754	0.0274317	0.0244024	0.0268975	0.0248455	0.0281476	0.020971	0.0226112	0.0207513	0.0219491	0.0222198	0.0234284	0.0248729	0.0262935	0.0231561	0.0205163	0.0302684	0.0273989	0.0213264	0.0221097	0.0246315	0.0261815	0.0291317	0.03022	0.0281095	0.0303597	0.0257887	0.0264898	0.0268598	0.0285643	0.0220162	0.0187812	0.0314088	0.0306933	0.0309346	0.0312192	0.0417728	0.0385516	0.0229367	0.0240128	0.0202717	0.0221595	0.0252199	0.0232021	0.0187643	0.0204745
0.0107653	0.00900704	0.00837713	0.00795592	0.00819078	0.00766282	0.0120457	0.00937404	0.00796494	0.00652486	0.0121953	0.0119288	0.0147043	0.0115279	0.0115754	0.00958371	0.0137693	0.0134497	0.0107095	0.0113904	0.0153297	0.0152993	0.00860886	0.00930396	0.0131806	0.0144224	0.0133174	0.014669	0.0158802	0.0137008	0.0158965	0.0203992	0.0176237	0.0199918	0.014908	0.0103737	0.0197181	0.0131923	0.0157887	0.0186735	0.0126199	0.0129092	0.0179482	0.0161402	0.015377	0.0142745	0.0194984	0.0177941	0.0120546	0.0122029
0.00985482	0.00857791	0.00761283	0.00711674	0.00790257	0.00669645	0.00913764	0.00781188	0.00741011	0.00623012	0.0107085	0.0119059	0.0125669	0.010219	0.0109382	0.00956869	0.0128147	0.0126033	0.00981132	0.0117525	0.014733	0.014588	0.0081264	0.00861363	0.0114106	0.0130853	0.0121244	0.013775	0.0152654	0.0148302	0.0120463	0.0177513	0.0145522	0.0174303	0.0137998	0.0095343	0.0213583	0.0174473	0.0178622	0.0217465	0.0140312	0.0145982	0.0149977	0.0154483	0.0124118	0.0128678	0.0187165	0.0175011	0.0107432	0.0115133
0.0167941	0.0149623	0.0177542	0.0157968	0.0242457	0.0223996	0.0201022	0.0204933	0.0225695	0.0236757	0.0179036	0.0172028	0.018487	0.0190973	0.0194886	0.0200225	0.0175452	0.0205739	0.0181724	0.0151723	0.0233013	0.022476	0.0171538	0.0169324	0.0216801	0.0214744	0.0257173	0.0256577	0.0223349	0.0238515	0.0226126	0.0213005	0.0237766	0.0238921	0.0198345	0.0163876	0.0248521	0.022465	0.0244275	0.0260419	0.033696	0.0314755	0.0175153	0.0203956	0.0172631	0.0182569	0.0235046	0.0198581	0.0145461	0.0142597
0.0148554	0.0146408	0.0176083	0.0178046	0.0222165	0.024259	0.0184476	0.0200565	0.0213455	0.0232075	0.0176009	0.0196121	0.015692	0.0166191	0.0198312	0.019061	0.0174912	0.0205677	0.0176361	0.0137183	0.0281346	0.0267319	0.0174122	0.0188429	0.0245213	0.0241481	0.0244705	0.0276277	0.0231908	0.0249544	0.0213295	0.0223762	0.0185489	0.018904	0.0179797	0.0148408	0.0251765	0.0221835	0.0267753	0.028407	0.0390775	0.0351667	0.0187342	0.0181345	0.0168211	0.0187441	0.0211599	0.0186808	0.013198	0.0166768
0.0163865	0.0169061	0.0168401	0.0162007	0.0207221	0.0207396	0.0199844	0.0200648	0.0217004	0.0210691	0.0166251	0.0180015	0.0183396	0.0173822	0.0175231	0.0182553	0.0202625	0.0234921	0.0183013	0.0147208	0.0251761	0.0226788	0.016575	0.0174371	0.0223294	0.0213844	0.0231034	0.0244223	0.022469	0.0236678	0.0218843	0.021557	0.02169	0.0229088	0.0191128	0.0185291	0.0229667	0.0199518	0.0233883	0.0251642	0.0311356	0.0287994	0.0208525	0.0205984	0.0171292	0.0162969	0.0228078	0.018922	0.0165939	0.0155205
0.00952869	0.00768557	0.00651573	0.0066401	0.00781237	0.00721608	0.00903445	0.00744227	0.00710974	0.00624885	0.0109519	0.0110941	0.0120256	0.0105692	0.0107196	0.00941146	0.0128117	0.0139469	0.00925715	0.00966361	0.0155808	0.0152843	0.00707855	0.00791548	0.0113561	0.012727	0.0124825	0.0148718	0.014886	0.0141568	0.0130746	0.0160131	0.0146728	0.017152	0.0134647	0.00982472	0.020003	0.0177129	0.0159663	0.0211695	0.0121165	0.0142721	0.0136205	0.0147194	0.0121907	0.0125002	0.016219	0.0168747	0.00974776	0.0105007
0.0160022	0.0152382	0.0204676	0.0203934	0.0269107	0.0236656	0.0232519	0.022772	0.0263866	0.0266726	0.0215305	0.0220547	0.0219523	0.0190805	0.0231313	0.0242279	0.0249108	0.0248726	0.0190883	0.0198429	0.0313981	0.0298616	0.0229099	0.0254917	0.0292375	0.0280961	0.0280002	0.0285308	0.0302668	0.0289429	0.0254553	0.0241192	0.0215556	0.0233142	0.0204532	0.0185771	0.0329038	0.0318352	0.0292985	0.0288738	0.0414369	0.0373117	0.023964	0.0227037	0.0234816	0.0234645	0.0239418	0.0215658	0.0166611	0.0180788
0.020652	0.019997	0.021159	0.02183	0.028435	0.0291194	0.0240914	0.0245489	0.0271436	0.0277476	0.0212809	0.0200816	0.0195651	0.0195421	0.022296	0.0229299	0.0198595	0.0247902	0.020379	0.0162554	0.0315731	0.0297194	0.0194289	0.0199155	0.0280849	0.0275684	0.0276519	0.0277667	0.0234748	0.0224421	0.0298379	0.0273959	0.0296184	0.0274228	0.0340628	0.032382	0.0261837	0.0222586	0.0269732	0.0287492	0.0373052	0.0343517	0.0263108	0.0248958	0.0236745	0.0230875	0.0309265	0.0242266	0.0223966	0.0230394
0.0156649	0.0142098	0.020667	0.0182747	0.0260705	0.028159	0.0231733	0.0235115	0.0270373	0.0283258	0.0236025	0.0238971	0.0236607	0.0212019	0.0239255	0.0243403	0.0303877	0.0306187	0.024326	0.0219749	0.0289004	0.0277102	0.021524	0.0263463	0.0293496	0.0290573	0.0302187	0.0301616	0.031699	0.030632	0.0257253	0.0248316	0.0266679	0.0287434	0.0235723	0.0211638	0.0358146	0.0330922	0.0327843	0.0343694	0.0382049	0.0343426	0.0317238	0.0309125	0.0260613	0.0256746	0.02857	0.0278097	0.0216878	0.0188071
0.00910425	0.00674936	0.0070893	0.00656241	0.00744252	0.00659957	0.00860568	0.00744401	0.00654181	0.00561469	0.011436	0.0108416	0.0125157	0.0102282	0.0103022	0.00908172	0.0120451	0.0113154	0.00989066	0.0105577	0.0135823	0.013643	0.00793499	0.00809443	0.010701	0.0116662	0.0118271	0.0126293	0.0146176	0.0136503	0.0126932	0.0159647	0.0165562	0.0168592	0.0134926	0.00969005	0.0167306	0.0115558	0.0139959	0.0177793	0.0117985	0.0124158	0.0134903	0.0136415	0.0125143	0.0120406	0.0156163	0.0143477	0.00889123	0.0100523
0.0153075	0.0127471	0.0105301	0.0105943	0.0104555	0.0101072	0.0130813	0.0101764	0.00985716	0.00882336	0.0155172	0.0154932	0.0179784	0.014124	0.0148865	0.013015	0.0183121	0.0190553	0.0147467	0.014106	0.020362	0.0206233	0.0103614	0.0108956	0.0147314	0.0159086	0.0151688	0.0176996	0.0168447	0.0175925	0.0167023	0.0238242	0.024177	0.0256089	0.0222558	0.016565	0.0218559	0.0186307	0.0231285	0.0293251	0.0144785	0.019273	0.0206613	0.0213039	0.0181543	0.0176254	0.0239522	0.021096	0.014503	0.0148331
0.010637	0.00875974	0.00896325	0.00844098	0.00892436	0.00821262	0.0109265	0.00938849	0.00912684	0.00771599	0.0134983	0.0129452	0.0158487	0.0121517	0.0128514	0.0111509	0.0153514	0.0160346	0.0118248	0.013922	0.0174779	0.017282	0.00994875	0.010316	0.0146203	0.0170453	0.0154901	0.0154944	0.0176739	0.017028	0.0170094	0.0220741	0.0181578	0.0216822	0.0169742	0.0127964	0.0224009	0.0189482	0.019461	0.0243245	0.0142877	0.0168763	0.0169318	0.0165149	0.0137125	0.0149338	0.0198866	0.0194775	0.0113796	0.0133715
0.0181436	0.0174676	0.0185826	0.017693	0.02463	0.0243681	0.0207458	0.0215488	0.0243422	0.0244041	0.0209262	0.0214117	0.0201922	0.0190097	0.0199441	0.0214239	0.0254846	0.0256021	0.0214202	0.0198159	0.0289917	0.0269627	0.019726	0.0221411	0.0262222	0.0252402	0.0264641	0.0264455	0.0276431	0.0264799	0.0241751	0.0234726	0.0247749	0.0246954	0.017801	0.0168222	0.0290801	0.0268925	0.0290004	0.0297698	0.0322588	0.0301227	0.0225071	0.0210828	0.0217434	0.0197431	0.0256372	0.0226839	0.0151416	0.0169966
0.0149176	0.0140595	0.0143471	0.0135184	0.017696	0.0183222	0.01701	0.0181651	0.0188148	0.0200398	0.0143181	0.0150612	0.0145462	0.0146041	0.0172691	0.0169898	0.0140867	0.0176272	0.0150523	0.0132565	0.024087	0.0212845	0.013617	0.015073	0.0200319	0.0203691	0.0202364	0.0208113	0.0181515	0.0203219	0.0204134	0.019272	0.0215994	0.0220632	0.0212209	0.0208346	0.0205491	0.0143746	0.0242199	0.0233156	0.0309819	0.0235637	0.0201967	0.0225624	0.0192094	0.0181491	0.0213847	0.0191516	0.0150918	0.01571
0.00949737	0.00810115	0.00782165	0.0077875	0.00851989	0.00710112	0.00988322	0.00720011	0.00797617	0.00629983	0.0114758	0.00964512	0.0128665	0.0101243	0.010196	0.0085145	0.0124724	0.0136607	0.00980368	0.0118508	0.0144788	0.0149105	0.00853605	0.00907322	0.0124464	0.0133401	0.0136401	0.0134068	0.014503	0.012822	0.0131207	0.0177764	0.0156584	0.0187155	0.0142028	0.01082	0.0179208	0.0150059	0.0168447	0.0207993	0.0125923	0.0145561	0.0138458	0.0152028	0.012409	0.0145153	0.0190183	0.0187711	0.0105901	0.0115624
0.013734	0.0129867	0.0164699	0.0159177	0.0232202	0.0240387	0.0181676	0.0172581	0.0215592	0.0205675	0.0159465	0.0167833	0.0153583	0.0155375	0.0186304	0.0191613	0.0165763	0.0203432	0.016727	0.0134635	0.0242558	0.0213599	0.0174231	0.0187669	0.0233297	0.0246545	0.0223958	0.023227	0.0201959	0.0219367	0.0227525	0.0222296	0.0219339	0.021787	0.0193693	0.0185364	0.0227822	0.0189971	0.0242883	0.0243187	0.0331377	0.0286309	0.020014	0.0201373	0.0175229	0.0173996	0.0208744	0.017929	0.0149349	0.0146364
0.0214558	0.0182384	0.0221024	0.0233751	0.0259192	0.0262287	0.0238716	0.0260517	0.0264272	0.0273032	0.0197098	0.0216182	0.0210059	0.022341	0.0255983	0.0250346	0.0218386	0.0248164	0.024687	0.0204583	0.0309108	0.0301176	0.0228214	0.0249352	0.02613	0.0269888	0.0295319	0.029437	0.0257533	0.0279139	0.0266446	0.0283026	0.0252146	0.0264962	0.02292	0.0189335	0.0272475	0.0272727	0.0273175	0.0316926	0.0350608	0.0354981	0.0224069	0.0203781	0.0189024	0.0193826	0.0266476	0.0223608	0.0171762	0.0171196
0.0170134	0.0160779	0.0189732	0.0188288	0.0251432	0.0250173	0.0206023	0.0222478	0.0236684	0.0242116	0.0176855	0.020246	0.0185033	0.019344	0.021517	0.021672	0.0216338	0.0237908	0.0195307	0.0171372	0.02687	0.0241986	0.0177432	0.0216041	0.0259379	0.0260824	0.0252486	0.027593	0.024517	0.0254509	0.0221416	0.0218126	0.0200113	0.0229746	0.0149691	0.0119618	0.0266885	0.025045	0.0243234	0.0264414	0.0351918	0.0314752	0.0204997	0.0222048	0.0186606	0.0202855	0.0208594	0.0175877	0.015463	0.0165154
0.0136078	0.0135884	0.0159617	0.014851	0.0213307	0.0215328	0.0181497	0.018273	0.0186089	0.0211001	0.0175946	0.0173269	0.015583	0.0160948	0.0164915	0.018159	0.0167319	0.0189833	0.0161162	0.0132676	0.0225561	0.0204579	0.0154765	0.0158921	0.0200622	0.0201358	0.0215447	0.0220571	0.0203874	0.0221373	0.0191137	0.0181274	0.0212618	0.0212344	0.0167182	0.0153409	0.0182679	0.0153105	0.0229541	0.0253736	0.0299138	0.0279532	0.0186514	0.0163887	0.0155696	0.0144859	0.0210926	0.0180553	0.013711	0.0112932
0.0122605	0.0106002	0.00923243	0.00941908	0.00927387	0.00803076	0.0116366	0.0104803	0.00883183	0.00692797	0.0138494	0.0135661	0.015637	0.0117841	0.0130358	0.0104669	0.0150503	0.0147772	0.0130076	0.0138662	0.0162901	0.0158303	0.0100046	0.0100046	0.0132683	0.0144897	0.01401	0.0152931	0.0167842	0.015439	0.0152948	0.0191483	0.0185027	0.0187122	0.015561	0.0102379	0.0226314	0.018938	0.0206421	0.0228167	0.0158688	0.0155581	0.0156169	0.0152838	0.0159557	0.0144654	0.0191829	0.0175049	0.0114326	0.0124501
0.0189496	0.019399	0.0201407	0.0193155	0.0246847	0.0240567	0.0217949	0.0238388	0.0273614	0.0264653	0.0191013	0.0188489	0.0165884	0.0185409	0.0202884	0.0237058	0.0158447	0.0237808	0.022218	0.0225166	0.0277766	0.0262853	0.0185718	0.0205708	0.0261757	0.024465	0.0249238	0.0256082	0.0203553	0.0243032	0.0279228	0.0274836	0.027551	0.0291992	0.0267566	0.0247014	0.0256302	0.023318	0.028258	0.0307046	0.0388096	0.0343919	0.0249277	0.0270585	0.0249839	0.0245081	0.0255446	0.0237823	0.0222583	0.0232508
0.0186655	0.0165297	0.0186869	0.018608	0.0247009	0.0235015	0.0201568	0.021352	0.0231631	0.0244462	0.0172005	0.018723	0.0170637	0.0176397	0.0180489	0.0191244	0.0173604	0.0201351	0.0196508	0.0165018	0.0262705	0.0227979	0.0194088	0.0208878	0.0242596	0.0242964	0.0228955	0.0242026	0.0229266	0.0223589	0.0227686	0.0229735	0.0233061	0.0246044	0.0210235	0.0191598	0.024059	0.0209102	0.0255581	0.0272326	0.0286478	0.0258273	0.0226291	0.0238881	0.0218413	0.0210811	0.0258968	0.0223606	0.0172055	0.0174678
0.0128108	0.0108187	0.00931341	0.00971997	0.0103468	0.00924806	0.0131973	0.0110979	0.00947309	0.0076168	0.0147287	0.0147481	0.0171646	0.0134219	0.0149252	0.0119972	0.0166685	0.0154322	0.0133095	0.0139553	0.0172749	0.0166913	0.0113767	0.0112641	0.0146295	0.0165859	0.016548	0.0168301	0.018802	0.0181855	0.0195723	0.0217102	0.0195789	0.021521	0.0179739	0.0112006	0.023841	0.0185105	0.023226	0.0252286	0.0179658	0.0180115	0.0195885	0.0184861	0.0176284	0.0169355	0.0221152	0.0200991	0.0128111	0.0148856
0.0134341	0.00927859	0.00897116	0.00872336	0.00914407	0.00801763	0.0121421	0.0102328	0.00796808	0.00616395	0.0120276	0.0125754	0.0139975	0.0114698	0.0120962	0.00932993	0.0150789	0.014478	0.0118506	0.0111296	0.0190502	0.0183408	0.00964807	0.00956139	0.0124318	0.0146163	0.0140412	0.0149167	0.0149472	0.0145216	0.0165127	0.0209547	0.0230504	0.0225024	0.0213449	0.013701	0.0239015	0.0175141	0.0231107	0.0278917	0.0146696	0.0174143	0.0170749	0.0156308	0.0152546	0.0154123	0.0198981	0.0168374	0.012023	0.0124301
0.0144108	0.0131254	0.0166518	0.0160421	0.0240893	0.0244284	0.0203839	0.0206976	0.0234035	0.0234457	0.0175077	0.0189508	0.0178153	0.0174678	0.0198689	0.0211647	0.0200547	0.0210059	0.0176761	0.0155461	0.0289063	0.0270172	0.0174152	0.0204949	0.024266	0.0259819	0.0247652	0.0264567	0.0259139	0.0257413	0.0202404	0.0206817	0.0217269	0.0234438	0.0199072	0.0164661	0.0304351	0.0281034	0.029581	0.0286417	0.0396546	0.0350265	0.0211664	0.0198719	0.0186617	0.0193359	0.0234494	0.0206718	0.0164762	0.0166788
0.0131006	0.0114101	0.0115539	0.0123904	0.011681	0.0109036	0.0155554	0.0126834	0.0107782	0.00846028	0.0151859	0.0159474	0.0190135	0.0155367	0.0159052	0.0139461	0.0184406	0.0187063	0.0158998	0.0166857	0.0203487	0.0193036	0.012645	0.0122189	0.0162431	0.017868	0.0184165	0.0171154	0.0236134	0.0223271	0.0241194	0.0240832	0.0232679	0.0225977	0.0198362	0.0131718	0.026594	0.0215401	0.0222944	0.0246307	0.0180934	0.0186525	0.017465	0.017528	0.0173766	0.0159418	0.0208124	0.0192824	0.0145671	0.0169976
0.0103712	0.00865538	0.00844337	0.00808636	0.00854792	0.00770279	0.010489	0.00726523	0.00736978	0.00599854	0.0122474	0.0117744	0.0141313	0.0105172	0.0116195	0.00931843	0.01505	0.0151411	0.0107231	0.0122123	0.0158623	0.0161276	0.0086935	0.00940487	0.0132502	0.0147733	0.0133594	0.0145562	0.0178362	0.0160678	0.014812	0.0196467	0.015629	0.0200354	0.0141739	0.0112233	0.0204492	0.0150215	0.0174406	0.0201563	0.0146983	0.0146742	0.0139729	0.0143609	0.0112937	0.011533	0.0165471	0.0156714	0.00939635	0.010535
0.00914	0.00652171	0.00682859	0.00619872	0.006635	0.00616047	0.00788613	0.00606651	0.00595344	0.00511553	0.00992967	0.00902546	0.0111353	0.00881921	0.00901914	0.00805838	0.0126016	0.0133135	0.00818525	0.0100275	0.0135321	0.013298	0.0070953	0.00823009	0.010839	0.0125927	0.0119741	0.0127105	0.0139171	0.0111588	0.0107405	0.0165919	0.0141792	0.0168507	0.01237	0.00979731	0.0197942	0.0147048	0.0157581	0.020281	0.0104703	0.0121546	0.010408	0.0104791	0.00865764	0.00862512	0.0143643	0.0128187	0.00770893	0.00735614
0.0118272	0.0095986	0.00926787	0.00912416	0.00924012	0.00830353	0.0105551	0.00942488	0.00917186	0.00748442	0.0139602	0.0133262	0.0155957	0.0126902	0.0127524	0.0102371	0.0163038	0.0168604	0.01126	0.013078	0.0170643	0.0170169	0.00922879	0.0102244	0.013524	0.0158415	0.0144295	0.0163404	0.0185652	0.0165854	0.015486	0.021249	0.017863	0.0208084	0.0161372	0.0110651	0.0228978	0.0192948	0.0206577	0.025226	0.0159146	0.0164333	0.0191405	0.0195086	0.0183838	0.0168734	0.0220474	0.0196113	0.014079	0.0142966
0.0121277	0.0102263	0.00992577	0.00843607	0.0092832	0.00829314	0.0105195	0.00897699	0.0085754	0.00666683	0.0130186	0.0127848	0.0150384	0.0120066	0.0123669	0.0106466	0.0174347	0.017011	0.0130402	0.0143634	0.0185173	0.0188966	0.0102658	0.0112332	0.0147707	0.015735	0.014683	0.0157498	0.0182367	0.0165363	0.0159983	0.023672	0.0182211	0.0222359	0.0170557	0.0133263	0.0233727	0.0198903	0.0215785	0.0253393	0.0140176	0.0177728	0.0164811	0.0170067	0.014198	0.0143996	0.0194882	0.0187699	0.0110054	0.0135243
0.0183632	0.0190142	0.0193479	0.020554	0.0259361	0.0255087	0.0208002	0.0230709	0.0216732	0.0239139	0.0186339	0.0198376	0.0176127	0.0196285	0.020692	0.0222711	0.021523	0.0248503	0.0229717	0.0212977	0.0299732	0.0290148	0.0197717	0.0218267	0.0255262	0.0268612	0.0268567	0.0284307	0.0241557	0.0275269	0.0245709	0.023369	0.0249761	0.0269807	0.0197563	0.0190613	0.0319842	0.0313449	0.0342881	0.0342805	0.0416035	0.0388358	0.0277132	0.0281722	0.0219122	0.0241775	0.0298623	0.0270949	0.0173751	0.019279
0.0136257	0.0122501	0.011505	0.0117394	0.0110502	0.0107354	0.0153525	0.0120503	0.0110309	0.00912611	0.0166382	0.0171039	0.0194402	0.0164957	0.0156681	0.0131205	0.0186178	0.0174774	0.0165056	0.01676	0.0198437	0.0193464	0.0134917	0.0130274	0.0157912	0.0174285	0.01667	0.017456	0.0209051	0.0205177	0.0203065	0.0239429	0.0224412	0.02324	0.0196793	0.012354	0.0277285	0.0220694	0.0253193	0.0267975	0.0188184	0.0182325	0.0206968	0.0196198	0.0197677	0.0189478	0.0237036	0.0209673	0.0132092	0.0157437
0.0172735	0.0166888	0.0189259	0.0180275	0.0248705	0.0251223	0.0207394	0.0205765	0.0258592	0.0273794	0.0200683	0.0192208	0.019855	0.019212	0.0237937	0.0231851	0.0231523	0.0227642	0.0204347	0.0202566	0.0289953	0.0268814	0.021391	0.0245386	0.0253822	0.0267651	0.0265669	0.0265419	0.0271779	0.0261956	0.0224085	0.0218662	0.0202723	0.0226088	0.0192441	0.018548	0.029863	0.0272898	0.0263221	0.025938	0.0342456	0.0302339	0.0232383	0.0226218	0.0197351	0.0205692	0.0244596	0.0202842	0.0181593	0.0172983
0.019883	0.0177382	0.0211122	0.0202876	0.0241738	0.0253724	0.0235961	0.0233836	0.0265208	0.0253087	0.0229909	0.0228204	0.022171	0.0202199	0.0241352	0.0233049	0.0248962	0.025278	0.0235278	0.0221369	0.0278329	0.0251264	0.0218488	0.0245174	0.0275358	0.0282048	0.0277602	0.0289409	0.029267	0.0281355	0.0212164	0.0209512	0.0209361	0.0239141	0.0185412	0.0178356	0.0319462	0.0307358	0.027498	0.0280609	0.0374067	0.0341353	0.026492	0.0260524	0.0255484	0.0258972	0.0256049	0.0244188	0.0224853	0.0213876
0.0115046	0.00983175	0.00992823	0.0091815	0.00981564	0.008625	0.0119617	0.00938825	0.00901439	0.00762847	0.0139077	0.0137589	0.0157247	0.0120798	0.0140758	0.0110945	0.015954	0.0150991	0.0129171	0.0166734	0.0177498	0.0176894	0.0113591	0.0107655	0.0142542	0.0165108	0.0149488	0.0161348	0.0177758	0.016348	0.0174316	0.0220603	0.0181985	0.0221051	0.0173534	0.0117919	0.0222991	0.0184537	0.0228077	0.0260499	0.0151865	0.0170538	0.0178401	0.0185506	0.0171565	0.0153301	0.0210476	0.0182448	0.0122917	0.0131126
0.0186114	0.0164227	0.0193179	0.0181123	0.0246828	0.025357	0.0227558	0.023495	0.0253635	0.0271327	0.0225143	0.0248685	0.021255	0.0219826	0.0234573	0.0245876	0.0245118	0.0252836	0.0209479	0.0197346	0.0271355	0.0274034	0.020076	0.0229765	0.0268469	0.0278982	0.024836	0.0266698	0.0297071	0.0298805	0.0227744	0.021786	0.023533	0.0237515	0.0199091	0.018841	0.0328177	0.0305569	0.0275648	0.0292012	0.0381142	0.0357133	0.0228527	0.0231035	0.0197834	0.0220265	0.0242356	0.0224588	0.0181337	0.0177735
0.0131212	0.0112813	0.0106941	0.010985	0.0113917	0.0101119	0.0140257	0.011315	0.0104198	0.00886492	0.0153356	0.0155742	0.0174522	0.0145868	0.0152765	0.0133239	0.0178417	0.0165427	0.0143046	0.0154485	0.0193564	0.0185038	0.0116785	0.0124157	0.0161459	0.0172298	0.0175777	0.0192332	0.021459	0.0213644	0.0209682	0.0250147	0.0212496	0.0213033	0.0169204	0.0123353	0.0272273	0.0222824	0.0248478	0.0279093	0.0198033	0.0205334	0.0191982	0.0187965	0.0183873	0.0170625	0.0219164	0.0202201	0.0134294	0.0153028
0.00880958	0.00852411	0.00777246	0.00703465	0.00812314	0.00665073	0.00970636	0.00726473	0.00692696	0.00558556	0.011015	0.0110459	0.0128293	0.0102945	0.0106274	0.00927544	0.0138572	0.0142172	0.00984538	0.0111545	0.0146112	0.0153524	0.00832625	0.00872312	0.0122109	0.0136488	0.0135193	0.014064	0.0155184	0.0146891	0.0138716	0.0183169	0.0148961	0.0181232	0.0156362	0.011422	0.0223736	0.0173785	0.0201574	0.0241854	0.0142797	0.0157845	0.0121162	0.0127665	0.0114905	0.0117635	0.0159968	0.015277	0.010414	0.0118998
0.014306	0.0137501	0.0147727	0.0130285	0.0209055	0.0208036	0.0169602	0.0175788	0.0234499	0.0223444	0.0181398	0.0179114	0.0160403	0.0149757	0.0200541	0.0186514	0.0162116	0.017833	0.0161075	0.0147682	0.0247034	0.02233	0.0154089	0.0172928	0.0243895	0.0225805	0.0243455	0.0247993	0.0218119	0.0212806	0.0201118	0.0178535	0.0193585	0.0168009	0.0186626	0.0145263	0.0260361	0.0208731	0.0222864	0.0240673	0.0332899	0.0296989	0.0192602	0.0172883	0.0147815	0.0157713	0.0227361	0.0182447	0.0140134	0.0132679
0.016927	0.0155193	0.0186938	0.0175429	0.0229544	0.0232919	0.0209089	0.0204995	0.0216356	0.0240361	0.0208279	0.0232557	0.0197499	0.0193337	0.019502	0.0202155	0.0206547	0.0253919	0.0191421	0.0167003	0.0271308	0.0235381	0.0198487	0.0217886	0.0236174	0.0235709	0.0234404	0.0255007	0.0270563	0.0279997	0.0202833	0.0204576	0.0224068	0.0224964	0.0169341	0.0163348	0.029416	0.029051	0.0268455	0.0294609	0.0396463	0.0372044	0.0215918	0.0216681	0.0197359	0.0195993	0.0239724	0.0196042	0.0184407	0.0184869
0.0112282	0.008707	0.00850623	0.00842234	0.00922073	0.00840523	0.0117617	0.00988754	0.00853434	0.00665394	0.0129969	0.0125175	0.0155225	0.0131361	0.0123838	0.0100951	0.0158437	0.0155868	0.01237	0.0132546	0.0180595	0.0173084	0.00906897	0.00983397	0.0136564	0.0159478	0.0154467	0.0159323	0.0186728	0.0166652	0.0182907	0.0222705	0.0225151	0.0223111	0.0184133	0.0112259	0.0259976	0.0195517	0.0220521	0.026443	0.0154557	0.0165413	0.0170524	0.0178177	0.0163992	0.0152231	0.020907	0.0193462	0.0116732	0.013798
0.0131721	0.010699	0.0104503	0.0105989	0.0100119	0.0088339	0.0141694	0.0110959	0.00953624	0.00774466	0.0147354	0.0144243	0.0178718	0.0132496	0.013838	0.0112006	0.0163204	0.0156223	0.0133762	0.0145281	0.0182984	0.018313	0.0105892	0.0106753	0.0146278	0.0163574	0.0156304	0.016553	0.0197745	0.0186844	0.0186709	0.0218356	0.0197538	0.0213686	0.0182194	0.0120319	0.0262213	0.0207651	0.0230257	0.0279343	0.0185376	0.0191328	0.0182102	0.018234	0.016429	0.0162514	0.0202222	0.0191877	0.013888	0.0144208
0.0209362	0.0197508	0.0217719	0.0216995	0.0291065	0.0275513	0.0257163	0.0272066	0.0276721	0.027512	0.0212635	0.0247223	0.021707	0.0239875	0.0224475	0.0244861	0.0236231	0.0298791	0.0233459	0.0211102	0.0307848	0.0278875	0.0225121	0.0260053	0.0295756	0.0299175	0.0291782	0.0291802	0.0269461	0.0296927	0.0254742	0.0261216	0.0268463	0.0284754	0.0230193	0.02277	0.0237589	0.0260853	0.0262468	0.0294302	0.0328197	0.0321305	0.0262295	0.0252748	0.0250712	0.0244611	0.024293	0.0227208	0.0193046	0.0185277
0.0120794	0.0105549	0.00862843	0.00852313	0.00890311	0.0076816	0.0108717	0.00879274	0.00800467	0.00660926	0.0124506	0.0121292	0.0141112	0.0120855	0.0118838	0.00982748	0.0165188	0.0159667	0.011342	0.013393	0.0172655	0.0178153	0.00913114	0.00946295	0.0137371	0.0149308	0.0142186	0.015669	0.0171981	0.0163899	0.0152182	0.0199861	0.0198089	0.022497	0.0167733	0.0129552	0.0195277	0.0153034	0.0191506	0.0247915	0.0154496	0.0164219	0.015139	0.0157966	0.0148049	0.0145479	0.0206624	0.0181925	0.0117323	0.0114747
0.0131681	0.0108972	0.00936865	0.00774213	0.00861326	0.00769771	0.0116591	0.00899597	0.0082208	0.00664632	0.013367	0.012949	0.0155938	0.0125161	0.0119762	0.00978823	0.0155165	0.0155136	0.0116281	0.0124544	0.0167567	0.0173193	0.00962644	0.00933725	0.0132242	0.0142407	0.0151392	0.0151055	0.0149257	0.0135899	0.012587	0.0190962	0.0197515	0.020831	0.0210446	0.0157648	0.0195304	0.0157084	0.020766	0.0246324	0.014623	0.0157229	0.0190386	0.0207631	0.0175285	0.0187549	0.0229868	0.0201161	0.0132757	0.0151556
0.00945751	0.00699028	0.00761978	0.00750611	0.00803798	0.00703534	0.00901506	0.00740015	0.0075089	0.00607482	0.0107793	0.0110562	0.0122427	0.0105861	0.0109206	0.00933562	0.0138329	0.0136917	0.0105199	0.0111511	0.0153833	0.014755	0.00858121	0.00843509	0.0122721	0.0132865	0.0125532	0.0139825	0.0159732	0.0148209	0.013897	0.0177577	0.0175241	0.0195164	0.0142696	0.011102	0.0220527	0.0168785	0.0188002	0.0221733	0.0144307	0.0151426	0.0148153	0.0149082	0.0150387	0.013802	0.018777	0.0176613	0.0105942	0.0112242
0.017903	0.0164858	0.0177854	0.0169514	0.0247752	0.0237173	0.019697	0.0213726	0.0237668	0.0222912	0.0186882	0.0179425	0.017775	0.0181745	0.0201765	0.0202416	0.0203149	0.0214952	0.0194318	0.0182642	0.0300237	0.0255941	0.0185127	0.0200144	0.0252971	0.0241221	0.0234521	0.0241364	0.0245311	0.0243466	0.0240452	0.0219599	0.0254646	0.0269617	0.0243022	0.0215793	0.0249373	0.0206962	0.0298767	0.030233	0.0393039	0.0348988	0.0236108	0.0262709	0.0235524	0.0231465	0.0272281	0.0245315	0.0214547	0.0193681
0.0177527	0.0151865	0.0170996	0.0184071	0.0220869	0.0234829	0.0191371	0.0203651	0.0212924	0.0226419	0.019035	0.0189062	0.0162212	0.0173192	0.0184939	0.0190531	0.0183624	0.0196871	0.0210781	0.018128	0.0242765	0.0232848	0.0200672	0.0222199	0.0226257	0.0236692	0.0227631	0.0234164	0.0212697	0.0229365	0.0232444	0.0226619	0.024668	0.0241135	0.0211595	0.0192917	0.0247918	0.0236194	0.0283965	0.0297196	0.035568	0.033339	0.0214093	0.0203659	0.0165054	0.0174245	0.0223929	0.0216294	0.0155512	0.0158561
0.0120439	0.00984791	0.00944102	0.0090559	0.0095448	0.00855992	0.0119235	0.00947182	0.00840842	0.00698289	0.0125704	0.0123394	0.013905	0.0116452	0.011971	0.0100785	0.016228	0.0169331	0.0140506	0.0134473	0.0178433	0.0179823	0.010223	0.00970281	0.0143825	0.0153645	0.0148827	0.016307	0.0181003	0.0180288	0.0179783	0.0219457	0.0248411	0.0250304	0.0245572	0.016142	0.021111	0.0175139	0.0244052	0.0264067	0.0166642	0.0175135	0.0197031	0.0162101	0.0161022	0.0152513	0.0221298	0.0182234	0.0126073	0.0139037
0.0153116	0.0144257	0.0160616	0.015932	0.0243297	0.0233153	0.0172484	0.0193677	0.0229421	0.0230056	0.0151087	0.0173392	0.0168287	0.0169825	0.0185657	0.0215251	0.0143182	0.0195845	0.0171945	0.014901	0.0241064	0.0251556	0.01724	0.0173739	0.0248538	0.0237292	0.0221709	0.0243326	0.0219851	0.0252755	0.0216706	0.0229705	0.0243934	0.0258198	0.025539	0.0249726	0.023505	0.0194796	0.0252921	0.0269354	0.0342879	0.031264	0.0262175	0.027871	0.0229973	0.0229037	0.0290534	0.0255992	0.019501	0.0194582
0.0178269	0.0150671	0.0194545	0.0180448	0.0237534	0.0255846	0.0224857	0.0238593	0.0264208	0.028226	0.0212905	0.0223812	0.0192346	0.02022	0.0228977	0.0233415	0.0251121	0.0264013	0.0217766	0.0198709	0.0289498	0.0285586	0.0205088	0.0224648	0.0269442	0.0280203	0.0262187	0.028365	0.0293181	0.0298455	0.0251814	0.0242852	0.0248585	0.0260197	0.0186744	0.0175329	0.030333	0.0292849	0.032244	0.0303696	0.0418209	0.0361707	0.0220237	0.0228004	0.0202522	0.0205188	0.0245551	0.0212776	0.0164397	0.0175978
0.0103131	0.00855123	0.00774863	0.00790263	0.00818599	0.00735838	0.0103143	0.00820869	0.00775259	0.00672341	0.0120517	0.0123905	0.014386	0.0119588	0.0116535	0.00915263	0.0149302	0.015524	0.011158	0.0118369	0.0169035	0.0172975	0.00908118	0.00914407	0.0131292	0.0149976	0.0135755	0.0139688	0.0170201	0.0144508	0.015095	0.0208671	0.0177118	0.0193522	0.0159947	0.011627	0.0233536	0.0191444	0.0236233	0.0250087	0.0157395	0.0165378	0.0173904	0.017075	0.015598	0.0141484	0.021663	0.0189341	0.0117548	0.0122737
0.0101704	0.00840216	0.00885907	0.00866204	0.00849998	0.00767453	0.0098637	0.00908239	0.00765209	0.00648061	0.0121926	0.0116754	0.0136389	0.0116672	0.0113645	0.00912732	0.0158694	0.0154864	0.0124009	0.0135247	0.0163808	0.0164938	0.00884688	0.00822916	0.0127824	0.0145457	0.0132402	0.0139746	0.0169048	0.0154338	0.0133541	0.0185807	0.0164107	0.0196711	0.0147245	0.011072	0.0242303	0.0188979	0.020048	0.0239824	0.0137437	0.0158959	0.0119705	0.0140105	0.0109344	0.0117217	0.0168971	0.0170637	0.00959613	0.0112048
0.0141493	0.0142036	0.0148547	0.0131854	0.0203344	0.0171733	0.0172896	0.0175096	0.0205303	0.0194441	0.0155245	0.0166533	0.016255	0.015294	0.0159608	0.0149213	0.0171813	0.0194539	0.0170202	0.0156479	0.0228117	0.0204372	0.0157685	0.0160215	0.0205347	0.0186703	0.0191969	0.0188142	0.0204278	0.0193775	0.0203989	0.0185792	0.021298	0.0197921	0.0197543	0.0161841	0.0203859	0.0121355	0.0219629	0.0225049	0.0311824	0.0238844	0.0183711	0.0185461	0.0156509	0.0174886	0.0215934	0.0194827	0.0141714	0.0136389
0.0167859	0.0173837	0.0180393	0.0180396	0.022653	0.0235286	0.0213704	0.0226409	0.022762	0.0228083	0.0192665	0.019775	0.0180382	0.0192713	0.0192088	0.0202157	0.0211695	0.0230296	0.0196717	0.0168766	0.030547	0.0264904	0.0200205	0.0212549	0.0292123	0.0258189	0.026459	0.0278476	0.0270033	0.0268007	0.0230627	0.0232541	0.0232583	0.0229574	0.0207009	0.0183244	0.0335635	0.0311924	0.0299839	0.0296122	0.0419131	0.0337853	0.0266815	0.0262344	0.0251268	0.0245981	0.0262503	0.0235033	0.0200122	0.0196384
0.0158474	0.014633	0.0167781	0.0156057	0.0233424	0.023552	0.0184231	0.0205219	0.0228764	0.0244436	0.0182175	0.0194182	0.0172263	0.0182288	0.0191674	0.0198107	0.0202709	0.0222112	0.0182433	0.0167554	0.0256481	0.0243213	0.0185524	0.0192689	0.0243536	0.0245241	0.0253636	0.0271539	0.0222967	0.0243469	0.0201272	0.0206873	0.0227166	0.0237741	0.0211769	0.0193237	0.0270291	0.0258105	0.0269394	0.02832	0.0345545	0.0316994	0.0252965	0.025487	0.0213962	0.0211576	0.0260083	0.0236631	0.0169905	0.01762
0.014191	0.0119775	0.0143719	0.0134283	0.0178136	0.0183148	0.0184865	0.017348	0.0185648	0.0183815	0.0140313	0.0148305	0.0144948	0.0151247	0.0157937	0.0161798	0.0145043	0.0169949	0.0148998	0.0135727	0.0201986	0.0175062	0.0144208	0.0150772	0.0183884	0.0188095	0.0185988	0.0202761	0.0165765	0.0177535	0.0193251	0.0192703	0.0199319	0.0202302	0.0163147	0.0132677	0.0177325	0.0143485	0.0196353	0.0201874	0.0294644	0.0249748	0.0174183	0.0171146	0.0148239	0.014532	0.0176639	0.015868	0.012318	0.012505
0.0147351	0.0147033	0.0158008	0.0161171	0.02295	0.0199598	0.0174978	0.0182327	0.0238749	0.0230074	0.0170518	0.0176794	0.0166317	0.0162417	0.0201644	0.0192414	0.0173544	0.0214038	0.0188909	0.0166796	0.0251152	0.0215962	0.0182816	0.0201004	0.024354	0.023681	0.0224506	0.0239699	0.0238016	0.0247459	0.020921	0.0201901	0.0194988	0.0196292	0.0170473	0.0144687	0.0258315	0.0248355	0.0271557	0.0266209	0.0360524	0.0320311	0.0203732	0.0197501	0.0211936	0.0203137	0.0243321	0.0192242	0.0161194	0.0159041
0.0148612	0.011391	0.0120556	0.0114053	0.0107314	0.0101479	0.0138036	0.0121908	0.0104105	0.00853697	0.0168809	0.0149157	0.0185161	0.0142253	0.0152064	0.0126839	0.0181047	0.0172871	0.0148867	0.0165299	0.019939	0.0192491	0.010993	0.0124026	0.0153139	0.0177713	0.016767	0.0182546	0.0210543	0.0194482	0.0191347	0.0238732	0.0224816	0.0257685	0.0196692	0.0132896	0.0242732	0.0214424	0.0209412	0.0264828	0.0152932	0.0185987	0.0206259	0.0213572	0.0190163	0.0184375	0.0247482	0.0220115	0.0132001	0.0152412
0.013039	0.0134239	0.0172464	0.017033	0.020211	0.0220225	0.0196829	0.0202457	0.021883	0.0234736	0.0173303	0.0171701	0.018176	0.0163491	0.0212165	0.021289	0.0191309	0.0200878	0.0178524	0.0153903	0.0275295	0.0259086	0.0187768	0.0211493	0.023024	0.0225761	0.0236109	0.0254344	0.025981	0.0259448	0.0208449	0.0205984	0.0223232	0.0230815	0.0179705	0.016329	0.0282793	0.0272958	0.0253776	0.0278812	0.0353511	0.0312735	0.0190691	0.0208518	0.0183289	0.0169064	0.0207839	0.0190211	0.0153477	0.0153006
0.0106342	0.00882067	0.00874711	0.00861754	0.00782716	0.00746409	0.0102862	0.00835792	0.00795648	0.00638589	0.0142653	0.0126275	0.0160436	0.0121469	0.0123026	0.00995205	0.0143716	0.0136767	0.0105391	0.0127312	0.0168816	0.0170816	0.00799758	0.00898983	0.013023	0.0145234	0.013766	0.0138188	0.0181702	0.0167377	0.0162744	0.0203676	0.0182945	0.0219879	0.0178493	0.0141979	0.0209179	0.015661	0.020462	0.0247896	0.0148864	0.0161126	0.0158549	0.016545	0.0129897	0.0122266	0.0197033	0.0174353	0.00956555	0.00994323
0.0113585	0.00873429	0.00846451	0.00762245	0.00829259	0.0076222	0.0109018	0.00836646	0.00776751	0.0063797	0.0135638	0.0126255	0.0154616	0.0122629	0.0125327	0.0103874	0.0143627	0.0144875	0.0120701	0.0124427	0.0160728	0.0159553	0.00826082	0.00898545	0.0129648	0.0145954	0.0131206	0.0144635	0.0177606	0.0164814	0.015113	0.0186716	0.0189256	0.0206322	0.0183769	0.0122712	0.019564	0.0148317	0.0186546	0.0231956	0.0134152	0.0149974	0.0139515	0.0131585	0.012356	0.0123611	0.0175418	0.0171518	0.0112934	0.0110455
0.0168543	0.014559	0.0188978	0.0178211	0.021782	0.0236777	0.0206029	0.0218663	0.0220092	0.0255348	0.0177575	0.0206138	0.0195233	0.0198066	0.0227272	0.023014	0.0198836	0.0232842	0.0179981	0.015481	0.0243219	0.0247232	0.0196167	0.0221126	0.0239093	0.0233981	0.0218154	0.022635	0.0234629	0.0268626	0.0219009	0.0211155	0.0193992	0.0224132	0.0198773	0.0181376	0.0272757	0.0257455	0.0279081	0.0287375	0.0377723	0.0333693	0.0226643	0.0228246	0.0204424	0.0213735	0.021193	0.0206568	0.0178513	0.0175639
0.0108254	0.00895424	0.00810774	0.00835062	0.00797475	0.00727171	0.0107222	0.00867835	0.007504	0.00635595	0.0119398	0.0128339	0.013288	0.0109049	0.0105926	0.00905451	0.0134695	0.0134361	0.0121967	0.0128027	0.0147457	0.0151304	0.00854811	0.00903579	0.0117161	0.0135154	0.0130075	0.0136091	0.0155219	0.0146222	0.0153882	0.0180288	0.0188286	0.0197071	0.014195	0.0099942	0.0199715	0.0152834	0.018319	0.0223622	0.0132025	0.0155129	0.0128011	0.0121616	0.0125061	0.0123444	0.0175291	0.0167265	0.00999863	0.0117176
0.00941449	0.00869686	0.00788286	0.0076276	0.00771085	0.00705823	0.00945986	0.00786543	0.00748256	0.00586747	0.0115174	0.0113555	0.0120314	0.0108371	0.0106384	0.00929894	0.012898	0.0145881	0.0107501	0.0115333	0.0143819	0.0147932	0.00874986	0.00891821	0.0112333	0.0126189	0.0121624	0.0135436	0.0148087	0.0137544	0.0137426	0.0166946	0.0171762	0.0193266	0.0144703	0.00986064	0.0188248	0.0152644	0.0169818	0.0219153	0.0125287	0.0141275	0.0129936	0.0141062	0.0115937	0.0124648	0.017364	0.0157166	0.00973278	0.0116076
0.017038	0.0166398	0.0187958	0.0180333	0.0252477	0.0244866	0.0210572	0.0227554	0.0237595	0.0247708	0.0204834	0.0188463	0.0195125	0.0197483	0.020943	0.0217048	0.0239663	0.0257491	0.0199264	0.0186524	0.0317735	0.0289362	0.0185613	0.0209399	0.0268704	0.0252953	0.0266543	0.026785	0.0282789	0.0275877	0.0213136	0.0212871	0.0210416	0.0225795	0.0169422	0.0156478	0.0333184	0.0299848	0.0306968	0.0303341	0.0380229	0.0333392	0.0266956	0.0250543	0.0206663	0.0190503	0.0265995	0.024451	0.0172081	0.0184826
0.00995583	0.00794216	0.00815472	0.00840756	0.00907346	0.00766648	0.00999168	0.00772014	0.00790201	0.00613968	0.0119782	0.0119445	0.0133743	0.0107492	0.0124581	0.0105825	0.0149512	0.0145907	0.0117866	0.0127616	0.0163954	0.0158845	0.00957894	0.00922358	0.0131415	0.0138323	0.0153917	0.0155451	0.017145	0.0170133	0.0160868	0.0180316	0.0175955	0.0181995	0.0141748	0.00946168	0.0219929	0.0165391	0.0193023	0.0214979	0.0141139	0.0153039	0.0151945	0.015073	0.0130278	0.0128331	0.0194634	0.0159622	0.00968584	0.0114421
0.0124657	0.00947835	0.00924291	0.00912429	0.00956169	0.00842277	0.0119941	0.00924164	0.00868703	0.00724409	0.0129037	0.0130302	0.0140263	0.0115302	0.0116512	0.0105802	0.0158985	0.0158409	0.0131865	0.0133865	0.017068	0.0173328	0.00974632	0.00961771	0.0135532	0.0152325	0.0159496	0.0164715	0.0161992	0.0164807	0.0167583	0.0201622	0.0206968	0.0210617	0.0182957	0.0126923	0.0231021	0.0186937	0.0227873	0.0267376	0.0157101	0.0161602	0.0160897	0.0155521	0.0136945	0.0137479	0.0202081	0.0178826	0.0114218	0.0141001
0.0156984	0.01452	0.0195181	0.017948	0.0240563	0.0239053	0.0223491	0.0221529	0.0262596	0.0254939	0.0170849	0.0203887	0.0186641	0.0193873	0.0214398	0.0213111	0.0210661	0.0235546	0.0211534	0.017604	0.0251729	0.0241792	0.0205532	0.0214489	0.0263082	0.0247382	0.0262723	0.0265672	0.0253469	0.0242644	0.0215296	0.0227663	0.0237964	0.0260875	0.0181922	0.0170366	0.0292114	0.0213877	0.0255257	0.0214015	0.033832	0.0255518	0.0218362	0.0209641	0.0203845	0.0203941	0.0218482	0.0201329	0.0157936	0.0151655
0.0174831	0.0156348	0.01706	0.0180958	0.021682	0.0215637	0.0201145	0.0205115	0.0214078	0.0222958	0.0195608	0.0189977	0.0183843	0.0170991	0.0195821	0.0195623	0.0211286	0.0241179	0.0182676	0.0182265	0.0257911	0.0222934	0.0180747	0.0198501	0.0218458	0.0216565	0.0224461	0.023994	0.0259045	0.0251071	0.0198949	0.0186885	0.0213648	0.0220234	0.0197891	0.017731	0.0285306	0.0262164	0.0268517	0.0269007	0.0363961	0.0329286	0.0219065	0.01992	0.0202936	0.0179449	0.0236742	0.0208904	0.0184503	0.0174579
0.0179752	0.016873	0.020978	0.0204357	0.0237882	0.0269089	0.0243261	0.0235395	0.0267491	0.0276562	0.0211672	0.0213561	0.0201157	0.0199339	0.0217715	0.0231328	0.0219118	0.026253	0.0218297	0.0217565	0.0305637	0.0302791	0.0200378	0.0239366	0.0245775	0.024077	0.0242607	0.025625	0.0270233	0.0274559	0.026104	0.0268226	0.0282478	0.0301046	0.026485	0.0242586	0.0238512	0.025137	0.0319823	0.0320343	0.0405742	0.0372671	0.0244967	0.0242612	0.0222633	0.0215987	0.027084	0.0238269	0.0192826	0.019582
0.00777042	0.00579592	0.00546568	0.00457639	0.00606366	0.0050148	0.00679382	0.00474795	0.00537962	0.00430895	0.00914668	0.00757045	0.00906283	0.00725781	0.0081698	0.00665381	0.0110427	0.0104633	0.00704434	0.00831808	0.0118415	0.0123245	0.00558646	0.00585659	0.00909466	0.00972749	0.00917131	0.010579	0.011459	0.00965386	0.00850329	0.0126303	0.0140665	0.0155357	0.0111311	0.00901482	0.0165665	0.0126568	0.014866	0.0189318	0.0101605	0.01188	0.0103233	0.01164	0.00939242	0.00901987	0.0143696	0.0135014	0.00875901	0.00846678
0.0162525	0.0150281	0.017044	0.0166418	0.0211371	0.0233866	0.0203137	0.0220791	0.0225839	0.0248269	0.0170099	0.0177331	0.0171926	0.0170691	0.018522	0.0208107	0.0198096	0.0225641	0.0177613	0.0163605	0.0283425	0.029765	0.0170623	0.0190298	0.0240363	0.0242681	0.0244928	0.0256519	0.0240205	0.0255076	0.0232958	0.0235495	0.0254288	0.0274292	0.0274101	0.0252139	0.0261742	0.0249601	0.0319935	0.029953	0.0366941	0.0337636	0.0216216	0.0219177	0.0203202	0.0200015	0.0257619	0.0218461	0.0171687	0.0165784
0.0138336	0.0111984	0.00926527	0.00928786	0.0101654	0.00900613	0.0120819	0.0100553	0.00912489	0.00743107	0.0140877	0.0142003	0.0160478	0.0130129	0.0133619	0.0115289	0.0167085	0.0171829	0.013153	0.0151352	0.0190329	0.0194613	0.00988724	0.0110381	0.0144829	0.0162912	0.0160227	0.0165357	0.0191752	0.0179411	0.0177447	0.0220485	0.0233961	0.0254842	0.0191511	0.0145806	0.0206004	0.0170441	0.0225204	0.0258412	0.0154327	0.016675	0.0179475	0.0188067	0.0155798	0.0157636	0.0234903	0.0204484	0.0121957	0.0127038
0.0202857	0.0182145	0.0225821	0.0201751	0.0271775	0.0260977	0.0254774	0.024455	0.0280124	0.0266183	0.0200919	0.0226034	0.0218114	0.0220794	0.0219651	0.0218197	0.0230769	0.023614	0.0233911	0.0222214	0.0312498	0.0315295	0.0225887	0.0235284	0.0265955	0.0261487	0.0282683	0.0281537	0.0272645	0.027116	0.027812	0.0273292	0.0294312	0.0323244	0.0206534	0.0179707	0.0254475	0.0249671	0.0295759	0.0304491	0.0362076	0.0318531	0.024903	0.0235178	0.0212429	0.0221366	0.0259012	0.0221438	0.0171959	0.0163094
0.0096353	0.00807872	0.00743835	0.00653369	0.00799888	0.00682884	0.00920776	0.00706173	0.0074437	0.00618992	0.0117083	0.0121075	0.0131063	0.0107693	0.0113173	0.00944174	0.0131044	0.0147639	0.00941285	0.0104834	0.0140764	0.0139748	0.00730469	0.00843098	0.0116534	0.0134463	0.0129933	0.013445	0.0135854	0.0135921	0.0126233	0.0169388	0.0157818	0.0182454	0.0143294	0.0110491	0.0168152	0.012394	0.0164613	0.0200192	0.0120143	0.0122686	0.014671	0.0155925	0.0122019	0.0130574	0.0179706	0.0167954	0.00999618	0.0103923
0.0106092	0.00892929	0.00830267	0.00808938	0.00885487	0.00791122	0.010709	0.00895728	0.00848737	0.00662506	0.0130461	0.0130076	0.015201	0.0132203	0.013191	0.0114328	0.014196	0.0140767	0.0116818	0.011664	0.0167798	0.0170028	0.00952948	0.00970997	0.0130852	0.0146095	0.0139472	0.0140993	0.0162418	0.015907	0.0182354	0.0198901	0.0190628	0.0187959	0.017577	0.0119168	0.020041	0.0148709	0.0197132	0.0213366	0.0140498	0.0154548	0.0148685	0.0141871	0.0142668	0.0127218	0.0177512	0.0152199	0.0100088	0.0112153
0.0116196	0.00993543	0.00905177	0.00859742	0.0095699	0.00860348	0.0114747	0.0094137	0.00903537	0.00757684	0.0135502	0.0135957	0.0151795	0.01311	0.0140649	0.0118086	0.0162787	0.0156838	0.0110718	0.013069	0.0178438	0.0179784	0.00915032	0.0103091	0.0141145	0.0156266	0.016011	0.0167906	0.0184422	0.0161456	0.0177807	0.0197855	0.0180339	0.0199832	0.0174894	0.0117569	0.0256751	0.0210753	0.0231229	0.0256024	0.0180194	0.0181754	0.0167555	0.0164394	0.0147986	0.014756	0.0212972	0.0192795	0.0110105	0.0130967
0.0139217	0.0113002	0.0101615	0.00997304	0.0102797	0.00942059	0.0146898	0.0108493	0.0091556	0.00799832	0.0159953	0.015527	0.017139	0.0141118	0.0137663	0.0123011	0.0174731	0.0183522	0.0138026	0.0146154	0.0193044	0.0187392	0.0101926	0.011486	0.0158281	0.0168651	0.0170052	0.0182472	0.020529	0.0199824	0.0193047	0.0229014	0.0224396	0.0233191	0.017586	0.0122084	0.0261165	0.02106	0.0239815	0.0304199	0.0193343	0.0192853	0.0197387	0.0192958	0.0169249	0.0173911	0.0225537	0.0216162	0.0134136	0.0156437
0.0199114	0.0190042	0.0202629	0.019033	0.0267378	0.0245175	0.0233704	0.0244636	0.025104	0.0262548	0.0196979	0.0232107	0.0194364	0.0211703	0.0207212	0.0213158	0.0199681	0.025418	0.0195301	0.018729	0.0278167	0.0276511	0.0195738	0.0214425	0.0257252	0.0249641	0.0256143	0.0258026	0.0256003	0.0280224	0.0241125	0.0235171	0.0255763	0.028011	0.0265478	0.0239218	0.026465	0.0258054	0.0298214	0.0305377	0.0389018	0.03487	0.0234733	0.0241823	0.0198177	0.0217491	0.0260236	0.0240999	0.0169329	0.0184247
0.0180003	0.0187924	0.0205585	0.0188041	0.0278449	0.0257665	0.0241944	0.0244021	0.0262145	0.0269906	0.0179504	0.0204379	0.0194933	0.0189315	0.0231301	0.0232674	0.0226456	0.0252824	0.0203611	0.0211543	0.0276382	0.0263512	0.0207378	0.0229215	0.0284298	0.0278004	0.0262616	0.0279599	0.0250706	0.025775	0.0281692	0.0272581	0.0252805	0.0271322	0.0246849	0.024387	0.0266936	0.0208839	0.0285478	0.031077	0.0348247	0.033414	0.0313223	0.031639	0.0244667	0.0251734	0.0302062	0.0270294	0.0208506	0.0225226
0.0163108	0.0167268	0.0185365	0.0178786	0.0242472	0.0226441	0.0197153	0.0208341	0.0255522	0.0237716	0.0199576	0.0189852	0.018917	0.0180781	0.0206505	0.0205908	0.0227149	0.0234146	0.0188763	0.0172196	0.0268556	0.0255049	0.0200154	0.0223609	0.0257046	0.025318	0.0249813	0.0236615	0.0264185	0.0267942	0.022726	0.0225769	0.0231333	0.024013	0.0204949	0.0194421	0.0313431	0.0303538	0.0287275	0.0295317	0.0349333	0.0342755	0.0243312	0.0250166	0.0205514	0.019768	0.0263194	0.0243006	0.0165037	0.0170508
0.0153235	0.0136527	0.0171985	0.0164038	0.021958	0.0218387	0.0187505	0.0200494	0.0220649	0.0215155	0.0166252	0.0191089	0.0167131	0.0167572	0.0199369	0.0202675	0.0207697	0.0227704	0.0188796	0.0165009	0.0293014	0.0253137	0.0181195	0.019461	0.0236284	0.0226156	0.0230851	0.0250035	0.0249198	0.0247239	0.0214582	0.0210456	0.0208813	0.0226069	0.0188564	0.0193345	0.0270847	0.027137	0.025845	0.0268668	0.0322372	0.0301478	0.0208302	0.0215589	0.0199663	0.0188749	0.0230033	0.0213941	0.0138106	0.0145595
0.0153633	0.0130235	0.019754	0.0178225	0.0213706	0.0206727	0.0199317	0.0207869	0.021578	0.0221002	0.0189115	0.0201115	0.0177453	0.0182611	0.0186533	0.0191504	0.0201264	0.0222847	0.0220914	0.019058	0.0236802	0.0246806	0.0197995	0.0217164	0.0223996	0.0226271	0.02195	0.0222303	0.0239989	0.0247726	0.0210206	0.0208324	0.0219216	0.0228063	0.0151493	0.0125507	0.0237181	0.0234777	0.0225634	0.0243373	0.0328591	0.0292383	0.018689	0.0183206	0.0177911	0.0173283	0.0205604	0.0187758	0.014696	0.0153879
0.017681	0.0157973	0.0194831	0.018908	0.0239296	0.0254239	0.0234202	0.0215595	0.0245433	0.0257699	0.0208086	0.0203262	0.0216375	0.0201288	0.021271	0.0212511	0.0219557	0.0240678	0.0226225	0.0170717	0.0265276	0.0283499	0.0210768	0.0233911	0.0266019	0.0270601	0.0270529	0.0264571	0.0254679	0.0238448	0.0231707	0.0221189	0.0218042	0.0215675	0.0211262	0.0187694	0.0290338	0.0284192	0.0278083	0.0275202	0.0370659	0.0306852	0.0250743	0.0273928	0.022199	0.0241114	0.0260394	0.0240655	0.0202577	0.0218427
0.020351	0.0179257	0.0203231	0.0206192	0.0265043	0.0256598	0.0230874	0.0239268	0.0256475	0.0280067	0.0207879	0.0194079	0.0214395	0.0214954	0.0243337	0.0247126	0.0202069	0.0240249	0.0218304	0.0204055	0.0292313	0.0238566	0.0218295	0.0243405	0.0276294	0.0269919	0.0260323	0.0272029	0.0239197	0.02683	0.0266937	0.0238942	0.0247108	0.0257545	0.0236236	0.0211164	0.0312802	0.0272474	0.0313519	0.0320115	0.0403096	0.0360706	0.0234184	0.0237695	0.0207481	0.0216081	0.0273544	0.0245762	0.0173582	0.019718
0.0159155	0.0150518	0.019062	0.020107	0.0265092	0.0240988	0.0222149	0.0223549	0.0240456	0.0246832	0.0177691	0.0185987	0.0182783	0.0175317	0.0196002	0.0205057	0.0189237	0.0221425	0.0175806	0.0137621	0.0275854	0.024244	0.0179156	0.019802	0.0224601	0.0231049	0.0226219	0.0245235	0.0229954	0.0249597	0.0225707	0.0225186	0.024867	0.0258505	0.0278486	0.0247042	0.0214328	0.0236773	0.0220193	0.0278873	0.0335801	0.0345421	0.0259945	0.0269058	0.0215621	0.0212467	0.0262126	0.0235129	0.0203366	0.0194989
0.0102317	0.00851033	0.00839848	0.00798746	0.00896598	0.00785362	0.0104877	0.00786833	0.00839327	0.00707161	0.0136277	0.0116969	0.0145133	0.0113243	0.012149	0.00951409	0.0148985	0.0146933	0.0121618	0.0131257	0.0163359	0.0170776	0.00952682	0.00952417	0.0130103	0.0151306	0.0142569	0.0153609	0.0160835	0.0149005	0.0151041	0.0203816	0.0174557	0.0198426	0.0153315	0.0109692	0.0202691	0.0160176	0.0178189	0.0234677	0.012912	0.0163745	0.0132827	0.0132907	0.0122766	0.0118325	0.0176175	0.014969	0.0102918	0.010463
0.0172534	0.0159888	0.0168181	0.0161912	0.0247157	0.0232487	0.0204704	0.0226969	0.023017	0.0239635	0.0175007	0.0204937	0.0192925	0.0206342	0.0201655	0.0210867	0.0208189	0.0243946	0.0196194	0.0164753	0.0215618	0.0222266	0.0157612	0.0180806	0.0234922	0.0230758	0.0246595	0.0249167	0.0229682	0.0249787	0.0215109	0.0218784	0.0237471	0.0253565	0.0198714	0.0185302	0.0190488	0.0217854	0.0212345	0.0254184	0.027029	0.0262391	0.0242511	0.0245468	0.0238315	0.0220007	0.0248854	0.0209033	0.01981	0.018001
0.0147925	0.0165298	0.0176734	0.0180295	0.0235778	0.0243636	0.0194523	0.0199803	0.0218069	0.0229134	0.0179341	0.0181366	0.0169957	0.01672	0.0195074	0.0197263	0.0178679	0.0225558	0.0186524	0.0155775	0.0225879	0.0236406	0.0177921	0.0201224	0.0233881	0.0248858	0.0222084	0.0223565	0.0228486	0.024598	0.0211996	0.0198872	0.02164	0.0204994	0.0211532	0.0194096	0.0226053	0.0222424	0.0268403	0.0285392	0.0362036	0.0332473	0.0219335	0.0228671	0.0180826	0.0203496	0.0230499	0.0210155	0.018726	0.0176553
0.0143587	0.0148207	0.0172113	0.0174184	0.0231828	0.0211764	0.0171719	0.017966	0.0202625	0.0203917	0.0136168	0.0145963	0.0152048	0.0164537	0.0168	0.0164445	0.0150491	0.0185594	0.017901	0.0160702	0.0208931	0.0202632	0.016817	0.0180691	0.0225954	0.0218133	0.0199344	0.0209866	0.0193093	0.0217978	0.0200332	0.0192391	0.0201836	0.0202546	0.0175671	0.0174931	0.0233818	0.0230081	0.0233523	0.0251065	0.0324726	0.0301499	0.0173208	0.0185803	0.0164586	0.0168134	0.020587	0.0181229	0.0144074	0.0145881
0.0165203	0.0144295	0.0185503	0.0169765	0.0223758	0.0228351	0.0199482	0.0207351	0.0240001	0.0244394	0.0184381	0.0195318	0.0184316	0.018411	0.0201406	0.0208781	0.0205105	0.0219772	0.0199712	0.0195011	0.0269475	0.0242829	0.0195487	0.0222874	0.0243866	0.0250591	0.0234901	0.0241136	0.0260645	0.0262641	0.0208295	0.0208417	0.0213913	0.0234964	0.0176753	0.0170094	0.0302304	0.0294124	0.0259044	0.0280612	0.0352348	0.0347577	0.019211	0.0173086	0.0191273	0.0171344	0.0238057	0.0196001	0.016761	0.0160177
0.0109191	0.0089123	0.00870944	0.00875742	0.00934415	0.00870926	0.011028	0.0104336	0.00865685	0.0070207	0.0127135	0.0131721	0.0157128	0.0137333	0.0133952	0.0115563	0.0158265	0.0163681	0.0123053	0.0140155	0.0173636	0.0166249	0.00967367	0.0118977	0.0138634	0.0157722	0.0141779	0.0170295	0.0177365	0.0161858	0.0170585	0.0222968	0.017749	0.0219366	0.0160799	0.0117323	0.0235668	0.0203754	0.0196308	0.0261657	0.0144424	0.0171352	0.0151563	0.0158205	0.0141376	0.0139503	0.0186425	0.018009	0.0105626	0.0121975
0.017583	0.0159092	0.0186389	0.0184113	0.0237334	0.0255034	0.0206045	0.0211669	0.0236281	0.0238182	0.019173	0.0181009	0.0186846	0.0181124	0.0212461	0.0220544	0.020965	0.0233842	0.0197163	0.0176529	0.0270187	0.0265499	0.0184977	0.0215655	0.0247606	0.0252497	0.0258613	0.0284695	0.0255608	0.0254316	0.0199155	0.0207813	0.0227194	0.022934	0.021734	0.0202331	0.0265141	0.0261975	0.0260311	0.0283346	0.0335313	0.0325443	0.021574	0.0211395	0.0208087	0.0211248	0.0240468	0.0214168	0.0167236	0.0191497
0.0181005	0.0177035	0.0186377	0.0184708	0.0240329	0.0221285	0.0214624	0.0225943	0.0240333	0.0236833	0.0194953	0.02192	0.020699	0.0200103	0.0232815	0.0224281	0.0201764	0.0248531	0.0207171	0.0170127	0.0300736	0.0261689	0.0187529	0.0207916	0.0231877	0.0236823	0.0248176	0.0249699	0.0238857	0.0269047	0.022677	0.021004	0.0247355	0.0246618	0.0240269	0.0219427	0.0303867	0.0274414	0.026589	0.0284454	0.0371895	0.0330043	0.0191784	0.0187576	0.0186652	0.0180851	0.0216135	0.0199833	0.016087	0.0172164
0.0174171	0.0156196	0.0213202	0.0209574	0.0260772	0.0241615	0.0212537	0.0226317	0.0234815	0.025419	0.0202936	0.019071	0.018636	0.0187546	0.0225078	0.0219335	0.0214526	0.0217175	0.0179196	0.0165202	0.0295984	0.0271945	0.0188554	0.0195711	0.0233403	0.0231902	0.0242601	0.0242942	0.0218334	0.0231266	0.0254804	0.0247566	0.0234328	0.0246897	0.0214489	0.018277	0.0233188	0.0178902	0.0266956	0.0259871	0.0345027	0.0281961	0.0195608	0.0194698	0.0160041	0.0174409	0.0210205	0.0179048	0.0139482	0.013476
0.0117394	0.0104753	0.00947388	0.00919236	0.0100994	0.00885846	0.0119581	0.0101673	0.00908944	0.0074009	0.0135794	0.0134619	0.0154675	0.0131455	0.0143922	0.0123563	0.016875	0.0164241	0.0129068	0.0139071	0.0175813	0.0168961	0.0104749	0.0109773	0.0144874	0.0156482	0.0156578	0.0161826	0.0185992	0.0184122	0.0185247	0.0218385	0.0202408	0.0214753	0.0179937	0.0126812	0.0259073	0.021004	0.0250908	0.0278313	0.017142	0.0163001	0.0168646	0.0176552	0.0154535	0.0147951	0.0193095	0.0186565	0.0119356	0.0143164
0.0166461	0.0167833	0.0160375	0.0151547	0.0201128	0.0218927	0.019262	0.020288	0.0219288	0.0210989	0.0176375	0.016718	0.0164974	0.0170443	0.018349	0.017694	0.0159834	0.020683	0.0174013	0.0158961	0.0214524	0.021494	0.0156296	0.0180823	0.0225406	0.0218273	0.0199447	0.0221347	0.0185707	0.0201739	0.0212529	0.0207107	0.0230047	0.0227616	0.0230289	0.0209816	0.0175802	0.0175211	0.0214445	0.0242547	0.0285296	0.0264697	0.0203209	0.0205187	0.018302	0.0183032	0.0246213	0.0189504	0.0176808	0.0148227
0.0166434	0.0166827	0.0177149	0.0206168	0.0204487	0.0217442	0.0186278	0.0206111	0.0214446	0.0210295	0.017691	0.0164013	0.0155512	0.014715	0.0168457	0.017939	0.0196561	0.0209751	0.0190424	0.0204429	0.0220884	0.0205385	0.018097	0.0186839	0.0209949	0.0214264	0.021276	0.0223226	0.024795	0.0256533	0.0207541	0.0199626	0.0212987	0.0235437	0.0199501	0.0177657	0.0246268	0.0240338	0.0228485	0.0256828	0.0356546	0.0337182	0.0216713	0.0235296	0.0218284	0.0211957	0.0211329	0.0200849	0.0191528	0.019778
0.0149227	0.0144246	0.019196	0.0179735	0.0222323	0.0220882	0.0199458	0.0203842	0.0232245	0.0239724	0.0193521	0.0184834	0.019494	0.0186421	0.0216611	0.0222168	0.0215236	0.0227221	0.019462	0.0170146	0.0264926	0.0266481	0.0197367	0.0225268	0.0236894	0.023062	0.0237872	0.0243526	0.0271022	0.0264602	0.0185906	0.0190928	0.0206174	0.0224483	0.0196906	0.0174481	0.0307908	0.0283023	0.0265787	0.0272635	0.0370385	0.0311294	0.0178985	0.0163209	0.0160029	0.0156256	0.0205474	0.0189674	0.0129995	0.0141755
0.015169	0.014084	0.0186516	0.0170149	0.0208064	0.0214663	0.0204641	0.0213349	0.0217268	0.0239771	0.0177708	0.0167169	0.0174726	0.0167481	0.0195127	0.0198588	0.019942	0.0201013	0.0197237	0.0167323	0.0256426	0.0235247	0.0175161	0.0201016	0.0216497	0.0221914	0.0230046	0.022956	0.0227683	0.0235457	0.0186324	0.0197252	0.0198564	0.0217565	0.0174471	0.0154158	0.0254869	0.0206269	0.0255035	0.0266259	0.0355915	0.0318483	0.019829	0.0194876	0.0184104	0.0166773	0.021772	0.0182694	0.0165019	0.0142221
0.0176016	0.0154443	0.021605	0.0209276	0.0246473	0.0250026	0.0231358	0.023478	0.0244125	0.0250407	0.0203126	0.019797	0.0210896	0.0217832	0.0224911	0.0234347	0.0195329	0.0224463	0.0228909	0.0196494	0.0242606	0.0253187	0.0222545	0.0240005	0.0250337	0.0237592	0.0255185	0.0258975	0.023569	0.0264889	0.0208875	0.0216889	0.0219143	0.0228484	0.0191212	0.0164191	0.0256632	0.026902	0.0263615	0.0282477	0.0353085	0.0332851	0.0206217	0.0219473	0.0195983	0.0189668	0.0263217	0.0207052	0.0177189	0.0172595
0.0125655	0.00978505	0.00862311	0.00865581	0.00929736	0.008417	0.0113788	0.00830076	0.00787377	0.00672982	0.0138893	0.012813	0.0150412	0.0113612	0.0116767	0.00951463	0.0153861	0.015097	0.0113897	0.0120384	0.0181964	0.01943	0.00935522	0.0101272	0.0136822	0.0156953	0.0142473	0.0145769	0.0159199	0.0151524	0.0139153	0.0188295	0.0208149	0.0221017	0.020672	0.0144994	0.0232432	0.0174569	0.0213261	0.0232365	0.0159829	0.017088	0.0184137	0.0185136	0.0164254	0.0169728	0.0219177	0.0203408	0.014148	0.0154247
0.0137881	0.0133512	0.0151623	0.0143822	0.0210131	0.0197795	0.015873	0.0169993	0.0189442	0.0178602	0.016059	0.0179708	0.0149651	0.0153297	0.0167094	0.0172992	0.0157147	0.0185379	0.0163371	0.015817	0.023331	0.0199517	0.0163111	0.017863	0.0213407	0.0195013	0.021843	0.0197744	0.0193444	0.0207048	0.0176092	0.0173441	0.0185928	0.0190108	0.0155016	0.0136168	0.0199949	0.0189627	0.0192514	0.0203671	0.0289124	0.0260512	0.0183321	0.0206074	0.0164351	0.0164749	0.0193346	0.0175126	0.0135045	0.0133267
0.0149504	0.0135691	0.016276	0.0163356	0.0193078	0.020275	0.01752	0.0185078	0.0195822	0.020845	0.016646	0.0179806	0.0160861	0.0160272	0.017205	0.0174816	0.0198746	0.0200273	0.0183482	0.0178775	0.0223338	0.020712	0.0170522	0.0203577	0.0214831	0.021769	0.0206448	0.0229016	0.0221845	0.0220031	0.0178975	0.0172639	0.0195592	0.0197963	0.0157412	0.0138207	0.0217052	0.0178731	0.0221712	0.0228947	0.0288448	0.0249516	0.0201391	0.0173228	0.0179202	0.0178108	0.0209504	0.0180117	0.0156794	0.0154536
0.0186148	0.0156779	0.0197565	0.0177842	0.0266791	0.0278356	0.0222319	0.0219596	0.0279918	0.0292295	0.0193908	0.0203822	0.0208524	0.0207117	0.0214142	0.0220195	0.0220063	0.0237174	0.0197161	0.0166247	0.0242002	0.0227164	0.019783	0.0221541	0.0260591	0.0252735	0.0252251	0.0261095	0.0251095	0.0224716	0.0216396	0.0205876	0.0238642	0.0243609	0.0234618	0.0211533	0.0203374	0.0192651	0.0231085	0.0240689	0.0269362	0.0252068	0.0262269	0.0251347	0.0251819	0.0236794	0.0245967	0.0211495	0.0240507	0.0220082
0.0187365	0.0171575	0.0179364	0.0184258	0.0236864	0.0228005	0.0199	0.023138	0.0231866	0.0226454	0.0163212	0.0205433	0.015575	0.0183016	0.0207487	0.020658	0.0173178	0.022682	0.0194396	0.0176764	0.0282672	0.025408	0.0189922	0.0219664	0.0263085	0.0248874	0.0243288	0.0248463	0.0206013	0.0234873	0.0258606	0.0261088	0.0254405	0.0259678	0.0244075	0.0220112	0.0270073	0.025509	0.0283558	0.0290859	0.038248	0.0384202	0.0211476	0.0227045	0.0229407	0.0197087	0.0254195	0.0203522	0.0194908	0.0175707
0.0145133	0.0111751	0.0106099	0.0114004	0.011214	0.00970715	0.0146787	0.0125087	0.00985373	0.00812191	0.0147193	0.0144135	0.0167548	0.0134085	0.0141813	0.0125011	0.0181368	0.0166149	0.0151673	0.0147968	0.0197686	0.0189807	0.0108369	0.00984358	0.0146702	0.0176272	0.016788	0.0177186	0.0197843	0.0189499	0.0183689	0.0228238	0.0251078	0.0244944	0.0226038	0.0137298	0.0257205	0.0196028	0.0259151	0.0276857	0.017015	0.0188506	0.0162197	0.0175461	0.016442	0.015297	0.0215542	0.0196733	0.0128046	0.0161058
0.0176389	0.0155526	0.0194743	0.0181519	0.0234641	0.0250141	0.0212039	0.0219807	0.0245112	0.0257511	0.0207292	0.0214018	0.0188677	0.0205639	0.0201769	0.0214737	0.0210787	0.023086	0.0220937	0.0199377	0.023976	0.0256356	0.0217988	0.0233166	0.0260921	0.0266186	0.024817	0.0253234	0.0248414	0.0258563	0.0242297	0.0243364	0.024554	0.0256813	0.0197607	0.0172753	0.0262314	0.0236256	0.0295544	0.0284226	0.0399158	0.0333841	0.023255	0.0223609	0.0220586	0.0196779	0.023067	0.0199613	0.0175863	0.0153553
0.0185266	0.0176234	0.0195336	0.0207483	0.024096	0.0248044	0.0242249	0.0241833	0.0255493	0.0246674	0.0216356	0.0216429	0.0202251	0.0207989	0.0208549	0.0203728	0.0219768	0.0245673	0.0232017	0.0203426	0.0265239	0.0291518	0.0177519	0.0213626	0.0284004	0.0274574	0.0258397	0.0285641	0.0265339	0.0284261	0.025806	0.025447	0.0269118	0.0289449	0.022783	0.021674	0.023199	0.0253831	0.0291179	0.0294337	0.0353894	0.0342308	0.0220848	0.0220667	0.0213764	0.0228194	0.027982	0.0224452	0.0200662	0.0185448
0.0092563	0.00863466	0.00756045	0.00735278	0.00764769	0.00653659	0.00882976	0.00747622	0.00730949	0.00629098	0.0114621	0.010489	0.0119515	0.0106481	0.0102647	0.00914183	0.0129727	0.0134367	0.00969932	0.0114312	0.0148426	0.0142996	0.0082291	0.00822449	0.011623	0.0126577	0.0126948	0.0136547	0.0144594	0.0137782	0.013963	0.0174151	0.0160962	0.0183104	0.0143072	0.00917768	0.0187666	0.0166289	0.0175582	0.0212163	0.0139882	0.0141968	0.0138785	0.0152168	0.0118252	0.0115627	0.0167694	0.0153869	0.00918326	0.0101861
0.00986533	0.00855747	0.00827354	0.00814592	0.00848596	0.00731248	0.0110699	0.00821853	0.0076622	0.00630546	0.012147	0.0117802	0.0141425	0.0109349	0.0113796	0.00969992	0.0147563	0.0146486	0.0101517	0.0124371	0.0169101	0.0164097	0.00915342	0.00906095	0.012633	0.0142566	0.0146126	0.0146608	0.0177759	0.0164713	0.0160645	0.0190537	0.017632	0.0194897	0.0152396	0.0108124	0.0210318	0.0183246	0.0178889	0.0230286	0.0146578	0.0161985	0.0139156	0.01471	0.0131096	0.0127535	0.0177429	0.0164219	0.0105243	0.0109671
0.018277	0.016758	0.0193754	0.019499	0.0254194	0.0268608	0.0215933	0.0228348	0.0250667	0.0271946	0.020081	0.0206544	0.0191943	0.0209462	0.0226694	0.0241167	0.0242109	0.0246629	0.021308	0.0196968	0.0326346	0.0304504	0.0204722	0.0225433	0.0261979	0.026886	0.0255354	0.0267952	0.0288055	0.0283887	0.0232985	0.0230825	0.025996	0.0274057	0.026615	0.0230945	0.0304519	0.0317106	0.0313609	0.0311458	0.0394505	0.0367928	0.0254795	0.0259625	0.0219429	0.0221889	0.0258549	0.0237544	0.0195741	0.0194869
0.0228461	0.0187516	0.0212064	0.0200022	0.0260268	0.0222593	0.0257013	0.0244906	0.0224169	0.0195128	0.0224315	0.0236277	0.0225797	0.0228581	0.0241987	0.02362	0.026954	0.0262626	0.0243428	0.0249513	0.0307455	0.029091	0.021227	0.0220673	0.0281423	0.0263333	0.0272142	0.0284176	0.0281358	0.0286336	0.0290239	0.0282531	0.0311919	0.0333845	0.0253088	0.0238703	0.030325	0.0283224	0.0323806	0.0324396	0.0363364	0.0342905	0.0248815	0.0240649	0.0222133	0.0243092	0.0291473	0.0260612	0.0198439	0.0221344
0.017591	0.0179993	0.020142	0.020149	0.0238195	0.0240516	0.0236854	0.0252199	0.0258326	0.0261038	0.0180349	0.0220629	0.0200985	0.0205825	0.0210962	0.0219207	0.0186944	0.0228922	0.0202489	0.017108	0.0281724	0.0279169	0.0201254	0.0199533	0.0265173	0.0245907	0.0243025	0.0266633	0.0200726	0.0223025	0.0279407	0.0265422	0.0274951	0.0286499	0.0222834	0.0207381	0.0210268	0.0240449	0.0227105	0.02798	0.02748	0.0302282	0.0233421	0.0256111	0.0220379	0.0200098	0.0258444	0.0223911	0.0180205	0.0163482
0.0199152	0.0188451	0.0215069	0.0229457	0.026675	0.0255728	0.0240646	0.0256073	0.0235022	0.0273062	0.0196899	0.0216787	0.0203174	0.0203782	0.0221737	0.0225842	0.0203	0.0239589	0.0216247	0.0173107	0.0313889	0.0303557	0.0208421	0.0239145	0.0273313	0.0296161	0.0291532	0.0304649	0.0245456	0.0266615	0.0310376	0.0291815	0.0274065	0.0272851	0.0262286	0.0274991	0.0239012	0.0200193	0.0342898	0.036046	0.0432227	0.0368158	0.0259339	0.0251173	0.0219889	0.0213845	0.0295012	0.0278589	0.017295	0.0168372
0.0144169	0.0132371	0.0175811	0.0168416	0.0231393	0.0230753	0.0186641	0.0192714	0.023921	0.0261821	0.0187822	0.0186032	0.0188317	0.0176619	0.0213682	0.0218012	0.0184862	0.0216281	0.0207245	0.0172957	0.0251356	0.0246769	0.0187658	0.0210818	0.0254408	0.0244967	0.023291	0.0251432	0.0257725	0.0255771	0.0211393	0.0228317	0.0228856	0.0231456	0.0257157	0.0220763	0.0245943	0.0206668	0.0243336	0.0236754	0.0359892	0.0276165	0.0241643	0.0220858	0.0221495	0.0211875	0.0222271	0.0217418	0.0168801	0.0183697
0.0109898	0.0102265	0.00858617	0.00889635	0.0100594	0.00856463	0.0108746	0.00883238	0.00859186	0.00735645	0.0125502	0.0128179	0.0147292	0.0118196	0.0138833	0.0109873	0.0156315	0.0155385	0.0134214	0.014572	0.01668	0.0165379	0.0101835	0.0100987	0.0139106	0.0157971	0.015794	0.0169093	0.0190006	0.0183469	0.0176493	0.0201368	0.0202556	0.0194049	0.017	0.0113156	0.0228018	0.0187739	0.0205175	0.0237864	0.015577	0.0170975	0.0146549	0.0159103	0.0143002	0.0151947	0.0196904	0.017934	0.0104341	0.0133297
0.00972995	0.00893105	0.007887	0.00792511	0.00813428	0.00714098	0.00999414	0.00878823	0.00775073	0.00636713	0.0128795	0.0123146	0.0134112	0.01015	0.0108362	0.00913782	0.0141374	0.0150386	0.0108916	0.0113144	0.0143079	0.0147932	0.00859907	0.00930191	0.0122197	0.0140966	0.0130716	0.0148872	0.0155176	0.0143239	0.015322	0.0184906	0.0168112	0.0181855	0.0141448	0.0101051	0.0171866	0.0140303	0.0166235	0.0193553	0.0121384	0.0131779	0.0162799	0.0160466	0.0133961	0.0131169	0.018826	0.0164827	0.0107873	0.0113186
0.0153508	0.0159342	0.0165699	0.0180877	0.0216151	0.0214932	0.0180194	0.0194244	0.0213605	0.0217215	0.017533	0.0181077	0.0158003	0.017439	0.0197668	0.0212461	0.0165028	0.0210833	0.019461	0.0163299	0.0300185	0.0257357	0.0189011	0.0191931	0.0231058	0.0242494	0.0225055	0.0249453	0.0227878	0.024023	0.0247478	0.0230007	0.0225602	0.0212624	0.0196965	0.0182892	0.0222165	0.0236654	0.0268088	0.0273012	0.03733	0.0324234	0.0179306	0.0186184	0.0170665	0.0170386	0.0226382	0.0195004	0.0153301	0.0149731
0.0192831	0.017414	0.021483	0.0200485	0.0291257	0.0287558	0.0228456	0.0242551	0.026361	0.0247499	0.0192205	0.0203553	0.0205628	0.0220747	0.0212637	0.0224902	0.0212757	0.0218221	0.0214858	0.0205729	0.0328674	0.028937	0.0223619	0.0227315	0.0308004	0.0304251	0.0296082	0.0294101	0.028383	0.0286374	0.027567	0.0278241	0.0278086	0.0288571	0.0241565	0.0241301	0.0284995	0.0263031	0.0307477	0.028899	0.040701	0.0363618	0.0238194	0.0218637	0.020806	0.0201242	0.0247318	0.0230267	0.0176785	0.0165154
0.0179859	0.0170783	0.0209487	0.019848	0.0272126	0.025157	0.023322	0.0239799	0.0257427	0.0259813	0.0188696	0.0201837	0.0202089	0.0190522	0.0218667	0.0210961	0.023512	0.0253139	0.0221712	0.0186119	0.0308027	0.0282565	0.0212793	0.0232549	0.0312974	0.0282922	0.0295155	0.0288775	0.0280628	0.0281022	0.0256428	0.0258963	0.0229152	0.0238109	0.0160287	0.0150027	0.028598	0.0250127	0.0286676	0.0291327	0.037689	0.032215	0.0232399	0.0222478	0.0214608	0.0215903	0.024974	0.0206867	0.0178158	0.018401
0.00812788	0.00680361	0.00708624	0.00572156	0.00742274	0.00680882	0.00772237	0.00635684	0.00723835	0.00597294	0.0106098	0.0106291	0.0127075	0.0107018	0.0110872	0.00933326	0.0125516	0.0131886	0.00803712	0.0095673	0.0154147	0.0153009	0.0074111	0.00765123	0.0111243	0.0132026	0.0111267	0.0129662	0.013899	0.0121056	0.012353	0.0180543	0.0148339	0.0186856	0.0152193	0.0108666	0.0175835	0.0141385	0.0161117	0.0188316	0.0101525	0.0122138	0.0114545	0.0135329	0.00966139	0.0111797	0.0162087	0.016057	0.00978114	0.0104405
0.0156291	0.0155237	0.018478	0.0185165	0.0249876	0.0236097	0.0201129	0.0217625	0.0246823	0.026668	0.0176774	0.0195783	0.0186562	0.0192067	0.0202657	0.0222916	0.0214073	0.0210799	0.0207431	0.0174262	0.0278524	0.0265605	0.0202927	0.0226928	0.0239076	0.0254551	0.026539	0.0271781	0.0255743	0.0257584	0.0211308	0.0213123	0.0217918	0.0228834	0.0204288	0.0182781	0.0272663	0.026308	0.0247127	0.0275904	0.0340499	0.0315021	0.021451	0.0217431	0.0216808	0.0201181	0.0225379	0.0194455	0.0192559	0.0156114
0.0179787	0.0195586	0.0197684	0.0205634	0.0228224	0.0249009	0.0210244	0.0223522	0.0213069	0.0240373	0.0175003	0.018555	0.0172415	0.0189265	0.0188014	0.0220122	0.0199844	0.0227669	0.019263	0.0186947	0.0264856	0.0235678	0.0177143	0.0145117	0.0251719	0.0251168	0.0257784	0.0259948	0.0234971	0.0239709	0.0240071	0.0238447	0.0251804	0.0268395	0.0266919	0.0240314	0.0254003	0.0244527	0.0297204	0.0309116	0.0361629	0.0334982	0.02073	0.0206834	0.019345	0.0199551	0.0221937	0.0196724	0.0172654	0.0162818
0.0140318	0.0102451	0.0117282	0.0111994	0.0110338	0.0100113	0.0145701	0.0102693	0.00996056	0.00824951	0.0150223	0.0154167	0.017693	0.0136862	0.0147711	0.0123812	0.0184536	0.0183761	0.016725	0.0163559	0.0208676	0.0206574	0.010622	0.0104363	0.0153349	0.017351	0.016027	0.0170388	0.0193921	0.0163699	0.0184513	0.0244746	0.0219618	0.0283813	0.0222396	0.0163149	0.0273363	0.0233794	0.0246572	0.0297962	0.0184916	0.0192667	0.0195624	0.019817	0.0182588	0.0174962	0.0227688	0.0219841	0.0157832	0.017917
0.00902291	0.00811261	0.00728331	0.00655945	0.00690359	0.00639745	0.00862103	0.00726006	0.00652795	0.00551839	0.0104769	0.0110664	0.0117729	0.0104064	0.0101655	0.00890597	0.0129183	0.0126657	0.00977104	0.0111515	0.0142778	0.0142352	0.00728331	0.00768389	0.0105355	0.0122444	0.0112543	0.0125878	0.0127811	0.012226	0.0121289	0.0155414	0.0153503	0.0181006	0.0127266	0.00939955	0.0173284	0.0150527	0.0173332	0.0206527	0.0115213	0.0129569	0.0124406	0.0127452	0.0109178	0.0113779	0.0162795	0.0149201	0.00934361	0.0102384
0.0144194	0.0130677	0.0158194	0.0164335	0.0217287	0.0202241	0.0186054	0.0192942	0.019304	0.0198652	0.0193832	0.0177293	0.015709	0.0170044	0.0192078	0.0185624	0.0179081	0.0190542	0.0170733	0.0149458	0.0253029	0.0223427	0.0177249	0.0194756	0.022376	0.0207756	0.0214651	0.0228046	0.0194294	0.0225541	0.0190489	0.0189966	0.019449	0.0189917	0.0166396	0.0141915	0.023482	0.0229104	0.0219305	0.0252941	0.0305744	0.0304672	0.0169678	0.0185732	0.0160543	0.0171158	0.0189742	0.0175478	0.0116236	0.0144638
0.0129447	0.0103447	0.0102655	0.00986172	0.0103477	0.00947726	0.0137452	0.011224	0.0100767	0.00806393	0.0154752	0.0139191	0.0162083	0.013578	0.014233	0.0120204	0.0168311	0.0154875	0.0148411	0.0153422	0.0183462	0.0168147	0.0117145	0.011403	0.0138101	0.0163373	0.0161167	0.0168238	0.0199886	0.0184448	0.0198132	0.0219269	0.0210412	0.0219739	0.0169389	0.0104521	0.0232667	0.0183156	0.0205675	0.0237626	0.0160178	0.0149602	0.01794	0.0185661	0.0174771	0.0151273	0.0206237	0.0181901	0.0119756	0.0137194
0.0185083	0.0154184	0.0204081	0.0184727	0.0259163	0.0230774	0.0210945	0.0205833	0.0236683	0.0252529	0.0200164	0.0192498	0.0182218	0.0164486	0.020499	0.0212615	0.0181722	0.020001	0.0217274	0.0171484	0.0266358	0.026373	0.0202329	0.0213443	0.0273637	0.0266969	0.0264182	0.0283783	0.0248733	0.0232092	0.0242323	0.02434	0.0228239	0.0218906	0.0217334	0.0191717	0.0277272	0.0224977	0.0272219	0.0282322	0.0400986	0.0337131	0.0268105	0.0290189	0.0225068	0.0238949	0.0251173	0.0227082	0.0190017	0.0211689
0.0164726	0.0168608	0.0173215	0.0177354	0.0219303	0.0224839	0.017953	0.0199615	0.0210255	0.0235027	0.0152951	0.0156415	0.01459	0.0154877	0.017772	0.0196086	0.0164208	0.021319	0.0169196	0.0145536	0.0297372	0.0253317	0.0155993	0.016365	0.0215839	0.0233117	0.022254	0.0244274	0.0202097	0.0225367	0.0236155	0.0232156	0.0225239	0.0222578	0.0203268	0.018169	0.0217403	0.017959	0.0247225	0.0245171	0.0297626	0.0296306	0.0192665	0.0209679	0.0172936	0.0188107	0.0237517	0.0202447	0.0151038	0.0160498
0.0155095	0.0166653	0.0181499	0.0175133	0.0239627	0.0231432	0.0211417	0.0204986	0.0244485	0.0254139	0.0182213	0.0178158	0.0192496	0.017854	0.0207222	0.0216745	0.0203435	0.024136	0.0183181	0.0170117	0.0244899	0.025984	0.0185264	0.0206613	0.0270497	0.0255367	0.0241294	0.02488	0.0243641	0.0259889	0.0217947	0.0222998	0.0225883	0.0260396	0.022057	0.0176763	0.0281226	0.0297976	0.0258114	0.0282475	0.0327065	0.0318851	0.0233174	0.0229989	0.0234334	0.0249834	0.0252566	0.0217286	0.0215714	0.0222702
0.0143313	0.0140724	0.0150778	0.0158322	0.0230742	0.0225505	0.0178063	0.0184955	0.0216798	0.0219072	0.0175997	0.019245	0.0159991	0.0173077	0.0177681	0.0184499	0.0176322	0.0204128	0.0170841	0.0163418	0.0224256	0.0170001	0.0179476	0.0185951	0.0237255	0.0219867	0.0204007	0.0220525	0.0228545	0.0237454	0.0209411	0.019043	0.021555	0.0198027	0.0176481	0.0146681	0.0239652	0.0217732	0.0252819	0.0267866	0.0371415	0.0323511	0.0172897	0.0176863	0.0184484	0.017522	0.019074	0.0152779	0.016167	0.0154022
0.0115048	0.0101947	0.00953859	0.00911579	0.0100735	0.00876798	0.0125682	0.00928562	0.00930844	0.00737189	0.0144841	0.0139675	0.0150525	0.0128294	0.013473	0.0119212	0.0164028	0.0159357	0.013544	0.014401	0.0182127	0.0165572	0.0110851	0.00994221	0.0143986	0.015356	0.0160834	0.017263	0.0181986	0.017421	0.0183704	0.0229097	0.0230067	0.022742	0.0183692	0.0120125	0.0204107	0.015791	0.0197107	0.0227928	0.0144681	0.0150948	0.0149971	0.0141914	0.014952	0.0140421	0.0190518	0.0170699	0.0108197	0.013951
0.0110393	0.00915542	0.0082945	0.00749474	0.00828227	0.00748081	0.0110884	0.00838137	0.00826746	0.00666318	0.0121772	0.0115217	0.0133775	0.0113495	0.0111648	0.00925376	0.0148187	0.0152343	0.0108649	0.0119673	0.0156769	0.0154581	0.00931383	0.00926666	0.0128193	0.0138447	0.0137981	0.013542	0.0167314	0.0163922	0.0167316	0.0205966	0.0173126	0.0197736	0.0143316	0.0107353	0.0209422	0.0174025	0.0183966	0.0217529	0.0144313	0.0146873	0.0150785	0.0158822	0.0128864	0.0137608	0.018532	0.0181521	0.0109329	0.0124351
0.0139029	0.0135819	0.0151801	0.0160177	0.0229917	0.0220761	0.0202634	0.0208752	0.0221616	0.0231705	0.0184651	0.0183127	0.0172982	0.0185752	0.0178	0.0183239	0.0161195	0.0180109	0.018305	0.0157329	0.0274223	0.0245724	0.0173891	0.0196541	0.0231046	0.0237282	0.0226151	0.0249687	0.0219426	0.022892	0.0241472	0.0231699	0.0222097	0.0242559	0.0177567	0.0168056	0.0217237	0.0224793	0.0240469	0.0254356	0.0304434	0.0268417	0.0217572	0.0205777	0.0203709	0.0182789	0.0213015	0.0185312	0.0156655	0.0154105
0.0162044	0.0153742	0.0165113	0.0174034	0.0213098	0.0225074	0.0185825	0.0207909	0.0207083	0.022421	0.0175199	0.0198325	0.0175676	0.0171828	0.0184168	0.0202931	0.0201376	0.021322	0.0186357	0.0176029	0.0265225	0.026517	0.017028	0.0194074	0.0230533	0.0229231	0.0234373	0.0250048	0.0254008	0.0266843	0.0205188	0.0209729	0.0224669	0.0232453	0.0158341	0.014656	0.0269344	0.0232328	0.0250209	0.0271629	0.0337995	0.0299264	0.0223691	0.0210453	0.0190673	0.0172452	0.0230506	0.0206182	0.0152197	0.0149953
0.0127333	0.0104902	0.0100679	0.00938359	0.00983031	0.00851413	0.0126761	0.0103278	0.00890372	0.00756002	0.0154079	0.0145756	0.0178476	0.0141081	0.0138366	0.0116117	0.018824	0.0195984	0.0138837	0.0157859	0.0186504	0.0191584	0.00978012	0.00912374	0.0141918	0.0152421	0.0153821	0.0166614	0.019666	0.0185916	0.0166918	0.020886	0.0200529	0.0243345	0.0194406	0.0145967	0.0238258	0.0211539	0.0204328	0.0273173	0.0166287	0.0188693	0.0205586	0.0198584	0.0178177	0.0179655	0.0243187	0.0214312	0.0140845	0.0163403
0.0172462	0.0162355	0.0195526	0.0199443	0.0248238	0.0246597	0.021244	0.0237763	0.0250139	0.0249085	0.0196973	0.019755	0.018983	0.0201389	0.0207633	0.0226264	0.0221524	0.0235321	0.021348	0.0207295	0.0305899	0.0278974	0.0197021	0.0236728	0.0267679	0.0272502	0.0274659	0.0271764	0.0229453	0.025025	0.0237713	0.0230225	0.0248417	0.0252304	0.0206467	0.0203765	0.0249194	0.0257741	0.0276145	0.0285995	0.0352362	0.0316443	0.0206552	0.0208851	0.0197612	0.0202197	0.0215383	0.0204031	0.014742	0.0188468
0.0222164	0.0223019	0.0217899	0.0223736	0.0279562	0.0286999	0.0241156	0.0248465	0.0276513	0.025605	0.020185	0.0248255	0.0184989	0.02226	0.0226218	0.0233619	0.0222348	0.0273444	0.0249516	0.0228842	0.0334609	0.0257666	0.0229796	0.0274665	0.029584	0.0327822	0.0281475	0.0296943	0.0256112	0.0268709	0.0294548	0.0287097	0.0290608	0.0304687	0.0273757	0.0258505	0.0276708	0.0289018	0.0302654	0.0318524	0.0398345	0.0384303	0.0284322	0.0284584	0.0260716	0.0250619	0.0295477	0.024877	0.0222103	0.0225183
0.0132275	0.00962391	0.0094868	0.00895284	0.0095547	0.00895795	0.0134729	0.0105671	0.00922297	0.00770899	0.0144488	0.0146113	0.0168192	0.0135937	0.0130894	0.0109856	0.0168345	0.0152683	0.0142246	0.0146225	0.0167859	0.0161402	0.0109556	0.011442	0.01412	0.0153131	0.0147809	0.0151741	0.0182348	0.016633	0.0176655	0.0202229	0.0208066	0.0200334	0.0158693	0.00991641	0.0227091	0.0170984	0.0211966	0.0234646	0.0155274	0.0159779	0.0173017	0.0157834	0.0154891	0.0147424	0.020351	0.0176269	0.0119459	0.0138419
0.00877036	0.00775884	0.00689068	0.00620113	0.00675407	0.00640748	0.00838094	0.00660794	0.00617687	0.00533469	0.0107345	0.0109607	0.0126759	0.00998886	0.0099927	0.00813866	0.0128277	0.0139953	0.00823169	0.00979845	0.0146799	0.014815	0.00736168	0.00805154	0.0111149	0.0125198	0.0117625	0.0134076	0.0139431	0.0122315	0.0124394	0.0166013	0.0147957	0.0177866	0.0133357	0.0101819	0.0206756	0.0168603	0.0177127	0.0223944	0.0137597	0.0141086	0.0130375	0.0136915	0.011451	0.0117068	0.0170348	0.0157447	0.00944905	0.0101862
0.0152897	0.0159451	0.0165901	0.0167797	0.0209914	0.0206896	0.0180496	0.0192956	0.0225873	0.0239845	0.0163519	0.0160811	0.0171528	0.0180899	0.0202598	0.0211963	0.0194048	0.0206137	0.0177418	0.0157528	0.0279072	0.0250169	0.0179821	0.0191228	0.0229537	0.0232847	0.0213368	0.0224498	0.0247689	0.0256853	0.0214415	0.0221081	0.0222099	0.0249451	0.0199093	0.0210091	0.0289764	0.0281784	0.0256654	0.0278532	0.0367878	0.0329375	0.0223954	0.0236804	0.0191774	0.0201986	0.0230721	0.0210168	0.0177551	0.0174296
0.0173827	0.0179287	0.0197745	0.0196497	0.0250903	0.0262208	0.020338	0.0219471	0.0263714	0.0250162	0.0202025	0.0207182	0.0190629	0.0192702	0.0223557	0.0222892	0.0219506	0.0256622	0.0224025	0.019687	0.0269612	0.0258186	0.0210075	0.0231685	0.0272183	0.0264334	0.0264502	0.0286633	0.0251072	0.0265795	0.0215231	0.022122	0.0222464	0.0234699	0.0173084	0.0192976	0.0246171	0.0264173	0.0265475	0.0295192	0.0340427	0.0324097	0.0237561	0.023531	0.021828	0.0197216	0.0240027	0.0214164	0.0189379	0.0185459
0.0133895	0.0132934	0.0146676	0.01624	0.023628	0.0229659	0.0174723	0.0192901	0.0243639	0.0240175	0.0175811	0.017346	0.0187334	0.0173928	0.0171837	0.0167881	0.0201859	0.0229662	0.0168128	0.013164	0.025726	0.0236533	0.015956	0.0204393	0.0195804	0.0232798	0.0228339	0.0253538	0.0243758	0.0260258	0.0196609	0.0213646	0.0203657	0.0204287	0.0145814	0.0125457	0.026535	0.0256864	0.0233029	0.0264016	0.0317867	0.0305284	0.0196621	0.0197944	0.0206132	0.0184167	0.0231442	0.0202637	0.0170512	0.0181274
0.0166836	0.0163295	0.0171449	0.0167431	0.0217487	0.0219186	0.018037	0.020593	0.0208092	0.0212395	0.0181124	0.0216824	0.0155095	0.0180758	0.0168778	0.017984	0.0174867	0.0206815	0.0195704	0.0166676	0.0242102	0.0223745	0.0163325	0.0188174	0.0220579	0.021783	0.0219019	0.0223252	0.0241019	0.0257481	0.0177669	0.0191493	0.0202263	0.0229774	0.0158	0.0150023	0.0215518	0.0224137	0.024705	0.0262678	0.0328133	0.0310519	0.0228129	0.0222957	0.0207023	0.0216659	0.0228587	0.0209244	0.0146693	0.0163312
0.0148225	0.0138029	0.017565	0.0174027	0.0227275	0.0238353	0.0202261	0.0218494	0.0241323	0.0255462	0.0190297	0.0194183	0.019165	0.0184893	0.0193038	0.0202999	0.0201487	0.0222153	0.0209228	0.0184807	0.025451	0.0244269	0.0188953	0.0213415	0.0250489	0.0246607	0.0251948	0.02629	0.0243623	0.0253411	0.0195096	0.0207421	0.0205146	0.0218408	0.017821	0.016821	0.0286329	0.0282282	0.0249136	0.0277753	0.035913	0.0328003	0.0198786	0.0197987	0.0185742	0.0192346	0.021878	0.0204085	0.0153206	0.0170124
0.0178325	0.016015	0.018663	0.0178923	0.0238195	0.0230465	0.0211963	0.021086	0.0247641	0.024683	0.0206376	0.0216076	0.0179769	0.017083	0.0208306	0.0205436	0.0225898	0.02558	0.0192289	0.0176184	0.0285931	0.0256043	0.0197301	0.0221916	0.0248118	0.024034	0.0259976	0.0263066	0.0279749	0.0280821	0.0227566	0.023321	0.0235996	0.0241228	0.0206367	0.0207928	0.0334946	0.0331488	0.0306314	0.03335	0.0442086	0.0388639	0.0199843	0.0197872	0.0171088	0.0181749	0.0228283	0.0195192	0.0165414	0.0166745
0.0152069	0.0132156	0.0177068	0.0175608	0.0230209	0.0223946	0.019468	0.0210741	0.0214445	0.022857	0.0179477	0.0165382	0.0157931	0.0170266	0.0186006	0.0189024	0.0178829	0.0196554	0.0177106	0.0148669	0.0253184	0.0235029	0.0195847	0.0206951	0.0219804	0.0212106	0.0229174	0.0238759	0.0227549	0.0226976	0.0214041	0.0229277	0.0231203	0.0246351	0.0181279	0.0166146	0.0252971	0.02264	0.0261918	0.02523	0.0338254	0.0283916	0.0206648	0.0204273	0.0172647	0.0178389	0.0237991	0.0194568	0.0156165	0.0144997
0.0118718	0.0107423	0.0103202	0.0107288	0.0102153	0.00943322	0.0133917	0.010986	0.0096447	0.00832502	0.0152045	0.0150484	0.0163067	0.0133132	0.0139286	0.0119188	0.0183416	0.0178664	0.0145916	0.0160403	0.0188853	0.0181073	0.0123408	0.0119345	0.0153047	0.0169147	0.0162505	0.0170115	0.0205483	0.018477	0.017252	0.0228576	0.0199258	0.0232063	0.0190229	0.0131648	0.0232039	0.0153365	0.0214226	0.0243119	0.0167704	0.0165032	0.0197679	0.0195967	0.0196445	0.0176392	0.0221951	0.0199205	0.0149496	0.0149394
0.0124417	0.0102384	0.0109879	0.0112849	0.0106146	0.0099665	0.0131598	0.0109226	0.0101738	0.00870981	0.0146154	0.0143114	0.0169598	0.014113	0.0147662	0.0120985	0.0178365	0.01715	0.0157798	0.0163852	0.0188987	0.0189425	0.0130485	0.0130727	0.0150738	0.0174826	0.0165598	0.018107	0.0194495	0.0180075	0.0187962	0.0238034	0.0214494	0.0239831	0.0196755	0.0134343	0.0250049	0.0204838	0.0225397	0.0275174	0.0167199	0.0164561	0.0187067	0.0182622	0.0171111	0.0160412	0.0224059	0.0204825	0.0129326	0.0151035
0.0113711	0.00951089	0.00913903	0.00795345	0.00915226	0.00839609	0.010511	0.00915669	0.00879354	0.0073671	0.0140493	0.0130569	0.0150908	0.0124034	0.0127966	0.0103286	0.0170406	0.0168526	0.0110408	0.0127363	0.0169627	0.0170388	0.00936079	0.0103915	0.013583	0.0155898	0.0148619	0.0158588	0.0175193	0.0153002	0.0161947	0.020975	0.0192381	0.0219257	0.0188242	0.0132736	0.0251636	0.0206882	0.0219241	0.0260879	0.0163442	0.0180543	0.0155735	0.0159247	0.014925	0.0136342	0.0207758	0.0181099	0.0118508	0.0118342
0.0122269	0.011051	0.0102128	0.0091099	0.00995235	0.00913515	0.0130458	0.0106931	0.00910632	0.00789311	0.0140046	0.0142378	0.0156236	0.0128382	0.014324	0.0121611	0.0164892	0.0180192	0.0134101	0.0145507	0.0176325	0.0168819	0.00985055	0.0110315	0.0145312	0.0158509	0.0156131	0.017172	0.0195417	0.0193116	0.0185332	0.0204441	0.0204496	0.0212766	0.0171206	0.0115714	0.0244731	0.0198242	0.0224305	0.0258174	0.0180178	0.0184207	0.016674	0.0161594	0.0148114	0.0149988	0.0200211	0.0171302	0.0119933	0.012921
0.019063	0.0158103	0.0225965	0.0187054	0.0238848	0.0242261	0.0258284	0.0230277	0.0232266	0.0256047	0.017937	0.0208809	0.0192566	0.0182093	0.0190626	0.0189949	0.0193056	0.021147	0.0206717	0.0191441	0.0298066	0.0304699	0.0194277	0.0213078	0.0236762	0.0246608	0.0249517	0.0272492	0.0264741	0.0262417	0.0246966	0.0267849	0.025309	0.030947	0.0258365	0.0261107	0.0274279	0.025295	0.0255696	0.0266713	0.0344963	0.0306457	0.0254968	0.0235677	0.0244895	0.0207187	0.0251052	0.0211716	0.0203595	0.0170804
0.0109328	0.00902607	0.00822056	0.00807959	0.00865813	0.00782085	0.0106239	0.00947279	0.00845992	0.00690334	0.0132213	0.0132099	0.0156899	0.012775	0.0128228	0.0106617	0.0143091	0.0139675	0.0109214	0.0116971	0.0160956	0.0155347	0.00928477	0.00917701	0.0122169	0.0143104	0.0135832	0.014287	0.0172443	0.0169227	0.0158341	0.0185148	0.0177941	0.0189146	0.0159702	0.0110163	0.020777	0.0173579	0.0190332	0.0225645	0.0150913	0.01478	0.0152265	0.0159157	0.0136534	0.0141871	0.0192117	0.0185851	0.010971	0.0133691
0.00864744	0.00704872	0.00659768	0.00680016	0.00680424	0.00604716	0.00762927	0.00546472	0.00568464	0.00494746	0.00940324	0.0090305	0.0105412	0.0086047	0.00914553	0.00736735	0.0122162	0.0118485	0.00743356	0.00919005	0.014608	0.0142807	0.00671034	0.0079127	0.0104307	0.0120708	0.0113615	0.0121529	0.0138516	0.0118856	0.0130153	0.0159457	0.0155785	0.0174541	0.0141532	0.0099945	0.0187859	0.0156625	0.0166939	0.0214212	0.0126304	0.0142114	0.0137596	0.0142919	0.0102828	0.0109245	0.0162209	0.0155648	0.00897687	0.00878048
0.0167581	0.0162987	0.0189089	0.0187126	0.0270168	0.0276809	0.021515	0.0233198	0.0254384	0.0272409	0.0192287	0.0202778	0.0187818	0.0190542	0.0200718	0.0215957	0.0172299	0.0230457	0.019232	0.0189287	0.0259174	0.0250617	0.0191688	0.0225509	0.0266229	0.0275631	0.0248048	0.0273965	0.0232199	0.0244303	0.0236285	0.0246938	0.0249268	0.0272769	0.0218495	0.0216114	0.0222593	0.0243842	0.0282653	0.0309168	0.0329811	0.0321456	0.0239993	0.0241136	0.0193189	0.0196013	0.0260276	0.0241668	0.0171375	0.0185277
0.0131033	0.0123148	0.0138405	0.0139092	0.020453	0.0203813	0.0160161	0.016272	0.0183371	0.0187125	0.0139735	0.0168897	0.0149247	0.0157226	0.0144236	0.0153761	0.0161403	0.0177578	0.0174447	0.0150841	0.0242616	0.0212598	0.0159534	0.0182358	0.0206552	0.0214529	0.0209849	0.0228103	0.0198848	0.0212048	0.0178494	0.0168416	0.0173572	0.0188966	0.0152007	0.0137031	0.0249513	0.0232615	0.0220952	0.0253246	0.0346269	0.0289356	0.018649	0.0194988	0.014906	0.014528	0.0199741	0.0185794	0.0122251	0.0129754
0.018461	0.0173437	0.0192468	0.0178076	0.0231344	0.0249744	0.0215247	0.0224248	0.0242668	0.0258233	0.0176454	0.0185761	0.0165837	0.0187345	0.0203952	0.0211291	0.0213264	0.023475	0.0213533	0.0179914	0.0273251	0.0246503	0.0192097	0.0225606	0.0241814	0.0247858	0.022957	0.0250059	0.0240171	0.025478	0.0225279	0.0232483	0.0239259	0.0247534	0.021575	0.0197724	0.0266509	0.026363	0.0285655	0.0279559	0.0384773	0.0338715	0.022268	0.0234868	0.0211632	0.0206867	0.0260906	0.0213197	0.016288	0.0174938
0.0160648	0.0155183	0.0181815	0.017061	0.023648	0.0227282	0.020029	0.0214517	0.0236484	0.0240547	0.0176028	0.0196864	0.0178062	0.0183125	0.0193715	0.018892	0.0190521	0.0211692	0.0187616	0.0177385	0.0255806	0.0246776	0.0190488	0.0206597	0.0256549	0.023939	0.0242983	0.0254001	0.0220967	0.0238904	0.0200914	0.0207357	0.0215859	0.0219017	0.017561	0.0146245	0.0281029	0.0263258	0.0276604	0.0275684	0.0344946	0.0320261	0.0208141	0.0214504	0.0213109	0.0211245	0.0232783	0.0212104	0.0186643	0.0194082
0.00989985	0.00832373	0.00807928	0.00804014	0.00816279	0.00730207	0.0112504	0.00867756	0.00821773	0.0063982	0.0126664	0.012875	0.0144607	0.010884	0.01189	0.00937658	0.0147697	0.0146262	0.0112594	0.0131425	0.0143923	0.0146004	0.00844956	0.00911469	0.0127254	0.0140551	0.0128471	0.013293	0.015085	0.015162	0.0143495	0.019096	0.0176763	0.020447	0.0143624	0.00936611	0.0183445	0.0139721	0.0152438	0.0181731	0.0107484	0.0125543	0.0160775	0.0159578	0.0136042	0.0141049	0.0190691	0.0166162	0.0109855	0.0115492
0.0111613	0.00962831	0.00843773	0.00936871	0.00759149	0.00713448	0.0108626	0.00850923	0.00707561	0.00594791	0.0133227	0.0134769	0.0151752	0.0119594	0.0129567	0.0106453	0.0154305	0.0158734	0.0109921	0.0125834	0.0171253	0.0173869	0.00879915	0.00955994	0.0130143	0.0159138	0.0131305	0.0149938	0.0169109	0.0159428	0.0153182	0.022137	0.0169347	0.021463	0.0157277	0.0117766	0.0198331	0.0169369	0.0183173	0.0234698	0.014849	0.0160365	0.0134008	0.013925	0.012517	0.0128235	0.0170299	0.015843	0.0090748	0.0106416
0.0177304	0.0156539	0.021884	0.0201661	0.0271615	0.0262497	0.0221545	0.0254188	0.025618	0.027517	0.0227374	0.0219616	0.0213865	0.0228456	0.0213866	0.0235496	0.0239176	0.0259131	0.0237556	0.0197111	0.0304627	0.0325322	0.0220801	0.024117	0.0282924	0.0290802	0.0287693	0.0304131	0.0300154	0.0298849	0.0266583	0.0261445	0.0251776	0.0265539	0.0230091	0.0217914	0.0303542	0.0294148	0.0293296	0.0307379	0.0413706	0.0377995	0.0241084	0.0250836	0.020295	0.022052	0.0247526	0.0223734	0.0163752	0.0173366
0.0118944	0.0126353	0.0132587	0.014289	0.0187599	0.0200164	0.014659	0.0164625	0.0179464	0.0194513	0.0155256	0.0149156	0.0143673	0.0146129	0.0174702	0.0178229	0.0160906	0.0171098	0.0138492	0.0116749	0.0190738	0.0203173	0.0143983	0.0155831	0.0199871	0.019589	0.0188792	0.020918	0.0196467	0.0203934	0.0182181	0.0188016	0.0183794	0.0189951	0.0162039	0.0141181	0.0191296	0.0179015	0.0216025	0.0231712	0.0293206	0.0261164	0.0161459	0.0174433	0.0147549	0.0139045	0.0198501	0.0158237	0.0124073	0.013479
0.0167086	0.0166626	0.0180464	0.0183783	0.0215751	0.0203561	0.0213881	0.0216792	0.0229408	0.023654	0.0168114	0.0168368	0.0194261	0.0188854	0.0195246	0.0193494	0.0149541	0.0174759	0.0163117	0.0167842	0.024303	0.0233643	0.0153862	0.0176166	0.020027	0.0203783	0.0218353	0.0224468	0.0230497	0.0230401	0.0239238	0.0237275	0.0226608	0.024044	0.0215089	0.0203012	0.0226227	0.0216397	0.0255236	0.0252345	0.0350641	0.0292436	0.0246166	0.0226414	0.0224212	0.0209533	0.0241277	0.0215689	0.0183857	0.0187922
0.0186274	0.0170943	0.0205356	0.0197332	0.0247465	0.0247422	0.0233203	0.0243529	0.0238785	0.023624	0.0178823	0.0203408	0.0184121	0.0187884	0.0186881	0.0204567	0.0212639	0.0221412	0.0210298	0.0178556	0.0285871	0.0295379	0.0193569	0.0211737	0.0250589	0.0265098	0.0243116	0.0256843	0.025278	0.0253151	0.0277258	0.0290839	0.0269451	0.0276699	0.0263651	0.0246473	0.0232876	0.0223886	0.034252	0.031582	0.0392679	0.0350373	0.0239514	0.0222977	0.0210424	0.0220645	0.0249427	0.0221585	0.0172674	0.0180019
0.018288	0.0164588	0.013909	0.0145474	0.0148814	0.0147726	0.0200445	0.0165618	0.014013	0.0125872	0.0217434	0.0208118	0.024014	0.0196245	0.0212799	0.0184077	0.0228112	0.021822	0.0199306	0.0187599	0.0239737	0.0228104	0.016515	0.0153832	0.0198663	0.0213824	0.0231923	0.0225123	0.0233311	0.0228918	0.0268907	0.0279316	0.0300674	0.0280079	0.0258645	0.017188	0.0268384	0.0229009	0.0274105	0.0286177	0.0199718	0.0224228	0.0264977	0.0234126	0.0260309	0.0208005	0.0246016	0.0221093	0.0176495	0.0185806
0.0131607	0.0108064	0.00958859	0.00990885	0.00980717	0.00891103	0.0137442	0.0110407	0.00861283	0.00711412	0.0138496	0.0142489	0.0157817	0.0128711	0.0126598	0.0108709	0.0180952	0.0161677	0.0163923	0.0168324	0.017402	0.0169827	0.010656	0.0110809	0.0141827	0.0165178	0.0155839	0.0162854	0.0197221	0.0191585	0.0179883	0.0216679	0.0210211	0.0223353	0.0166095	0.0116254	0.0237893	0.0196051	0.0204465	0.0239141	0.0165804	0.0176915	0.0179781	0.0176963	0.0164169	0.0149177	0.0215752	0.0200125	0.0124768	0.0132139
0.0171057	0.0156354	0.0196887	0.0203131	0.0247815	0.0262897	0.0208071	0.0220205	0.0234563	0.0243486	0.0211945	0.0221247	0.0207884	0.020924	0.0220301	0.0221251	0.0258957	0.0262042	0.0216061	0.0174777	0.0308517	0.0268527	0.0218103	0.0233417	0.0286802	0.0264095	0.0266178	0.0303701	0.0298423	0.0302833	0.0221802	0.0222979	0.0231073	0.02396	0.0190999	0.0172554	0.0297566	0.0289107	0.0282016	0.0299807	0.0386592	0.0355881	0.0252933	0.026186	0.0223051	0.0222039	0.0247112	0.0228459	0.0190646	0.019504
0.016307	0.0164938	0.0186251	0.0183054	0.0244291	0.0246916	0.0207606	0.0220708	0.0250253	0.0273142	0.0196932	0.0182041	0.0195188	0.0191928	0.0218155	0.022401	0.0198807	0.0220854	0.0190911	0.017455	0.0276352	0.0273112	0.0183531	0.0207382	0.0254918	0.0268462	0.024793	0.0260575	0.0259512	0.0259	0.0228136	0.0232292	0.0245072	0.0247165	0.020813	0.0171102	0.029205	0.0278452	0.0281981	0.0288652	0.0395882	0.0359918	0.0208044	0.0226234	0.0199111	0.0210632	0.0227747	0.0207268	0.0159188	0.0182998
0.01092	0.00983043	0.00774541	0.00736255	0.00836418	0.00725525	0.00965789	0.00816691	0.00757144	0.00636688	0.0124018	0.0128445	0.0130845	0.0111134	0.0117964	0.00982286	0.014605	0.0150227	0.0103381	0.0111277	0.0162951	0.016184	0.00780464	0.00891675	0.0119911	0.0134742	0.0125895	0.0142946	0.0159801	0.0155226	0.014648	0.0171055	0.0172193	0.0187048	0.0160599	0.0109473	0.0214061	0.0180663	0.0201996	0.0231983	0.0149039	0.0156719	0.0148142	0.0161769	0.0133495	0.01333	0.0189078	0.0174812	0.0105786	0.0115857
0.0108837	0.00896842	0.00841614	0.00801121	0.00798721	0.00741216	0.0114745	0.0094082	0.00769672	0.00647109	0.0131776	0.0123595	0.0143678	0.0111794	0.0112546	0.00923291	0.0147825	0.014074	0.0110078	0.0124287	0.0162225	0.0161672	0.00856475	0.00925248	0.0120796	0.0138746	0.0137642	0.0141527	0.0171353	0.0154088	0.0159585	0.0197903	0.0194459	0.0206326	0.0173439	0.0118109	0.0229867	0.0176892	0.0207093	0.0232806	0.0143578	0.0156411	0.0174016	0.016026	0.0159794	0.0147284	0.0190023	0.0179106	0.011764	0.0150066
0.0115379	0.00992067	0.00889757	0.00869778	0.00907407	0.00868098	0.0119191	0.0099948	0.00874223	0.00735552	0.014328	0.0135972	0.0154277	0.0124172	0.0132006	0.0114621	0.015118	0.0161442	0.0119864	0.0135056	0.0174595	0.0171599	0.0100118	0.0104661	0.0137267	0.0156709	0.0150527	0.016101	0.0188459	0.0186925	0.0164839	0.0206606	0.0188268	0.0212864	0.0182599	0.0124623	0.0230398	0.0220713	0.021896	0.0254413	0.0148315	0.0164063	0.0147761	0.0143493	0.0141121	0.0149044	0.0192611	0.0172661	0.0128623	0.0135839
0.017286	0.0158241	0.0178455	0.0181416	0.0233942	0.0244358	0.0221075	0.0223544	0.0244019	0.0227065	0.0172591	0.0173457	0.0191346	0.0175928	0.0195403	0.0206565	0.0230416	0.0268209	0.0181054	0.016293	0.0324317	0.0305823	0.0183743	0.0222317	0.0276261	0.0271236	0.0272349	0.0289194	0.0270259	0.0279183	0.0256492	0.0263083	0.0243273	0.0257487	0.0215294	0.0230855	0.029154	0.027646	0.0294406	0.0298594	0.0357391	0.0347134	0.0249686	0.0254272	0.0214245	0.0225184	0.0257256	0.0235082	0.0159397	0.0181709
0.0158348	0.0170673	0.0172625	0.0174138	0.0252101	0.0241205	0.0175502	0.0187106	0.0225986	0.0233047	0.016407	0.0158908	0.013972	0.014773	0.0174508	0.0182941	0.0168748	0.0192241	0.0163626	0.0157414	0.0278209	0.0229523	0.0175715	0.016864	0.0226738	0.0236485	0.0258968	0.0264572	0.021211	0.0226833	0.0221214	0.0205305	0.0190821	0.0204928	0.0176036	0.0154398	0.0243866	0.0227109	0.0235116	0.0265178	0.0354719	0.0331348	0.0164282	0.0179292	0.0154894	0.0172544	0.0194611	0.0177342	0.0143882	0.0161705
0.0178325	0.0170342	0.0182878	0.0182088	0.0250995	0.0253965	0.0216687	0.0234173	0.0275517	0.0257207	0.0193206	0.0200872	0.0206794	0.0187519	0.0219641	0.0228348	0.019881	0.0218164	0.0193815	0.0179905	0.0264309	0.0238895	0.021291	0.0240619	0.0293707	0.0273896	0.0254011	0.0257367	0.0237015	0.0242779	0.02388	0.023468	0.0234989	0.0246186	0.0222437	0.0193365	0.0271785	0.024592	0.027915	0.0286021	0.0371105	0.0336514	0.0274929	0.0284577	0.0236653	0.0229428	0.0276455	0.0232542	0.0190616	0.0199126
0.00833294	0.00792771	0.00580567	0.00667853	0.00650249	0.00578363	0.00631361	0.00589311	0.00576528	0.00520834	0.0094328	0.009347	0.0100139	0.00906599	0.00851878	0.00801713	0.0121309	0.0130703	0.00888259	0.0115795	0.0129421	0.0145129	0.00705435	0.00772739	0.0099704	0.0115768	0.00942367	0.011906	0.0102328	0.0119307	0.0103373	0.0161796	0.0133517	0.0184514	0.0140787	0.0107157	0.0172812	0.014905	0.0177514	0.0220053	0.0133253	0.0142275	0.0136222	0.0140853	0.0123886	0.0125668	0.0174007	0.0164606	0.00993735	0.0104328
0.0134285	0.0137028	0.0144301	0.0156702	0.0224745	0.0206769	0.0151995	0.0163113	0.0217012	0.0211425	0.0140842	0.0157268	0.0149168	0.0154645	0.0182962	0.0191181	0.0151879	0.0178952	0.0164742	0.0152661	0.0264739	0.0235044	0.0171426	0.0182171	0.0217278	0.0213552	0.0213757	0.02201	0.0229729	0.0234075	0.0209795	0.020175	0.0181634	0.0194913	0.0164234	0.0148086	0.0275178	0.0257278	0.0240841	0.0261954	0.0354945	0.0325499	0.0141054	0.0157701	0.014583	0.0156446	0.0178485	0.0154199	0.0125483	0.0157145
0.0125487	0.0107332	0.00946017	0.00908664	0.00951185	0.00837578	0.0123157	0.00898673	0.00876035	0.00724178	0.0123944	0.0121843	0.014719	0.0127614	0.0132218	0.0117799	0.0155355	0.0154091	0.0119469	0.0139422	0.0185145	0.0185382	0.0096883	0.0100948	0.0137455	0.0147745	0.0152947	0.0161534	0.0169939	0.0176739	0.0164465	0.0211895	0.0206785	0.0218138	0.016888	0.0119301	0.0219989	0.0179063	0.0204653	0.024925	0.013925	0.0159317	0.0145861	0.0152771	0.0135698	0.0147884	0.0191404	0.017645	0.0113269	0.0130722
0.0168328	0.0146466	0.0109779	0.0106556	0.0109221	0.00953461	0.014788	0.0111965	0.0102298	0.00899342	0.0168298	0.0160543	0.0187836	0.0142233	0.0144006	0.0115235	0.0180987	0.0186731	0.0135595	0.0148729	0.0195251	0.0206997	0.0108199	0.011739	0.0155068	0.0174458	0.0170818	0.0184778	0.0189156	0.018996	0.0188152	0.0230905	0.023807	0.0256552	0.021363	0.0151238	0.0257486	0.0201825	0.0238645	0.0270081	0.0195358	0.0196504	0.0216551	0.0201411	0.0188428	0.0191654	0.0245708	0.0213846	0.0165366	0.0167344
0.0143342	0.0126997	0.013964	0.015086	0.0200414	0.0197321	0.0173739	0.0180936	0.0189629	0.0197358	0.0144022	0.0163332	0.0150465	0.0142112	0.0162358	0.0163902	0.0154085	0.0199119	0.0156451	0.0140387	0.0205099	0.0182566	0.0152576	0.0187436	0.0191745	0.0196632	0.0205872	0.0214234	0.0189949	0.0205098	0.0188484	0.0179743	0.0196633	0.0196309	0.017794	0.0163682	0.0226005	0.0205292	0.0253785	0.0263707	0.0330188	0.0294106	0.0204811	0.0208968	0.0201087	0.0182277	0.0212924	0.0190105	0.0185233	0.0165805
0.016241	0.0164882	0.0188458	0.0179437	0.0215266	0.0212162	0.0202131	0.0206934	0.0222784	0.0227743	0.0185342	0.0182498	0.0169042	0.0176628	0.020622	0.0192387	0.020238	0.022523	0.0186085	0.0158779	0.0247055	0.0213375	0.0182307	0.0188344	0.0236451	0.0231016	0.021092	0.0216826	0.0237488	0.0239628	0.0216437	0.0214978	0.0227188	0.0233619	0.0163573	0.0142083	0.0275419	0.0274169	0.0258371	0.0265467	0.0327858	0.0296577	0.0213321	0.021036	0.0193342	0.019263	0.0252263	0.0213494	0.0168731	0.0173938
0.00962162	0.00756517	0.00670342	0.00535649	0.0068033	0.00564661	0.0069301	0.00514755	0.00621575	0.0043842	0.0102152	0.00959625	0.0101465	0.00905457	0.00933629	0.00662179	0.0117379	0.0119512	0.00901062	0.00995451	0.0144065	0.0132863	0.00636625	0.00619828	0.0103826	0.0109366	0.0108541	0.0117397	0.0123937	0.0114297	0.0112862	0.0152203	0.0145321	0.0172126	0.0123328	0.010069	0.0169938	0.0122341	0.0164606	0.0207827	0.0125117	0.0121218	0.0117421	0.0140921	0.0108674	0.0112214	0.0170249	0.0162208	0.00954939	0.00989324
0.0103648	0.00860109	0.00815048	0.00787754	0.00817214	0.0075743	0.0105326	0.00840517	0.00798018	0.00662179	0.0124358	0.0122978	0.0145861	0.0117555	0.0121996	0.0104676	0.0142377	0.01375	0.0116251	0.0118951	0.0142583	0.0145693	0.00914268	0.00935274	0.0120321	0.0143731	0.0136906	0.0142725	0.0166593	0.0161318	0.0149529	0.0178074	0.0170771	0.0191006	0.0167765	0.0107614	0.0209995	0.0178248	0.0172483	0.0220201	0.014285	0.0152649	0.0160997	0.0153791	0.0139706	0.0139555	0.0187449	0.0159903	0.0110105	0.0111561
0.0152133	0.0141022	0.0170221	0.0164087	0.0213592	0.0198969	0.0188183	0.0193677	0.0196052	0.0201268	0.0146245	0.0163588	0.0147489	0.0162619	0.0176326	0.0190053	0.0167298	0.0181097	0.0172828	0.0141156	0.026512	0.0234233	0.0164578	0.0177568	0.0216846	0.0220244	0.0221674	0.0216186	0.0214704	0.0217913	0.021995	0.0210724	0.0202317	0.020906	0.0161576	0.0156281	0.0247448	0.0231962	0.0243963	0.0268572	0.0355085	0.0309204	0.0197306	0.0208087	0.0167613	0.0175783	0.0219104	0.0191699	0.0150606	0.0148423
0.0132109	0.012269	0.0153749	0.0146941	0.0210763	0.0204519	0.0166885	0.01755	0.0198397	0.0203227	0.0161137	0.0161642	0.015618	0.0160167	0.0166429	0.0183687	0.0170887	0.0193143	0.0175718	0.0146911	0.0195226	0.0205869	0.0157565	0.0179403	0.0210976	0.0212928	0.0195767	0.0229614	0.0176816	0.0208801	0.0174328	0.0179256	0.0185896	0.0193177	0.0141982	0.012064	0.0166915	0.0177839	0.0187514	0.0227647	0.0231381	0.0240612	0.021421	0.0206201	0.0173404	0.0175063	0.0217565	0.0192709	0.0156685	0.0164565
0.0102083	0.00855435	0.00675112	0.00664658	0.00742392	0.00699516	0.00884402	0.0080217	0.0075463	0.00628004	0.0119026	0.0120656	0.0126702	0.0110317	0.010737	0.00977206	0.0155058	0.0143951	0.0107447	0.0115356	0.0144814	0.0154004	0.00762071	0.0085377	0.0116771	0.0131755	0.0117774	0.0136213	0.0146207	0.0142374	0.0121027	0.0162325	0.0164338	0.0205688	0.0158223	0.0107405	0.0193222	0.0156452	0.0182074	0.0232815	0.0127313	0.0150667	0.0146522	0.01517	0.0132493	0.0137739	0.0189922	0.016677	0.0110455	0.0129104
0.0181847	0.0172088	0.0180901	0.0189535	0.0271444	0.0250875	0.023952	0.0244424	0.0258352	0.0259629	0.0186709	0.0191707	0.0193408	0.0194975	0.0204804	0.0206951	0.0193798	0.0221596	0.0189938	0.0189831	0.0308407	0.02917	0.0189553	0.0216637	0.0273713	0.027512	0.0240333	0.0261746	0.0234651	0.0261861	0.025486	0.024675	0.0267379	0.0271034	0.0211947	0.0177581	0.0266044	0.0250827	0.026509	0.026665	0.0354262	0.0320548	0.0221268	0.0227068	0.02061	0.0206875	0.0255263	0.0208238	0.0196741	0.0185309
0.0129357	0.0117357	0.0148471	0.0148484	0.0202337	0.0187324	0.0150597	0.0160127	0.0196675	0.0189898	0.0146203	0.0137851	0.0140337	0.0140193	0.0153387	0.0171405	0.0163475	0.0183456	0.0141489	0.0113872	0.0205477	0.0168528	0.0141315	0.0151846	0.0192653	0.017808	0.0197319	0.0185456	0.0197007	0.0197567	0.0183655	0.0185283	0.0185583	0.0188801	0.0154896	0.0132335	0.0226149	0.0214048	0.0237846	0.0243734	0.0307119	0.0262341	0.014133	0.0164852	0.0146389	0.0141218	0.0188515	0.0157229	0.0118864	0.0156394
0.0184084	0.0170203	0.0213826	0.0197989	0.0267694	0.0246268	0.0231674	0.0246857	0.0261812	0.0276013	0.0196546	0.022775	0.0200949	0.021193	0.0229421	0.0244831	0.0215214	0.0254651	0.021874	0.0212735	0.0272829	0.0266396	0.0211505	0.025187	0.0283285	0.0259839	0.0272417	0.0270174	0.0283045	0.0285911	0.0247961	0.0252019	0.0271055	0.0286189	0.0217841	0.0204291	0.0245239	0.0244427	0.0282125	0.0291422	0.0353892	0.0333016	0.0254855	0.0247335	0.0261169	0.0247476	0.0243807	0.0223046	0.0204127	0.020361
0.0203096	0.018207	0.0207295	0.019841	0.0254525	0.025173	0.0222553	0.0244665	0.0259974	0.0271673	0.0197492	0.0203679	0.0206561	0.020205	0.0212711	0.0205377	0.0217872	0.0245638	0.0227111	0.0221317	0.0317861	0.0280262	0.0212187	0.0235718	0.0308082	0.0284628	0.0278798	0.0292424	0.027586	0.0279323	0.0259028	0.0262447	0.0273872	0.0294084	0.0235369	0.0197283	0.0308446	0.0288585	0.0289783	0.0299875	0.0386859	0.0367875	0.0261608	0.0234617	0.0279525	0.0255033	0.0275334	0.022404	0.0233104	0.0204813
0.0170383	0.0172867	0.0189203	0.0190881	0.0248999	0.0244841	0.0204776	0.0215172	0.0252979	0.0246683	0.0199628	0.0202864	0.0181912	0.0177739	0.0212318	0.0208407	0.020553	0.0232441	0.021361	0.0193951	0.0281489	0.0263801	0.0197056	0.0233151	0.0265965	0.0276421	0.0246894	0.0268599	0.0233058	0.0254988	0.025423	0.0235492	0.0257259	0.0258731	0.0226191	0.0205685	0.0236677	0.0214113	0.0258323	0.0272847	0.0327089	0.0307974	0.025566	0.0257212	0.0226008	0.022079	0.0256397	0.0229452	0.0209239	0.0220315
0.0154969	0.0164808	0.0178215	0.0176834	0.0234638	0.0235798	0.0201243	0.0205063	0.0213901	0.0205582	0.0187161	0.016013	0.0180993	0.0167454	0.0191342	0.01999	0.0182304	0.021964	0.0170722	0.016651	0.0257302	0.0223674	0.0185865	0.0202788	0.0243363	0.0227181	0.0251811	0.0264539	0.0229168	0.0224136	0.0205602	0.0209333	0.0232031	0.0230522	0.021582	0.0197353	0.0301032	0.0292076	0.0270748	0.0274285	0.037914	0.0321328	0.0181091	0.0195472	0.0165994	0.0168122	0.023429	0.0216142	0.0142797	0.016355
0.0145408	0.014777	0.0166151	0.0168066	0.0216314	0.0211058	0.0177385	0.0197611	0.0212229	0.0214293	0.0147297	0.0167706	0.0156247	0.014462	0.0161224	0.0177465	0.0191371	0.0219578	0.0173323	0.0154013	0.0270982	0.0259032	0.017062	0.0180468	0.0217586	0.0210846	0.0223499	0.023534	0.0230576	0.0237226	0.0192938	0.0189061	0.0189275	0.0220827	0.0197341	0.015932	0.0275152	0.0257586	0.0242124	0.0260504	0.0370906	0.0319898	0.0133898	0.0154098	0.0157203	0.0154627	0.0179333	0.016906	0.0124518	0.0133884
0.0129307	0.0110206	0.00888277	0.00972303	0.00997549	0.00931867	0.0127122	0.0107895	0.00941944	0.00736324	0.0146396	0.0151714	0.0166768	0.0148526	0.0137109	0.0120542	0.0165067	0.0170424	0.0144309	0.0143906	0.0188515	0.0193481	0.0112556	0.0114442	0.015778	0.0182785	0.0158012	0.0163317	0.018994	0.0186069	0.0187167	0.0233152	0.0214915	0.0234973	0.0180704	0.0118361	0.0228849	0.0187922	0.020659	0.024436	0.0164915	0.01675	0.0192483	0.0199051	0.0165417	0.0157747	0.0216433	0.019801	0.0112404	0.0128338
0.0154365	0.0148876	0.017054	0.0170429	0.0223299	0.0215571	0.0185277	0.0193961	0.0231966	0.0219852	0.018284	0.0203224	0.0173597	0.0168464	0.0190979	0.0188546	0.0200597	0.0224097	0.0186971	0.0175481	0.0260626	0.0242999	0.0181312	0.0198304	0.024071	0.021693	0.0207903	0.0228509	0.0240163	0.0245411	0.0210831	0.0202733	0.021658	0.0229822	0.0162381	0.0148824	0.0279728	0.027552	0.0268069	0.0268182	0.0359694	0.031943	0.0220963	0.0221924	0.0198111	0.0202007	0.0227385	0.0197686	0.0165497	0.016706
0.0167409	0.0150704	0.01826	0.0186619	0.021054	0.0219804	0.0192993	0.0209898	0.0235921	0.0231925	0.0187316	0.0203274	0.0197039	0.0189081	0.0200921	0.0189813	0.0203147	0.0228995	0.022027	0.0186172	0.0268748	0.0266792	0.0195327	0.0226286	0.0251151	0.024033	0.0239559	0.0238478	0.0248162	0.0254583	0.0215891	0.0211294	0.0218805	0.0219591	0.0167057	0.0151221	0.0282142	0.0262977	0.0246035	0.0264413	0.0340598	0.0290883	0.0223343	0.0214298	0.0215169	0.0184714	0.0249326	0.0209644	0.0180792	0.0184155
0.0136551	0.0135046	0.0164072	0.0163254	0.0200766	0.0209015	0.0173844	0.0180867	0.0203757	0.0213252	0.0165217	0.0172349	0.0154991	0.0151646	0.0156577	0.0160569	0.0156855	0.0205295	0.0149006	0.0126579	0.0222621	0.0166085	0.0178575	0.0196426	0.0215067	0.0207901	0.0200372	0.0210565	0.0225759	0.0227616	0.0201188	0.0201274	0.0185886	0.0188992	0.0177222	0.0155204	0.0237253	0.0212577	0.0236985	0.0244441	0.0345065	0.0301748	0.0140524	0.0125669	0.0121398	0.0111277	0.0172132	0.0139762	0.0119402	0.0111571
0.0142432	0.0126589	0.0158044	0.0154296	0.0202543	0.017894	0.0181716	0.0199278	0.0198662	0.0200171	0.0164603	0.0160416	0.0162388	0.0172311	0.0164554	0.0174104	0.0183	0.0191365	0.0158772	0.0146859	0.025422	0.0212165	0.0165492	0.0183777	0.0190947	0.0174883	0.0207448	0.0202636	0.0205753	0.022493	0.0190745	0.018421	0.0198428	0.0206815	0.016388	0.0142239	0.024213	0.0232965	0.0220236	0.0235063	0.0324368	0.0298782	0.0158793	0.0184824	0.0165552	0.0158769	0.0186679	0.0168685	0.0136454	0.0143829
0.0125667	0.0106001	0.00913466	0.0091397	0.00889891	0.00803958	0.0116552	0.00912404	0.00844692	0.00679922	0.0142892	0.0131113	0.0150564	0.0117203	0.0123485	0.00973567	0.0149565	0.0157843	0.0126889	0.0151794	0.0157416	0.0170723	0.00989535	0.00989799	0.0131053	0.0141513	0.0136775	0.0155194	0.0157269	0.0149326	0.0146574	0.0196048	0.017586	0.0204463	0.0162941	0.0115408	0.0223669	0.016825	0.0177298	0.0234219	0.0139529	0.0144041	0.0154673	0.0150599	0.0145668	0.0152165	0.0201956	0.0177299	0.0127942	0.0126182
0.0148615	0.0142885	0.0161652	0.0167772	0.0223843	0.0214832	0.018564	0.0191634	0.0223095	0.0238091	0.0161779	0.0166034	0.0181817	0.0178674	0.0194023	0.0194517	0.0194825	0.0200706	0.0194069	0.0178499	0.020324	0.0236304	0.0171182	0.0201511	0.0240281	0.0222676	0.0214782	0.0219472	0.0221887	0.0209246	0.0177221	0.0181372	0.0196583	0.0199753	0.0149796	0.0139765	0.0251691	0.0209208	0.0236337	0.0235672	0.0295305	0.0242827	0.0206281	0.0208608	0.0184315	0.0180945	0.0239014	0.0209421	0.0141483	0.0145374
0.00801442	0.00739835	0.00573954	0.00514498	0.0058655	0.00511842	0.00709462	0.00593774	0.00547023	0.00453049	0.00894146	0.00989306	0.0102739	0.00814241	0.00762909	0.00613208	0.0106898	0.011831	0.00783464	0.00945817	0.0109521	0.0110234	0.00605979	0.00622961	0.00930511	0.0100451	0.00897414	0.00998401	0.0110539	0.0111676	0.0100843	0.0138872	0.0138918	0.0157841	0.0120783	0.00867499	0.0151829	0.0119982	0.0134366	0.0165368	0.00982123	0.0104169	0.00954776	0.00975468	0.00839627	0.0087925	0.0141614	0.0114678	0.00704904	0.00771648
0.0139068	0.0117583	0.0111129	0.0105775	0.010906	0.0100466	0.0140196	0.0115524	0.0098255	0.00833527	0.0155738	0.0155705	0.0175766	0.0136814	0.0156294	0.0133	0.0179672	0.0175617	0.0148353	0.0180176	0.0195389	0.0194987	0.0121046	0.0126026	0.0163164	0.0192024	0.0170037	0.0176567	0.0210864	0.0190659	0.0200061	0.0248606	0.0224813	0.024277	0.0192076	0.012969	0.0272091	0.0204776	0.0240874	0.0265582	0.0186097	0.0189691	0.0206484	0.0176949	0.0180924	0.016092	0.0228119	0.0192532	0.013884	0.0133188
0.0107758	0.00803631	0.00765302	0.00763653	0.00817762	0.00733148	0.00955795	0.00758473	0.00759987	0.00637939	0.0121519	0.0118429	0.0138255	0.0108421	0.0115986	0.0095524	0.0134136	0.0139302	0.0102749	0.0123276	0.0154845	0.0159673	0.00866711	0.00948481	0.0123078	0.0138942	0.0134484	0.0141164	0.0138625	0.012527	0.012586	0.0170577	0.0165606	0.0204558	0.0155338	0.0119774	0.0175821	0.0142615	0.0151799	0.0203655	0.011781	0.0128403	0.0126204	0.0136542	0.0111964	0.0116014	0.0160366	0.0157007	0.00863234	0.0103313
0.0168959	0.015684	0.0175256	0.0191488	0.022612	0.0211751	0.0201861	0.0219286	0.0236354	0.0243438	0.0183986	0.0195846	0.0172643	0.0188194	0.0203275	0.0194663	0.0190293	0.0207964	0.0191124	0.0179712	0.0263175	0.0275675	0.0176572	0.0211037	0.0238319	0.0244593	0.0245586	0.0241428	0.0237336	0.0247767	0.0226684	0.0212883	0.0222491	0.0243887	0.017013	0.0164384	0.0222398	0.02338	0.0248149	0.0271412	0.0336337	0.0307401	0.0193477	0.0198689	0.0189811	0.0187625	0.0223723	0.0207926	0.014807	0.0157177
0.0137898	0.0135532	0.0102005	0.0100213	0.0103755	0.00929476	0.0124664	0.0106905	0.0100056	0.00778397	0.0129844	0.01574	0.0148831	0.0131464	0.014263	0.0111154	0.0181285	0.0172189	0.013533	0.0156979	0.019002	0.0202303	0.0102971	0.0110391	0.0149353	0.0166872	0.015377	0.0165821	0.0182241	0.0167035	0.0183595	0.0225594	0.0228004	0.0232023	0.0198392	0.0144656	0.0260291	0.0205983	0.0244956	0.0287125	0.0174136	0.0197221	0.0201003	0.0199933	0.0178778	0.0167121	0.0241239	0.0206805	0.014922	0.0145559
0.00961668	0.00786271	0.00782307	0.00733627	0.00786215	0.00686648	0.00979256	0.00794629	0.00735726	0.00607133	0.0131524	0.0131397	0.0140203	0.0121594	0.0123522	0.0100808	0.0159845	0.0149326	0.0106839	0.0128868	0.0153338	0.0158932	0.00828755	0.0101306	0.0128817	0.0142591	0.0130685	0.0146568	0.0166337	0.0169474	0.0141401	0.0181527	0.0158692	0.0202237	0.0167366	0.0114947	0.0214827	0.0176941	0.0182364	0.0240739	0.0145566	0.0154245	0.0144839	0.0156708	0.0139657	0.0128942	0.018086	0.0168874	0.0103038	0.0117048
0.017759	0.0172774	0.0194601	0.0203375	0.0270131	0.0282078	0.0217669	0.022465	0.0259163	0.0268879	0.0168972	0.0183784	0.0191167	0.0190667	0.0209366	0.0228713	0.0213874	0.0213472	0.0202236	0.0187756	0.0264452	0.0270258	0.0215862	0.0245596	0.0256532	0.026956	0.026361	0.0283016	0.0259412	0.026706	0.0265344	0.0261942	0.0248018	0.024293	0.024457	0.0255318	0.0286241	0.0232938	0.0273974	0.0304359	0.0361635	0.0337302	0.0277637	0.0253936	0.0210692	0.0198552	0.0287617	0.0226282	0.0188852	0.0179111
0.0182233	0.0145193	0.0189105	0.0198687	0.0248934	0.0239831	0.0199348	0.0212495	0.0218051	0.0242928	0.0188051	0.0186407	0.017664	0.0177274	0.0209902	0.0212395	0.0198995	0.0232071	0.0198359	0.0167766	0.0276181	0.0234535	0.0183717	0.0201688	0.0236927	0.0224762	0.0246084	0.0253604	0.0251034	0.0265669	0.0229237	0.023235	0.0221585	0.023105	0.0178852	0.0172235	0.0264487	0.027461	0.0246655	0.0276493	0.0343114	0.0308195	0.0210148	0.0216998	0.018408	0.019532	0.0237297	0.0209353	0.0182453	0.019441
0.017314	0.0160414	0.0199196	0.0182282	0.0252256	0.0251143	0.0210845	0.0234245	0.0256452	0.0268392	0.0214586	0.0190716	0.0193843	0.0191092	0.0216382	0.0218854	0.0219769	0.0249809	0.0200974	0.0191155	0.0277073	0.0265971	0.0198443	0.0224166	0.0275967	0.026546	0.0257725	0.0282612	0.0251398	0.0249039	0.0237155	0.0222381	0.0235131	0.026071	0.0251799	0.0244862	0.0295551	0.0262434	0.0275293	0.0281113	0.0364489	0.030569	0.0224894	0.0227855	0.0176676	0.0214148	0.0235206	0.022459	0.0176634	0.0188953
0.0111908	0.00948324	0.00806899	0.00759434	0.00872507	0.00743785	0.00950449	0.00758305	0.00825904	0.0065655	0.0123079	0.0120184	0.0135953	0.0111552	0.0114588	0.00966217	0.0146838	0.0151919	0.0109732	0.0124622	0.0167517	0.0171016	0.00860299	0.00945237	0.0128949	0.0145187	0.0137639	0.0143521	0.0153932	0.0144156	0.0138898	0.0190177	0.0185921	0.0197734	0.0168698	0.0127246	0.0231057	0.0160291	0.0210053	0.0244996	0.0149449	0.015324	0.0187798	0.018522	0.0158954	0.0154216	0.0214818	0.01852	0.0121537	0.0116723
0.0216619	0.022355	0.0220109	0.0207758	0.0245794	0.0245375	0.0237128	0.0254827	0.0248648	0.0260469	0.021862	0.0232058	0.0212936	0.0223599	0.0221224	0.023806	0.0229239	0.0281761	0.0230234	0.0221934	0.0351601	0.0323	0.0215774	0.0230574	0.0257387	0.026289	0.0283673	0.0292467	0.0275248	0.0288884	0.0257097	0.0250329	0.0280185	0.0315937	0.0274455	0.0226066	0.0263224	0.0277717	0.0299759	0.0303931	0.0384214	0.0345191	0.0253144	0.0253547	0.023523	0.0227801	0.0274021	0.0228195	0.0205105	0.0214236
0.0189859	0.0180171	0.0207792	0.0194431	0.0259227	0.0260413	0.0217036	0.0236834	0.0271993	0.0267319	0.0199318	0.0207002	0.0207209	0.0214057	0.0248131	0.0244248	0.0226745	0.0240095	0.0221309	0.0196346	0.0283895	0.0266575	0.020877	0.0243553	0.0264498	0.0262657	0.0267741	0.0269316	0.0263326	0.0280639	0.0266189	0.0266216	0.0246905	0.0268551	0.0196178	0.0177724	0.0277054	0.0262551	0.02833	0.0288256	0.0346076	0.0313626	0.027812	0.0282205	0.0225916	0.0234975	0.0252925	0.0240744	0.0191543	0.0180977
0.0210987	0.0195765	0.0223687	0.0215833	0.0257307	0.0253092	0.0233498	0.026347	0.026502	0.0284304	0.0191215	0.0220661	0.0190934	0.0210604	0.021747	0.0223415	0.0236436	0.0263358	0.0241344	0.0217915	0.0320804	0.0301885	0.0220976	0.0233976	0.0270875	0.0268736	0.0266376	0.027089	0.0259814	0.0259163	0.0291455	0.0276381	0.0278777	0.0305978	0.0279563	0.0287431	0.025545	0.0189569	0.0296408	0.0298185	0.0349407	0.0290678	0.0252376	0.0262896	0.0243327	0.0213737	0.0274842	0.0249549	0.0203747	0.0222581
0.009753	0.00784503	0.00660983	0.00547202	0.00682978	0.00588287	0.0075122	0.00584081	0.00640237	0.00535341	0.0112855	0.0111772	0.012349	0.0090669	0.0100838	0.00759137	0.0139923	0.0133948	0.00920933	0.0105292	0.0146611	0.0153782	0.00825007	0.00843337	0.0110167	0.0123087	0.0115704	0.0116831	0.0141026	0.0125076	0.0132554	0.0169291	0.0161674	0.0193715	0.0139546	0.0103357	0.0190593	0.0159371	0.0189513	0.0237808	0.0140608	0.0145014	0.0133768	0.0149657	0.0114657	0.0121472	0.0185224	0.0174262	0.00990231	0.010311
0.0108302	0.00915991	0.00826205	0.00849612	0.00913284	0.00806467	0.0108832	0.00871213	0.00819294	0.0062603	0.0135855	0.0131404	0.0151026	0.0120158	0.0134201	0.0109875	0.0155195	0.0166419	0.012803	0.0134958	0.0177283	0.0173768	0.0092377	0.0103022	0.0139842	0.0160247	0.0157164	0.0169993	0.0191373	0.0172618	0.0169689	0.0218689	0.0190919	0.0221934	0.0177882	0.0129882	0.023424	0.019437	0.0209792	0.0257557	0.0159013	0.0171967	0.016689	0.0163902	0.0132951	0.0141939	0.0197376	0.0175748	0.0112171	0.0125896
0.0172158	0.0179293	0.0178541	0.0160025	0.0229934	0.0218521	0.0196804	0.0184828	0.0220956	0.0204011	0.0197355	0.0194729	0.0185356	0.0169326	0.0186704	0.0173428	0.0225966	0.0234301	0.019166	0.0166085	0.0282801	0.0248604	0.0176765	0.0181486	0.0211817	0.0212232	0.023398	0.0229275	0.0247556	0.0229516	0.0231105	0.0215049	0.0250296	0.0244132	0.0229721	0.0208849	0.0231716	0.0227106	0.0275358	0.0262815	0.0343698	0.030521	0.0260712	0.0254661	0.0212023	0.0203962	0.0286112	0.0238458	0.016291	0.0175704
0.0101704	0.00836596	0.00864805	0.00736803	0.00780798	0.00667997	0.00999558	0.00808402	0.00739362	0.00594435	0.010453	0.0110479	0.0135662	0.0103295	0.0108139	0.00888868	0.0139412	0.0140823	0.0108392	0.0132297	0.0159226	0.0164038	0.00859956	0.00929355	0.0127595	0.0141893	0.0127501	0.0137471	0.0149996	0.0126973	0.0118864	0.0192893	0.0179189	0.021655	0.0142879	0.0120286	0.0205173	0.0141954	0.0200379	0.0239436	0.0113101	0.0128222	0.0129352	0.0140975	0.0120131	0.0121407	0.0171519	0.0159448	0.00962391	0.0101809
0.0178313	0.0153708	0.017211	0.0173593	0.0194361	0.0196837	0.0185004	0.0199213	0.0204596	0.0222274	0.0198501	0.0198094	0.0185646	0.0177617	0.0191665	0.0204197	0.0205677	0.021775	0.0206803	0.0184008	0.0243499	0.0221612	0.0174505	0.0195629	0.0206863	0.0216374	0.0218415	0.0218086	0.0248558	0.0233958	0.0192165	0.0173281	0.0202465	0.0200565	0.0179635	0.0141367	0.0244443	0.023151	0.0216115	0.0233906	0.0325502	0.0264105	0.0211688	0.0208828	0.0189158	0.01816	0.0213273	0.0199208	0.0152822	0.0156342
0.0145314	0.0152769	0.0159702	0.0161998	0.0207917	0.0208025	0.0175009	0.0189128	0.0208361	0.020955	0.0132522	0.0151484	0.0161812	0.0187382	0.0198392	0.0203812	0.0164998	0.0184834	0.0145407	0.0121182	0.0248179	0.0187981	0.0145213	0.0152924	0.0212882	0.0206688	0.0220678	0.0243893	0.018623	0.0208144	0.0209848	0.0192238	0.0208327	0.0214931	0.0236047	0.0224011	0.0202147	0.0219355	0.0202521	0.0253442	0.0315751	0.0308378	0.0204334	0.0226009	0.0192851	0.0176463	0.0222396	0.0201108	0.0184808	0.0175264
0.0206469	0.0194239	0.019961	0.0201611	0.0253636	0.024536	0.0233286	0.0236129	0.0243925	0.0257735	0.0195028	0.0223039	0.0219013	0.0206769	0.022479	0.0227377	0.0215847	0.0242739	0.0219271	0.0193819	0.026515	0.024604	0.0203938	0.0234628	0.028631	0.0289051	0.025416	0.0250783	0.0252957	0.0262495	0.0255282	0.0253935	0.0251182	0.0266573	0.0234872	0.0213695	0.0237876	0.0254691	0.0270396	0.0280176	0.0341896	0.0330391	0.0220854	0.0232417	0.022244	0.0223276	0.0238567	0.0214711	0.0176802	0.0202432
0.0153743	0.0149316	0.016643	0.0154733	0.0205839	0.0199327	0.0181733	0.0191259	0.0195012	0.0222059	0.0164736	0.0165119	0.0164573	0.0173185	0.0175897	0.0184112	0.0190181	0.0230981	0.0184801	0.014454	0.0244755	0.02093	0.0164538	0.0194921	0.0219795	0.0212585	0.0232477	0.0240117	0.0217088	0.0233222	0.0200663	0.0184055	0.022335	0.0214302	0.0188673	0.0177972	0.026419	0.0245917	0.0240199	0.0254919	0.0327932	0.0299176	0.0202733	0.020384	0.0172581	0.018432	0.0222045	0.0187821	0.0161513	0.0156367
0.0172952	0.0150812	0.0181946	0.0179423	0.023431	0.0243517	0.0188973	0.0206147	0.0223536	0.0235044	0.0182022	0.0185581	0.0166937	0.0172362	0.0201731	0.0205569	0.0186491	0.0203605	0.0194631	0.015727	0.0257934	0.023452	0.0182188	0.0193438	0.0217696	0.0241309	0.0225057	0.0249616	0.0239434	0.024946	0.0212708	0.0204287	0.0213011	0.0229103	0.0176689	0.015774	0.0243691	0.0227131	0.0239517	0.028037	0.0358886	0.0329561	0.0247901	0.0255608	0.0220465	0.0245131	0.0238652	0.0219779	0.0192111	0.02103
0.0167916	0.0166213	0.01836	0.0197521	0.0239182	0.025149	0.0203543	0.0228162	0.0237595	0.0247037	0.0193632	0.0203257	0.0192227	0.0204834	0.0193364	0.0218699	0.0198726	0.0236248	0.0210687	0.0198085	0.0279364	0.0265527	0.0203905	0.023027	0.0262162	0.0278103	0.0262299	0.0285036	0.0258196	0.0268446	0.0243707	0.0238606	0.0224582	0.0259942	0.0200648	0.0196665	0.0306535	0.0301205	0.0279943	0.0301582	0.0408845	0.0378199	0.0265617	0.0279303	0.0234042	0.0237386	0.0272968	0.0257098	0.0188119	0.0217715
0.0121437	0.0104257	0.0100872	0.0100403	0.0106653	0.00970835	0.0132265	0.0113226	0.00937918	0.00789175	0.0142651	0.0145816	0.0158238	0.0136585	0.013404	0.0116948	0.0170007	0.0168258	0.0133002	0.0154793	0.0183657	0.0185782	0.0112501	0.0113736	0.0152275	0.017866	0.0163726	0.0182296	0.0191242	0.019282	0.0194559	0.0221689	0.0202151	0.0212362	0.0165638	0.0123348	0.0267639	0.0215493	0.0243095	0.0277304	0.0185937	0.0186546	0.0140367	0.0146426	0.0147734	0.0148324	0.0184764	0.017207	0.0119749	0.014734
0.0103635	0.00930826	0.00799197	0.00782382	0.00842663	0.00756275	0.011113	0.0090012	0.00808458	0.00652657	0.0124529	0.013903	0.0142433	0.0125379	0.0121247	0.0104864	0.0144321	0.0159386	0.0111373	0.0122097	0.0168048	0.0150534	0.00836879	0.00895236	0.0121188	0.0139897	0.0137499	0.0141297	0.0156899	0.016941	0.0153996	0.0181773	0.0170414	0.0187072	0.0149281	0.0103222	0.0200906	0.01629	0.0180162	0.0213054	0.0152641	0.0149326	0.014462	0.014972	0.0125481	0.0128184	0.0181481	0.015404	0.0110765	0.0117784
0.0209892	0.0206406	0.0229652	0.0229303	0.028116	0.028488	0.0235045	0.0272473	0.0277033	0.0281592	0.0194587	0.0247934	0.0227307	0.0239741	0.0234518	0.0241071	0.0253914	0.0251492	0.0229779	0.0233621	0.0312069	0.0262289	0.022951	0.0270081	0.0294756	0.0289292	0.0278132	0.0287483	0.0280322	0.0285818	0.0281536	0.0274137	0.0272941	0.0281498	0.0277692	0.0254376	0.035573	0.0330792	0.0351721	0.0327156	0.0425331	0.0372005	0.0325197	0.0314407	0.0303515	0.0290668	0.0291667	0.0266898	0.022935	0.0234721
0.0108389	0.00913394	0.00920661	0.00811027	0.00899269	0.00775172	0.0110542	0.00906982	0.00805937	0.00687582	0.0132679	0.0129004	0.0151132	0.0126083	0.0117723	0.0107108	0.0159796	0.016412	0.0121064	0.0140986	0.0181595	0.018074	0.00916324	0.0103917	0.0139352	0.0152598	0.0152528	0.0155426	0.0175225	0.0164229	0.016799	0.021172	0.0198418	0.0225043	0.0159582	0.0118173	0.0256699	0.0206167	0.0212092	0.0260379	0.0171573	0.0189941	0.0170685	0.0168763	0.0150982	0.0152709	0.0206541	0.0194489	0.013253	0.0143007
0.0170818	0.0153468	0.017257	0.0168024	0.0230195	0.0236574	0.0194776	0.0207411	0.0241861	0.0255971	0.0181195	0.019702	0.0190386	0.0191163	0.0202359	0.0218418	0.0226081	0.0235842	0.0185555	0.0160484	0.0292339	0.0264588	0.0201896	0.0216889	0.026435	0.0264769	0.0294391	0.0302766	0.0265872	0.0259342	0.0226255	0.0212787	0.0236237	0.0227612	0.0185099	0.0173795	0.0287437	0.0264858	0.0292591	0.0288493	0.0369019	0.031894	0.0241994	0.0227564	0.0215635	0.0223785	0.026788	0.0223576	0.0177268	0.0171295
0.0112189	0.00998802	0.00895814	0.0092712	0.00928483	0.00860574	0.0116881	0.0101802	0.00820746	0.00690447	0.014824	0.0138467	0.016128	0.0132401	0.0126615	0.0111539	0.0162392	0.0163918	0.0124641	0.0131976	0.0168425	0.0183439	0.00965036	0.010984	0.0133427	0.0149667	0.0138271	0.0148898	0.0161392	0.0157976	0.0155027	0.0204313	0.0210009	0.0216892	0.0200477	0.0124773	0.0180989	0.0142802	0.0177211	0.0232042	0.0138026	0.0133025	0.01664	0.0173286	0.0153595	0.0142059	0.0204588	0.0181343	0.0103209	0.0119333
0.00981612	0.00899208	0.00896824	0.0076325	0.00865422	0.00760359	0.00992565	0.00774101	0.00822117	0.00689588	0.012702	0.012617	0.014648	0.0123388	0.0131212	0.011637	0.0152077	0.0160504	0.0121815	0.0137058	0.0163697	0.0165979	0.00997376	0.0108969	0.0129957	0.0147285	0.0139881	0.0146318	0.0167155	0.0161008	0.0145369	0.017852	0.0152058	0.0185069	0.0147788	0.0113757	0.0224294	0.0172897	0.0214221	0.0244859	0.0142004	0.0171256	0.016015	0.0169486	0.0139361	0.014341	0.0200534	0.0189598	0.0113279	0.0123021
0.0106621	0.0106589	0.00914037	0.00872788	0.00884103	0.00781973	0.010349	0.00808519	0.00781318	0.00659881	0.0122056	0.0126579	0.0144051	0.0116195	0.010975	0.00911111	0.015406	0.0175745	0.00964994	0.0127369	0.0180336	0.0183878	0.00898332	0.00939986	0.01342	0.0155276	0.0144001	0.0153906	0.0160532	0.0158759	0.0135173	0.0216348	0.0179817	0.0225342	0.0191097	0.0133297	0.019102	0.0165283	0.0174662	0.0219735	0.0123573	0.0139047	0.0142993	0.0151454	0.0143981	0.0155105	0.0176539	0.0161541	0.0126991	0.0140837
0.00908938	0.00729397	0.00695008	0.00725394	0.00696887	0.00629642	0.00845323	0.00649782	0.00650986	0.00563627	0.0105557	0.0104319	0.011853	0.00957635	0.0104372	0.00883073	0.0134724	0.0137865	0.00937549	0.0117855	0.0145265	0.0149982	0.00724072	0.00749878	0.0108425	0.0124462	0.0116588	0.0126922	0.0147002	0.0137303	0.0129329	0.0163993	0.01552	0.0185221	0.0131923	0.00984971	0.0174043	0.0135087	0.0155534	0.0194384	0.0116076	0.0125643	0.012226	0.0131919	0.0107453	0.0115369	0.0153217	0.0148233	0.00935268	0.010182
0.01836	0.0159421	0.0191103	0.0182872	0.0244883	0.025087	0.0209679	0.0211767	0.0268518	0.025436	0.0206143	0.018847	0.0214887	0.0181267	0.0236658	0.0233062	0.0238182	0.022599	0.0191852	0.0198416	0.023623	0.024835	0.0189525	0.0233254	0.0258554	0.0259719	0.0241006	0.023723	0.0277997	0.0263594	0.02224	0.0229323	0.0240126	0.0249245	0.0191383	0.0155871	0.0290874	0.0282645	0.0276971	0.0290525	0.0354069	0.0310951	0.0241676	0.0246348	0.0222813	0.0209234	0.0234581	0.0207502	0.0200661	0.0186736
0.0164332	0.0154837	0.0190837	0.0189817	0.0248089	0.0245546	0.0206096	0.0208692	0.0220405	0.0232106	0.0188789	0.0181566	0.0160333	0.0166631	0.0200505	0.0198688	0.0207657	0.0221333	0.0204143	0.017016	0.0291483	0.0273928	0.0199894	0.0223049	0.0274049	0.0269358	0.0240278	0.0260309	0.0262207	0.0250744	0.0263535	0.0242089	0.0229765	0.0256802	0.0209577	0.0208488	0.0266335	0.0259765	0.0270685	0.0278809	0.0376217	0.034071	0.0202839	0.0204673	0.020436	0.0199204	0.0228478	0.0209351	0.0160369	0.016984
0.0181018	0.0175093	0.0169497	0.0176475	0.0224762	0.0220973	0.0202278	0.021477	0.0204513	0.0229158	0.0180526	0.0161283	0.015213	0.0170751	0.0172518	0.0185887	0.0202962	0.0209685	0.0192091	0.016911	0.0250803	0.0253696	0.0163533	0.0177401	0.0214755	0.0224818	0.0222644	0.0242716	0.0217055	0.0225804	0.0223733	0.0224399	0.0237328	0.0245869	0.0223054	0.0206406	0.023639	0.0240004	0.0281526	0.0278318	0.0360025	0.0315742	0.0205573	0.0218172	0.0187207	0.0189123	0.0234452	0.0206157	0.0165511	0.0168355
0.015766	0.015037	0.0190075	0.0189245	0.0239841	0.0239692	0.0195392	0.0207102	0.0234792	0.0237973	0.0181643	0.0184904	0.0174704	0.0192593	0.0209048	0.0209799	0.0174809	0.0212139	0.0213935	0.018389	0.0283014	0.0224326	0.0203316	0.023069	0.0243279	0.0223892	0.0241867	0.0264537	0.0238356	0.0249855	0.0192482	0.0195542	0.0200025	0.0216298	0.0204141	0.0201246	0.0269942	0.0257051	0.0296794	0.0299282	0.0366094	0.0322986	0.0247715	0.0245933	0.0203823	0.0194647	0.0251901	0.0222363	0.0167996	0.0172223
0.0133719	0.011836	0.010653	0.00965482	0.0101799	0.00958322	0.0138138	0.011008	0.00982514	0.00867066	0.015574	0.016368	0.0181496	0.0147219	0.0142462	0.0115139	0.0185685	0.0192141	0.0123762	0.0137627	0.0190872	0.0194713	0.0113334	0.0117715	0.0145536	0.016811	0.0149844	0.0175531	0.0202024	0.0194369	0.0180707	0.0232551	0.0221283	0.025555	0.0221784	0.0151871	0.0252237	0.0211265	0.024042	0.0292814	0.0185244	0.0206507	0.0186554	0.0183319	0.0164172	0.0168539	0.0235466	0.0216403	0.0135816	0.0139986
0.0150586	0.0142493	0.0165585	0.0177489	0.0227121	0.0225779	0.0186701	0.0194512	0.0202565	0.0237714	0.0177947	0.0168099	0.0184069	0.0178891	0.0185393	0.0205351	0.0174104	0.0206088	0.0183606	0.0147833	0.018677	0.0201208	0.0172671	0.0186942	0.0211544	0.0212981	0.0211456	0.0220747	0.0209841	0.0219235	0.0223081	0.0213214	0.0238136	0.0218481	0.0211079	0.0180833	0.0194898	0.0149173	0.0251526	0.028155	0.0307069	0.0277264	0.0184247	0.0186912	0.0171768	0.0160641	0.0219301	0.0171883	0.0122368	0.0133786
0.0110005	0.0101916	0.00885261	0.0084949	0.00919988	0.00803169	0.0104338	0.00896191	0.00854186	0.00707005	0.0130631	0.0130446	0.0143254	0.0115658	0.0134541	0.0102927	0.0153311	0.0163467	0.013081	0.013768	0.017209	0.0168953	0.0100186	0.00975306	0.013569	0.0151304	0.0137119	0.0159099	0.0170653	0.0166278	0.0170615	0.0200112	0.0179856	0.0214539	0.0173468	0.0121407	0.0229789	0.0185383	0.0220777	0.0243686	0.0155889	0.0168603	0.016684	0.017351	0.0158454	0.0163354	0.0226033	0.0196848	0.013137	0.0144202
0.0111733	0.00934766	0.00815054	0.00848841	0.00840437	0.00762313	0.0109797	0.00894925	0.00798333	0.00691412	0.0129077	0.0131398	0.0143808	0.0125136	0.011702	0.00979256	0.0154223	0.0144863	0.0126195	0.0128856	0.015415	0.0151842	0.00893215	0.00921546	0.0122934	0.0139119	0.0130763	0.0136435	0.0164239	0.0156614	0.0149599	0.0180856	0.0172268	0.0193478	0.0159818	0.0117054	0.0224594	0.0176674	0.0203213	0.0227203	0.014917	0.0154531	0.0140384	0.0143678	0.013106	0.0126921	0.0189197	0.0170092	0.0107907	0.0118143
0.0187029	0.016809	0.0203135	0.0185602	0.0254358	0.0255525	0.0232991	0.024838	0.026164	0.0264785	0.0210082	0.0216153	0.0212239	0.0205074	0.0223982	0.0230345	0.0254592	0.0244416	0.0190797	0.0204265	0.0262705	0.0243829	0.0221682	0.0239346	0.0263119	0.0255457	0.026198	0.0279645	0.025491	0.0268542	0.0241971	0.0239174	0.0237038	0.026354	0.0178211	0.0179032	0.0291483	0.0281511	0.0279644	0.028858	0.0340104	0.0321258	0.0247367	0.0260133	0.0219495	0.0216333	0.0246969	0.0242031	0.0162668	0.0163155
0.0108103	0.0107252	0.0146073	0.0132779	0.0203384	0.0190922	0.0152987	0.0178635	0.0186622	0.0193741	0.015156	0.015485	0.0139202	0.0147443	0.0159795	0.0168497	0.0146558	0.017263	0.013976	0.013272	0.0182552	0.0187527	0.0153101	0.0177963	0.0202567	0.019701	0.0190231	0.0197076	0.018812	0.021314	0.0183978	0.0184093	0.0190237	0.0203825	0.014301	0.0137986	0.0206698	0.0197051	0.0214471	0.0223682	0.0273214	0.0252811	0.0157799	0.0152948	0.0143901	0.0154957	0.0188815	0.0159306	0.0109472	0.0112507
0.0154757	0.0142307	0.0154079	0.0160407	0.0206191	0.020225	0.0173841	0.0173243	0.0187053	0.0194092	0.014582	0.0143932	0.0142466	0.0130517	0.0173086	0.018167	0.0155085	0.0167341	0.0140449	0.0121918	0.0232336	0.0243513	0.0149108	0.0140002	0.0218176	0.0219105	0.0217911	0.0230054	0.0195064	0.021218	0.0213169	0.0209366	0.0234307	0.0238214	0.0201761	0.0183209	0.016149	0.0166294	0.024399	0.0260674	0.0293598	0.0273524	0.0163669	0.018238	0.0159408	0.0161065	0.0224138	0.0184321	0.0123384	0.0136473
0.0104864	0.0084968	0.0083257	0.00827803	0.00849116	0.00731192	0.0097901	0.00830426	0.00786067	0.0066036	0.0114458	0.0111102	0.0128349	0.0111489	0.0110785	0.00951705	0.0138878	0.0140537	0.00974469	0.0117909	0.0161441	0.0164658	0.00832735	0.00958545	0.0129689	0.0142118	0.0132743	0.0143936	0.0157892	0.0148454	0.0151434	0.0183524	0.0180379	0.0195962	0.0169802	0.0117666	0.0219049	0.0180973	0.0212159	0.0246362	0.0153004	0.0155833	0.013561	0.0148256	0.012376	0.0127404	0.0176193	0.0160602	0.00993555	0.0118083
0.0115447	0.00999929	0.00879171	0.0093332	0.0102522	0.00870273	0.0125015	0.0105425	0.00905973	0.00705685	0.0146117	0.0134453	0.0155575	0.0122291	0.0130247	0.0105601	0.0153425	0.0142811	0.012837	0.0143264	0.0159772	0.0149672	0.0105837	0.0104181	0.0136694	0.0155134	0.0152407	0.0161777	0.0178879	0.0169569	0.0181444	0.0204686	0.0171213	0.0186715	0.0132179	0.00966584	0.0208069	0.0172215	0.0205439	0.0229052	0.0162477	0.0158978	0.0145893	0.0148001	0.0135216	0.0131249	0.0196852	0.0180964	0.0097889	0.0123461
0.0119242	0.0115484	0.0154777	0.0177911	0.0243051	0.0239302	0.0185831	0.0205593	0.025339	0.0259727	0.0152291	0.0164958	0.0197058	0.0194226	0.022425	0.0213072	0.0177128	0.0200837	0.0166022	0.0148331	0.0248129	0.0257808	0.0189449	0.0213719	0.0263918	0.0270013	0.0243609	0.0254209	0.0239426	0.0238407	0.0223628	0.0226646	0.0206251	0.0226991	0.0165499	0.0148835	0.0240348	0.0194397	0.0247658	0.0242809	0.032652	0.0260168	0.0204699	0.0215712	0.0159509	0.016607	0.0216577	0.0196014	0.0126715	0.0144328
0.0162845	0.0175675	0.0176475	0.017655	0.0210936	0.0214552	0.0212365	0.0235941	0.0224919	0.022142	0.0142254	0.0143721	0.0179905	0.0164172	0.0192427	0.018869	0.0165861	0.0193562	0.0193608	0.0168053	0.0221401	0.0212299	0.0173142	0.0201653	0.021887	0.0222376	0.0212459	0.0225185	0.0158028	0.0165303	0.0244763	0.0231696	0.0258242	0.0271306	0.0204974	0.0171981	0.0189814	0.0150714	0.0197951	0.0217096	0.0299236	0.0263037	0.0219485	0.0207155	0.0210421	0.0205214	0.0221864	0.0196354	0.0167341	0.0178969
0.0148248	0.0133307	0.0130261	0.0145327	0.0163447	0.0168321	0.0157579	0.0165768	0.0166858	0.0179418	0.0141276	0.0147423	0.0133423	0.0144729	0.0129406	0.0141468	0.0153169	0.0176158	0.0186026	0.0140328	0.0191052	0.0169318	0.0142118	0.0167312	0.0166764	0.0175292	0.0167829	0.0188239	0.0185321	0.0197056	0.014658	0.0144249	0.0166432	0.0175387	0.0159294	0.0129839	0.0186091	0.0167021	0.0194318	0.0221339	0.0294568	0.027172	0.0158524	0.0160873	0.0154843	0.0142831	0.0185622	0.0157775	0.0123152	0.0123479
0.0156943	0.0145125	0.0178518	0.0172767	0.0214944	0.0226941	0.0187905	0.0210641	0.0237653	0.0249299	0.016826	0.0184759	0.0178816	0.018619	0.0219915	0.0223532	0.0186294	0.0214567	0.0207587	0.0170063	0.0261712	0.0260186	0.0183956	0.0205116	0.023396	0.0238044	0.0233416	0.0254714	0.0226673	0.0245373	0.0227487	0.0215794	0.0246376	0.0242345	0.0222735	0.0210668	0.0225803	0.0201862	0.0235949	0.0262081	0.0312917	0.0295294	0.0203717	0.0223097	0.0168847	0.0161664	0.025016	0.020438	0.0148581	0.0151582
0.00978661	0.00894572	0.0075589	0.00788786	0.00784991	0.00715653	0.0100022	0.00874802	0.00736199	0.00640767	0.0115865	0.0116162	0.0135934	0.0112017	0.0119372	0.0103241	0.0152064	0.0143761	0.0103427	0.0111697	0.0145452	0.014348	0.00802096	0.0090542	0.0123899	0.0140039	0.0122564	0.0140279	0.0170852	0.0158482	0.0149316	0.0177533	0.016812	0.018043	0.0146102	0.00938794	0.0216436	0.0177951	0.0188333	0.0224651	0.0148682	0.0155957	0.0141787	0.013744	0.0133852	0.0143073	0.0183105	0.0168657	0.0100587	0.0119383
0.00998605	0.00896002	0.00906222	0.00937222	0.00790615	0.00734095	0.0102902	0.00843736	0.00782895	0.00601917	0.0120285	0.0121764	0.0143686	0.0120229	0.0108019	0.00943884	0.0145224	0.0146169	0.0117642	0.0131387	0.0181385	0.0172326	0.00831022	0.00887375	0.0134989	0.0149208	0.0136396	0.0157102	0.0165549	0.01535	0.0163534	0.0203997	0.0184938	0.0213006	0.0168611	0.0117984	0.0214285	0.01735	0.0206782	0.0251657	0.0162847	0.0179747	0.0132568	0.0152593	0.0127313	0.0135147	0.0201765	0.0171716	0.0105734	0.0118564
0.0161992	0.01611	0.0152707	0.0146984	0.0204942	0.0185816	0.0154507	0.017795	0.0172138	0.0192859	0.0151905	0.0157754	0.014511	0.0146886	0.0167242	0.0158925	0.0161285	0.0189151	0.0156918	0.0125229	0.022792	0.0194926	0.0159573	0.0164305	0.0188967	0.0199814	0.0214192	0.0220485	0.0193742	0.0221139	0.0190252	0.0195299	0.0191435	0.0206615	0.0192364	0.0188132	0.0254965	0.0231657	0.025117	0.0264574	0.0324093	0.0286588	0.0208071	0.0205363	0.0180092	0.0182411	0.0227498	0.0199453	0.0168204	0.0181122
0.00848314	0.00742809	0.00636	0.00629243	0.00727658	0.00631418	0.00826254	0.00661814	0.00639088	0.00551404	0.0110166	0.0104878	0.0124004	0.0102683	0.0112352	0.00943437	0.012514	0.0131418	0.00891565	0.0103731	0.0141909	0.0134254	0.00711936	0.00773445	0.0106872	0.0120677	0.0104802	0.0121288	0.0137394	0.012843	0.011325	0.0164857	0.0151336	0.0177369	0.0140903	0.00984478	0.0159319	0.0121374	0.0143337	0.0173021	0.00977471	0.0121973	0.0140623	0.0153513	0.0117721	0.0124173	0.0182517	0.0163668	0.00940427	0.0104456
0.0186737	0.0176452	0.0195665	0.0212755	0.0269538	0.0269036	0.0209575	0.0232061	0.0263302	0.0285396	0.0190097	0.0191285	0.0194229	0.0196328	0.0222384	0.0232144	0.0228696	0.0244054	0.0245527	0.0201792	0.0332786	0.0287163	0.0224545	0.0250526	0.0290797	0.0289886	0.02953	0.0300253	0.0281129	0.027783	0.0271384	0.0260554	0.0232018	0.0240719	0.0215534	0.0209569	0.0315013	0.0304507	0.030053	0.031129	0.0382756	0.033536	0.0265659	0.0280415	0.0220563	0.022714	0.0282119	0.0270007	0.0197435	0.0171034
0.0119962	0.0126993	0.0142296	0.0156028	0.0191186	0.0189979	0.0153059	0.0161597	0.0184555	0.0192702	0.0139976	0.0133902	0.0141066	0.0136625	0.0159778	0.0163759	0.0149073	0.0165382	0.0168507	0.0144269	0.0235426	0.018624	0.0153124	0.0165073	0.0198395	0.0185922	0.018652	0.0197804	0.0198809	0.0212775	0.0157438	0.0154434	0.017776	0.017736	0.0145	0.0108352	0.0265245	0.025743	0.0203708	0.0228444	0.0310385	0.0286847	0.0155219	0.0156949	0.0137994	0.0151711	0.0181888	0.0151033	0.0116966	0.0133686
0.0140475	0.0124403	0.0165329	0.0158172	0.0208039	0.0213196	0.018108	0.0189252	0.0213666	0.0216541	0.0173551	0.0172098	0.0168407	0.0169402	0.0177595	0.0187635	0.0196455	0.0207829	0.0188639	0.0152614	0.0253017	0.0215906	0.0176048	0.0206721	0.0223798	0.0229248	0.0211484	0.0232775	0.0223318	0.0231522	0.0202893	0.0200235	0.0193288	0.0203984	0.0161916	0.0161545	0.025872	0.0248562	0.0220358	0.0247478	0.0320719	0.0306475	0.0214141	0.0218044	0.0170107	0.0169236	0.0216187	0.0183604	0.0162784	0.0158623
0.0167567	0.0151046	0.01682	0.0164598	0.0227962	0.0243147	0.019499	0.0197104	0.021929	0.0229271	0.018038	0.0191586	0.0184969	0.0158807	0.0189865	0.0190239	0.0210443	0.0209033	0.0188603	0.0172565	0.0233252	0.0222724	0.0176985	0.0194885	0.0257506	0.0250187	0.0230566	0.025098	0.024759	0.0245721	0.0196235	0.0203705	0.0210047	0.0212895	0.0151171	0.0122125	0.0262947	0.0252058	0.024288	0.0252543	0.0329428	0.0275319	0.0205013	0.022851	0.017158	0.0176372	0.0224187	0.0196282	0.0154938	0.0150749
0.0172367	0.0153683	0.0165942	0.0163253	0.0213732	0.0211797	0.0186817	0.0184154	0.020541	0.0210012	0.0168413	0.0153676	0.0150218	0.0162115	0.0177597	0.0189487	0.0181359	0.0201722	0.018903	0.0151212	0.0218272	0.0230049	0.017111	0.0192303	0.0227064	0.0236786	0.0217583	0.0224003	0.0232978	0.0236878	0.0207392	0.0209337	0.0206313	0.0212535	0.0172186	0.015448	0.0209823	0.0237943	0.0207646	0.0254046	0.0294878	0.0292437	0.0206908	0.0203729	0.0158817	0.0173389	0.023924	0.0201015	0.0154995	0.0157446
0.0175858	0.0154234	0.0180888	0.018201	0.0259379	0.0253545	0.0211358	0.0213816	0.0263673	0.0265703	0.0197725	0.0209529	0.020377	0.0188492	0.0225418	0.0232361	0.0221454	0.0244892	0.0200031	0.0174744	0.0314869	0.0243006	0.0199245	0.0211801	0.0280984	0.025851	0.0262724	0.028523	0.0246499	0.0260303	0.0217498	0.0231004	0.023261	0.0250155	0.0186992	0.0178031	0.0270106	0.0267393	0.0262822	0.0278609	0.0352296	0.0319995	0.0222492	0.0235818	0.0213324	0.020659	0.0251831	0.0217165	0.0175994	0.0176044
0.00809893	0.00659617	0.00635368	0.00574852	0.0063212	0.00508169	0.00726592	0.00548104	0.0053595	0.00436391	0.0100163	0.00935214	0.0107449	0.00881897	0.00899634	0.00771506	0.012322	0.0120542	0.00807946	0.00918065	0.0128434	0.0134565	0.00612872	0.00675947	0.009799	0.0111647	0.00989102	0.0115117	0.0142038	0.0123791	0.011209	0.0151333	0.0158072	0.0173478	0.0131477	0.00889458	0.017409	0.0141128	0.0153379	0.020582	0.0119967	0.0137019	0.0111596	0.0123658	0.0100293	0.0108821	0.0151183	0.0147254	0.00875565	0.0102681
0.0130923	0.014746	0.0147865	0.0154754	0.0201713	0.0227035	0.0162575	0.018423	0.0198289	0.0202096	0.0160137	0.0158362	0.0142669	0.0147359	0.0159683	0.0166743	0.0182491	0.0198061	0.0175508	0.0161657	0.0252155	0.021775	0.0161448	0.018226	0.0205207	0.0220166	0.0222515	0.0234128	0.0207595	0.0223171	0.0178854	0.0187579	0.0194377	0.0217617	0.0177346	0.0148829	0.0249711	0.0242144	0.0256174	0.0275086	0.0337702	0.0295344	0.0218423	0.0215255	0.0214351	0.0212176	0.0231544	0.0196521	0.0169576	0.0156036
0.0166615	0.0140557	0.0206656	0.020823	0.0279445	0.0257391	0.021437	0.0209381	0.0257859	0.02577	0.0179017	0.0193775	0.0188377	0.0174364	0.0231766	0.0217802	0.0195438	0.0224449	0.0215068	0.0187169	0.0304306	0.02795	0.0233131	0.0238728	0.0282271	0.0265489	0.0285583	0.0289175	0.026151	0.0260402	0.026536	0.0256921	0.0232518	0.0246162	0.0193056	0.0203943	0.0301692	0.024532	0.0296958	0.0306266	0.039501	0.0327707	0.0244011	0.0248358	0.0248243	0.0224633	0.0255206	0.0227971	0.0215298	0.020734
0.0169988	0.0170413	0.0186177	0.0176934	0.025074	0.0252136	0.0215086	0.0237946	0.0247121	0.0277063	0.0200914	0.0224525	0.019829	0.0201581	0.0204364	0.0216686	0.02049	0.0251646	0.0205006	0.0173568	0.0275285	0.0255881	0.0196472	0.0209777	0.0282835	0.0275794	0.0248153	0.025687	0.024577	0.0273416	0.0252054	0.0253957	0.0230697	0.0255918	0.0196636	0.0194995	0.0212442	0.02246	0.0241982	0.0262438	0.0320739	0.0313717	0.026017	0.0259276	0.020494	0.0235692	0.0234625	0.0242137	0.0172406	0.021034
0.0177377	0.0173728	0.0171239	0.0163022	0.021857	0.0210851	0.01932	0.0187584	0.0214926	0.020263	0.0183192	0.0184163	0.0176261	0.0170253	0.0192507	0.0187137	0.0192338	0.0205819	0.0179242	0.017192	0.0241628	0.023062	0.0179712	0.0207338	0.0219846	0.0221881	0.0218899	0.0233799	0.0202713	0.0211703	0.0228565	0.0210223	0.0219387	0.0223497	0.0158827	0.013179	0.0246445	0.021049	0.0225379	0.0250258	0.031015	0.02805	0.0198432	0.0197372	0.0173724	0.0176633	0.0227005	0.0179321	0.0176022	0.0143644
0.0179687	0.0181342	0.0190889	0.0195216	0.0259028	0.0257881	0.0233076	0.0232468	0.0267969	0.0278461	0.0164198	0.021402	0.0182005	0.0194587	0.0235382	0.0233784	0.0215616	0.0253599	0.0209965	0.0203531	0.0311809	0.0292917	0.0207655	0.0217845	0.026661	0.0255504	0.0254627	0.0279608	0.0265531	0.0267562	0.0269817	0.0259203	0.0259897	0.0292473	0.020538	0.0200117	0.0278105	0.0297442	0.0298727	0.0320079	0.0380037	0.0359928	0.0235028	0.0244338	0.0219361	0.0228335	0.026182	0.0223765	0.0188163	0.0212188
0.0197793	0.0186478	0.0203538	0.0200668	0.0241974	0.0263002	0.0227027	0.0252093	0.0256236	0.0262237	0.0176333	0.020131	0.0191411	0.0200871	0.0202134	0.0230761	0.0221577	0.025221	0.0218872	0.0195839	0.0297759	0.0231849	0.0201801	0.0238972	0.0265738	0.0282481	0.0271235	0.0264241	0.0221707	0.0235179	0.0281339	0.0264925	0.0256613	0.0256214	0.0253041	0.0231133	0.0234857	0.0240796	0.0265291	0.0276168	0.0343021	0.0304166	0.0246282	0.0257897	0.0241624	0.0230947	0.0277277	0.0238909	0.018436	0.0175642
0.0203112	0.0186016	0.0209261	0.0199008	0.0242236	0.0249482	0.0233479	0.0247087	0.0256242	0.0266369	0.0186657	0.0201427	0.0193988	0.0198945	0.0219092	0.022674	0.0214815	0.0212385	0.0229383	0.0227759	0.0279422	0.0275022	0.0215084	0.0235249	0.0271915	0.0268911	0.0256131	0.0263232	0.0273988	0.0273912	0.0261638	0.0261082	0.0271107	0.029078	0.0229165	0.0227072	0.0339714	0.0308432	0.030897	0.0314816	0.0412834	0.0364942	0.0237687	0.0234471	0.022228	0.0220835	0.0278693	0.0240974	0.0196336	0.0202618
0.0127803	0.0127739	0.0129585	0.0121681	0.0183884	0.0169446	0.0144372	0.0156983	0.016286	0.0165089	0.0115731	0.0122341	0.0138955	0.0124073	0.0128829	0.0135683	0.0140317	0.0156167	0.0134311	0.0113725	0.0198318	0.017396	0.0118973	0.013282	0.0175894	0.0162554	0.0178109	0.0186732	0.015944	0.0166585	0.0135762	0.0134199	0.0161097	0.0168123	0.0132845	0.0111844	0.0168854	0.0143472	0.0152037	0.017128	0.0249199	0.0228257	0.0137862	0.0139396	0.0133071	0.0138185	0.0164769	0.0132521	0.0124673	0.0140035
0.010709	0.00994773	0.00800523	0.00859436	0.00831605	0.00795352	0.0105196	0.0089529	0.00830611	0.00677423	0.0129434	0.0115553	0.0141734	0.0110365	0.0112453	0.00963843	0.0153183	0.0165462	0.0109391	0.0114166	0.017356	0.0178952	0.00876346	0.0091329	0.0134388	0.0153553	0.0137396	0.0157234	0.0169241	0.0158689	0.0162694	0.0217522	0.0183477	0.0221208	0.0178507	0.0135687	0.0235832	0.0187701	0.0210984	0.0260277	0.0150791	0.0164057	0.0154306	0.0167861	0.0143767	0.0145765	0.0198383	0.0185985	0.0124297	0.0122321
0.0125073	0.0126266	0.0131579	0.0135637	0.0196773	0.0192448	0.0148254	0.0165062	0.0186323	0.0169697	0.0158016	0.0164991	0.0143005	0.0146036	0.0155036	0.0162053	0.0140565	0.018838	0.0170058	0.0137263	0.0183307	0.0197379	0.0158392	0.0175564	0.022164	0.0202094	0.0201233	0.0211781	0.0193043	0.0211955	0.0189343	0.0183279	0.0182842	0.0192612	0.0146641	0.0135628	0.0185479	0.018644	0.01911	0.0209716	0.0290259	0.0265753	0.0169579	0.019334	0.0136487	0.0155476	0.0201597	0.0181678	0.0130096	0.0132757
0.0167736	0.0149234	0.0198066	0.0196503	0.0254727	0.0249843	0.0231395	0.0250847	0.0246807	0.024729	0.01969	0.0212446	0.0196273	0.0207632	0.0222961	0.0236766	0.0198734	0.0224431	0.0207449	0.0183993	0.0326068	0.0292855	0.0188438	0.0222379	0.0257558	0.0256816	0.0284834	0.0286159	0.0265511	0.0276908	0.0244313	0.0240203	0.0250614	0.0278123	0.0208791	0.0171692	0.0315574	0.0290938	0.0310763	0.0320005	0.0384757	0.0333028	0.0226974	0.0223567	0.0214822	0.0217621	0.0255254	0.0243295	0.0176491	0.0163272
0.016338	0.0139249	0.0192292	0.0202753	0.0221347	0.023679	0.0198945	0.0208779	0.0218088	0.0254551	0.0179303	0.0175468	0.0152388	0.0184756	0.0192146	0.0212294	0.0180353	0.0200385	0.0202124	0.0157361	0.0251829	0.0223934	0.0224518	0.0233104	0.0258464	0.0262775	0.0227163	0.0250297	0.0226835	0.0243851	0.0240719	0.0220297	0.0214225	0.0221142	0.0200484	0.0173026	0.029551	0.0264175	0.0261296	0.0272307	0.0367511	0.0322019	0.0208726	0.0218706	0.0182698	0.0194061	0.0220004	0.0195505	0.0153449	0.0164908
0.0158261	0.0135687	0.0179015	0.018157	0.0238242	0.022693	0.0193975	0.0212609	0.0239117	0.0230723	0.0178805	0.0184106	0.0187929	0.0175647	0.0191268	0.0174338	0.0190908	0.0214386	0.0186931	0.0154338	0.0223514	0.0200869	0.018238	0.0203622	0.0237237	0.0241931	0.0237214	0.0251644	0.0241813	0.0227779	0.0213137	0.0212736	0.0220173	0.0236528	0.0187401	0.0145884	0.0241859	0.022174	0.0236269	0.0244447	0.0327816	0.0282494	0.0196441	0.0196836	0.0173362	0.0186032	0.0240923	0.0186961	0.0147642	0.0176477
0.0159076	0.0167118	0.0202964	0.0192004	0.0242765	0.0243888	0.0216026	0.0230183	0.022736	0.0241663	0.018572	0.0184983	0.0204906	0.0211512	0.0229773	0.0240185	0.0197366	0.0208857	0.0176236	0.0162165	0.0284869	0.0252628	0.0193871	0.0215357	0.0265027	0.0252537	0.0264906	0.0246631	0.0251262	0.0259478	0.0257756	0.02325	0.0240444	0.0258978	0.0192156	0.0192582	0.0289679	0.0236561	0.0266385	0.0279513	0.034301	0.0305687	0.0228479	0.0236676	0.0186476	0.019537	0.0248494	0.022196	0.0182967	0.0192515
0.0211082	0.0186493	0.0204637	0.0199107	0.0263297	0.0273899	0.0222767	0.0241657	0.0249622	0.0273317	0.0199261	0.0204027	0.018777	0.0203521	0.0217219	0.0227258	0.0217651	0.0234151	0.0226397	0.0191145	0.0268215	0.0270088	0.0201617	0.0225356	0.0273518	0.0270082	0.0279551	0.0288841	0.0256243	0.0273922	0.0253321	0.025718	0.0285219	0.0291388	0.022731	0.021923	0.0285741	0.0280616	0.0302747	0.0306861	0.039683	0.0353233	0.026548	0.0249325	0.0254475	0.0235274	0.0260079	0.0239229	0.0196124	0.0187983
0.0170472	0.0148835	0.0201445	0.0192787	0.0239574	0.0259074	0.0226295	0.0229516	0.0245205	0.0267259	0.0207549	0.0207118	0.0214078	0.0208626	0.0220194	0.022654	0.0231955	0.0249152	0.0219939	0.0195796	0.0310604	0.0296674	0.0203197	0.0246424	0.0285263	0.0281352	0.0270626	0.030008	0.0267447	0.0273751	0.0235254	0.0244831	0.0237345	0.0258178	0.0191566	0.0174074	0.0299748	0.0298898	0.0258409	0.0285557	0.0361294	0.0337643	0.024487	0.024599	0.0231888	0.02263	0.0243969	0.0236873	0.0169734	0.0191754
0.0100633	0.00949399	0.00838229	0.00847726	0.00914219	0.00769164	0.010349	0.00863882	0.00832999	0.0069879	0.0122605	0.0134787	0.0145178	0.0119112	0.0128991	0.0104586	0.0153348	0.0155706	0.0110745	0.0126341	0.0162989	0.0159948	0.0091014	0.00965	0.0136387	0.0146754	0.013636	0.0152172	0.0181045	0.0170942	0.0154616	0.0192541	0.0169005	0.018202	0.0155724	0.0114753	0.0237869	0.0195219	0.0205683	0.0230753	0.0161398	0.01646	0.0152935	0.0149512	0.014739	0.014588	0.0197626	0.0165571	0.0113926	0.0134765
0.0124629	0.0145367	0.0122484	0.0116511	0.0168276	0.0157247	0.0142569	0.0152823	0.0169834	0.0166198	0.013706	0.0109055	0.0135851	0.0133856	0.0161523	0.0151877	0.0160466	0.019085	0.0132138	0.0102947	0.0244324	0.016955	0.0128224	0.0137202	0.0174053	0.0159054	0.0202854	0.0195659	0.0172323	0.0170766	0.0186755	0.0157228	0.0218317	0.0193587	0.0200457	0.0185559	0.0269015	0.0201965	0.0231956	0.0219978	0.0329729	0.0261098	0.0259084	0.0247971	0.0230075	0.0205542	0.0250215	0.020623	0.0199223	0.0177684
0.0138804	0.0135219	0.0173192	0.0173503	0.0249208	0.0245651	0.0181969	0.0199413	0.0241463	0.0268908	0.0184569	0.0171642	0.0173523	0.0185278	0.0199315	0.022086	0.0152902	0.0209746	0.0197928	0.0181396	0.026531	0.0253678	0.018769	0.0213649	0.0261901	0.0256162	0.0240776	0.0248296	0.0228873	0.0251174	0.0229831	0.0221657	0.0197018	0.0204613	0.0192176	0.0172673	0.0203026	0.0240351	0.0252296	0.0281651	0.0351464	0.0335856	0.0134308	0.016707	0.0126539	0.0136619	0.016695	0.016521	0.0105396	0.012127
0.0153293	0.0161018	0.0187291	0.0183127	0.0258619	0.0250702	0.0200219	0.0215299	0.0256498	0.0253893	0.0180398	0.0186481	0.0174989	0.0193519	0.0206015	0.0221848	0.0199574	0.0227373	0.0204776	0.0170983	0.0270411	0.0266058	0.0207493	0.0228075	0.0269629	0.0263371	0.0267468	0.027151	0.0243514	0.0245302	0.0241825	0.0224917	0.0221881	0.0229714	0.0210404	0.0194822	0.0297753	0.0278248	0.0274033	0.0292372	0.0377776	0.0340436	0.0209404	0.0223308	0.0200474	0.019919	0.0234123	0.0217859	0.0174648	0.0172514
0.0121438	0.00969529	0.00976599	0.0100019	0.0103264	0.00926708	0.013026	0.0106319	0.00991245	0.00803884	0.0150355	0.0150592	0.0163246	0.0133195	0.0134088	0.0115244	0.0168164	0.0174182	0.0135868	0.014094	0.0192913	0.018351	0.0110877	0.0118971	0.0148578	0.0160938	0.0160596	0.0167375	0.0202562	0.0192311	0.0195967	0.0234864	0.0214448	0.0231221	0.0191398	0.0126071	0.0240535	0.0202783	0.0234648	0.0265629	0.0181725	0.0187427	0.0167581	0.0170347	0.0148904	0.0149689	0.0195752	0.0189616	0.0129393	0.0143738
0.016885	0.0133476	0.0192151	0.0180204	0.0249619	0.0247162	0.0198266	0.0208442	0.0224855	0.0243142	0.0162312	0.0184744	0.0157073	0.0173754	0.0176338	0.020753	0.020498	0.0219009	0.0203195	0.0151572	0.0288471	0.0229849	0.0211564	0.0214808	0.0244411	0.0246207	0.0242837	0.0249577	0.0234166	0.0270322	0.0224721	0.0223733	0.0211464	0.0219244	0.0165463	0.0165594	0.0275993	0.0282238	0.0283227	0.028217	0.0376098	0.0357125	0.0180963	0.019692	0.0168294	0.0173641	0.0216395	0.0164321	0.0143536	0.0157887
0.0117281	0.00961819	0.00992103	0.00975558	0.00943443	0.00855925	0.0125297	0.0100948	0.00832975	0.00708418	0.0137932	0.0125509	0.0159266	0.0118818	0.0126798	0.0101781	0.016236	0.0150316	0.0122412	0.014298	0.0176074	0.0171444	0.00951855	0.0105916	0.0136299	0.0167638	0.0146778	0.0168219	0.0186042	0.0174861	0.0174239	0.0206227	0.0194167	0.0214941	0.0178382	0.0121318	0.024754	0.0199823	0.0221823	0.0266187	0.0168318	0.0183539	0.0159243	0.0174329	0.0146695	0.0145096	0.0203579	0.0200407	0.0112268	0.0138808
0.0180712	0.0162715	0.0209602	0.021168	0.0260768	0.0262277	0.0229041	0.0253388	0.0253073	0.026368	0.020456	0.022064	0.020517	0.0227983	0.0209628	0.0244295	0.0190669	0.0218431	0.020118	0.0164486	0.026214	0.0254443	0.0202259	0.0220055	0.0268299	0.0263311	0.0234733	0.0260912	0.0224235	0.0249225	0.0266142	0.026237	0.0214454	0.0228273	0.0196082	0.0189718	0.0247607	0.0236379	0.0241032	0.0261489	0.0330399	0.0309486	0.021084	0.0212138	0.0203562	0.0208739	0.0231747	0.0195369	0.0200424	0.0185033
0.0151741	0.0146347	0.0167419	0.0170064	0.0233264	0.02358	0.0186632	0.0206574	0.0227747	0.0226353	0.0181857	0.0185915	0.0180856	0.0161631	0.0205524	0.0197047	0.0190959	0.022291	0.0199133	0.0160008	0.024631	0.0230735	0.0202252	0.0219115	0.0259857	0.0239367	0.0255969	0.0276368	0.0233716	0.0237264	0.0215102	0.0213284	0.020422	0.0216918	0.0181466	0.0181993	0.0246957	0.025446	0.0214927	0.0260735	0.0326702	0.0298571	0.0160096	0.0191285	0.0150601	0.0172903	0.0194445	0.0187064	0.0123248	0.0158368
0.0155513	0.0138456	0.016699	0.0169639	0.0220795	0.0213733	0.0179624	0.0194302	0.0213784	0.0225885	0.0175397	0.0160464	0.0167586	0.0160762	0.0190135	0.0195998	0.0180308	0.021672	0.0193659	0.0179005	0.0282745	0.0188734	0.017896	0.0203681	0.024605	0.0241477	0.0232946	0.0251036	0.022718	0.0233908	0.021307	0.0202046	0.0200743	0.0197995	0.0174459	0.0162842	0.0268453	0.0254893	0.026615	0.0276427	0.0371749	0.0363734	0.0192929	0.0201567	0.016224	0.0174538	0.0227683	0.0196743	0.0154976	0.0155388
0.0180113	0.0188765	0.0204631	0.0196331	0.0251412	0.0255498	0.0232648	0.0236778	0.0236448	0.0264477	0.0181674	0.0204108	0.0218417	0.0212115	0.0205746	0.0228299	0.0194684	0.0195294	0.0198355	0.0197233	0.0248882	0.02567	0.0202636	0.0223299	0.0245356	0.0244532	0.0247317	0.0272838	0.023727	0.0253084	0.021912	0.0222895	0.0213664	0.0244631	0.020023	0.0187363	0.0255687	0.0236946	0.0277149	0.027579	0.0382615	0.0334169	0.0189548	0.0211428	0.0181943	0.0200917	0.0212342	0.0199642	0.0146588	0.0170886
0.0150919	0.0140173	0.0171051	0.0169008	0.0210464	0.0216876	0.0177261	0.0182605	0.0203263	0.0218555	0.0172065	0.0166366	0.0165628	0.0171042	0.0171716	0.0184869	0.0171058	0.0208534	0.0187502	0.0159342	0.0238706	0.0225431	0.0176354	0.0186963	0.0206722	0.020919	0.0234747	0.024241	0.0215105	0.0216912	0.0205388	0.0198019	0.0227214	0.0222997	0.0176597	0.0156115	0.0252533	0.0225468	0.0258631	0.0257573	0.0347066	0.0293826	0.0223388	0.0213508	0.0194484	0.0185673	0.0228358	0.0205167	0.0153714	0.0154037
0.0170835	0.016027	0.0197282	0.0183931	0.0276429	0.0256812	0.0231157	0.0235413	0.0276609	0.0293113	0.0207631	0.0230221	0.0194517	0.020103	0.0228453	0.0243475	0.0235065	0.0253906	0.0219432	0.0191949	0.0315335	0.0314368	0.020067	0.0221988	0.0304923	0.0295206	0.0279673	0.0291513	0.0284798	0.0291485	0.0245792	0.0241907	0.0250116	0.0255605	0.0206231	0.0196058	0.0324641	0.0311266	0.0300439	0.0310429	0.0410217	0.036578	0.0246318	0.0253706	0.0218581	0.0209075	0.0258813	0.0236508	0.0196794	0.0215685
0.0198482	0.0190303	0.0208612	0.0202089	0.0266334	0.0272724	0.0223206	0.0241645	0.0244611	0.0253949	0.0207903	0.0218962	0.0218293	0.0202873	0.0219303	0.0217053	0.0185166	0.0251538	0.0258534	0.020389	0.0262087	0.0245777	0.0214845	0.0245103	0.0259894	0.0295234	0.0261218	0.0280281	0.0239993	0.0266969	0.0266994	0.0236014	0.0252965	0.0257342	0.0241348	0.0197004	0.0259457	0.0235409	0.0276007	0.0300857	0.0373165	0.0335601	0.0223888	0.0234995	0.018695	0.0194507	0.0262404	0.0212399	0.0189024	0.0187759
0.0176483	0.0179769	0.0218152	0.019492	0.0274013	0.0286477	0.0254082	0.0260716	0.0279994	0.0281563	0.0197244	0.0228316	0.0208309	0.0232814	0.0259694	0.0262775	0.0247943	0.0251298	0.0210509	0.0182073	0.0343393	0.0294819	0.0223719	0.0232225	0.0290121	0.0293057	0.0281047	0.0303278	0.0269192	0.0273988	0.0296761	0.0263532	0.0266751	0.0276799	0.0230547	0.0222993	0.0285059	0.0269766	0.0295098	0.029971	0.0345396	0.0309023	0.0218761	0.022884	0.0190349	0.0202877	0.0270021	0.0226742	0.0201324	0.0194572
0.01512	0.0152891	0.0183824	0.0188876	0.0230401	0.0256786	0.0182774	0.0205285	0.0237903	0.0241751	0.0186591	0.0189746	0.0172699	0.018919	0.0199181	0.0198953	0.0210574	0.0237324	0.0200687	0.0172691	0.0276244	0.0254959	0.0195095	0.0210646	0.0250648	0.0248137	0.0247976	0.0268355	0.0247928	0.0262158	0.0212177	0.0203065	0.0208189	0.0218776	0.0208497	0.0204611	0.0252691	0.0269978	0.0265595	0.027118	0.0341957	0.0336499	0.019631	0.0213266	0.0194988	0.0184058	0.0233374	0.0215275	0.0142012	0.0154261
0.0165879	0.0148325	0.0182976	0.0186	0.0258503	0.0251571	0.0203535	0.0201428	0.0266532	0.0259605	0.0202935	0.0179216	0.0196038	0.0192865	0.0207913	0.0209996	0.0217714	0.0258474	0.0202864	0.0177984	0.0258167	0.025182	0.0216144	0.0236316	0.0259579	0.0272265	0.0244097	0.0248929	0.0243569	0.0243693	0.0249638	0.0251854	0.0231528	0.0224524	0.0215882	0.0194593	0.0274875	0.0263165	0.0267062	0.0286786	0.0340958	0.0312972	0.0218684	0.0256576	0.0208728	0.0260658	0.0229381	0.0230398	0.0175265	0.0190534
0.00958045	0.00775271	0.00749064	0.00726704	0.00775463	0.00692195	0.00983187	0.00778533	0.00784509	0.00622461	0.0123724	0.0116242	0.0135154	0.0107997	0.0115894	0.00971196	0.0147843	0.0140849	0.00964356	0.0108698	0.0151121	0.0153925	0.00865941	0.00939853	0.0126335	0.014159	0.0129056	0.0143941	0.0163114	0.0145495	0.0138956	0.0186281	0.015972	0.0198129	0.0150489	0.0109509	0.0188878	0.0158347	0.0170252	0.0206865	0.0131242	0.0147531	0.0130067	0.0140546	0.0106262	0.0115136	0.0180832	0.0164462	0.00935426	0.0105191
0.0134653	0.0109933	0.0103267	0.0103391	0.0108772	0.00982069	0.0126637	0.0100542	0.00993165	0.00798863	0.0148938	0.0161263	0.0168104	0.0142017	0.0145046	0.012372	0.0181844	0.0174701	0.0151856	0.0179392	0.0203251	0.0198623	0.0111223	0.0110657	0.0171486	0.017201	0.0170568	0.0172545	0.0203437	0.0208329	0.0207579	0.0244084	0.0223322	0.0256926	0.0193611	0.0136359	0.0261478	0.0211218	0.0252635	0.0277318	0.0171655	0.0169949	0.0187137	0.0193116	0.0163944	0.0156042	0.0227046	0.0205929	0.0130199	0.0152085
0.0192518	0.0164783	0.0225219	0.022247	0.0294902	0.0281269	0.0249761	0.0258065	0.0284784	0.0295613	0.0225077	0.022736	0.0230785	0.0224025	0.0234251	0.0238223	0.0265322	0.0270863	0.0235915	0.0216792	0.0326297	0.0314292	0.0236976	0.0270591	0.0308479	0.031224	0.0307978	0.0309419	0.0305198	0.0290459	0.0254882	0.025952	0.0282522	0.03039	0.023229	0.0222851	0.0305216	0.0272121	0.0292022	0.0289885	0.0365952	0.0316575	0.023871	0.0241331	0.0238469	0.0238654	0.0268261	0.023921	0.0199226	0.0211391
0.0183439	0.0164927	0.0190135	0.0181825	0.0267535	0.0255532	0.0215711	0.0228128	0.0253251	0.0269065	0.0208396	0.02427	0.0194215	0.0220592	0.0229184	0.0236893	0.0220003	0.0222785	0.0231788	0.0204784	0.032361	0.0275538	0.0202863	0.0231266	0.0287961	0.0281855	0.0276599	0.0277768	0.0266911	0.02827	0.0231702	0.0234208	0.0268172	0.0273287	0.0215527	0.0201729	0.0307486	0.027308	0.0301898	0.0305096	0.0383909	0.0332304	0.0254416	0.0242288	0.023084	0.022368	0.027374	0.0232434	0.0209693	0.0211646
0.0182316	0.0166712	0.0210898	0.0194897	0.024724	0.0235751	0.0218426	0.023578	0.0253053	0.0265821	0.0195908	0.0238038	0.0215115	0.0213902	0.0207354	0.0220922	0.0239276	0.0287414	0.0218099	0.0195931	0.0272503	0.024614	0.0207044	0.0248999	0.0266259	0.0262274	0.0250302	0.0263568	0.0275918	0.0288222	0.0207849	0.0204838	0.0227754	0.0229437	0.0166996	0.0170879	0.0297251	0.0269646	0.0268675	0.0272295	0.0350249	0.0303603	0.0254944	0.0257202	0.0235751	0.0224206	0.0250813	0.0212707	0.0202531	0.0202294
0.011242	0.00962409	0.00872971	0.00778713	0.00821016	0.00732519	0.00954281	0.00715915	0.00740998	0.0059561	0.0117242	0.0115519	0.0129769	0.0108228	0.0114556	0.010026	0.0141239	0.0160324	0.0111925	0.0127401	0.0159657	0.0165161	0.00866222	0.00803921	0.0129866	0.0145267	0.0128723	0.0137487	0.0161602	0.0146282	0.014745	0.0185729	0.0204549	0.0227454	0.0186327	0.0128826	0.0195941	0.0159826	0.0177526	0.0224155	0.0140329	0.0159724	0.0153452	0.0166837	0.0135726	0.0136417	0.0205837	0.0188951	0.0102274	0.011517
0.016628	0.0163245	0.0189179	0.0182654	0.0235614	0.0227535	0.0213502	0.0226766	0.0234557	0.0236741	0.0186511	0.0210853	0.0179106	0.018535	0.0214624	0.021601	0.0209583	0.0249058	0.0193019	0.0188189	0.0291947	0.0270808	0.0199965	0.0225274	0.0239516	0.0238322	0.0232553	0.024591	0.0246175	0.0253073	0.0217499	0.0215416	0.022441	0.0247908	0.0213027	0.0189265	0.0264052	0.0249912	0.0240821	0.0248742	0.0310225	0.0274551	0.0213134	0.0210503	0.0190141	0.0196737	0.0236393	0.0200256	0.0164564	0.0167791
0.0106419	0.00837664	0.00800498	0.00808106	0.00876462	0.00764354	0.0104798	0.00787637	0.00807903	0.00684427	0.0120356	0.0114065	0.0132501	0.0108096	0.0115424	0.0092606	0.0146031	0.015099	0.012316	0.0121699	0.0167399	0.016868	0.00958497	0.00953062	0.0127288	0.0138191	0.0142638	0.0148279	0.0158007	0.0143867	0.0158373	0.0192954	0.0197957	0.0215054	0.0200292	0.0128762	0.0211189	0.0153289	0.020425	0.0229035	0.0129522	0.0145436	0.0177256	0.0194958	0.0166562	0.0158631	0.0216506	0.019526	0.0127749	0.0142338
0.00920855	0.00752195	0.00752176	0.0072959	0.00696154	0.00601079	0.008177	0.00607958	0.00641657	0.00545711	0.010287	0.00973368	0.0116538	0.00992097	0.00939901	0.00889002	0.0122552	0.0120793	0.0087828	0.0117784	0.0137029	0.0131608	0.00729871	0.00856965	0.0119194	0.0138036	0.0119284	0.0117418	0.0148307	0.0132346	0.0125681	0.015444	0.0153914	0.0177275	0.0134524	0.00914134	0.0204901	0.0157348	0.0161373	0.01914	0.0133133	0.0145724	0.0119431	0.0122076	0.010174	0.0100174	0.0159666	0.0142015	0.00801892	0.00920988
0.0180077	0.0175453	0.0195736	0.0188875	0.0274053	0.0258234	0.0218601	0.0231213	0.0237808	0.0244382	0.0180234	0.0209276	0.0176497	0.0194432	0.0195929	0.0201224	0.0183438	0.0210196	0.0202705	0.0195989	0.0313608	0.0294095	0.0201552	0.0218583	0.0269401	0.0264001	0.0240853	0.0250728	0.021353	0.0242266	0.0276473	0.0257786	0.0281825	0.028901	0.0259784	0.0242873	0.0238935	0.0215638	0.0340491	0.033163	0.0397199	0.0359302	0.0239658	0.0241408	0.0220224	0.0209066	0.0268464	0.0222612	0.0198906	0.0203027
0.0169543	0.0172745	0.0173239	0.0182931	0.0254817	0.0243399	0.0195848	0.0225441	0.0242286	0.024428	0.0189909	0.0206164	0.0192	0.0196365	0.0219837	0.0216208	0.0207759	0.0229632	0.0198611	0.0163931	0.0273016	0.024946	0.0220078	0.0231894	0.0282741	0.0258488	0.0255213	0.0259412	0.0249467	0.0262551	0.0249247	0.0226474	0.0238828	0.0211789	0.0220677	0.0193274	0.0216667	0.015824	0.0254747	0.0278368	0.033998	0.0318708	0.0197974	0.0224781	0.0184713	0.020983	0.0229322	0.0205902	0.0155336	0.0187688
0.0163995	0.0145395	0.0182501	0.0192498	0.0223138	0.0226782	0.0193669	0.0197273	0.0206735	0.0228499	0.0179946	0.0197111	0.0181735	0.0168307	0.0194806	0.020073	0.0210349	0.023462	0.0208441	0.0182566	0.0252952	0.0245489	0.020166	0.021914	0.0252154	0.0242251	0.0247236	0.0249539	0.0253201	0.0257077	0.0206497	0.0211939	0.0195116	0.022235	0.0178672	0.0175486	0.02988	0.0285073	0.029081	0.0287399	0.0360772	0.0323442	0.0201111	0.0196358	0.0191737	0.0184783	0.0241103	0.0209802	0.0151624	0.0155447
0.0146769	0.0148378	0.0174499	0.0150714	0.0229152	0.0203936	0.0189391	0.0200487	0.020372	0.0209527	0.0150611	0.0175282	0.0154397	0.0174891	0.0178814	0.0192757	0.0156297	0.0210131	0.0172618	0.0141244	0.0224309	0.0257067	0.0173953	0.0179736	0.0208407	0.0207684	0.0217975	0.0233293	0.0199947	0.021811	0.0203396	0.0209374	0.0217838	0.0224815	0.0188561	0.0163958	0.0221204	0.0241375	0.0239575	0.0262565	0.0322329	0.0300447	0.0183315	0.0191264	0.0172606	0.016874	0.0208593	0.0175604	0.0150304	0.0133948
0.0108494	0.00932606	0.00985932	0.0102647	0.0098631	0.00937446	0.0116028	0.0101931	0.00862439	0.00688698	0.0142108	0.0128409	0.0147995	0.0124281	0.014547	0.0117837	0.0166568	0.0149759	0.012702	0.0133711	0.0182025	0.0159939	0.0112978	0.0108941	0.0139238	0.0162928	0.0145632	0.0162751	0.0193984	0.019428	0.0194183	0.0205657	0.019182	0.0191046	0.0171509	0.0117653	0.0248739	0.0212986	0.0232633	0.0257803	0.0187167	0.0192049	0.0171546	0.0161383	0.0162623	0.0152424	0.0201822	0.0179111	0.0126175	0.0141256
0.0179305	0.0166559	0.0180751	0.0181136	0.0253204	0.0253824	0.020442	0.0231834	0.0241004	0.0269717	0.0204433	0.019847	0.0197058	0.0209557	0.0212659	0.0224162	0.0187285	0.0232746	0.018802	0.0173304	0.0251383	0.022993	0.0186915	0.0206131	0.0256504	0.0252049	0.0263463	0.0273944	0.0225988	0.0255254	0.0250301	0.0237458	0.0227743	0.0249901	0.0178252	0.0177914	0.0219504	0.0223015	0.0268088	0.0284819	0.0345548	0.0323761	0.0224	0.0242108	0.0192886	0.0216701	0.0241922	0.0220229	0.0178155	0.0189978
0.0170469	0.0147345	0.0198979	0.0195623	0.0249638	0.024862	0.0215439	0.0228811	0.0242739	0.0248968	0.0174463	0.0188877	0.017659	0.017731	0.0203234	0.0208716	0.019875	0.0216188	0.0206695	0.020254	0.0290808	0.0291526	0.0202748	0.0223342	0.0262424	0.0264061	0.0249482	0.0261576	0.0268091	0.025904	0.0212945	0.0234422	0.0233678	0.0264367	0.016861	0.0182838	0.0298606	0.0287358	0.0287749	0.0297492	0.0392203	0.0357581	0.0243544	0.0229987	0.0225646	0.0221637	0.0231884	0.0204651	0.0177607	0.0184169
0.0109585	0.00900941	0.0086195	0.00833883	0.00887278	0.00807583	0.0107584	0.00894676	0.00863429	0.00673874	0.0132744	0.0128869	0.0144575	0.0115584	0.0128765	0.0107949	0.0156102	0.0162863	0.0121369	0.0137249	0.0176755	0.0175575	0.0104811	0.0106663	0.0137104	0.0151514	0.015105	0.0156484	0.0193	0.0169141	0.015825	0.0204501	0.0167042	0.0194502	0.015169	0.0118472	0.02127	0.0179192	0.021127	0.0234756	0.014772	0.0152585	0.0155348	0.0155301	0.0140862	0.013967	0.0195933	0.0177621	0.00970582	0.0120439
0.0190095	0.0195461	0.0179915	0.0172889	0.0212638	0.0220113	0.0198769	0.0224381	0.0196127	0.021232	0.0177064	0.0179528	0.015921	0.016766	0.0171509	0.018257	0.0186464	0.0203906	0.0211179	0.0187896	0.026117	0.0237251	0.0176602	0.0186441	0.0223032	0.0214167	0.0234165	0.0235995	0.0189248	0.0204923	0.0212129	0.0196351	0.0252195	0.0253311	0.0224972	0.0207848	0.0252172	0.0217397	0.027795	0.0304368	0.0349436	0.0308682	0.0209072	0.0218421	0.0204679	0.020008	0.0246651	0.0205169	0.0178622	0.0150656
0.0105604	0.0086066	0.00806929	0.00736417	0.00929785	0.00835344	0.0113159	0.00885017	0.00806381	0.00705892	0.0130892	0.0126259	0.0141545	0.0119791	0.013763	0.0118562	0.0149685	0.0144896	0.0114937	0.0123036	0.0177356	0.017176	0.00881506	0.00879299	0.0130896	0.0146177	0.0145403	0.0163091	0.0179029	0.0176638	0.0155122	0.0192606	0.0191935	0.020398	0.0165029	0.0120629	0.0232808	0.0195518	0.0221187	0.0263451	0.0168346	0.0172837	0.0160459	0.0151386	0.0157076	0.0144743	0.0195745	0.018518	0.0121149	0.0129186
0.0170968	0.0160749	0.0186522	0.0167266	0.0266773	0.0264983	0.0211712	0.0215988	0.0264606	0.025838	0.0190136	0.0199287	0.0191629	0.0202972	0.0215278	0.0225482	0.0226163	0.0230871	0.0197102	0.0180593	0.0308711	0.0304877	0.0206447	0.0220483	0.0270113	0.0266784	0.0276867	0.0276135	0.0274471	0.027697	0.0217957	0.0226545	0.0219709	0.0239144	0.0177637	0.0167391	0.0310348	0.0278943	0.0313849	0.031435	0.0415865	0.0358575	0.0271186	0.0261728	0.0238988	0.0233811	0.0289029	0.0254442	0.0193477	0.0192024
0.00943908	0.00848461	0.00736747	0.00737644	0.00785597	0.00675313	0.00946198	0.00733322	0.00733416	0.00584361	0.0114546	0.012375	0.0139781	0.0109269	0.0119673	0.00997549	0.0138252	0.0134943	0.0100883	0.0110537	0.0158226	0.0151237	0.00802077	0.00793493	0.0127768	0.0132046	0.0131537	0.0140428	0.0158653	0.0152051	0.0150129	0.0177942	0.0161505	0.0186912	0.0172338	0.0105699	0.0183393	0.0151281	0.017465	0.0196093	0.0133068	0.0144302	0.0143869	0.0145098	0.0130586	0.0119693	0.0186167	0.0167213	0.00994341	0.00990231
0.00932237	0.00691493	0.0066923	0.00633087	0.00687337	0.0062997	0.00928259	0.00699867	0.00696073	0.00560057	0.0104431	0.00991395	0.01202	0.00999432	0.00985283	0.00837701	0.0117096	0.0114561	0.00908112	0.0107302	0.0137979	0.0138773	0.00713942	0.00718681	0.0104369	0.0112894	0.0111274	0.0123826	0.0124954	0.0127519	0.0116712	0.0158543	0.0172958	0.0188027	0.0147368	0.0101168	0.0135916	0.010927	0.0140232	0.0207064	0.00888728	0.0108802	0.0115617	0.0137862	0.010496	0.0111555	0.0161674	0.0151203	0.00909387	0.0105162
0.0119059	0.0103612	0.00966831	0.00955958	0.00906058	0.00840578	0.0122245	0.00990819	0.00853476	0.00693054	0.0140608	0.0124782	0.0143971	0.0121029	0.0122212	0.0101247	0.0160751	0.0154408	0.0130186	0.0138877	0.0164235	0.0159354	0.00914255	0.0100409	0.0131756	0.0144987	0.0148105	0.0148641	0.017576	0.0157039	0.0180528	0.0203755	0.0193893	0.0214001	0.0160637	0.01122	0.023322	0.0192055	0.0195465	0.023792	0.0162023	0.016458	0.0149937	0.0159063	0.0146156	0.0141641	0.0193065	0.0174743	0.0111154	0.0123051
0.0170039	0.014648	0.0177838	0.0175064	0.0204979	0.0200318	0.0195535	0.0199237	0.0196453	0.0204109	0.0187725	0.0187506	0.0163892	0.0177512	0.0185047	0.0186588	0.0204057	0.0224724	0.0208667	0.0181211	0.0255121	0.0230386	0.018489	0.0205439	0.0222733	0.0218622	0.0204605	0.0218233	0.023842	0.0257109	0.018957	0.019733	0.0213471	0.022629	0.0164568	0.0141484	0.0285383	0.0276938	0.0244985	0.0278502	0.0346168	0.0330325	0.0181488	0.0187071	0.0173349	0.0176435	0.0207983	0.0188725	0.0152317	0.0165555
0.0104235	0.00840051	0.00868678	0.00818045	0.00961945	0.00873722	0.0111103	0.00872739	0.00892253	0.00734319	0.0124339	0.0117461	0.0138732	0.0110698	0.0133447	0.0108807	0.0161367	0.0147522	0.01087	0.0118169	0.0163111	0.0168256	0.0102831	0.00966193	0.0137891	0.0162032	0.0156289	0.0159602	0.0171236	0.0158699	0.0179715	0.0195891	0.0183892	0.0199714	0.0158104	0.0108404	0.0227646	0.0180442	0.0196054	0.0224984	0.0159558	0.0158002	0.0182527	0.0176292	0.0157331	0.0162687	0.0201905	0.0185126	0.0117466	0.0125745
0.00770744	0.00657035	0.00608199	0.00575789	0.00621107	0.00563493	0.00660435	0.00508986	0.0059925	0.00493102	0.00992277	0.00914498	0.0104293	0.00777822	0.00927241	0.00752468	0.0122329	0.0120854	0.00805462	0.00977507	0.0125328	0.0131447	0.00689206	0.00729746	0.00992085	0.0114205	0.0101192	0.0114851	0.01251	0.0118541	0.0105349	0.0148044	0.0137135	0.0160525	0.012892	0.00882329	0.0192142	0.0156502	0.0147923	0.0193164	0.0122746	0.0138562	0.0107422	0.0121723	0.010155	0.0105997	0.0142803	0.0146792	0.00799684	0.00936871
0.0160753	0.0146937	0.0162526	0.0158904	0.0210043	0.0200236	0.0179023	0.0195143	0.0206307	0.0201329	0.0168019	0.017729	0.0162392	0.0168816	0.017514	0.0178995	0.0181406	0.0193804	0.0182652	0.0179432	0.0241392	0.0219775	0.0181704	0.0194785	0.0209663	0.0199271	0.0219184	0.0219525	0.0224966	0.0233595	0.0161989	0.0159783	0.0187712	0.0192904	0.01634	0.0159539	0.0251547	0.0234932	0.0237651	0.0244806	0.0344428	0.0304407	0.0217433	0.0212429	0.0194727	0.0200296	0.0224502	0.0193511	0.0164286	0.0170506
0.0175404	0.0172484	0.020334	0.0203522	0.0272723	0.0271685	0.022146	0.0233617	0.0253641	0.0271009	0.0214505	0.0216949	0.0194863	0.0208558	0.0220663	0.0221726	0.0201775	0.0238788	0.0223892	0.0223874	0.0303536	0.0246017	0.0237371	0.0257758	0.0279817	0.0283301	0.0262039	0.0262858	0.0256373	0.0271885	0.0243879	0.0239677	0.0242802	0.0251653	0.0184538	0.017159	0.0293447	0.0284317	0.0280671	0.0297564	0.0390179	0.0368872	0.0238196	0.0240253	0.0214874	0.0206516	0.0242657	0.0219993	0.0166983	0.0178094
0.0183753	0.0169089	0.0192066	0.0182872	0.0240979	0.0229089	0.0222371	0.0231255	0.0225342	0.025004	0.0197811	0.0225584	0.0184202	0.0187423	0.018517	0.0209834	0.0221836	0.0246824	0.0198397	0.0181719	0.0214292	0.022321	0.0191992	0.0212144	0.0234166	0.0232356	0.0233189	0.0249567	0.0245185	0.0250719	0.0208762	0.0210019	0.0240725	0.0255829	0.0175303	0.016369	0.0240832	0.0222666	0.0238108	0.0263781	0.0306419	0.0281617	0.0223995	0.0241333	0.0207497	0.0203097	0.0258431	0.022378	0.0171367	0.0190648
0.0159553	0.0146309	0.0158086	0.0159529	0.0207265	0.0209197	0.0176687	0.0175562	0.0206953	0.0213818	0.0170786	0.0151302	0.0151034	0.0152008	0.0176445	0.0176612	0.0176142	0.0182627	0.0182599	0.0155576	0.0237695	0.0212319	0.0168819	0.0186689	0.0207061	0.0202429	0.0208874	0.0224728	0.0213567	0.020957	0.0200443	0.0194786	0.0197188	0.0197787	0.0140376	0.013779	0.0223425	0.0210933	0.0227526	0.0243602	0.0310148	0.0277072	0.0175292	0.0184067	0.0164743	0.0157106	0.0186017	0.0170935	0.0136916	0.0149157
0.0161679	0.0159249	0.0166949	0.0163592	0.0227878	0.0225528	0.0181865	0.0208448	0.0235853	0.0231408	0.0168994	0.0179192	0.0162404	0.0172634	0.0191462	0.0186806	0.0154249	0.0203278	0.0189256	0.0170403	0.0208871	0.0223582	0.0169146	0.0198533	0.0231547	0.0227036	0.0225109	0.0248105	0.0211224	0.0223095	0.0209898	0.0210032	0.0209894	0.0226087	0.0179681	0.0153095	0.0200297	0.0203037	0.0207906	0.0241193	0.0309446	0.0304935	0.0223771	0.0224639	0.0191302	0.0192948	0.0245182	0.0193981	0.0176054	0.0175991
0.0128107	0.0128243	0.0151485	0.0158139	0.0209391	0.0210149	0.0175173	0.0170467	0.0195163	0.0194577	0.0174768	0.0148284	0.0166525	0.0162169	0.017684	0.017932	0.0175446	0.020219	0.0184447	0.0168384	0.022461	0.0197751	0.017026	0.0191849	0.0205894	0.0208504	0.0196551	0.0211789	0.0229696	0.0217298	0.0193144	0.0184105	0.0192019	0.0193918	0.0155922	0.0140545	0.0252655	0.0238558	0.0230006	0.0251095	0.0337895	0.0291247	0.0176199	0.0185111	0.0152864	0.015086	0.0219575	0.0189125	0.0141203	0.0139302
0.0192214	0.0179993	0.0231124	0.0226644	0.0267481	0.0268965	0.0244281	0.0258681	0.0268746	0.0276174	0.024073	0.0222758	0.0212085	0.0212306	0.0219245	0.0225334	0.0235847	0.0251917	0.0251631	0.0239507	0.0291945	0.028406	0.0243543	0.0262087	0.0279364	0.0274753	0.0269702	0.027844	0.028742	0.0290143	0.0263463	0.0277752	0.0231256	0.0257793	0.0229735	0.0222775	0.0326008	0.0313925	0.0310944	0.0308062	0.0409021	0.0368428	0.0327371	0.0322512	0.0282176	0.0282265	0.0282289	0.025799	0.0224729	0.0229315
0.0203331	0.0202477	0.0208026	0.0210756	0.023621	0.0234864	0.0245408	0.0255208	0.021378	0.0198792	0.0198074	0.0204966	0.0194447	0.0199042	0.0217062	0.0215559	0.0203051	0.0222398	0.0236302	0.0226095	0.0321256	0.0317657	0.0202479	0.0208636	0.0254409	0.0246129	0.0258978	0.025975	0.0250176	0.0260243	0.0302869	0.0293374	0.0281136	0.0312736	0.0231581	0.0229057	0.0258922	0.0226971	0.0284518	0.0290685	0.0339339	0.0297829	0.0226258	0.0210779	0.0208858	0.0205008	0.0243113	0.0227353	0.0190419	0.0184214
0.018526	0.0170198	0.0193295	0.020055	0.0260912	0.0277841	0.0231635	0.0228861	0.0258475	0.0276276	0.0202944	0.0231468	0.0197989	0.0202184	0.0207705	0.021827	0.0208068	0.0221135	0.01939	0.0162648	0.0258515	0.0236522	0.0204479	0.022275	0.0265163	0.0270572	0.0257949	0.0255743	0.023615	0.0255717	0.0242808	0.0231291	0.0253064	0.0249462	0.0221439	0.0177834	0.0276918	0.0261289	0.0284816	0.0277199	0.0359515	0.0321458	0.0216584	0.0215742	0.0200829	0.0185756	0.0252125	0.0226598	0.0193738	0.0175661
0.0165335	0.0149555	0.0181149	0.0179395	0.0216548	0.0227203	0.0208581	0.0225867	0.0241088	0.0254515	0.0179094	0.0185637	0.0178719	0.0182832	0.0191204	0.0198606	0.0183375	0.0199465	0.0185529	0.0160443	0.0234151	0.0222332	0.0183218	0.0206379	0.0240346	0.0239434	0.0216967	0.0249807	0.0223991	0.0233511	0.0234982	0.0227582	0.0230016	0.0244932	0.0192682	0.0172817	0.0260174	0.0258339	0.026443	0.0288784	0.0333596	0.0303316	0.0227006	0.0222626	0.0186134	0.0191554	0.0258176	0.0227338	0.0168405	0.016282
0.0164482	0.0166988	0.0142178	0.0135371	0.0215336	0.0218743	0.0176944	0.020416	0.0203624	0.0224426	0.0157573	0.0185686	0.0161017	0.0169529	0.017713	0.0183396	0.0157298	0.0210615	0.015058	0.0138778	0.026368	0.0256211	0.0151532	0.016001	0.0223855	0.0223424	0.024007	0.0258921	0.0193008	0.0214936	0.0225871	0.0214316	0.0221126	0.0235838	0.0215477	0.0207265	0.0255026	0.0242366	0.0276768	0.0280863	0.0322801	0.0299407	0.0198569	0.0210081	0.0198651	0.0190895	0.0226734	0.020346	0.0193972	0.0186286
0.010628	0.00896002	0.00878116	0.00818143	0.00824859	0.00749057	0.0113319	0.0086294	0.00736853	0.00622082	0.0117774	0.012277	0.0136796	0.0111393	0.0106374	0.00898733	0.0137382	0.0143836	0.0111522	0.0130034	0.0166563	0.0176293	0.00850115	0.00928544	0.0125049	0.0139531	0.0131126	0.0144231	0.0134652	0.0142721	0.0131288	0.0180846	0.0181813	0.019998	0.0188676	0.0132489	0.0206221	0.0172495	0.0210541	0.0243377	0.0129504	0.0146245	0.0173173	0.0151504	0.013732	0.0123538	0.0209686	0.0164471	0.0111318	0.0121898
0.0115957	0.00967409	0.00983878	0.00965578	0.0101375	0.00929422	0.0127534	0.0107076	0.00872123	0.00741141	0.0132245	0.0132781	0.0142585	0.0118959	0.0134189	0.0115167	0.0166585	0.015486	0.0143752	0.0144064	0.0174218	0.0161902	0.0113675	0.0110741	0.0154449	0.0161393	0.0174605	0.0175097	0.0186314	0.0174454	0.0194901	0.0204657	0.0194928	0.0200765	0.0166717	0.0102288	0.0213355	0.0170138	0.0199205	0.0229089	0.0153641	0.0171949	0.0172636	0.0166906	0.0160934	0.0151856	0.0199666	0.0188064	0.0117382	0.0134021
0.00996218	0.00840124	0.00785776	0.00742361	0.00815509	0.00725725	0.00939665	0.00688761	0.00748945	0.00606854	0.0120161	0.0103226	0.0133049	0.00976202	0.0117631	0.00985409	0.0133634	0.0137455	0.00994743	0.0113732	0.014677	0.0151115	0.00773383	0.00872092	0.0123706	0.0133162	0.0126373	0.0131591	0.0153049	0.0150301	0.011984	0.0172283	0.0169096	0.0182725	0.0151007	0.0101432	0.0209631	0.0181222	0.0173304	0.0212465	0.0139069	0.0149939	0.0142824	0.0137323	0.0136867	0.0136941	0.0187522	0.0161767	0.0109687	0.0129875
0.0107469	0.00740015	0.00849263	0.00831421	0.00818008	0.00761085	0.0103702	0.0079282	0.00705673	0.00594975	0.0119555	0.0124911	0.0138876	0.0104039	0.0111358	0.00937942	0.013811	0.0142606	0.0111288	0.0117278	0.0136071	0.014099	0.00848547	0.00877731	0.0110638	0.0125957	0.0118457	0.0130919	0.0146482	0.0132105	0.0132516	0.0179816	0.0166354	0.0194966	0.0129171	0.00924455	0.0185868	0.0145514	0.0167332	0.0200846	0.0103641	0.0135638	0.0162092	0.016763	0.0130362	0.0132735	0.0195169	0.0173389	0.0105109	0.0117928
0.0162891	0.016527	0.0187827	0.0184496	0.0249227	0.0231421	0.019892	0.0220257	0.0237312	0.0255818	0.0168292	0.0204051	0.0176624	0.0195082	0.0203831	0.0217675	0.0180728	0.0194695	0.0183985	0.0171396	0.024919	0.0227639	0.0201546	0.0215136	0.0257371	0.0245374	0.0236317	0.0241157	0.0210328	0.023764	0.0242115	0.0234369	0.0238712	0.0234641	0.0171149	0.0169935	0.0209606	0.0226752	0.0239281	0.0259487	0.030271	0.029076	0.0224284	0.0237729	0.0204688	0.0207846	0.0242796	0.0229269	0.0177608	0.0174881
0.0129212	0.00987721	0.00813373	0.00809117	0.00879232	0.00779981	0.0109065	0.00768049	0.00825462	0.00617542	0.0139126	0.0132681	0.0154314	0.0118757	0.0125695	0.0101642	0.0164218	0.0162771	0.011785	0.0127505	0.019657	0.0188961	0.00848528	0.00900728	0.01363	0.0156074	0.0156362	0.0164545	0.0181396	0.0170099	0.0163905	0.0200774	0.0193883	0.0224735	0.0165054	0.0126856	0.0217458	0.0161943	0.0228367	0.0257333	0.0167987	0.0169543	0.0177016	0.017211	0.0143309	0.0143794	0.0230788	0.0198454	0.0118086	0.0114464
0.0108441	0.00897766	0.00926	0.00799635	0.00880988	0.00812289	0.011206	0.00923315	0.00860299	0.00703515	0.013854	0.013995	0.0152182	0.0127824	0.0125746	0.0108293	0.0141176	0.0160701	0.0111665	0.0128631	0.0165771	0.0175665	0.00945298	0.00982352	0.0132426	0.0148673	0.0139733	0.0153906	0.0159489	0.01542	0.0150425	0.021171	0.0183959	0.0215788	0.0177379	0.0133675	0.0216285	0.0181406	0.0203707	0.0247854	0.014829	0.0166495	0.0171559	0.0178445	0.0155907	0.0155946	0.021096	0.0198347	0.0120411	0.0138539
0.0119629	0.00977236	0.00938553	0.0090898	0.0102154	0.0093816	0.0126166	0.00983247	0.00942107	0.00791634	0.0141599	0.0137557	0.0159836	0.0122236	0.0145348	0.0121777	0.0166794	0.0169609	0.0141006	0.0137902	0.0194054	0.0186302	0.0116768	0.0108398	0.0152103	0.0168287	0.0170444	0.0172177	0.0197653	0.0198148	0.0201298	0.0234063	0.0225154	0.0227952	0.0193112	0.0127993	0.0233705	0.0205472	0.0238829	0.0273273	0.01708	0.0191936	0.0172231	0.0157797	0.0157924	0.0139606	0.020758	0.0172106	0.0108312	0.0145172
0.0194125	0.0185188	0.0211144	0.0205734	0.0262948	0.0243194	0.0232932	0.0240783	0.0283659	0.0275457	0.0189621	0.021703	0.0212971	0.0205506	0.023407	0.0234475	0.0231307	0.0292465	0.0222473	0.0207794	0.0331843	0.0321186	0.0227046	0.0254513	0.0277879	0.0260142	0.0298349	0.0304788	0.0289606	0.0296748	0.02733	0.0287485	0.0269918	0.0302512	0.0235273	0.0226673	0.0333825	0.0333703	0.0297026	0.0295105	0.040211	0.0341673	0.024161	0.0248396	0.0238887	0.021763	0.0248725	0.0218793	0.0182516	0.0174423
0.019328	0.0176185	0.0225951	0.0208625	0.0291911	0.0279056	0.0239755	0.0253018	0.027604	0.0293235	0.0240504	0.0239402	0.0213375	0.0238008	0.0233922	0.0254869	0.0277509	0.0277619	0.0237916	0.0209496	0.0353637	0.0309327	0.023458	0.027036	0.0313828	0.0308711	0.0337344	0.0335288	0.031629	0.0304748	0.0260179	0.0243047	0.0260006	0.0276172	0.0189468	0.0160286	0.0348523	0.0326248	0.0310219	0.0327093	0.0409692	0.0383323	0.0249715	0.0243365	0.0235262	0.0236493	0.0237848	0.0239709	0.0182364	0.0223598
0.0143927	0.0131071	0.0154688	0.014502	0.0225133	0.0209661	0.019011	0.0188636	0.0233225	0.0219503	0.0160275	0.0172916	0.0173806	0.0163531	0.0180611	0.0178173	0.0165614	0.0194765	0.0160565	0.0144252	0.02397	0.0222305	0.0158629	0.016816	0.022768	0.0206612	0.0218354	0.0233298	0.0207108	0.0204641	0.0189669	0.0167943	0.0224148	0.0226975	0.0180404	0.0161783	0.0223849	0.0184287	0.0214569	0.0210518	0.0299381	0.0251357	0.0182662	0.0188898	0.0185774	0.0172155	0.0226999	0.0199762	0.0150009	0.0156193
0.0128857	0.012057	0.0164756	0.0156719	0.0214063	0.0206582	0.0173619	0.0177393	0.0193936	0.0226537	0.0183915	0.015116	0.0174734	0.0176065	0.0176275	0.0190151	0.0155072	0.019979	0.0163487	0.0159909	0.0211524	0.0210552	0.0178764	0.0196521	0.0191899	0.0204034	0.0195354	0.0208797	0.0226987	0.0242266	0.0181956	0.0184815	0.0192082	0.0203543	0.0186894	0.0153001	0.0226543	0.0221524	0.022448	0.0251449	0.0320187	0.0281647	0.0164032	0.0169872	0.0172424	0.016792	0.0211304	0.0175855	0.0143065	0.0148495
0.0186901	0.0176978	0.0196702	0.019634	0.0272669	0.026984	0.0228204	0.0244338	0.0279044	0.0291762	0.0202464	0.0224263	0.0213156	0.0218415	0.0223244	0.0234783	0.0217937	0.025175	0.0209644	0.0170648	0.0291763	0.0256508	0.0206823	0.0233401	0.0282059	0.0269207	0.0277495	0.0281519	0.0262521	0.0274449	0.0253332	0.0257891	0.026393	0.0274372	0.022718	0.019841	0.0231878	0.0220825	0.0290469	0.0296021	0.038727	0.0358232	0.0233257	0.0247805	0.0209025	0.0209375	0.026441	0.0235812	0.0164692	0.0189271
0.0184838	0.0163973	0.0203849	0.0203744	0.0253961	0.0245986	0.0223682	0.0239935	0.0244153	0.0242007	0.0213528	0.0202393	0.0192973	0.0195442	0.0209862	0.0209586	0.0217884	0.0226686	0.0220821	0.0192796	0.02962	0.0265338	0.0208617	0.0215932	0.0259987	0.0241565	0.0255606	0.0275846	0.0263015	0.0266645	0.023225	0.0240325	0.0256396	0.0273414	0.0258398	0.0233084	0.0267872	0.0246916	0.0271803	0.0283079	0.0361321	0.0326498	0.0265123	0.0281475	0.0218764	0.0226429	0.0259809	0.0235289	0.0186527	0.0200697
0.0181971	0.0158631	0.0176285	0.0177905	0.0211934	0.022264	0.0192378	0.0206787	0.0207529	0.0213103	0.0182542	0.0163107	0.0168601	0.0169882	0.0190861	0.0200912	0.0175406	0.0201555	0.0195161	0.0176559	0.0261457	0.0225229	0.0175862	0.0189818	0.021333	0.0226733	0.0219424	0.0252685	0.0214206	0.0211589	0.0237119	0.0219233	0.0240858	0.0236016	0.0209785	0.0181615	0.0233107	0.0182771	0.0273401	0.0285069	0.0339444	0.0290798	0.0202919	0.020543	0.016849	0.0173395	0.0241903	0.0195035	0.0155535	0.015323
0.0193234	0.0170965	0.0196076	0.0190144	0.025328	0.0250854	0.0222267	0.0222108	0.0258009	0.0243238	0.021207	0.0202136	0.019428	0.0183297	0.0227017	0.0217066	0.0226597	0.0246914	0.0220712	0.019645	0.0329847	0.0282744	0.0221969	0.0247922	0.0267828	0.0265349	0.0296011	0.0293113	0.0278169	0.0279126	0.0265438	0.0254411	0.0271639	0.027608	0.0206232	0.0193443	0.0295941	0.0257147	0.0283893	0.0310473	0.0406165	0.0360032	0.0233275	0.0236905	0.0216118	0.0225943	0.0241618	0.0219787	0.017044	0.0170649
0.0170024	0.0164815	0.0166327	0.0169846	0.022583	0.0225411	0.0188113	0.0206518	0.0217435	0.0224112	0.0171955	0.0170056	0.0158362	0.0158198	0.019239	0.0189262	0.0186858	0.0193498	0.0176995	0.016402	0.022957	0.0238171	0.0171326	0.0178576	0.020383	0.021144	0.0211958	0.0207453	0.0226334	0.0235384	0.0216093	0.0205481	0.0225378	0.0220731	0.0192298	0.0162577	0.0240763	0.0216361	0.0249065	0.0262413	0.0368138	0.0316898	0.018438	0.0193011	0.0178463	0.0160586	0.021665	0.0183316	0.0133793	0.0153204
0.0170146	0.0135562	0.0168734	0.015799	0.0226544	0.0233118	0.0185026	0.0194622	0.0215996	0.0222185	0.0186312	0.0173027	0.0161536	0.0175563	0.0188602	0.0200425	0.0201761	0.0235818	0.0187882	0.016654	0.0290609	0.0278507	0.0172159	0.0196322	0.0234973	0.023975	0.0234655	0.0245087	0.0254223	0.0264686	0.0222834	0.0215643	0.0211615	0.0223925	0.0215406	0.0197641	0.0310699	0.0301727	0.0276119	0.0302864	0.0389844	0.0364062	0.0230441	0.023662	0.0179014	0.0185335	0.025511	0.0215451	0.0156473	0.0161133
0.0156997	0.0160815	0.0167509	0.0168936	0.0224579	0.0222275	0.0183725	0.0197939	0.0218951	0.0212995	0.0164082	0.0173726	0.0159986	0.0164849	0.0170897	0.0185775	0.0158539	0.0187346	0.0185853	0.0168608	0.0221182	0.0230121	0.0177778	0.0196025	0.0225622	0.0216652	0.0225361	0.0229673	0.0210016	0.0234733	0.0203586	0.0198538	0.0213467	0.0220039	0.0176862	0.0145527	0.0207278	0.0201103	0.0234985	0.0255046	0.0330289	0.0303588	0.0167905	0.0163279	0.0157862	0.0156234	0.0215274	0.0171147	0.0118937	0.0127286
0.00985367	0.00890482	0.00823095	0.00809197	0.00855808	0.00754686	0.0110767	0.00833601	0.00777333	0.00647985	0.0123528	0.0115984	0.0136973	0.0111275	0.0123299	0.0100227	0.0134994	0.0134202	0.00992703	0.0122937	0.0151533	0.0152072	0.00883823	0.00912817	0.0128022	0.0136469	0.0132506	0.0150097	0.0158449	0.0142846	0.014956	0.0175429	0.0163405	0.0189145	0.0156239	0.0107441	0.0193893	0.0167033	0.0189632	0.0231172	0.0141374	0.0153902	0.0149721	0.0154375	0.0136119	0.0138477	0.0193098	0.0177372	0.0108901	0.0123517
0.0172935	0.017046	0.0188191	0.0182156	0.021328	0.0214694	0.0216564	0.0242042	0.0218544	0.022929	0.0179784	0.017522	0.0185083	0.0184527	0.0202447	0.020368	0.0201993	0.0224851	0.0202371	0.0187702	0.0285478	0.0246179	0.0196701	0.0205409	0.0241252	0.0227452	0.0228555	0.0240555	0.024763	0.0253879	0.0225032	0.0234166	0.0260502	0.0278474	0.0181005	0.0172762	0.0261449	0.0237147	0.0265448	0.0269892	0.0340133	0.0279776	0.0204251	0.0224419	0.0178991	0.0200565	0.0230304	0.0211291	0.0163804	0.0171879
0.0106446	0.00909636	0.00884122	0.00832275	0.00900977	0.00822886	0.0114155	0.00947345	0.00857295	0.00738677	0.0128298	0.0137062	0.0145304	0.0121019	0.011881	0.0109124	0.0147668	0.0158845	0.0121893	0.0120971	0.017002	0.0183638	0.00966169	0.0098909	0.0136602	0.0156662	0.0146078	0.0148575	0.0163585	0.0165292	0.0162634	0.0211033	0.0202618	0.0226936	0.0174299	0.0119367	0.0206931	0.0166074	0.0172489	0.0241692	0.0141186	0.0149575	0.0160556	0.0166789	0.0146865	0.0143996	0.0188521	0.018118	0.0114891	0.0126729
0.0116685	0.00905171	0.0100231	0.00965548	0.00991437	0.00915147	0.011529	0.00977236	0.00837118	0.00703052	0.0134274	0.014285	0.0151426	0.0131506	0.0138444	0.0123835	0.016786	0.0162749	0.0139619	0.0145698	0.0176286	0.0178692	0.0119448	0.01022	0.0150792	0.0165943	0.016042	0.0171024	0.0181978	0.0167465	0.0185276	0.0232519	0.0205996	0.0211197	0.0176428	0.0120617	0.0209795	0.0178431	0.0188375	0.0230393	0.0160516	0.0169784	0.0165418	0.0172074	0.0156424	0.0154188	0.0200717	0.0180337	0.0119354	0.0135014
0.0151756	0.0136312	0.0186167	0.0176678	0.0200321	0.019829	0.0211664	0.0217101	0.0206467	0.0215192	0.0189817	0.0197083	0.0170687	0.0185337	0.0186623	0.0192786	0.0217012	0.0233702	0.0194685	0.0165823	0.0238726	0.0246553	0.0189361	0.0203715	0.0206489	0.0204652	0.0204108	0.0222047	0.0249161	0.0263742	0.0179481	0.0182978	0.0189395	0.020783	0.0143328	0.0125436	0.0267663	0.024917	0.0220819	0.0234601	0.0337755	0.0275473	0.0243608	0.0221047	0.0191077	0.0195515	0.0219183	0.0187813	0.0158047	0.0165155
0.00889556	0.00771841	0.00740681	0.00679438	0.00698083	0.00612923	0.00842835	0.00686064	0.0066845	0.0052563	0.0103272	0.00983637	0.0113545	0.0095451	0.00999066	0.00797691	0.0118264	0.0128507	0.00979731	0.0106405	0.0127055	0.0130958	0.00789602	0.00800887	0.0102897	0.0114725	0.0112586	0.0114361	0.0135393	0.0114787	0.0121615	0.0158263	0.0146554	0.0165076	0.012707	0.00875388	0.0184126	0.0146536	0.0151375	0.0183389	0.012117	0.0132885	0.0141759	0.015321	0.0128144	0.0129299	0.0163477	0.015562	0.00931873	0.0114272
0.0148346	0.0137778	0.0161539	0.0164647	0.0236189	0.0233231	0.0194187	0.0208	0.0222313	0.0224236	0.0177944	0.0188799	0.0172044	0.0182489	0.0161892	0.0191177	0.0171418	0.0223756	0.0177934	0.0147532	0.0199711	0.0221523	0.0172538	0.0189812	0.0228502	0.0225286	0.0242256	0.0241726	0.018904	0.0224684	0.0212094	0.0202126	0.0224847	0.0226494	0.0180979	0.0142689	0.0203183	0.0233927	0.0183611	0.0232416	0.0247915	0.0271968	0.0176108	0.0182555	0.017891	0.0185816	0.0209835	0.0187283	0.0152355	0.0168165
0.0190185	0.019756	0.0230066	0.0210272	0.0275525	0.0266391	0.0261417	0.0285563	0.0280716	0.0290134	0.0192303	0.0217344	0.0226321	0.0229079	0.0225546	0.0235201	0.0235374	0.02683	0.0214499	0.0184439	0.0313826	0.0304083	0.0231869	0.0251763	0.0281992	0.0273062	0.0260426	0.0279772	0.024285	0.0270739	0.0290479	0.0311603	0.0275397	0.0288602	0.024928	0.0241346	0.0240984	0.025614	0.0275206	0.029287	0.0335312	0.0332105	0.0249912	0.0240263	0.026882	0.0265731	0.0261928	0.0220536	0.0221309	0.023507
0.0156855	0.0141371	0.016853	0.016706	0.022919	0.0212753	0.0187131	0.0195781	0.022677	0.0228991	0.0167048	0.0185454	0.0159412	0.0164533	0.017623	0.0177303	0.0194669	0.0214682	0.0199754	0.01792	0.0260029	0.0254665	0.0187727	0.0208781	0.0250412	0.0243838	0.0228845	0.0232636	0.0238413	0.0238033	0.0197891	0.0189909	0.0214475	0.0228959	0.0160324	0.0141009	0.0238031	0.0218808	0.0261167	0.02619	0.0339822	0.0286871	0.0211849	0.0199391	0.0212755	0.0190606	0.0230335	0.019301	0.0173007	0.0156611
0.0226271	0.0203851	0.0226012	0.0226993	0.0303239	0.0313322	0.0272037	0.0277435	0.0289443	0.0308256	0.0215359	0.0240703	0.0242632	0.0251359	0.0244631	0.0250167	0.0250289	0.0269729	0.0242036	0.0210723	0.0335167	0.0302956	0.0237551	0.0261667	0.0335971	0.0322659	0.0291119	0.0294257	0.0298689	0.0313287	0.0314754	0.0293693	0.0300871	0.029651	0.0219346	0.0216932	0.0320438	0.029973	0.033525	0.0361633	0.0427103	0.0398399	0.0278441	0.0286812	0.0244397	0.0253572	0.0293892	0.0276187	0.0217091	0.0239544
0.0175794	0.0164281	0.0183978	0.0189542	0.025283	0.0242698	0.0213248	0.021706	0.0232579	0.0249666	0.0200186	0.0226278	0.0201342	0.020011	0.0215857	0.0226449	0.0244171	0.0227236	0.0217049	0.019576	0.0281315	0.0249625	0.019401	0.0224019	0.0274792	0.0262624	0.0266692	0.028838	0.0282512	0.0270868	0.0215187	0.0222479	0.0222726	0.0250877	0.0177471	0.0156555	0.0319195	0.0303905	0.0274935	0.0297111	0.0377249	0.0334394	0.024878	0.0236707	0.0220859	0.0233535	0.0247855	0.0220268	0.0193665	0.0193572
0.0157491	0.0158262	0.0170896	0.0178474	0.0215609	0.0220677	0.0203914	0.0216436	0.0215982	0.0222069	0.0149971	0.0182637	0.0178461	0.0187618	0.0169738	0.0189742	0.0157153	0.0180685	0.020126	0.0172965	0.0208545	0.0173468	0.0183552	0.0217477	0.0229439	0.0210763	0.020723	0.0209744	0.0189388	0.0222034	0.0186233	0.0174272	0.0185342	0.0190063	0.0179879	0.0173746	0.0212164	0.0229146	0.0244336	0.0265938	0.0334538	0.0316646	0.0168305	0.0185464	0.0146078	0.0168257	0.0210401	0.0192064	0.0131527	0.0154107
0.0183477	0.0155542	0.019155	0.0181369	0.0218727	0.022903	0.0216339	0.0223366	0.0229702	0.0223904	0.0170589	0.019225	0.0175836	0.0188679	0.0210984	0.0226647	0.0212302	0.0239165	0.0222244	0.0215084	0.0284786	0.0273778	0.0192938	0.0208075	0.0222272	0.0227513	0.0221287	0.0222188	0.0250899	0.0258806	0.0205956	0.0221012	0.0240349	0.0245477	0.0209858	0.0173089	0.0244349	0.026191	0.0274944	0.0293174	0.0361846	0.0314683	0.0259195	0.0252311	0.0226948	0.0228968	0.0247869	0.0224338	0.0205077	0.0195181
0.0104296	0.00904612	0.0086206	0.0081405	0.00935069	0.00816494	0.0113326	0.00948577	0.00872208	0.00679821	0.0128938	0.0126896	0.0139223	0.0111246	0.0120179	0.010111	0.016003	0.0148836	0.0113627	0.0130688	0.0185089	0.0180128	0.00932467	0.0108223	0.0137851	0.0156901	0.0145914	0.016347	0.0173288	0.0156595	0.0165264	0.0215603	0.0174994	0.0198466	0.0166044	0.0120089	0.0241639	0.0199113	0.0216709	0.0283084	0.0163927	0.0162836	0.0152236	0.0185423	0.0139276	0.014011	0.0193762	0.0179764	0.0107418	0.0119113
0.0103605	0.00881945	0.00978547	0.00933629	0.00939514	0.00841498	0.0114395	0.00873502	0.00870792	0.00736305	0.0124258	0.0123499	0.0148147	0.0121523	0.0136126	0.0115747	0.0146235	0.0153399	0.0136627	0.0139605	0.0176844	0.0178594	0.0099662	0.0104086	0.0141079	0.0157742	0.0152147	0.015853	0.0174212	0.0151461	0.0161568	0.021441	0.0207985	0.0229269	0.0196493	0.0117317	0.0205479	0.0180373	0.018543	0.0242546	0.0145848	0.0166964	0.0165593	0.0160852	0.0145611	0.014623	0.0203065	0.0184527	0.0120966	0.0144923
0.0101201	0.00816112	0.00820973	0.00764044	0.00836351	0.00769561	0.0103044	0.00854799	0.00781274	0.00622822	0.0129326	0.0126013	0.0135049	0.012308	0.012297	0.0108944	0.013183	0.0140225	0.0106108	0.0117114	0.0155406	0.0151598	0.00932824	0.00878164	0.0126718	0.0141646	0.0135546	0.0144638	0.0154666	0.0143171	0.0142288	0.0181842	0.0162288	0.0187879	0.0154311	0.00985842	0.0200774	0.0154352	0.0193907	0.022594	0.0146875	0.014966	0.0132426	0.0136584	0.0124954	0.0123641	0.0181775	0.0164664	0.00996434	0.0105802
0.014717	0.0146222	0.0152838	0.0153516	0.0203432	0.0204553	0.0183155	0.0186509	0.0218091	0.0214167	0.0151939	0.0159733	0.0170511	0.0175729	0.0202035	0.0209679	0.016815	0.0214853	0.0162509	0.0155813	0.0248486	0.024833	0.0160013	0.0163621	0.0231841	0.0205135	0.0230742	0.0245809	0.0226954	0.0231256	0.0197696	0.0198679	0.0210978	0.0232206	0.0218358	0.0207216	0.0258364	0.0235963	0.0254686	0.0276182	0.0347593	0.0325304	0.0194341	0.0198936	0.0171749	0.0187003	0.0233116	0.0196663	0.0128329	0.0139277
0.0199835	0.0192374	0.0217438	0.0212848	0.0282955	0.0266492	0.0246078	0.0271815	0.028583	0.0266346	0.0209158	0.0216394	0.0207049	0.0218898	0.0242846	0.0241896	0.0227971	0.0248149	0.0236053	0.0217327	0.0309082	0.0316119	0.0219352	0.0229753	0.0274648	0.0268456	0.0256055	0.0276416	0.0290682	0.0317265	0.0282087	0.0273896	0.02909	0.0306807	0.0227767	0.0244839	0.0226683	0.0190909	0.0289125	0.0317287	0.0353462	0.0339593	0.0253989	0.0249638	0.0206846	0.0204589	0.0277106	0.0271055	0.017113	0.0179283
0.0168554	0.0166408	0.0174391	0.0182789	0.0226228	0.0232188	0.019545	0.0213974	0.0235083	0.0244565	0.0183372	0.0179768	0.017933	0.0177978	0.0209337	0.0204255	0.0201202	0.0240979	0.0176461	0.0175495	0.0244853	0.0248929	0.0174512	0.0223752	0.0244427	0.0240792	0.0223864	0.02331	0.0230164	0.024614	0.0221516	0.0223069	0.0208527	0.0233353	0.0182658	0.017246	0.0252955	0.0256792	0.0268575	0.0281492	0.0333204	0.0307936	0.0217985	0.0212846	0.0195522	0.0193293	0.0236213	0.0215329	0.0174412	0.0160927
0.0112809	0.00981811	0.00928883	0.00909393	0.00910261	0.00806017	0.0115998	0.00943189	0.00860562	0.00752723	0.0129285	0.0129988	0.0144556	0.0125353	0.0144229	0.012327	0.0164196	0.0159483	0.0125949	0.0139239	0.0168366	0.0177878	0.0105986	0.0107605	0.013796	0.0157504	0.0148458	0.0162493	0.0182555	0.0189084	0.0162613	0.0222865	0.017712	0.0204139	0.0163782	0.0115135	0.0234284	0.0193847	0.0216335	0.0240859	0.0163703	0.0177791	0.0151221	0.0154597	0.0132958	0.014665	0.0201344	0.0179806	0.0115122	0.0124499
0.0166301	0.0151141	0.0179565	0.0179326	0.0235744	0.0232037	0.0194637	0.0203288	0.0211554	0.0231076	0.0186233	0.0197045	0.0185328	0.0195223	0.0218983	0.0221096	0.0199501	0.0240647	0.0200344	0.0167529	0.0221346	0.0211278	0.0199013	0.0214848	0.0236275	0.024038	0.0251706	0.0257226	0.0228636	0.024634	0.021457	0.0204327	0.022279	0.0231646	0.0214154	0.0190119	0.028554	0.0262415	0.0278755	0.0305076	0.0388695	0.0350806	0.02123	0.020979	0.0188638	0.0203062	0.0246443	0.0216308	0.0186883	0.0187211
0.0162807	0.0148594	0.0158862	0.0165286	0.0217761	0.0216733	0.0173078	0.0196082	0.0215411	0.0242677	0.015302	0.0168502	0.0161427	0.0181811	0.0179072	0.0193681	0.0167066	0.0199067	0.0173647	0.0168743	0.0228842	0.0223734	0.0166611	0.0202256	0.0232765	0.0236491	0.0241149	0.024283	0.0203845	0.0228862	0.018916	0.0202496	0.0180264	0.0192734	0.0115169	0.0113712	0.0201762	0.0221227	0.0196732	0.0231082	0.0269114	0.0255122	0.0157931	0.0157051	0.0165019	0.0157706	0.0204305	0.0171888	0.0121904	0.0124957
0.0134926	0.0136535	0.017038	0.0152534	0.0213521	0.0206053	0.0170799	0.018593	0.019821	0.0212495	0.0161763	0.0168688	0.0159732	0.016402	0.0171546	0.0182283	0.0169741	0.0180606	0.0172358	0.0160817	0.0257296	0.022256	0.017923	0.0191735	0.0214607	0.0213263	0.0213552	0.0203457	0.0210065	0.0218723	0.0193463	0.0183539	0.0187937	0.0203476	0.0143507	0.014737	0.0252381	0.0207906	0.0258158	0.0255244	0.0343663	0.0299193	0.0207279	0.0222627	0.0210385	0.0215961	0.0214518	0.020312	0.016684	0.0191812
0.0147753	0.0145376	0.0160722	0.0169541	0.0236972	0.0247962	0.017948	0.0202956	0.0234669	0.0245684	0.0156179	0.0180193	0.0170881	0.017798	0.0190491	0.0202437	0.0161576	0.0210269	0.0174052	0.0164845	0.0235859	0.0222853	0.0178958	0.02063	0.0234681	0.0247048	0.0253844	0.0246949	0.0201078	0.0222843	0.0219767	0.0227502	0.0214097	0.0236876	0.0180844	0.0176485	0.0184123	0.0203568	0.0224201	0.025877	0.0297093	0.0279983	0.0166509	0.0177052	0.0138392	0.0167569	0.0190963	0.0183793	0.0107282	0.0125489
0.0177843	0.0192587	0.0216974	0.0213226	0.0270387	0.0271038	0.0236019	0.0259652	0.0276462	0.0288348	0.0217968	0.0224303	0.0213479	0.0230705	0.0242319	0.0260642	0.0225253	0.0260311	0.0226128	0.019413	0.031214	0.0278211	0.0241768	0.0256954	0.0284063	0.0300309	0.02708	0.0297138	0.0259116	0.0275546	0.0276777	0.0269853	0.0243313	0.0263926	0.0199538	0.0190051	0.0263564	0.0273251	0.0260803	0.0308683	0.0351418	0.0345882	0.0231796	0.0238615	0.0210003	0.021032	0.0254068	0.022668	0.0184569	0.0188563
0.0188435	0.0174309	0.0180419	0.0181643	0.024152	0.0223588	0.0203235	0.0207778	0.0232072	0.0240579	0.0181134	0.0185088	0.017705	0.0191063	0.0205844	0.0206777	0.020475	0.0225666	0.0211784	0.0189167	0.0269629	0.023943	0.0193986	0.0214784	0.0256122	0.0256201	0.0242379	0.0241341	0.0245309	0.0254585	0.0219308	0.0202481	0.0225155	0.0227659	0.0168682	0.0157678	0.0291515	0.0278284	0.0259321	0.0277938	0.0369213	0.0333427	0.0232743	0.0261362	0.020552	0.0208288	0.02365	0.0233622	0.0183469	0.0165658
0.0146165	0.0141494	0.0148937	0.0140715	0.0220556	0.0215104	0.0189625	0.019739	0.0213791	0.0212698	0.0151884	0.0152613	0.0154536	0.014837	0.0188807	0.018019	0.0162898	0.0199935	0.0160916	0.0140297	0.0264497	0.0220451	0.0167276	0.0171774	0.0218662	0.023252	0.0226297	0.0234808	0.0215309	0.022576	0.0227416	0.0226766	0.0232625	0.025203	0.0158453	0.0161367	0.0251224	0.0231466	0.0255036	0.0250391	0.034168	0.0299628	0.0197578	0.0200935	0.0169834	0.0174264	0.0224109	0.0200037	0.0147366	0.0159227
0.0170047	0.0153676	0.0213677	0.019764	0.0281533	0.0265928	0.0231699	0.0236274	0.0276323	0.0281419	0.020918	0.0213639	0.0207278	0.0196284	0.0224538	0.0231991	0.0210648	0.0224625	0.0225971	0.0158761	0.0278065	0.0273567	0.0215295	0.0228043	0.0281969	0.0292882	0.0286504	0.0301189	0.0249679	0.0267695	0.0259746	0.0258194	0.0275567	0.027312	0.0215941	0.0205332	0.0278038	0.0233398	0.0284409	0.0300523	0.0377636	0.0333182	0.0305078	0.029824	0.0243501	0.0236053	0.029527	0.0269864	0.0220786	0.0212074
0.0100154	0.00847303	0.0075227	0.00798567	0.00810448	0.00730998	0.010477	0.00801152	0.00717963	0.00560856	0.0118411	0.0110587	0.0129298	0.00975841	0.0109563	0.00965416	0.0143576	0.0130936	0.0121552	0.0119225	0.0152716	0.0138537	0.00947599	0.00828282	0.0122146	0.0131955	0.0137325	0.0133488	0.0165666	0.0156402	0.0149697	0.0162169	0.0180824	0.0169978	0.0127187	0.00844809	0.0176516	0.0147993	0.0157853	0.0204766	0.013253	0.0137284	0.0104474	0.0103452	0.0111652	0.0106599	0.0143065	0.0123874	0.00781231	0.00988622
0.0179215	0.0169738	0.0191845	0.0184028	0.0238563	0.023297	0.0206068	0.0205501	0.023499	0.0247485	0.0191203	0.0186931	0.019431	0.0188309	0.0199045	0.0206925	0.0200319	0.0226382	0.0209427	0.0193428	0.02581	0.0212841	0.0194158	0.0213627	0.0252363	0.0252736	0.0246943	0.0270007	0.0232202	0.0242267	0.0252754	0.024856	0.0238744	0.0246978	0.0215836	0.017523	0.0260284	0.0212809	0.025558	0.0260619	0.0345986	0.0298969	0.0229896	0.0222223	0.0206103	0.0191373	0.0253665	0.0204519	0.0172656	0.0148986
0.018717	0.0199808	0.0193931	0.0198067	0.0291377	0.0284169	0.0224083	0.0236275	0.0256707	0.0262079	0.0207587	0.0220399	0.0199253	0.0199597	0.0243006	0.0237087	0.0227573	0.0249836	0.020989	0.0207788	0.0324412	0.0297191	0.0209997	0.0231236	0.0317462	0.030434	0.0310313	0.0319485	0.0266408	0.0280577	0.0264432	0.0252979	0.0232363	0.0274954	0.0259235	0.0234088	0.0279863	0.0302566	0.0293731	0.0338695	0.0394351	0.0371936	0.0291609	0.0309418	0.0247237	0.0269785	0.0272238	0.0271563	0.0222188	0.0244511
0.0190546	0.0182376	0.0196083	0.0194138	0.0246976	0.0244852	0.0222881	0.0236843	0.0250363	0.024643	0.0197137	0.021059	0.0186808	0.0190095	0.0194147	0.020757	0.0192398	0.0234674	0.0228117	0.0223259	0.0272689	0.0268762	0.0204953	0.0243737	0.0242905	0.0247882	0.0255722	0.0264206	0.0239148	0.0273467	0.0231296	0.0225333	0.0258032	0.0306729	0.021721	0.0198412	0.02612	0.0275574	0.0275497	0.028795	0.0332463	0.0332359	0.0248398	0.0248715	0.0221556	0.022352	0.0247231	0.0234224	0.0186367	0.0171316
0.0162076	0.0149829	0.0177124	0.0185665	0.0218242	0.021915	0.0201327	0.0228908	0.0222721	0.0226747	0.0183278	0.0200381	0.0188069	0.0202023	0.0197725	0.0217725	0.0187467	0.0210069	0.0202836	0.0186596	0.023067	0.0187652	0.0192233	0.0221258	0.0237225	0.0231175	0.0224649	0.0214003	0.0211124	0.0236543	0.022284	0.019805	0.0231977	0.0243222	0.0158437	0.0165909	0.0280862	0.0246481	0.0250846	0.0247591	0.0326732	0.0283852	0.0232263	0.0226537	0.0229029	0.0231455	0.025414	0.0207044	0.0203422	0.020715
0.0180853	0.0170807	0.0231209	0.0202973	0.0272624	0.0279082	0.0242475	0.0258311	0.0261296	0.0278829	0.0231231	0.0238442	0.0225941	0.0230401	0.0233461	0.023421	0.0240911	0.0248603	0.0205614	0.0214783	0.0295624	0.027359	0.0234726	0.0272862	0.0278588	0.0274303	0.0277508	0.027601	0.0289958	0.0277682	0.0236335	0.0232391	0.0259647	0.027577	0.019122	0.0194984	0.0306349	0.0284397	0.0296033	0.0297888	0.037967	0.0346469	0.0265036	0.0248174	0.0245562	0.0231404	0.0259271	0.0253201	0.0204502	0.018918
0.0153568	0.0137468	0.0162672	0.0151562	0.0227158	0.0217999	0.018834	0.0201509	0.0218595	0.022815	0.0186274	0.0186632	0.0167155	0.0163164	0.0189648	0.0192527	0.0190738	0.0201486	0.0175926	0.0172524	0.0270081	0.0243245	0.0173277	0.0198899	0.024579	0.0238306	0.0245387	0.0237244	0.0241561	0.0235734	0.0223937	0.0218112	0.0195532	0.0210045	0.0161139	0.0151484	0.0262448	0.0227064	0.0241788	0.0240737	0.0342801	0.0295186	0.0199589	0.0192095	0.0172955	0.0181539	0.0212616	0.0194971	0.0147141	0.01581
0.0155774	0.0153622	0.0169812	0.0184116	0.0257278	0.0260847	0.0195414	0.0221037	0.0236829	0.0266084	0.0174908	0.0200763	0.0185173	0.0209161	0.0215396	0.0231799	0.0190051	0.0233298	0.0189045	0.0178333	0.0277738	0.0243789	0.0194402	0.0219002	0.025664	0.0260344	0.027462	0.0276054	0.0233581	0.0263156	0.0231511	0.0227519	0.0213521	0.022412	0.0191832	0.0159436	0.0235199	0.0202246	0.0262964	0.0285519	0.0390681	0.0347457	0.0206094	0.0236134	0.0134377	0.0177635	0.0203459	0.0198466	0.010138	0.0156687
0.0210461	0.0195469	0.0226234	0.0222766	0.0275554	0.0267023	0.024702	0.0262829	0.0300201	0.029427	0.0217802	0.0220686	0.0208983	0.0201792	0.0239783	0.0235059	0.0251892	0.0257142	0.0228099	0.0208925	0.0301956	0.0242471	0.0223263	0.0247016	0.0286123	0.0294018	0.0274929	0.0278053	0.0277234	0.0279641	0.0242541	0.0238197	0.025196	0.0271416	0.0185651	0.0173957	0.031275	0.0290732	0.0300482	0.0300574	0.0381045	0.0346542	0.0238457	0.0229705	0.0231668	0.0239324	0.0275788	0.0238545	0.0193684	0.0191638
0.0189204	0.0184131	0.022566	0.0228785	0.028617	0.0270859	0.0235773	0.024623	0.0261722	0.024932	0.0234487	0.0212338	0.0226419	0.0220331	0.0236163	0.0253498	0.0247408	0.026382	0.0237466	0.0220886	0.0298044	0.0277804	0.0231744	0.0262869	0.0309053	0.0292127	0.0291606	0.0297812	0.031091	0.031542	0.0247081	0.0238617	0.0259892	0.0259342	0.0221201	0.0206674	0.0292042	0.0291541	0.0283362	0.0307586	0.0385176	0.0372599	0.022517	0.021647	0.020033	0.022114	0.0256427	0.0220014	0.017358	0.018279
0.0159695	0.0148442	0.019592	0.0183783	0.0256996	0.0264051	0.0213109	0.0221539	0.0270645	0.02677	0.0203135	0.0208458	0.0193122	0.0190471	0.0222171	0.0220873	0.0213878	0.0245786	0.0186711	0.0178166	0.0286446	0.0250708	0.0198245	0.0225174	0.0295508	0.028998	0.0284152	0.028307	0.0267083	0.0281062	0.0228143	0.0227999	0.0244123	0.0265473	0.0199569	0.0179544	0.0229672	0.0232964	0.0254297	0.0267454	0.0350006	0.0318975	0.0237939	0.0236185	0.0250782	0.0220923	0.025162	0.023231	0.0200685	0.0210999
0.0176442	0.0188512	0.0206048	0.0211011	0.0289316	0.0277286	0.0205023	0.0240513	0.0258399	0.0262432	0.0184848	0.0207879	0.0186638	0.02027	0.021603	0.0231106	0.0197164	0.0213064	0.0208074	0.0199244	0.0324242	0.0284879	0.0216154	0.0236518	0.0288263	0.027972	0.0292011	0.0299932	0.0257442	0.0263743	0.0259514	0.0255063	0.0232158	0.0242908	0.0208442	0.0189758	0.0291576	0.0279411	0.0294956	0.0282115	0.038884	0.0336527	0.022852	0.0219431	0.0209548	0.0227767	0.0243647	0.0203258	0.020491	0.0185317
0.0209786	0.0193003	0.0221028	0.0216653	0.0274381	0.0270094	0.0229363	0.0236619	0.0272413	0.0278689	0.018514	0.0235718	0.0193481	0.0208674	0.0210181	0.0231688	0.0240739	0.0275069	0.0262417	0.021074	0.0322093	0.028632	0.0229857	0.0242086	0.0270337	0.0265586	0.0284005	0.0275287	0.0249522	0.027628	0.0249467	0.0249005	0.0259401	0.0273116	0.0238734	0.022943	0.0284291	0.0309091	0.0308481	0.0326865	0.0393411	0.0375542	0.0272741	0.0270495	0.0241656	0.024632	0.0268338	0.0234799	0.0204096	0.0205321
0.0128981	0.0127735	0.0155206	0.014584	0.0230028	0.0198318	0.0166844	0.0184776	0.020975	0.0202013	0.0155358	0.0157742	0.0156352	0.0153807	0.017777	0.0171154	0.0154937	0.0193945	0.0155018	0.0134745	0.0239764	0.0225613	0.016263	0.0177111	0.0241327	0.0232896	0.0233493	0.0247044	0.022917	0.0233315	0.0208355	0.0198767	0.0200569	0.0219193	0.0165166	0.0146139	0.021029	0.0210452	0.0213551	0.0250441	0.0321894	0.030028	0.0181061	0.0174013	0.0166691	0.0159567	0.0198822	0.0175744	0.0153466	0.0140533
0.0162541	0.0142691	0.0161365	0.0168041	0.0212319	0.0252348	0.0204746	0.020983	0.0214365	0.0224885	0.0180551	0.0190682	0.0180976	0.0180226	0.0178129	0.0188403	0.0214437	0.0213453	0.0186523	0.0177974	0.0250055	0.026307	0.0177653	0.0213367	0.0238548	0.0249223	0.023106	0.0254374	0.0249453	0.0260998	0.0184994	0.0196521	0.0198455	0.0225125	0.016303	0.0143412	0.0227269	0.0221766	0.0222412	0.0241703	0.0299963	0.0266844	0.0214843	0.0233994	0.0194061	0.0206034	0.0224223	0.0212688	0.0162569	0.0179448
0.0188752	0.0183423	0.0199695	0.0203723	0.025293	0.0260502	0.0215166	0.0238456	0.0242765	0.0260912	0.0204469	0.0210196	0.0200043	0.0197868	0.0211896	0.0225288	0.021511	0.0278134	0.0224224	0.0208728	0.0280219	0.0290586	0.0205171	0.0235303	0.0259741	0.025753	0.0253532	0.0262995	0.0241816	0.0276075	0.0265914	0.0247926	0.0245642	0.0260006	0.0220223	0.0239532	0.0285515	0.0277321	0.0281339	0.030106	0.0365006	0.0345049	0.0212197	0.0223446	0.0203404	0.0202023	0.0244031	0.0204077	0.0160985	0.0179767
0.0150333	0.0142771	0.0187142	0.0183345	0.0256218	0.0248588	0.0183809	0.0199937	0.0264069	0.0259382	0.0176226	0.0192952	0.0170045	0.0184495	0.0203335	0.0223774	0.0189016	0.0227524	0.0211854	0.0191286	0.02565	0.0252876	0.0213984	0.0234859	0.0271781	0.0275778	0.0271518	0.0266298	0.0231544	0.024958	0.0232609	0.0221663	0.0193279	0.0217184	0.0166133	0.016319	0.0261357	0.0266884	0.0250149	0.0278119	0.0317273	0.0294484	0.0224365	0.0224325	0.0208398	0.0190078	0.0250931	0.0217453	0.0173584	0.0181341
0.0165207	0.0155085	0.0197615	0.0183232	0.0286855	0.026613	0.0211641	0.0216314	0.0296326	0.0286678	0.0200168	0.0208545	0.0202055	0.0192306	0.0218728	0.0226027	0.0233399	0.0252475	0.0197796	0.0177163	0.029005	0.0263198	0.02091	0.0232792	0.0268237	0.0268596	0.0255368	0.0251889	0.0275394	0.0277504	0.0243533	0.0230358	0.0228991	0.0245145	0.0163364	0.0172104	0.0315914	0.0307864	0.0311939	0.0309262	0.0382639	0.0363008	0.0204473	0.0218706	0.0203549	0.0208914	0.0246947	0.0212359	0.0184312	0.0189539
0.0113299	0.00968505	0.0127117	0.0125402	0.0181873	0.0167324	0.0137311	0.0155128	0.0164138	0.0160596	0.0146036	0.0158097	0.013116	0.0126907	0.0135118	0.0137794	0.0150943	0.0168433	0.0136339	0.0131597	0.0188729	0.0186356	0.0133961	0.0151931	0.0188679	0.0188854	0.0175424	0.0183474	0.0202013	0.0211249	0.0154414	0.0152433	0.0160378	0.0169821	0.0113783	0.0110273	0.0167708	0.0181635	0.0191709	0.0208798	0.0293901	0.0281934	0.0145686	0.0157418	0.0128934	0.0124676	0.0172872	0.0155964	0.0103413	0.0114542
0.0165534	0.0167177	0.0191966	0.0187164	0.0254791	0.022364	0.0203437	0.022604	0.0246148	0.0259855	0.0198777	0.0205346	0.0197921	0.0194195	0.0232858	0.024203	0.0227284	0.0249098	0.0208076	0.0177098	0.0287256	0.028217	0.0205903	0.0222165	0.0288636	0.0274641	0.0269536	0.0262159	0.0260062	0.0263644	0.0251941	0.0250574	0.0254359	0.0273493	0.0228719	0.0231243	0.0264223	0.026508	0.0255069	0.0291528	0.0316174	0.0300924	0.0236951	0.0233443	0.0241953	0.0235998	0.0254184	0.0226379	0.0198773	0.0190981
[truncated: 94 more columns]
