# Supplementary material for: A Novel Approach for Early detection of Alzheimer's disease Based on Multi Level Fuzzy Neural Networks
Source: Preprints.org preprint supplement (doi:10.20944/preprints202103.0711.v1), 2021-03-29
Supplement: Supplementary file 2 [file AllLabels.xlsx]

## Sheet: Sheet1
3
2
1
2
3
1
3
1
1
1
1
1
1
1
3
1
1
2
2
2
1
2
2
1
1
2
2
3
2
1
1
2
1
1
1
1
1
1
1
1
3
2
3
2
1
3
3
1
2
3
1
1
3
3
3
1
1
1
2
2
2
1
2
2
3
3
2
2
1
2
1
1
1
1
2
1
2
3
1
2
2
3
2
2
3
3
2
2
1
2
2
2
1
2
2
1
1
1
2
1
2
2
2
3
1
1
2
3
3
1
2
2
2
1
3
2
3
2
3
2
1
2
2
3
1
1
2
1
2
2
1
2
2
1
2
1
1
1
3
2
1
2
1
2
2
3
2
2
2
2
2
1
1
3
3
1
1
1
2
3
1
1
2
1
3
1
3
2
2
2
1
3
2
3
2
1
2
3
3
2
2
1
2
3
1
1
2
2
1
3
1
3
3
3
2
2
2
1
2
1
2
2
2
2
2
3
3
1
2
2
2
2
2
1
2
1
2
1
1
2
2
1
2
3
1
2
1
3
1
2
2
2
2
2
2
1
2
1
2
2
1
2
3
1
3
2
1
2
2
1
1
3
1
3
1
1
2
1
2
1
2
2
2
2
1
3
2
1
1
1
1
1
3
2
1
1
3
2
3
2
1
2
3
1
2
2
2
1
3
2
1
1
3
2
2
1
1
3
1
2
2
2
3
1
1
2
1
3
2
2
1
2
2
1
3
2
1
2
2
3
2
2
3
2
1
2
1
2
3
1
2
1
1
2
3
2
2
2
2
2
1
2
1
2
1
3
1
1
1
3
3
3
1
2
2
2
2
2
2
1
3
1
2
3
2
2
2
3
2
1
2
3
1
3
1
1
2
2
2
1
3
3
3
3
1
1
1
2
2
2
3
1
1
2
2
3
3
3
2
3
2
1
3
1
3
3
1
2
1
2
3
3
2
2
2
2
3
2
3
1
1
3
1
3
2
3
3
2
2
2
1
1
2
2
2
2
2
2
1
3
2
2
3
2
1
1
2
2
1
2
2
2
2
2
2
1
2
2
1
2
2
1
2
2
1
2
1
3
2
2
2
2
1
3
3
2
1
1
1
1
2
2
2
3
1
2
1
1
2
3
2
3
2
3
1
2
2
1
2
1
1
2
1
3
1
1
3
3
2
2
2
2
2
1
3
2
2
3
2
3
2
2
2
2
3
2
3
3
1
2
2
2
2
2
2
2
3
2
3
3
3
1
2
2
1
3
2
1
1
3
3
2
2
3
3
2
2
2
2
2
2
2
2
1
2
1
2
3
2
2
3
2
2
3
2
3
3
3
2
2
1
3
3
2
2
3
3
2
2
2
1
1
3
1
1
1
2
1
1
1
2
3
1
3
2
1
2
2
3
1
2
2
2
2
1
2
1
2
2
2
2
2
3
1
1
3
2
1
2
1
3
3
2
1
2
2
2
1
2
2
1
3
2
3
2
3
1
1
3
3
2
2
2
2
2
1
3
1
3
3
2
2
2
2
2
2
2
2
2
3
2
3
2
2
2
2
2
2
3
2
3
3
2
2
2
3
2
2
3
2
2
2
3
2
2
2
2
2
2
2
2
2
2
3
3
